# Supplementary material for: Pd-catalyzed asymmetric hydrogenation of fluorinated aromatic pyrazol-5-ols via capture of active tautomers
Source: Royal Society of Chemistry journal article supplement (doi:10.1039/c5sc00835b), 2015-01-01
Supplement: c5sc00835b1.pdf [file c5sc00835b1.pdf]

## Supporting Information

### Pd-catalyzed asymmetric hydrogenation of fluorinated aromatic pyrazol-5-ols *via* capture of active tautomers

*Zhang-Pei Chen, Mu-Wang Chen, Lei Shi, Chang-Bin Yu, and Yong-Gui Zhou\**

*State Key Laboratory of Catalysis, Dalian Institute of Chemical Physics, Chinese Academy of Sciences, Dalian 116023, China. Collaborative Innovation Centre of Chemical Science and Engineering (Tianjin), Tianjin 300071, P. R. China*

#### Table of Contents

|                                                                                                                                                     |                 |
|-----------------------------------------------------------------------------------------------------------------------------------------------------|-----------------|
| <b>1. General and Materials.....</b>                                                                                                                | <b>S1</b>       |
| <b>2. General Procedure for Synthesis of Fluorinated Pyrazol-5-ols.....</b>                                                                         | <b>S1-4</b>     |
| <b>3. General Procedure for Hydrogenation of Disubstituted Fluorinated Pyrazol-5-ols 1a-1h.....</b>                                                 | <b>S4-6</b>     |
| <b>4. General Procedure for Hydrogenation of Disubstituted Fluorinated Pyrazol-5-ols 1i, 1j and Trisubstituted Fluorinated Pyrazol-5-ols 3.....</b> | <b>S6-9</b>     |
| <b>5. Mechanistic Investigation.....</b>                                                                                                            | <b>S9-11</b>    |
| <b>6. The X-ray Crystallographic Analysis of Substrate 3a and Products.....</b>                                                                     | <b>S11-12</b>   |
| <b>7. References.....</b>                                                                                                                           | <b>S12</b>      |
| <b>8. Copy of NMR of Substrates and Products.....</b>                                                                                               | <b>S13-120</b>  |
| <b>9. Copy of HPLC for Racemic and Chiral Products.....</b>                                                                                         | <b>S121-138</b> |

## 1. General and Materials

**General:** Commercially available reagents were used without further purification. Solvents were treated prior to use according to the standard methods.  $^1\text{H}$  NMR,  $^{13}\text{C}$  NMR and  $^{19}\text{F}$  NMR spectra were recorded at room temperature in  $\text{CDCl}_3$  on 400 MHz instrument with tetramethylsilane (TMS) as internal standard. Enantiomeric excess was determined by HPLC analysis, using chiral column described below in detail. Optical rotations were measured by polarimeter. Flash column chromatography was performed on silica gel (200-300 mesh).

## 2. General Procedure for Synthesis of Fluorinated Pyrazol-5-ols

All fluorinated pyrazol-5-ols were prepared from the accessible starting materials appropriate fluorinated  $\beta$ -ketoesters and arylhydrazines according to the literature methods.<sup>[1]</sup> Pyrazol-5-ol **1a** is known and its NMR data matched the literature data.

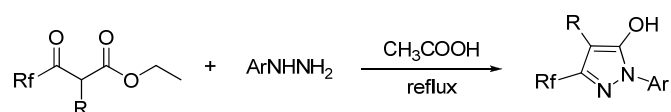

Fluorinated  $\beta$ -ketoesters (5.0 mmol) and arylhydrazines (5.0 mmol) were mixed and refluxed in acetic acid (30 mL) for 6 h. Then the mixture was cooled to room temperature. After filtration, the residue was recrystallized from ethanol to give the pure fluorinated pyrazol-5-ols.

**1-(*o*-Tolyl)-3-(trifluoromethyl)-1H-pyrazol-5-ol (1b):** Pale yellow solid; mp = 204-205 °C, yield 58%;  $^1\text{H}$  NMR (400 MHz,  $\text{DMSO-}d_6$ )  $\delta$  12.03 (br, 1H), 7.45–7.37 (m, 2H), 7.37–7.29 (m, 2H), 5.91 (s, 1H), 2.07 (s, 3H);  $^{13}\text{C}$  NMR (100 MHz,  $\text{DMSO-}d_6$ )  $\delta$  154.4, 140.7 (q,  $J_{\text{C-F}}$  = 37 Hz), 136.7, 135.6, 131.2, 129.8, 128.1, 127.0, 121.9 (q,  $J_{\text{C-F}}$  = 267 Hz), 84.7, 17.5;  $^{19}\text{F}$  NMR (377 MHz,  $\text{DMSO-}d_6$ )  $\delta$  -61.6 (s, 3F); IR (film): 2808, 2714, 1558, 1504, 1422, 1259, 1218, 1198, 1157, 1136; HRMS Calculated For  $\text{C}_{11}\text{H}_{10}\text{F}_3\text{N}_2\text{O}$   $[\text{M}+\text{H}]^+$  243.0745, found: 243.0740.

**1-(*m*-Tolyl)-3-(trifluoromethyl)-1H-pyrazol-5-ol (1c):** Pale yellow solid; mp = 210-211 °C, yield 62%;  $^1\text{H}$  NMR (400 MHz,  $\text{DMSO-}d_6$ )  $\delta$  12.42 (br, 1H), 7.57-7.52 (m, 2H), 7.36 (t,  $J$  = 7.7 Hz, 1H), 7.16 (d,  $J$  = 7.4 Hz, 1H), 5.97 (s, 1H), 2.36 (s, 3H);  $^{13}\text{C}$  NMR (100 MHz,  $\text{DMSO-}d_6$ )  $\delta$  154.1, 140.8 (q,  $J_{\text{C-F}}$  = 37 Hz), 139.1, 138.2, 129.2, 128.2, 123.2, 121.4 (q,  $J_{\text{C-F}}$  = 266 Hz), 119.8, 86.0, 21.3;  $^{19}\text{F}$  NMR (377 MHz,  $\text{DMSO-}d_6$ )  $\delta$  -62.0 (s, 3F); IR (film): 2826, 1612, 1565, 1490, 1408, 1333, 1245, 1150, 1116; HRMS Calculated For  $\text{C}_{11}\text{H}_{10}\text{F}_3\text{N}_2\text{O}$   $[\text{M}+\text{H}]^+$  243.0745, found: 243.0740.

**1-(*p*-Tolyl)-3-(trifluoromethyl)-1H-pyrazol-5-ol (1d):** Pale yellow solid; mp = 226-227 °C, yield 63%;  $^1\text{H}$  NMR (400 MHz,  $\text{DMSO-}d_6$ )  $\delta$  12.38 (br, 1H), 7.59 (d,  $J$  = 8.4 Hz, 2H), 7.30 (d,  $J$  = 8.3 Hz, 2H), 5.93 (s, 1H), 2.34 (s, 3H);  $^{13}\text{C}$  NMR (100 MHz,  $\text{DMSO-}d_6$ )  $\delta$  154.0, 140.6 (q,  $J_{\text{C-F}}$  = 37 Hz), 137.1, 135.8, 129.9, 122.7, 122.0 (q,  $J_{\text{C-F}}$  = 267 Hz), 86.0, 21.0;  $^{19}\text{F}$  NMR (377 MHz,  $\text{DMSO-}d_6$ )  $\delta$  -61.8 (s, 3F); IR (film): 2883, 1572, 1490, 1415, 1347, 1259, 1415, 1347, 1259, 1218, 1157, 1110; HRMS Calculated For  $\text{C}_{11}\text{H}_{10}\text{F}_3\text{N}_2\text{O}$   $[\text{M}+\text{H}]^+$  243.0745, found: 243.0740.

**1-(4-Methoxyphenyl)-3-(trifluoromethyl)-1H-pyrazol-5-ol (1e):** Pale yellow solid; mp = 209-210 °C, yield 53%; <sup>1</sup>H NMR (400 MHz, DMSO-*d*<sub>6</sub>) δ 12.29 (br, 1H), 7.58 (d, *J* = 9.0 Hz, 2H), 7.07–7.04 (m, 2H), 5.91 (s, 1H), 3.80 (s, 3H); <sup>13</sup>C NMR (100 MHz, DMSO-*d*<sub>6</sub>) δ 158.7, 153.8, 140.2 (q, *J*<sub>C-F</sub> = 37 Hz), 131.2, 124.6, 122.4 (q, *J*<sub>C-F</sub> = 267 Hz), 114.6, 85.8, 55.9; <sup>19</sup>F NMR (377 MHz, DMSO-*d*<sub>6</sub>) δ -61.7 (s, 3F); IR (film): 2937, 2822, 1613, 1591, 1562, 1499, 1416, 1354, 1306, 1254, 1130, 1096, 1025; HRMS Calculated For C<sub>11</sub>H<sub>10</sub>F<sub>3</sub>N<sub>2</sub>O<sub>2</sub> [M+H]<sup>+</sup> 259.0694, found 259.0689.

**1-(3-Chlorophenyl)-3-(trifluoromethyl)-1H-pyrazol-5-ol (1f):** Pale yellow solid; mp = 220-221 °C, yield 57%; <sup>1</sup>H NMR (400 MHz, DMSO-*d*<sub>6</sub>) δ 12.80 (br, 1H), 7.81 (d, *J* = 1.7 Hz, 1H), 7.75 (d, *J* = 8.7 Hz, 1H), 7.52 (t, *J* = 8.1 Hz, 1H), 7.41 (d, *J* = 8.1 Hz, 1H), 5.96 (s, 1H); <sup>13</sup>C NMR (100 MHz, DMSO-*d*<sub>6</sub>) δ 154.6, 141.5 (q, *J*<sub>C-F</sub> = 37 Hz), 139.4, 133.9, 131.2, 127.3, 121.9, 121.5 (q, *J*<sub>C-F</sub> = 267 Hz), 120.7, 86.3; <sup>19</sup>F NMR (377 MHz, DMSO-*d*<sub>6</sub>) δ -62.2 (s, 3F); IR (film): 3169, 2802, 1585, 1559, 1505, 1473, 1429, 1401, 1330, 1256, 1139, 1105, 1044; HRMS Calculated For C<sub>10</sub>H<sub>7</sub>ClF<sub>3</sub>N<sub>2</sub>O [M+H]<sup>+</sup> 263.0199, found: 263.0194.

**1-(3,4-Dichlorophenyl)-3-(trifluoromethyl)-1H-pyrazol-5-ol (1g):** Pale yellow solid; mp = 213-214 °C, yield 57%; <sup>1</sup>H NMR (400 MHz, DMSO-*d*<sub>6</sub>) δ 12.90 (br, 1H), 7.98 (d, *J* = 2.2 Hz, 1H), 7.79-7.75 (m, 1H), 7.74–7.68 (m, 1H), 5.94 (s, 1H); <sup>13</sup>C NMR (100 MHz, DMSO-*d*<sub>6</sub>) δ 154.8, 141.7 (q, *J*<sub>C-F</sub> = 37 Hz), 137.9, 132.0, 131.5, 129.7, 123.4, 121.9, 121.9 (q, *J*<sub>C-F</sub> = 267 Hz), 86.3; <sup>19</sup>F NMR (377 MHz, DMSO-*d*<sub>6</sub>) δ -62.3 (s, 3F); IR (film): 3159, 3090, 2914, 1594, 1573, 1557, 1502, 1472, 1385, 1261, 1247, 1202, 1160; HRMS Calculated For C<sub>10</sub>H<sub>6</sub>Cl<sub>2</sub>F<sub>3</sub>N<sub>2</sub>O [M+H]<sup>+</sup> 296.9809, found: 296.9804.

**1-(4-Fluorophenyl)-3-(trifluoromethyl)-1H-pyrazol-5-ol (1h)** Pale yellow solid; mp = 216-217 °C, yield 60%; <sup>1</sup>H NMR (400 MHz, DMSO-*d*<sub>6</sub>) δ 12.54 (br, 1H), 7.77–7.70 (m, 2H), 7.35–7.29 (m, 2H), 5.94 (s, 1H); <sup>13</sup>C NMR (100 MHz, DMSO-*d*<sub>6</sub>) δ 161.2 (d, *J*<sub>C-F</sub> = 245 Hz), 154.1, 140.9 (q, *J*<sub>C-F</sub> = 37 Hz), 134.5 (d, *J*<sub>C-F</sub> = 2.8 Hz), 125.0 (d, *J*<sub>C-F</sub> = 8.7 Hz), 122.8 (q, *J*<sub>C-F</sub> = 267 Hz), 116.4 (d, *J*<sub>C-F</sub> = 22.9 Hz), 86.0; <sup>19</sup>F NMR (377 MHz, DMSO-*d*<sub>6</sub>) δ -62.0 (s, 3F), -114.8 (s, 1F); IR (film): 3084, 1610, 1571, 1499, 1405, 1331, 1217, 1191, 1135, 1096; HRMS Calculated For C<sub>10</sub>H<sub>7</sub>F<sub>4</sub>N<sub>2</sub>O [M+H]<sup>+</sup> 247.0495, found: 247.0489.

**3-(Perfluoroethyl)-1-phenyl-1H-pyrazol-5-ol (1i):** Pale yellow solid; mp = 190-191 °C, yield 69%; <sup>1</sup>H NMR (400 MHz, DMSO-*d*<sub>6</sub>) δ 12.51 (br, 1H), 7.75 (d, *J* = 7.8 Hz, 2H), 7.50 (t, *J* = 7.7 Hz, 2H), 7.36 (t, *J* = 7.3 Hz, 1H), 5.97 (s, 1H); <sup>13</sup>C NMR (100 MHz, DMSO-*d*<sub>6</sub>) δ 154.4, 139.6 (t, *J*<sub>C-F</sub> = 28 Hz), 138.2, 129.5, 127.6, 122.6, 118.7 (qt, *J*<sub>C-F</sub> = 284 Hz, 39 Hz), 111.2 (tq, *J*<sub>C-F</sub> = 248 Hz, 38 Hz), 87.1; <sup>19</sup>F NMR (377 MHz, DMSO-*d*<sub>6</sub>) δ -83.8 (s, 3F), -112.7 (s, 2F); IR (film): 2917, 1598, 1569, 1409, 1334, 1185, 1125, 1103; HRMS Calculated For C<sub>11</sub>H<sub>8</sub>F<sub>5</sub>N<sub>2</sub>O [M+H]<sup>+</sup> 279.0557, found: 279.0551.

**3-(Perfluoroethyl)-1-(*p*-tolyl)-1H-pyrazol-5-ol (1j):** Pale yellow solid; mp = 209-210 °C, yield 60%; <sup>1</sup>H NMR (400 MHz, DMSO-*d*<sub>6</sub>) δ 12.41 (br, 1H), 7.59 (d, *J* = 8.2 Hz, 2H), 7.30 (d, *J* = 8.2 Hz, 2H), 5.93 (s, 1H), 2.34 (s, 3H); <sup>13</sup>C NMR (100 MHz, DMSO-*d*<sub>6</sub>) δ 154.2, 139.2 (t, *J*<sub>C-F</sub> = 28 Hz), 137.2, 135.8, 129.9, 122.6, 119.4 (qt, *J*<sub>C-F</sub> = 286 Hz, 38 Hz), 111.2 (tq, *J*<sub>C-F</sub> = 249 Hz, 38 Hz), 87.0, 20.9; <sup>19</sup>F NMR (377 MHz, DMSO-*d*<sub>6</sub>) δ -83.6 (s, 3F), -112.4 (s, 2F); IR (film): 3115, 2955, 1591, 1565, 1523, 1486, 1408,

1336, 1227, 1192, 1138, 1112, 1044; HRMS Calculated For C<sub>12</sub>H<sub>10</sub>F<sub>3</sub>N<sub>2</sub>O [M+H]<sup>+</sup> 293.0713, found: 293.0708.

**4-Methyl-1-phenyl-3-(trifluoromethyl)-1H-pyrazol-5-ol (3a):** Pale yellow solid; mp = 148-149 °C, yield 58%; <sup>1</sup>H NMR (400 MHz, DMSO-*d*<sub>6</sub>) δ 11.51 (br, 1H), 7.69 (d, *J* = 7.3 Hz, 2H), 7.51 (t, *J* = 7.8 Hz, 2H), 7.38 (t, *J* = 7.3 Hz, 1H), 2.03 (s, 3H); <sup>13</sup>C NMR (100 MHz, DMSO-*d*<sub>6</sub>) δ 151.2, 139.4 (q, *J*<sub>C-F</sub> = 36 Hz), 138.4, 129.6, 127.6, 122.9, 122.5 (q, *J*<sub>C-F</sub> = 268 Hz), 96.1, 6.7; <sup>19</sup>F NMR (377 MHz, DMSO-*d*<sub>6</sub>) δ -61.4 (s, 3F); IR (film): 2924, 1597, 1579, 1543, 1487, 1455, 1394, 1263, 1151; HRMS Calculated For C<sub>11</sub>H<sub>10</sub>F<sub>3</sub>N<sub>2</sub>O [M+H]<sup>+</sup> 243.0745, found: 243.0740.

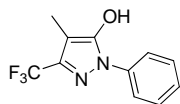

**4-Methyl-1-*p*-tolyl-3-(trifluoromethyl)-1H-pyrazol-5-ol (3b):** Pale yellow solid; mp = 170-171 °C, yield 68%; <sup>1</sup>H NMR (400 MHz, DMSO-*d*<sub>6</sub>) δ 11.44 (br, 1H), 7.55 (d, *J* = 8.1 Hz, 2H), 7.30 (d, *J* = 7.9 Hz, 2H), 2.35 (s, 3H), 2.02 (s, 3H); <sup>13</sup>C NMR (100 MHz, DMSO-*d*<sub>6</sub>) δ 151.0, 139.0 (q, *J*<sub>C-F</sub> = 36 Hz), 137.1, 136.0, 129.9, 122.9, 122.5 (q, *J*<sub>C-F</sub> = 267 Hz), 96.0, 21.0, 6.7; <sup>19</sup>F NMR (377 MHz, DMSO-*d*<sub>6</sub>) δ -61.3 (s, 3F); IR (film): 2922, 1595, 1396, 1280, 1164, 1120, 1052; HRMS Calculated For C<sub>12</sub>H<sub>12</sub>F<sub>3</sub>N<sub>2</sub>O [M+H]<sup>+</sup> 257.0902, found: 257.0896.

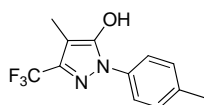

**4-Ethyl-1-phenyl-3-(trifluoromethyl)-1H-pyrazol-5-ol (3c):** Pale yellow solid; mp = 140-141 °C, yield 48%; <sup>1</sup>H NMR (400 MHz, DMSO-*d*<sub>6</sub>) δ 11.46 (br, 1H), 7.71-7.68 (m, 2H), 7.53-7.49 (m, 2H), 7.40-7.36 (m, 1H), 2.50-2.48 (m, 2H), 1.10 (t, *J* = 7.4 Hz, 3H); <sup>13</sup>C NMR (100 MHz, DMSO-*d*<sub>6</sub>) δ 150.8, 138.7 (q, *J*<sub>C-F</sub> = 35 Hz), 138.3, 129.5, 127.7, 123.0, 122.6 (q, *J*<sub>C-F</sub> = 268 Hz), 103.1, 15.7, 15.0; <sup>19</sup>F NMR (377 MHz, DMSO-*d*<sub>6</sub>) δ -60.9 (s, 3F); IR (film): 2978, 2872, 1594, 1565, 1477, 1393, 1312, 1266, 1152, 1073; HRMS Calculated For C<sub>12</sub>H<sub>12</sub>F<sub>3</sub>N<sub>2</sub>O [M+H]<sup>+</sup> 257.0902, found: 257.0896.

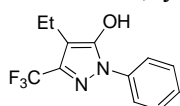

**4-Ethyl-1-*p*-tolyl-3-(trifluoromethyl)-1H-pyrazol-5-ol (3d):** Pale yellow solid; mp = 153-154 °C, yield 68%; <sup>1</sup>H NMR (400 MHz, DMSO-*d*<sub>6</sub>) δ 11.34 (br, 1H), 7.59 (d, *J* = 8.3 Hz, 2H), 7.29 (d, *J* = 8.3 Hz, 2H), 2.55-2.49 (m, 2H), 2.34 (s, 3H), 1.12 (t, *J* = 7.5 Hz, 3H); <sup>13</sup>C NMR (100 MHz, DMSO-*d*<sub>6</sub>) δ 150.7, 138.6 (q, *J*<sub>C-F</sub> = 35 Hz), 137.0, 136.1, 129.8, 122.8, 122.6 (q, *J*<sub>C-F</sub> = 267 Hz), 103.1, 20.9, 15.6, 15.0; <sup>19</sup>F NMR (377 MHz, DMSO-*d*<sub>6</sub>) δ -61.0 (s, 3F); IR (film): 2978, 2937, 1593, 1527, 1521, 14901, 1396, 1314, 1287, 1159, 1075; HRMS Calculated For C<sub>13</sub>H<sub>14</sub>F<sub>3</sub>N<sub>2</sub>O [M+H]<sup>+</sup> 271.1058, found: 271.1053.

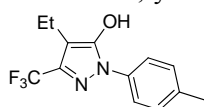

**4-Ethyl-1-*m*-tolyl-3-(trifluoromethyl)-1H-pyrazol-5-ol (3e):** Pale yellow solid; mp = 118-119 °C, yield 63%; <sup>1</sup>H NMR (400 MHz, DMSO-*d*<sub>6</sub>) δ 11.37 (br, 1H), 7.53 (d, *J* = 7.6 Hz, 2H), 7.37 (t, *J* = 7.4 Hz, 1H), 7.17 (d, *J* = 7.0 Hz, 1H), 2.53 (q, *J* = 7.2 Hz, 2H), 2.37 (s, 3H), 1.13 (t, *J* = 7.1 Hz, 3H); <sup>13</sup>C NMR (100 MHz, DMSO-*d*<sub>6</sub>) δ 150.8, 139.1, 138.6 (t, *J*<sub>C-F</sub> = 28 Hz), 138.3, 129.3, 128.3, 123.5, 122.3 (q, *J*<sub>C-F</sub> = 268 Hz), 120.1, 103.1, 21.4, 15.7, 15.0; <sup>19</sup>F NMR (377 MHz, DMSO-*d*<sub>6</sub>) δ -61.0 (s, 3F); IR (film): 2966, 2917, 1573, 1483, 1390, 1286, 1162, 1112, 1076; HRMS Calculated For C<sub>13</sub>H<sub>14</sub>F<sub>3</sub>N<sub>2</sub>O [M+H]<sup>+</sup> 271.1058, found: 271.1053.

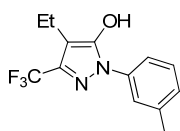

**1-Phenyl-4-propyl-3-(trifluoromethyl)-1H-pyrazol-5-ol (3f):** Pale yellow solid; mp = 123-124 °C, yield 48%; <sup>1</sup>H NMR (400 MHz, DMSO-*d*<sub>6</sub>) δ 11.42 (br, 1H), 7.70 (d, *J* = 8.2 Hz, 2H), 7.51 (t, *J* = 7.8 Hz, 2H), 7.38 (t, *J* = 7.4 Hz, 1H), 2.44 (t, *J* = 7.6 Hz, 2H), 1.53–1.49 (m, 2H), 0.91 (t, *J* = 7.3 Hz, 3H); <sup>13</sup>C NMR (100 MHz, DMSO-*d*<sub>6</sub>) δ 151.1, 139.0 (q, *J*<sub>C-F</sub> = 35 Hz), 138.4, 129.5, 127.6, 122.9, 122.6 (q, *J*<sub>C-F</sub> = 267 Hz), 101.5, 23.8, 23.6, 14.1; <sup>19</sup>F NMR (377 MHz, DMSO-*d*<sub>6</sub>) δ -60.7 (s, 3F); IR (film): 3243, 2856, 2414, 1593, 1570, 1481, 1456, 1400, 1270, 1137, 1084; HRMS Calculated For C<sub>13</sub>H<sub>14</sub>F<sub>3</sub>N<sub>2</sub>O [M+H]<sup>+</sup> 271.1058, found: 271.1053.

**4-Benzyl-1-phenyl-3-(trifluoromethyl)-1H-pyrazol-5-ol (3g):** Pale yellow solid; mp = 147-148 °C, yield 23%; <sup>1</sup>H NMR (400 MHz, DMSO-*d*<sub>6</sub>) δ 11.78 (br, 1H), 7.76–7.72 (m, 2H), 7.55–7.51 (m, 2H), 7.42–7.38 (m, 1H), 7.31–7.27 (m, 2H), 7.20–7.16 (m, 3H), 3.89 (s, 2H); <sup>13</sup>C NMR (100 MHz, DMSO-*d*<sub>6</sub>) δ 151.7, 140.6, 139.0 (q, *J*<sub>C-F</sub> = 36 Hz), 138.3, 129.6, 128.7, 128.2, 127.8, 126.4, 123.0, 122.4 (q, *J*<sub>C-F</sub> = 268 Hz), 99.9, 27.1; <sup>19</sup>F NMR (377 MHz, DMSO-*d*<sub>6</sub>) δ -60.7 (s, 3F); IR (film): 2917, 1595, 1577, 1536, 1457, 1390, 1275, 1132, 1028; HRMS Calculated For C<sub>17</sub>H<sub>14</sub>F<sub>3</sub>N<sub>2</sub>O [M+H]<sup>+</sup> 319.1058, found: 319.1053.

### 3. General Procedure for Hydrogenation of Disubstituted Fluorinated Pyrazol-5-ols 1a-1h

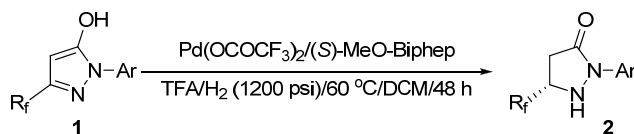

**General procedure:** (*S*)-MeO-Biphep (3.8 mg, 0.0066 mmol) and Pd(OCOCF<sub>3</sub>)<sub>2</sub> (2.0 mg, 0.006 mmol) were placed in a dried Schlenk tube under nitrogen atmosphere, and degassed anhydrous acetone was added. The mixture was stirred at room temperature for 1 h, and then solvent was removed under vacuum to give the catalyst. In a glovebox, pyrazol-5-ol **1** (0.30 mmol) and the above catalyst together with dichloromethane (2 mL) were stirred at room temperature for 1 min. Subsequently, trifluoroacetic acid (TFA, 34.2 mg, 22.3 μL, 0.3 mmol) was added to the reaction mixture. The hydrogenation was performed at 60 °C under H<sub>2</sub> (1200 psi) in a stainless steel autoclave for 48 h. After carefully releasing the hydrogen, the resulting mixture was concentrated under vacuum and dissolved in saturated aqueous sodium bicarbonate (5 mL). After stirring for 10 min, the mixture was extracted with dichloromethane and dried over sodium sulfate. After purification by silica gel chromatography using petroleum ether/dichloromethane (1:1) as eluent, the enantiomeric excess of the products were determined by HPLC with chiral column.

**(*S*)-2-Phenyl-5-(trifluoromethyl)pyrazolidin-3-one (2a):** Pale yellow solid; mp = 104-105 °C, yield 94%, 96% ee, [α]<sub>D</sub><sup>20</sup> = +20.0 (*c* 0.50, CHCl<sub>3</sub>); <sup>1</sup>H NMR (400 MHz, CDCl<sub>3</sub>) δ 7.77 (d, *J* = 8.1 Hz, 2H), 7.36 (t, *J* = 7.9 Hz, 2H), 7.16 (t, *J* = 7.4 Hz, 1H), 5.15 (d, *J* = 7.3 Hz, 1H), 4.13–4.02 (m, 1H), 3.18 (dd, *J* = 17.5, 9.7 Hz, 1H), 2.84 (dd, *J* = 17.6, 3.1 Hz, 1H); <sup>13</sup>C NMR (100 MHz, CDCl<sub>3</sub>) δ 167.5, 137.8, 128.9, 125.4 (q, *J*<sub>C-F</sub> = 278 Hz), 125.2, 118.9, 53.9 (q, *J*<sub>C-F</sub> = 32 Hz), 33.7; <sup>19</sup>F NMR (377 MHz, CDCl<sub>3</sub>) δ -78.4 (s, 3F); IR (film): 3257, 2919, 1597, 1494, 1464, 1316, 1188; HRMS Calculated For C<sub>10</sub>H<sub>10</sub>F<sub>3</sub>N<sub>2</sub>O [M+H]<sup>+</sup> 231.0745, found: 231.0740; HPLC (AD-H, elute: Hexanes/*i*-PrOH = 70/30, detector: 254 nm, flow rate: 0.7 mL/min), *t*<sub>1</sub> = 6.2 min (maj), *t*<sub>2</sub> = 7.5 min.

**(+)-2-*o*-Tolyl-5-(trifluoromethyl)pyrazolidin-3-one (2b):** Pale yellow solid; mp = 104-105 °C, yield 67%, 82% ee,  $[\alpha]_D^{20} = +18.4$  (*c* 0.50, CHCl<sub>3</sub>); <sup>1</sup>H NMR (400 MHz, CDCl<sub>3</sub>) δ 7.34–7.25 (m, 4H), 5.17 (d, *J* = 7.4 Hz, 1H), 4.15 (d, *J* = 7.1 Hz, 1H), 3.23–3.16 (m, 1H), 2.89–2.83 (m, 1H), 2.30 (s, 3H); <sup>13</sup>C NMR (100 MHz, CDCl<sub>3</sub>) δ 167.3, 135.4, 135.3, 131.3, 128.7, 126.8, 126.4, 125.8 (q, *J*<sub>C-F</sub> = 277 Hz), 54.4 (q, *J*<sub>C-F</sub> = 32 Hz), 32.3, 18.2; <sup>19</sup>F NMR (377 MHz, CDCl<sub>3</sub>) δ -78.0 (s, 3F); IR (film): 2940, 1698, 1534, 1471, 1350, 1234, 1165; HRMS Calculated For C<sub>11</sub>H<sub>12</sub>F<sub>3</sub>N<sub>2</sub>O [M+H]<sup>+</sup> 245.0902, found: 245.0896; HPLC (AD-H, elute: Hexanes/*i*-PrOH = 80/20, detector: 254 nm, flow rate: 0.7 mL/min), t<sub>1</sub> = 8.0 min (maj), t<sub>2</sub> = 8.8 min.

**(+)-2-*m*-Tolyl-5-(trifluoromethyl)pyrazolidin-3-one (2c):** Pale yellow solid; mp = 89-90 °C, yield 93%, 95% ee,  $[\alpha]_D^{20} = +14.4$  (*c* 0.50, CHCl<sub>3</sub>); <sup>1</sup>H NMR (400 MHz, CDCl<sub>3</sub>) δ 7.57-7.50 (m, 2H), 7.26–7.20 (m, 1H), 6.97 (d, *J* = 7.7 Hz, 1H), 5.14 (br, 1H), 4.11–4.01 (m, 1H), 3.15 (dd, *J* = 17.5, 9.7 Hz, 1H), 2.82 (dd, *J* = 17.5, 3.1 Hz, 1H), 2.35 (s, 3H); <sup>13</sup>C NMR (100 MHz, CDCl<sub>3</sub>) δ 167.5, 138.9, 137.7, 128.7, 126.1, 125.5 (q, *J*<sub>C-F</sub> = 278 Hz), 119.5, 116.2, 53.8 (q, *J*<sub>C-F</sub> = 33 Hz), 33.8, 21.5; <sup>19</sup>F NMR (377 MHz, CDCl<sub>3</sub>) δ -78.4 (s, 3F); IR (film): 2920, 1707, 1604, 1491, 1353, 1278, 1170, 1126; HRMS Calculated For C<sub>11</sub>H<sub>12</sub>F<sub>3</sub>N<sub>2</sub>O [M+H]<sup>+</sup> 245.0902, found: 245.0896; HPLC (AD-H, elute: Hexanes/*i*-PrOH = 70/30, detector: 254 nm, flow rate: 0.7 mL/min), t<sub>1</sub> = 6.3 min (maj), t<sub>2</sub> = 8.4 min.

**(+)-2-*p*-Tolyl-5-(trifluoromethyl)pyrazolidin-3-one (2d):** Pale yellow solid; mp = 140-141 °C, yield 93%, 96% ee,  $[\alpha]_D^{20} = +15.0$  (*c* 0.50, CHCl<sub>3</sub>); <sup>1</sup>H NMR (400 MHz, CDCl<sub>3</sub>) δ 7.61 (d, *J* = 8.6 Hz, 2H), 7.14 (d, *J* = 8.4 Hz, 2H), 5.18 (d, *J* = 6.6 Hz, 1H), 4.04 (d, *J* = 6.7 Hz, 1H), 3.13 (dd, *J* = 17.5, 9.7 Hz, 1H), 2.79 (dd, *J* = 17.5, 3.1 Hz, 1H), 2.31 (s, 3H); <sup>13</sup>C NMR (100 MHz, CDCl<sub>3</sub>) δ 167.3, 135.3, 135.1, 129.4, 124.6 (q, *J*<sub>C-F</sub> = 278 Hz), 119.1, 53.9 (q, *J*<sub>C-F</sub> = 33 Hz), 33.7, 20.9; <sup>19</sup>F NMR (377 MHz, CDCl<sub>3</sub>) δ -78.5 (s, 3F); IR (film): 3156, 2937, 1707, 1510, 1138, 1170, 1123, 1041; HRMS Calculated For C<sub>11</sub>H<sub>12</sub>F<sub>3</sub>N<sub>2</sub>O [M+H]<sup>+</sup> 245.0902, found: 245.0896; HPLC (AD-H, elute: Hexanes/*i*-PrOH = 70/30, detector: 254 nm, flow rate: 0.7 mL/min), t<sub>1</sub> = 6.7 min (maj), t<sub>2</sub> = 8.4 min.

**(+)-2-(4-Methoxyphenyl)-5-(trifluoromethyl)pyrazolidin-3-one (2e):** Pale yellow solid; mp = 122-123 °C, yield 94%, 95% ee,  $[\alpha]_D^{20} = +15.6$  (*c* 0.50, CHCl<sub>3</sub>); <sup>1</sup>H NMR (400 MHz, CDCl<sub>3</sub>) δ 7.66 (d, *J* = 9.1 Hz, 2H), 6.90 (d, *J* = 9.1 Hz, 2H), 5.11 (d, *J* = 7.6 Hz, 1H), 4.13–4.07 (m, 1H), 3.80 (s, 3H), 3.19 (dd, *J* = 17.5, 9.7 Hz, 1H), 2.85 (dd, *J* = 17.5, 3.1 Hz, 1H); <sup>13</sup>C NMR (100 MHz, CDCl<sub>3</sub>) δ 167.0, 157.2, 131.0, 123.9 (q, *J*<sub>C-F</sub> = 278 Hz), 121.1, 114.1, 55.5, 53.9 (q, *J*<sub>C-F</sub> = 33 Hz), 33.5; <sup>19</sup>F NMR (377 MHz, CDCl<sub>3</sub>) δ -78.4 (s, 3F); IR (film): 2931, 1796, 1551, 1449, 1256, 1211; HRMS Calculated For C<sub>11</sub>H<sub>12</sub>F<sub>3</sub>N<sub>2</sub>O<sub>2</sub> [M+H]<sup>+</sup> 261.0851, found: 261.0845; HPLC (AD-H, elute: Hexanes/*i*-PrOH = 70/30, detector: 254 nm, flow rate: 0.7 mL/min), t<sub>1</sub> = 7.7 min (maj), t<sub>2</sub> = 8.8 min.

**(+)-2-(3-Chlorophenyl)-5-(trifluoromethyl)pyrazolidin-3-one (2f):** Pale yellow solid; mp = 115-116 °C, yield 89%, 95% ee,  $[\alpha]_D^{20} = +16.6$  (*c* 0.50, CHCl<sub>3</sub>); <sup>1</sup>H NMR (400 MHz, CDCl<sub>3</sub>) δ 7.83 (s, 1H), 7.73 (d, *J* = 8.4 Hz, 1H), 7.31-7.26 (m, 1H), 7.13 (d, *J* = 8.0 Hz, 1H), 5.16 (d, *J* = 7.4 Hz, 1H), 4.16–4.10 (m, 1H), 3.22 (dd, *J* = 17.5, 9.7 Hz, 1H), 2.87 (dd, *J* = 17.5, 3.1 Hz, 1H); <sup>13</sup>C NMR (100 MHz, CDCl<sub>3</sub>) δ 167.9, 138.9, 134.7, 129.9, 125.1, 124.5 (q, *J*<sub>C-F</sub> = 278 Hz), 118.7, 116.6, 54.0 (q, *J*<sub>C-F</sub> = 33 Hz), 33.8; <sup>19</sup>F NMR (377 MHz, CDCl<sub>3</sub>) δ -78.4 (s, 3F); IR (film): 3227, 2925, 1726, 1592, 1547, 1482, 1254, 1171, 1125;

HRMS Calculated For C<sub>10</sub>H<sub>9</sub>ClF<sub>3</sub>N<sub>2</sub>O [M+H]<sup>+</sup> 265.0356, found: 265.0350; HPLC (AD-H, elute: Hexanes/*i*-PrOH = 70/30, detector: 254 nm, flow rate: 0.7 mL/min), t<sub>1</sub> = 6.0 min (maj), t<sub>2</sub> = 7.1 min.

**(+)-2-(3,4-Dichlorophenyl)-5-(trifluoromethyl)pyrazolidin-3-one (2g):** Pale yellow solid; mp = 122-123 °C, yield 90%, 93% ee, [α]<sub>D</sub><sup>20</sup> = +5.8 (*c* 0.50, CHCl<sub>3</sub>); <sup>1</sup>H NMR (400 MHz, CDCl<sub>3</sub>) δ 7.93 (d, *J* = 2.5 Hz, 1H), 7.70–7.67 (m, 1H), 7.39 (d, *J* = 8.9 Hz, 1H), 5.20 (d, *J* = 7.3 Hz, 1H), 4.17–4.10 (m, 1H), 3.21 (dd, *J* = 17.7, 9.6 Hz, 1H), 2.85 (dd, *J* = 17.7, 2.8 Hz, 1H); <sup>13</sup>C NMR (100 MHz, CDCl<sub>3</sub>) δ 168.0, 137.2, 132.8, 130.5, 128.3, 124.3 (q, *J*<sub>C-F</sub> = 278 Hz), 120.1, 117.7, 54.0 (q, *J*<sub>C-F</sub> = 33 Hz), 33.7; <sup>19</sup>F NMR (377 MHz, CDCl<sub>3</sub>) δ -78.4 (s, 3F); IR (film): 3235, 2960, 1715, 1556, 1503, 1355, 1259, 1170, 1106; HRMS Calculated For C<sub>10</sub>H<sub>8</sub>Cl<sub>2</sub>F<sub>3</sub>N<sub>2</sub>O [M+H]<sup>+</sup> 298.9966, found: 298.9960; HPLC (AD-H, elute: Hexanes/*i*-PrOH = 85/15, detector: 254 nm, flow rate: 0.7 mL/min), t<sub>1</sub> = 9.1 min (maj), t<sub>2</sub> = 10.1 min.

**(+)-2-(4-Fluorophenyl)-5-(trifluoromethyl)pyrazolidin-3-one (2h):** Pale yellow solid; mp = 111-112 °C, yield 93%, 94% ee, [α]<sub>D</sub><sup>20</sup> = +21.4 (*c* 0.50, CHCl<sub>3</sub>); <sup>1</sup>H NMR (400 MHz, CDCl<sub>3</sub>) δ 7.77–7.73 (m, 2H), 7.07–7.02 (m, 2H), 5.16 (d, *J* = 7.4 Hz, 1H), 4.15–4.08 (m, 1H), 3.21 (dd, *J* = 17.6, 9.7 Hz, 1H), 2.85 (dd, *J* = 17.6, 2.8 Hz, 1H); <sup>13</sup>C NMR (100 MHz, CDCl<sub>3</sub>) δ 167.4, 159.9 (d, *J*<sub>C-F</sub> = 245 Hz), 133.9, 123.6 (q, *J*<sub>C-F</sub> = 275 Hz), 120.8 (d, *J*<sub>C-F</sub> = 8.0 Hz), 115.6 (d, *J*<sub>C-F</sub> = 23 Hz), 53.9 (q, *J*<sub>C-F</sub> = 32 Hz), 33.6; <sup>19</sup>F NMR (377 MHz, CDCl<sub>3</sub>) δ -78.5 (s, 3F), 116.6 (s, 1F); IR (film): 2926, 1721, 1549, 1509, 1353, 1254, 1125, 1006; HRMS Calculated For C<sub>10</sub>H<sub>9</sub>F<sub>4</sub>N<sub>2</sub>O [M+H]<sup>+</sup> 249.0651, found: 249.0646; HPLC (OJ-H, elute: Hexanes/*i*-PrOH = 70/30, detector: 254 nm, flow rate: 0.7 mL/min), t<sub>1</sub> = 6.9 min (maj), t<sub>2</sub> = 7.4 min.

#### 4. General Procedure for Hydrogenation of Disubstituted Fluorinated Pyrazol-5-ols 1i, 1j and Trisubstituted Fluorinated Pyrazol-5-ols 3

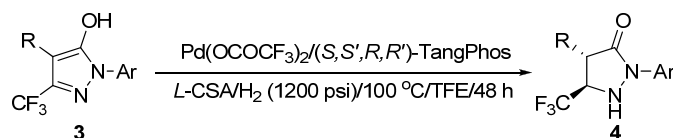

**General procedure:** (*S,S',R,R'*)-TangPhos (3.0 mg, 0.00104 mmol) and Pd(OCOCF<sub>3</sub>)<sub>2</sub> (2.7 mg, 0.008 mmol) were placed in a dried Schlenk tube under nitrogen atmosphere, and degassed anhydrous acetone was added. The mixture was stirred at room temperature for 1 h, and then solvent was removed under vacuum to give the catalyst. In a glovebox, pyrazol-5-ol **3** (0.2 mmol) and the above catalyst together with trifluoroethanol (TFE, 2 mL) were stirred in 1 mL solvent at room temperature for 1 min. Subsequently, *L*-CSA (46.4 mg, 0.2 mmol) was added to the reaction mixture. The hydrogenation was performed at 100 °C under H<sub>2</sub> (1200 psi) in a stainless steel autoclave for 48 h. After carefully releasing the hydrogen, the resulting mixture was concentrated under vacuum and dissolved in saturated aqueous sodium bicarbonate (5 mL). After stirring for 10 min, the mixture was extracted with dichloromethane and dried over sodium sulfate. After purification by silica gel chromatography using petroleum ether/ dichloromethane (1:1) as eluent, the enantiomeric excess of the products were determined by HPLC with chiral column.

**(-)-5-(Perfluoroethyl)-2-phenylpyrazolidin-3-one (2i):** Pale yellow solid; mp = 120-121 °C, yield 95%, 94% ee,  $[\alpha]_D^{20} = -8.4$  (*c* 0.50, CHCl<sub>3</sub>); <sup>1</sup>H NMR (400 MHz, CDCl<sub>3</sub>) δ 7.77 (d, *J* = 7.8 Hz, 2H), 7.36 (t, *J* = 8.0 Hz, 2H), 7.16 (t, *J* = 7.4 Hz, 1H), 5.08 (d, *J* = 7.9 Hz, 1H), 4.27–4.17 (m, 1H), 3.16 (dd, *J* = 17.5, 9.3 Hz, 1H), 2.96 (dd, *J* = 17.4, 4.0 Hz, 1H); <sup>13</sup>C NMR (100 MHz, CDCl<sub>3</sub>) δ 167.7, 137.80, 128.9, 125.2, 118.7, 52.8 (dd, *J*<sub>C-F</sub> = 29.0, 21.8 Hz), 33.3; <sup>19</sup>F NMR (377 MHz, CDCl<sub>3</sub>) δ -81.7 (s, 3F) -121.6 (d, *J* = 278 Hz), -131.1 (d, *J* = 278 Hz); IR (film): 3243, 2938, 2852, 1684, 1592, 1547, 1496, 1367, 1213, 1127; HRMS Calculated For C<sub>11</sub>H<sub>10</sub>F<sub>5</sub>N<sub>2</sub>O [M+H]<sup>+</sup> 281.0713, found: 281.0708; HPLC (AD-H, elute: Hexanes/*i*-PrOH = 70/30, detector: 254 nm, flow rate: 0.7 mL/min), *t*<sub>1</sub> = 5.6 min, *t*<sub>2</sub> = 7.0 min (maj).

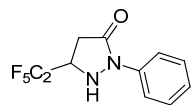

**(-)-5-(Perfluoroethyl)-2-(*p*-tolyl)pyrazolidin-3-one (2j):** Pale yellow solid; mp = 153-154 °C, yield 92%, 95% ee,  $[\alpha]_D^{20} = -5.8$  (*c* 0.50, CHCl<sub>3</sub>); <sup>1</sup>H NMR (400 MHz, CDCl<sub>3</sub>) δ 7.63 (d, *J* = 8.5 Hz, 2H), 7.15 (d, *J* = 8.3 Hz, 2H), 5.06 (d, *J* = 7.9 Hz, 1H), 4.26–4.13 (m, 1H), 3.14 (dd, *J* = 17.4, 9.4 Hz, 1H), 2.94 (dd, *J* = 17.4, 3.9 Hz, 1H), 2.32 (s, 3H); <sup>13</sup>C NMR (100 MHz, CDCl<sub>3</sub>) δ 167.4, 135.3, 135.0, 129.4, 118.8, 52.8 (dd, *J* = 29.0, 21.8 Hz), 33.2, 20.9; <sup>19</sup>F NMR (377 MHz, CDCl<sub>3</sub>) δ -81.7 (s, 3F), -121.7 (d, *J* = 278 Hz, 1F), -131.0 (d, *J* = 278 Hz, 1F); IR (film): 3259, 2923, 2862, 1695, 1550, 1510, 1348, 1216, 1125; HRMS Calculated For C<sub>12</sub>H<sub>12</sub>F<sub>5</sub>N<sub>2</sub>O [M+H]<sup>+</sup> 295.0870, found: 295.0864; HPLC (OG-H, elute: Hexanes/*i*-PrOH = 90/10, detector: 254 nm, flow rate: 0.7 mL/min), *t*<sub>1</sub> = 14.8 min, *t*<sub>2</sub> = 17.1 min (maj).

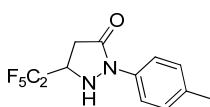

**(-)-4-Methyl-2-phenyl-5-(trifluoromethyl)pyrazolidin-3-one (4a):** Pale yellow solid; mp = 84-85 °C, yield 92%, 89% ee,  $[\alpha]_D^{20} = -28.4$  (*c* 0.50, CHCl<sub>3</sub>); <sup>1</sup>H NMR (400 MHz, CDCl<sub>3</sub>) δ 7.79 (d, *J* = 7.8 Hz, 2H), 7.36 (t, *J* = 8.0 Hz, 2H), 7.15 (t, *J* = 7.4 Hz, 1H), 5.02 (d, *J* = 8.8 Hz, 1H), 3.77–3.67 (m, 1H), 3.00–2.90 (m, 1H), 1.46 (d, *J* = 7.3 Hz, 3H); <sup>13</sup>C NMR (100 MHz, CDCl<sub>3</sub>) δ 170.4, 137.9, 128.9, 125.1, 124.6 (q, *J*<sub>C-F</sub> = 277 Hz), 118.7, 61.6 (q, *J*<sub>C-F</sub> = 31 Hz), 39.9, 14.8; <sup>19</sup>F NMR (377 MHz, CDCl<sub>3</sub>) δ -76.5 (s, 3F); IR (film): 2985, 2931, 1741, 1544, 1497, 1374, 1245, 1048; HRMS Calculated For C<sub>11</sub>H<sub>12</sub>F<sub>3</sub>N<sub>2</sub>O [M+H]<sup>+</sup> 245.0902, found: 245.0896; HPLC (AD-H, elute: Hexanes/*i*-PrOH = 70/30, detector: 254 nm, flow rate: 0.7 mL/min), *t*<sub>1</sub> = 5.5 min, *t*<sub>2</sub> = 6.2 min (maj).

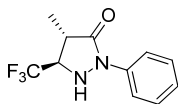

**(+)-4-Methyl-2-(*p*-tolyl)-5-(trifluoromethyl)pyrazolidin-3-one (4b):** Pale yellow oil; yield 97%, 88% ee,  $[\alpha]_D^{20} = +5.8$  (*c* 0.50, CHCl<sub>3</sub>); <sup>1</sup>H NMR (400 MHz, CDCl<sub>3</sub>) δ 7.66 (d, *J* = 8.1 Hz, 2H), 7.26–7.15 (m, 2H), 4.96 (d, *J* = 8.8 Hz, 1H), 3.75–3.68 (m, 1H), 3.00–2.92 (m, 1H), 2.33 (s, 3H), 1.45 (d, *J* = 7.3 Hz, 3H); <sup>13</sup>C NMR (100 MHz, CDCl<sub>3</sub>) δ 170.1, 135.4, 134.9, 129.4, 123.7 (q, *J*<sub>C-F</sub> = 278 Hz), 118.8, 61.6 (q, *J*<sub>C-F</sub> = 31 Hz), 39.8, 20.9, 14.9; <sup>19</sup>F NMR (377 MHz, CDCl<sub>3</sub>) δ -76.5 (s, 3F); IR (film): 3243, 2999, 2925, 1677, 1574, 1504, 1336, 1266, 1160; HRMS Calculated For C<sub>12</sub>H<sub>14</sub>F<sub>3</sub>N<sub>2</sub>O [M+H]<sup>+</sup> 259.1058, found: 259.1053; HPLC (AD-H, elute: Hexanes/*i*-PrOH = 70/30, detector: 254 nm, flow rate: 0.7 mL/min), *t*<sub>1</sub> = 6.0 min, *t*<sub>2</sub> = 6.9 min (maj).

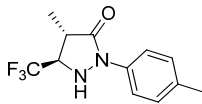

**(+)-4-Ethyl-2-phenyl-5-(trifluoromethyl)pyrazolidin-3-one (4c):** Pale yellow solid; mp = 58-59 °C, yield 93%, 94% ee,  $[\alpha]_D^{20} = +0.4$  (*c* 0.50, CHCl<sub>3</sub>); <sup>1</sup>H NMR (400 MHz, CDCl<sub>3</sub>) δ 7.78 (d, *J* = 7.8 Hz, 2H), 7.35 (t, *J* = 8.0 Hz, 2H), 7.14 (t, *J* = 7.4 Hz, 1H), 5.18 (d, *J* = 7.5 Hz, 1H), 3.76–3.71 (m, 1H), 2.76–2.73 (m, 1H), 1.96–1.94 (m, 1H), 1.79–1.75 (m, 1H), 1.08 (t, *J* = 7.4 Hz, 3H); <sup>13</sup>C NMR (100 MHz, CDCl<sub>3</sub>) δ 170.0, 137.9, 128.8, 125.1,

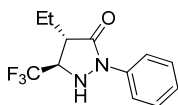



124.7 (q,  $J_{C-F}$  = 278 Hz), 119.0, 58.5 (q,  $J_{C-F}$  = 31 Hz), 46.3, 23.1, 11.1;  $^{19}\text{F}$  NMR (377 MHz,  $\text{CDCl}_3$ )  $\delta$  -77.7 (s, 3F); IR (film): 3241, 2972, 1687, 1593, 1494, 1359, 1281, 1172, 1145; HRMS Calculated For  $\text{C}_{12}\text{H}_{14}\text{F}_3\text{N}_2\text{O}$   $[\text{M}+\text{H}]^+$  259.1058, found: 259.1053; HPLC (AD-H, elute: Hexanes/*i*-PrOH = 70/30, detector: 254 nm, flow rate: 0.7 mL/min),  $t_1$  = 5.5 min,  $t_2$  = 6.4 min (maj).

**(+)-4-Ethyl-2-*p*-tolyl-5-(trifluoromethyl)pyrazolidin-3-one (4d):** Pale yellow solid; mp = 90-91 °C, yield 92%, 93% ee,  $[\alpha]_D^{20}$  = +2.0 (*c* 0.50,  $\text{CHCl}_3$ );  $^1\text{H}$  NMR (400 MHz,  $\text{CDCl}_3$ )  $\delta$  7.66 (d,

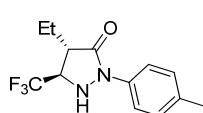

$J$  = 8.2 Hz, 2H), 7.16 (d,  $J$  = 8.1 Hz, 2H), 5.06 (d,  $J$  = 7.6 Hz, 1H), 3.76–3.72 (m, 1H), 2.79–2.76 (m, 1H), 2.32 (s, 3H), 2.01–1.90 (m, 1H), 1.84–1.78 (m, 1H), 1.10

(t,  $J$  = 7.3 Hz, 3H);  $^{13}\text{C}$  NMR (100 MHz,  $\text{CDCl}_3$ )  $\delta$  169.6, 135.4, 135.0, 129.4, 124.6 (q,  $J_{C-F}$  = 278 Hz), 119.0, 58.5 (q,  $J_{C-F}$  = 32 Hz), 46.2, 23.1, 20.9, 11.1;  $^{19}\text{F}$  NMR (377 MHz,  $\text{CDCl}_3$ )  $\delta$  -77.7 (s, 3F); IR (film): 3230, 2965, 2870, 1675, 1579, 1513, 1359, 1265, 1170, 1149; HRMS Calculated For  $\text{C}_{13}\text{H}_{16}\text{F}_3\text{N}_2\text{O}$   $[\text{M}+\text{H}]^+$  273.1215, found: 273.1209; HPLC (OG-H, elute: Hexanes/*i*-PrOH = 95/5, detector: 254 nm, flow rate: 0.7 mL/min),  $t_1$  = 18.6 min,  $t_2$  = 21.8 min (maj).

**(+)-4-Ethyl-2-*m*-tolyl-5-(trifluoromethyl)pyrazolidin-3-one (4e):** Pale yellow oil; yield 90%, 92% ee,  $[\alpha]_D^{20}$  = +0.4 (*c* 0.50,  $\text{CHCl}_3$ );  $^1\text{H}$  NMR (400 MHz,  $\text{CDCl}_3$ )  $\delta$  7.63–7.56 (m, 2H),

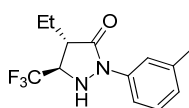

7.26–7.21 (m, 1H), 6.97 (d,  $J$  = 7.6 Hz, 1H), 5.06 (br, 1H), 3.75 (s, 1H), 2.80–2.75 (m, 1H), 2.36 (s, 3H), 2.00–1.91 (m, 1H), 1.83–1.76 (m, 1H), 1.10 (t,  $J$  = 7.4 Hz,

3H);  $^{13}\text{C}$  NMR (100 MHz,  $\text{CDCl}_3$ )  $\delta$  169.8, 138.8, 137.8, 128.7, 126.0, 124.9 (q,  $J_{C-F}$  = 278 Hz), 119.5, 116.1, 58.5 (q,  $J_{C-F}$  = 31 Hz), 46.3, 23.1, 21.5, 11.1;  $^{19}\text{F}$  NMR (377 MHz,  $\text{CDCl}_3$ )  $\delta$  -77.7 (s, 3F); IR (film): 3255, 2969, 1713, 1548, 1490, 1360, 1283, 1184, 1148; HRMS Calculated For  $\text{C}_{13}\text{H}_{16}\text{F}_3\text{N}_2\text{O}$   $[\text{M}+\text{H}]^+$  273.1215, found: 273.1209; HPLC (AD-H, elute: Hexanes/*i*-PrOH = 70/30, detector: 254 nm, flow rate: 0.7 mL/min),  $t_1$  = 5.4 min,  $t_2$  = 6.9 min (maj).

**(+)-2-Phenyl-4-propyl-5-(trifluoromethyl)pyrazolidin-3-one (4f):** Pale yellow solid; mp = 96-70 °C, yield 95%, 93% ee,  $[\alpha]_D^{20}$  = +2.6 (*c* 0.50,  $\text{CHCl}_3$ );  $^1\text{H}$  NMR (400 MHz,  $\text{CDCl}_3$ )  $\delta$  7.80 (d,

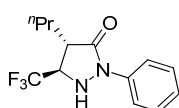

$J$  = 8.3 Hz, 2H), 7.36 (t,  $J$  = 7.9 Hz, 2H), 7.15 (t,  $J$  = 7.4 Hz, 1H), 5.08 (br, 1H), 3.77–3.73 (m, 1H), 2.86 (d,  $J$  = 3.1 Hz, 1H), 1.93–1.74 (m, 1H), 1.56–1.54 (m, 1H),

1.55–1.50 (m, 2H), 1.00 (t,  $J$  = 7.3 Hz, 3H);  $^{13}\text{C}$  NMR (100 MHz,  $\text{CDCl}_3$ )  $\delta$  170.2, 137.9, 128.8, 126.4 (q,  $J_{C-F}$  = 278 Hz), 125.1, 118.9, 58.9 (q,  $J_{C-F}$  = 32 Hz), 44.7, 31.9, 20.1, 13.6;  $^{19}\text{F}$  NMR (377 MHz,  $\text{CDCl}_3$ )  $\delta$  -77.8 (s, 3F); IR (film): 3237, 2972, 2870, 1714, 1551, 1504, 1354, 1279, 1177, 1157, 1014; HRMS Calculated For  $\text{C}_{13}\text{H}_{16}\text{F}_3\text{N}_2\text{O}$   $[\text{M}+\text{H}]^+$  273.1215, found: 273.1209; HPLC (AD-H, elute: Hexanes/*i*-PrOH = 70/30, detector: 254 nm, flow rate: 0.7 mL/min),  $t_1$  = 5.6 min,  $t_2$  = 7.2 min (maj).

**(4*S*,5*R*)-4-Benzyl-2-phenyl-5-(trifluoromethyl)pyrazolidin-3-one (4g):** Pale yellow solid; mp = 117-118 °C, yield 94%, 95% ee,  $[\alpha]_D^{20}$  = +122.6 (*c* 0.50,  $\text{CHCl}_3$ );  $^1\text{H}$  NMR (400 MHz,  $\text{CDCl}_3$ )

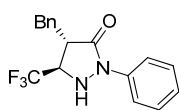

$\delta$  7.71 (d,  $J$  = 8.0 Hz, 2H), 7.37–7.25 (m, 7H), 7.15 (t,  $J$  = 7.4 Hz, 1H), 4.19 (s, 1H), 3.76–3.73 (m, 1H), 3.37–3.31 (m, 1H), 3.23–3.19 (m, 1H), 3.13–3.08 (m, 1H);  $^{13}\text{C}$

NMR (100 MHz,  $\text{CDCl}_3$ )  $\delta$  169.4, 137.6, 136.1, 129.1, 129.0, 128.8, 127.7, 125.3, 125.2 (q,  $J_{C-F}$  = 279 Hz), 119.1, 57.7 (q,  $J_{C-F}$  = 32 Hz), 45.7, 35.4;  $^{19}\text{F}$  NMR (377 MHz,  $\text{CDCl}_3$ )  $\delta$  -77.5 (s, 3F); IR (film): 3243, 3055, 2918, 1667, 1592, 1498, 1487, 1457, 1372, 1271, 1201, 1166, 1031; HRMS Calculated For  $\text{C}_{17}\text{H}_{16}\text{F}_3\text{N}_2\text{O}$   $[\text{M}+\text{H}]^+$  321.1215, found: 321.1209; HPLC (AD-H,

elute: Hexanes/*i*-PrOH = 70/30, detector: 254 nm, flow rate: 0.7 mL/min),  $t_1 = 6.5$  min (maj),  $t_2 = 7.1$  min.

## 5. Mechanistic Investigation

In order to further verify our hypothesis that the hydrogenation carried out *via* capture of the active tautomer, we synthesized three compounds (OH- form type **5**, NH- form type **6** and CH- form type **8**) and exposure them to hydrogenation reaction. 5-Methoxy-1-phenyl-3-(trifluoromethyl)-1*H*-pyrazole **5** and 1-methyl-2-phenyl-5-(trifluoro-methyl)-1*H*-pyrazol-3(2*H*)- one **6** were prepared according to the literature methods and their NMR data matched the literature data.<sup>[2,3]</sup> The 4,4-dimethyl-1-phenyl-3-(trifluoromethyl)-1*H*-pyrazol-5(4*H*)-one **8** was prepared following the literature report.<sup>[4]</sup>

### Synthesis of 4,4-Dimethyl-1-phenyl-3-(trifluoromethyl)-1*H*-pyrazol-5(4*H*)-one **8**

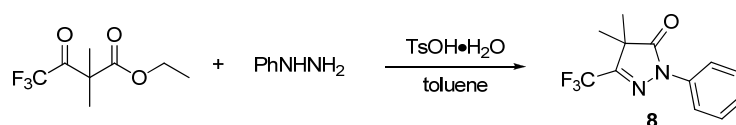

A solution of ethyl 4,4-trifluoro-2,2-dimethyl-3-oxobutanoate (0.849 g, 4.0 mmol) and phenylhydrazine (0.433 g, 4 mmol) in toluene (20 ml) was stirred and refluxed in the presence of a catalytic amount of *p*-toluenesulfonic acid monohydrate to remove water with a Dean-Stark apparatus. After 16 h reflux, the reaction mixture was concentrated under vacuum. The residue dissolved in acetic acid (5 ml) was refluxed for 4 h. After evaporation of the solvent, the residue was extracted with diethyl ether. The extract was washed successively with 3% hydrochloric acid, saturated aqueous sodium hydrogen carbonate and brine, and dried over sodium sulfate. The residue was purified by silica gel column chromatography (petroleum ester/CH<sub>2</sub>Cl<sub>2</sub> = 1/1) to afford a yellow oil: 0.261 g, 26% yield; <sup>1</sup>H NMR (400 MHz, CDCl<sub>3</sub>) δ 7.88–7.85 (m, 2H), 7.46–7.40 (m, 2H), 7.28–7.22 (m, 1H), 1.49 (s, 6H); <sup>13</sup>C NMR (100 MHz, CDCl<sub>3</sub>) δ 175.5, 153.1 (q,  $J_{C-F} = 37$  Hz), 137.3, 129.1, 126.2, 119.5 (q,  $J_{C-F} = 271$  Hz), 119.1, 48.8, 21.3; <sup>19</sup>F NMR (377 MHz, CDCl<sub>3</sub>) δ -65.1 (s, 3F); IR (film): 2964, 2892, 1650, 1408, 1319, 1251, 1216, 1049; HRMS Calculated For C<sub>12</sub>H<sub>12</sub>F<sub>3</sub>N<sub>2</sub>O [M+H]<sup>+</sup> 257.0902, found: 257.0896.

**General Procedure for Hydrogenation of Derivatives of Pyrazol-5-ols **5**, **6** and **8**:** (*S*)-MeO-Biphep (6.1 mg, 0.0104 mmol) and Pd(OCOCF<sub>3</sub>)<sub>2</sub> (2.7 mg, 0.008 mmol) were placed in a dried Schlenk tube under nitrogen atmosphere, and degassed anhydrous acetone was added. The mixture was stirred at room temperature for 1 h, and then solvent was removed under vacuum to give the catalyst. In a glovebox, **5**, **6** or **8** (0.2 mmol) and the above catalyst together with dichloromethane (2 mL) were stirred at room temperature for 1 min. Subsequently, trifluoroacetic acid (22.8 mg, 14.8 μL, 0.2 mmol) was added to the reaction mixture. The hydrogenation was performed at 60 °C under H<sub>2</sub> (1200 psi) in a stainless steel autoclave for 48 h. After carefully releasing the hydrogen, the resulting mixture was concentrated under vacuum and dissolved in saturated aqueous sodium bicarbonate (5 mL). After stirring for 10 min, the mixture was extracted with dichloromethane and dried over sodium sulfate. After purification by silica gel chromatography using petroleum ether/dichloromethane (1:1) as eluent, the enantiomeric excess of the products were determined by HPLC with chiral column.

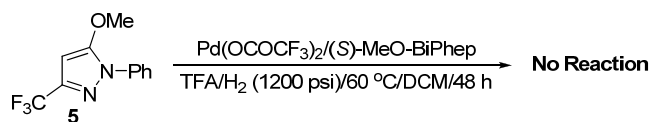

The exposure of the OH- form type substrate **5** with TFA in the presence of Pd(OCOCF<sub>3</sub>)<sub>2</sub>/(*S*)-MeO-BiPhep in dichloromethane failed to reaction.

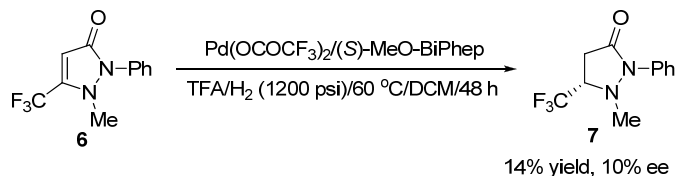

The NH-form type substrate **6** only obtained 10% ee with 14% yield. **(+)-1-Methyl-2-phenyl-5-(trifluoromethyl)pyrazolidin-3-one (7)**: Pale yellow oil; yield 14%, 10% ee,  $[\alpha]_{\text{D}}^{20} = +2.0$  (*c* 0.20, CHCl<sub>3</sub>); <sup>1</sup>H NMR (400 MHz, CDCl<sub>3</sub>) δ 7.72–7.68 (m, 2H), 7.41–7.35 (m, 2H), 7.21–7.16 (m, 1H), 3.68–3.60 (m, 1H), 3.40–3.33 (m, 1H), 2.77–2.72 (m, 4H); <sup>13</sup>C NMR (100 MHz, CDCl<sub>3</sub>) δ 166.6, 136.2, 129.0, 125.6, 124.0 (q, *J*<sub>C-F</sub> = 278 Hz), 120.5, 61.5 (q, *J*<sub>C-F</sub> = 31 Hz), 45.1, 30.6; <sup>19</sup>F NMR (377 MHz, CDCl<sub>3</sub>) δ -78.7 (s, 3F); IR (film): 3017, 2927, 2851, 1710, 1546, 1496, 1264, 1215, 1112; HRMS Calculated For C<sub>11</sub>H<sub>12</sub>F<sub>3</sub>N<sub>2</sub>O [M+H]<sup>+</sup> 245.0902, found: 245.0896; HPLC (OD-H, elute: Hexanes/*i*-PrOH = 90/10, detector: 254 nm, flow rate: 0.8 mL/min), *t*<sub>1</sub> = 9.2 min (maj), *t*<sub>2</sub> = 10.1 min.

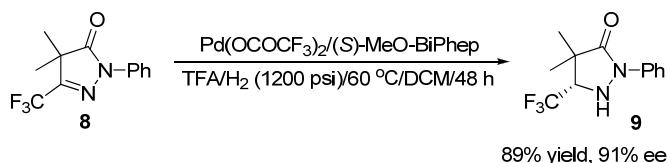

When employing the CH-form type **8** as the hydrogenation substrate, 91% ee and 89% yield was obtained. **(+)-4,4-Dimethyl-2-phenyl-5-(trifluoromethyl)pyrazolidin-3-one (9)**: Yield 89%, Pale yellow oil; 91% ee,  $[\alpha]_{\text{D}}^{20} = +3.0$  (*c* 0.20, CHCl<sub>3</sub>); <sup>1</sup>H NMR (400 MHz, CDCl<sub>3</sub>) δ 7.84–7.81 (m, 2H), 7.39–7.34 (m, 2H), 7.15 (t, *J* = 7.4 Hz, 1H), 4.95 (d, *J* = 8.8 Hz, 1H), 3.78–3.69 (m, 1H), 1.42 (s, 3H), 1.36–1.34 (m, 3H); <sup>13</sup>C NMR (100 MHz, CDCl<sub>3</sub>) δ 173.1, 138.2, 128.9, 125.4 (q, *J*<sub>C-F</sub> = 279 Hz), 124.9, 118.6, 64.6 (q, *J*<sub>C-F</sub> = 29 Hz), 44.2, 24.3, 18.3; <sup>19</sup>F NMR (377 MHz, CDCl<sub>3</sub>) δ -71.0 (s, 3F); IR (film): 3021, 2987, 2834, 1680, 1533, 1459, 1390, 1120; HRMS Calculated For C<sub>12</sub>H<sub>14</sub>F<sub>3</sub>N<sub>2</sub>O [M+H]<sup>+</sup> 259.1058, found: 259.1053; HPLC (OD-H, elute: Hexanes/*i*-PrOH = 90/10, detector: 254 nm, flow rate: 0.8 mL/min), *t*<sub>1</sub> = 11.2 min (maj), *t*<sub>2</sub> = 12.4 min.

Based on the experimental results and stereochemistry of the products, we proposed that the reaction experienced the process of Brønsted acid promoted tautomerization of the three tautomeric forms and then Pd-catalyzed asymmetric hydrogenation of the active tautomer **C** to give the optically active pyrazolidinones.

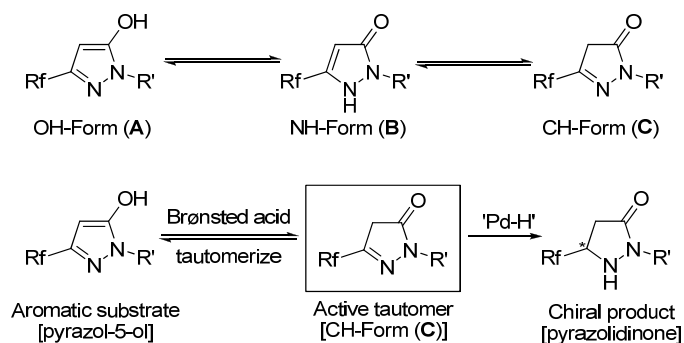

## 6. The X-ray Crystallographic Analysis of Substrate **3a** and Products

The configuration of fluorinated 4-methyl-1-phenyl-3-(trifluoromethyl)-1*H*-pyrazol-5-ol **3a** was determined by X-ray diffraction analysis. The CCDC1040656 contains detail supplementary crystallographic data for this paper. These can be obtained free of charge from The Cambridge Crystallographic Data Centre via [www.ccdc.cam.ac.uk](http://www.ccdc.cam.ac.uk).

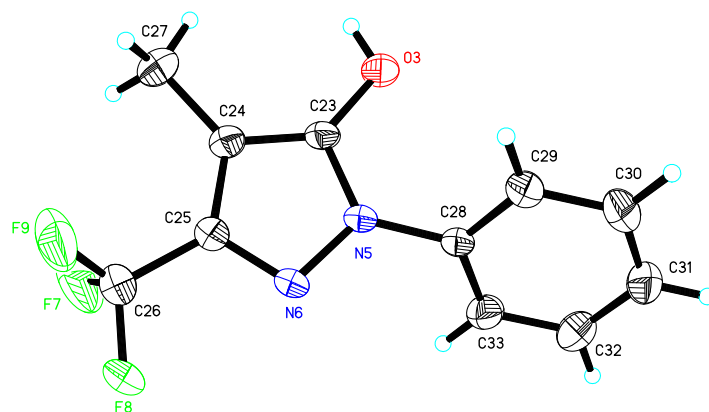

**Figure 1.** The X-ray structure of 4-methyl-1-phenyl-3-(trifluoromethyl)-1*H*-pyrazol-5-ol **3a**.

The absolute configuration of 2,5-disubstituted hydrogenation product **2a** was assigned as (*S*)-2-phenyl-5-(trifluoromethyl)pyrazolidin-3-one based on X-ray diffraction analysis after recrystallization from mixture solvent dichloromethane/*n*-hexane to upgrade ee to >99%. The configurations of the other chiral products are assigned by analogy. The CCDC1040657 contains detail supplementary crystallographic data for this paper. These can be obtained free of charge from The Cambridge Crystallographic Data Centre via [www.ccdc.cam.ac.uk](http://www.ccdc.cam.ac.uk).

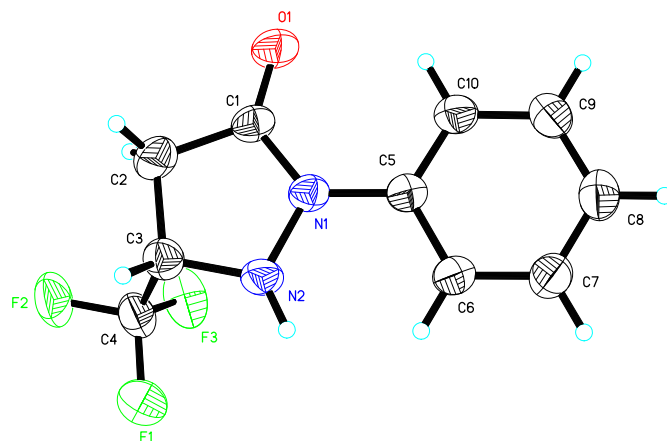

**Figure 2.** The X-ray structure of (*S*)-2-Phenyl-5-(trifluoromethyl)pyrazolidin-3-one **2a**.

The absolute configuration of 2,4,5-trisubstituted hydrogenation product **4g** was assigned as (4*S*,5*R*)-4-benzyl-2-phenyl-5-(trifluoromethyl)pyrazolidin-3-one based on X-ray diffraction analysis after recrystallization from mixture solvent dichloromethane/*n*-hexane to upgrade ee to >99%. The configurations of the other chiral products are assigned by analogy. The CCDC 1040658 contains detail supplementary crystallographic data for this paper. These can be obtained free of charge from The Cambridge Crystallographic Data Centre via [www.ccdc.cam.ac.uk](http://www.ccdc.cam.ac.uk).

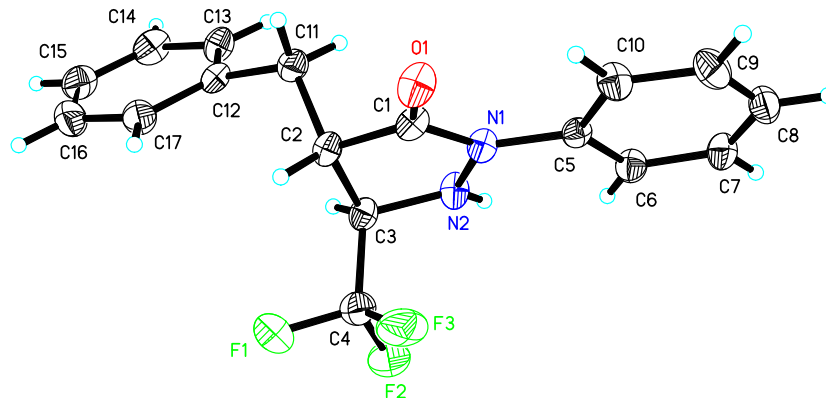

**Figure 3.** X-ray structure of (4*S*,5*R*)-4-benzyl-2-phenyl-5-(trifluoromethyl)pyrazolidin-3-one **4g**.

## 7. References

- [1] J. Zhang, S. Yang, K. Zhang, J. Chen, H. Deng, M. Shao, H. Zhang, W. Cao, *Tetrahedron* **2012**, *9*, 2121.
- [2] S. Bieringer, W. Holzer, *Heterocycles* **2006**, *68*, 1825.
- [3] G. Grillot, S. Aftergut, D. Botteron, *J. Org. Chem.* **1958**, *23*, 119.
- [4] T. Tada, M. Motoki, N. Takahashi, T. Miyata, T. Takechi, T. Uchida, Y. Takagi, *Pesticide Science* **1996**, *2*, 165.

## 8. Copy of NMR of Substrates and Products

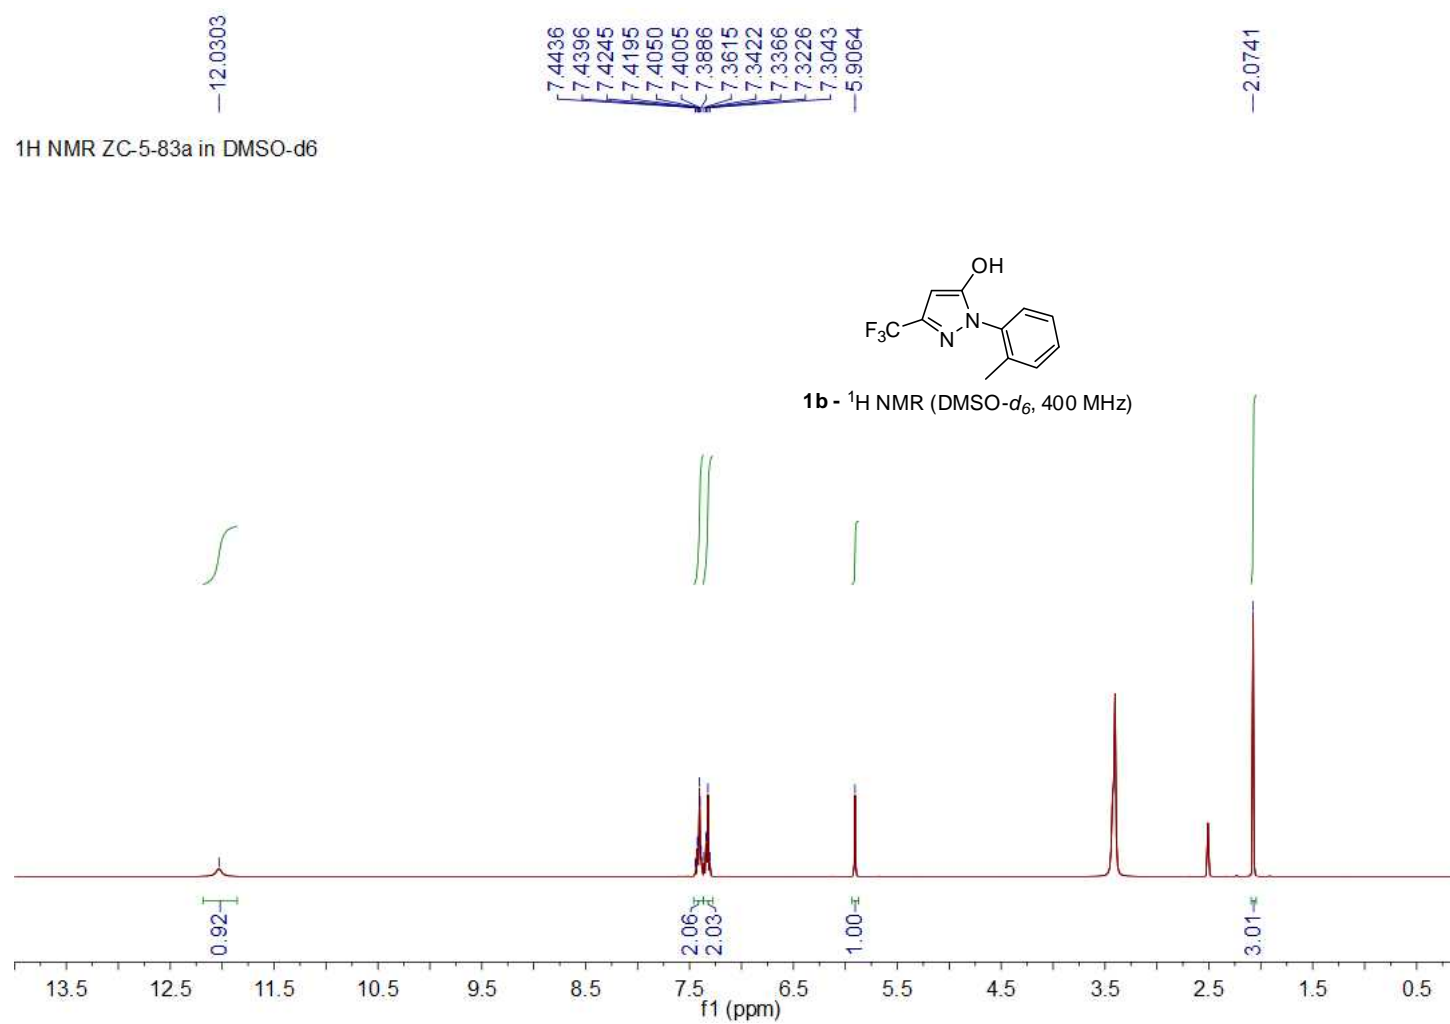

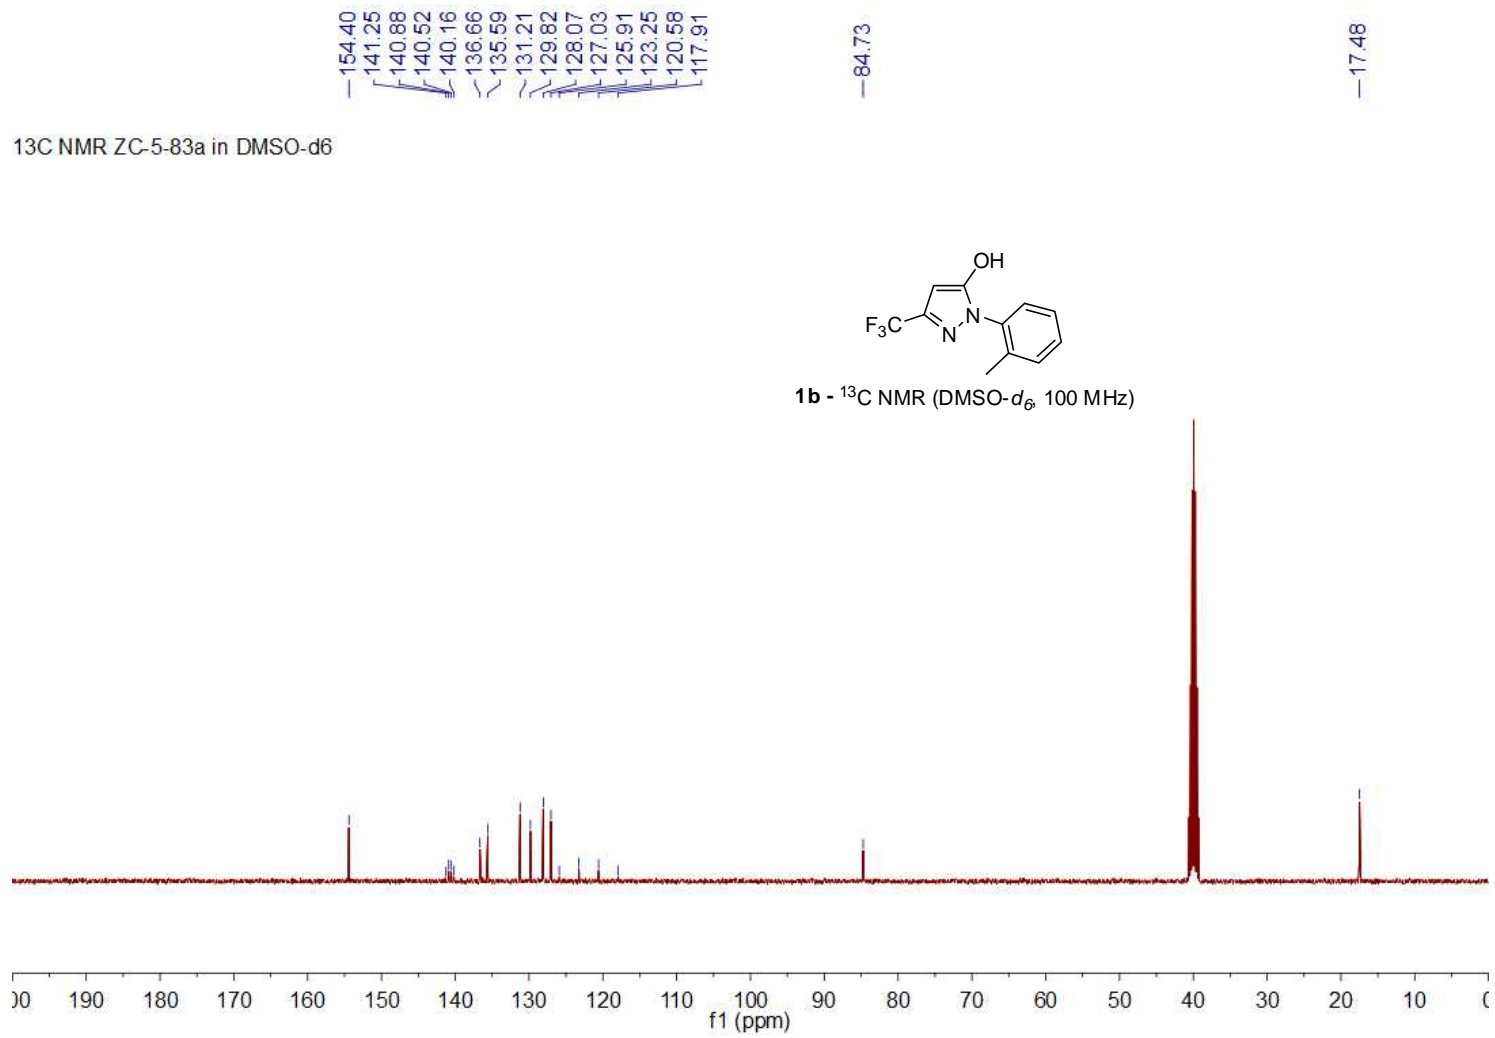

<sup>19</sup>F NMR ZC-5-83a in DMSO-d<sub>6</sub>

-61.60

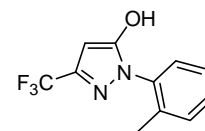

**1b** - <sup>19</sup>F NMR (DMSO-*d*<sub>6</sub>, 377 MHz)

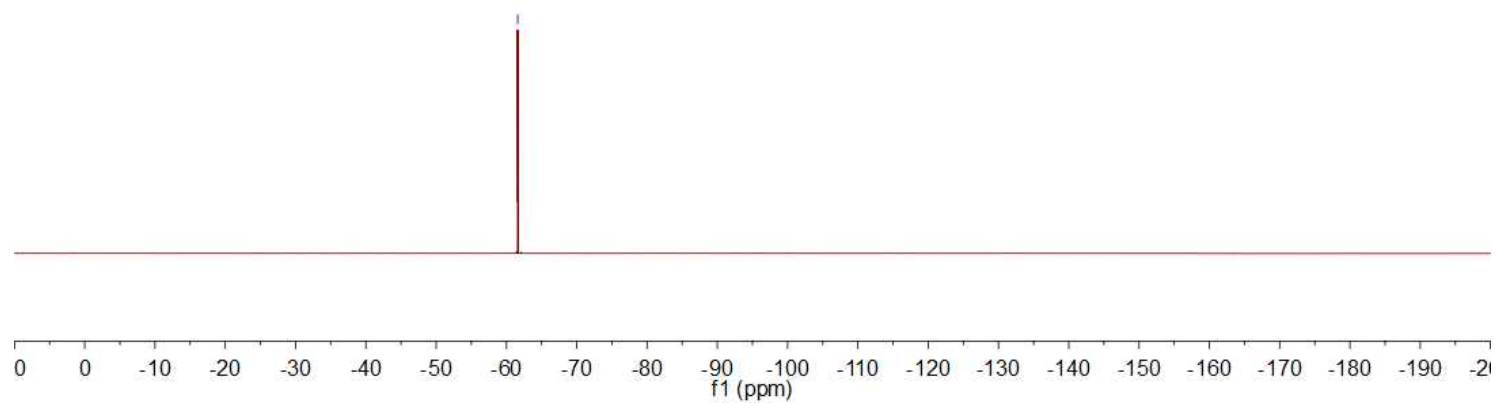



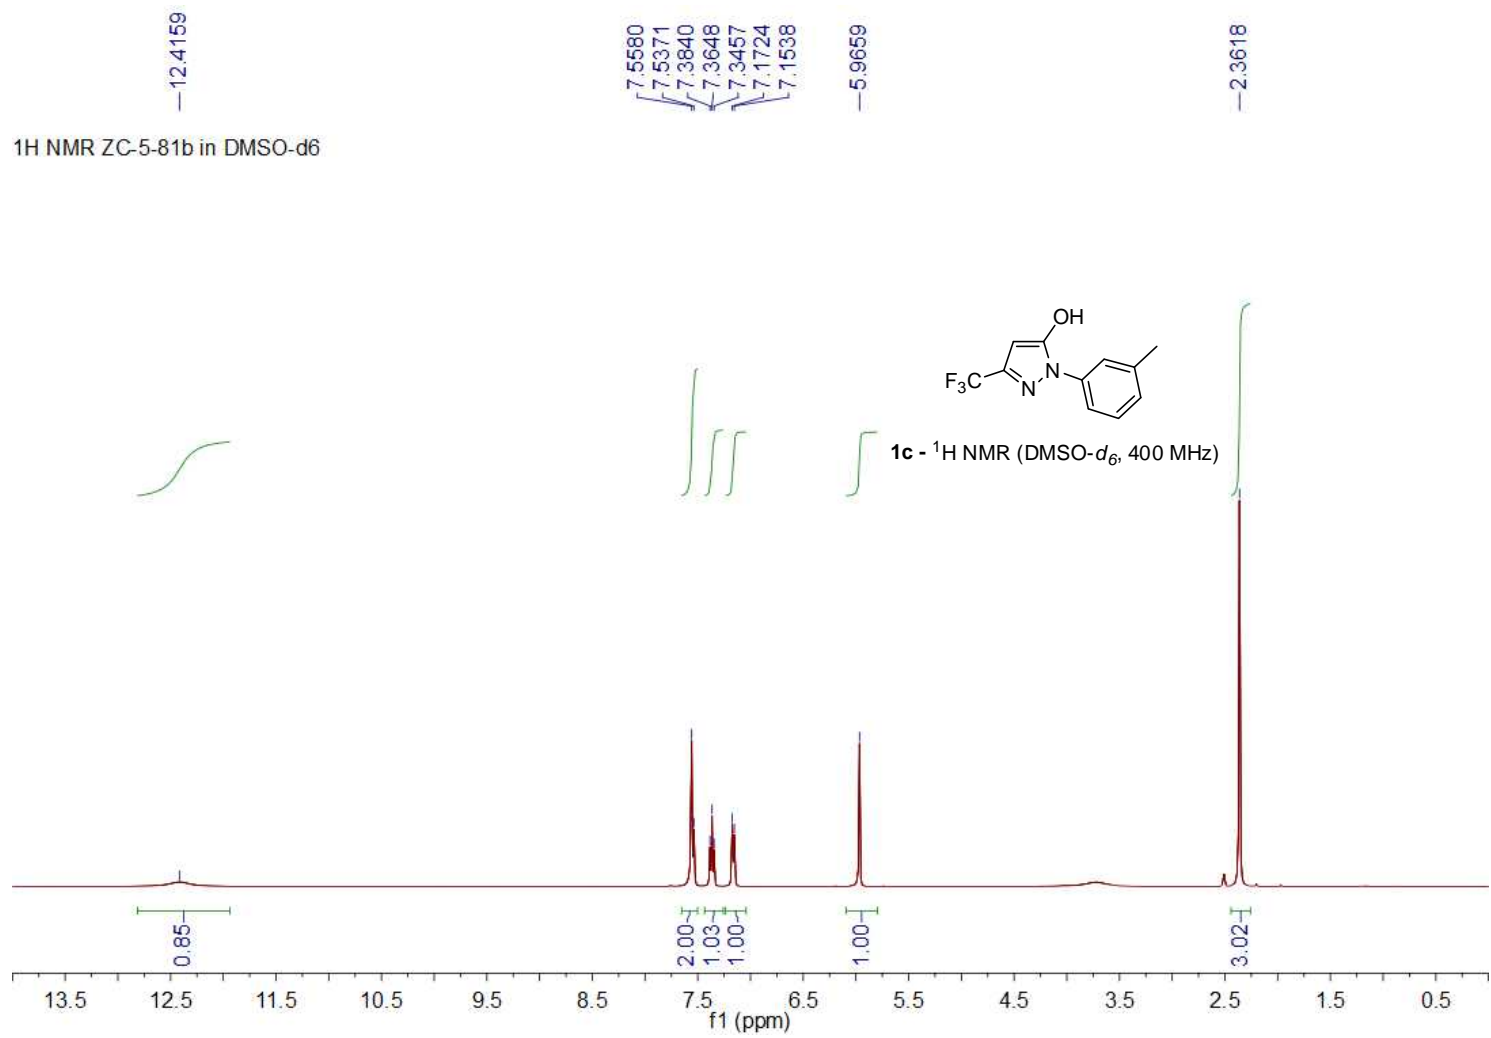

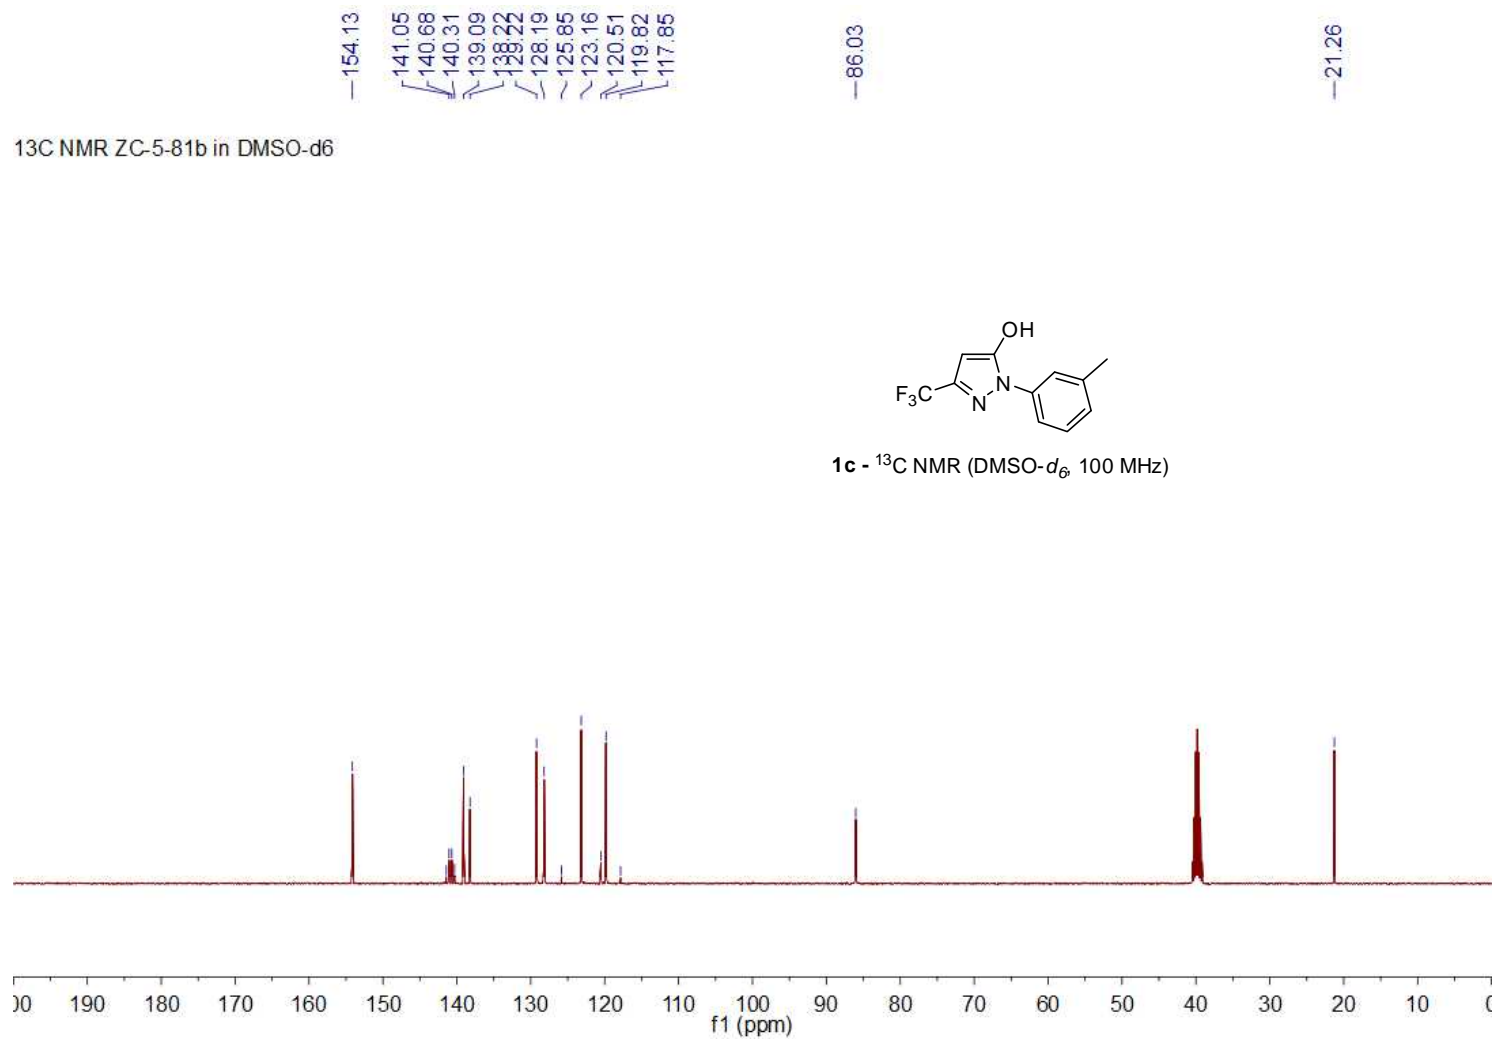

<sup>19</sup>F NMR ZC-5-81b in DMSO-d<sub>6</sub>

--61.97

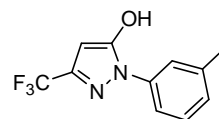

**1c** - <sup>19</sup>F NMR (DMSO-d<sub>6</sub>, 377 MHz)

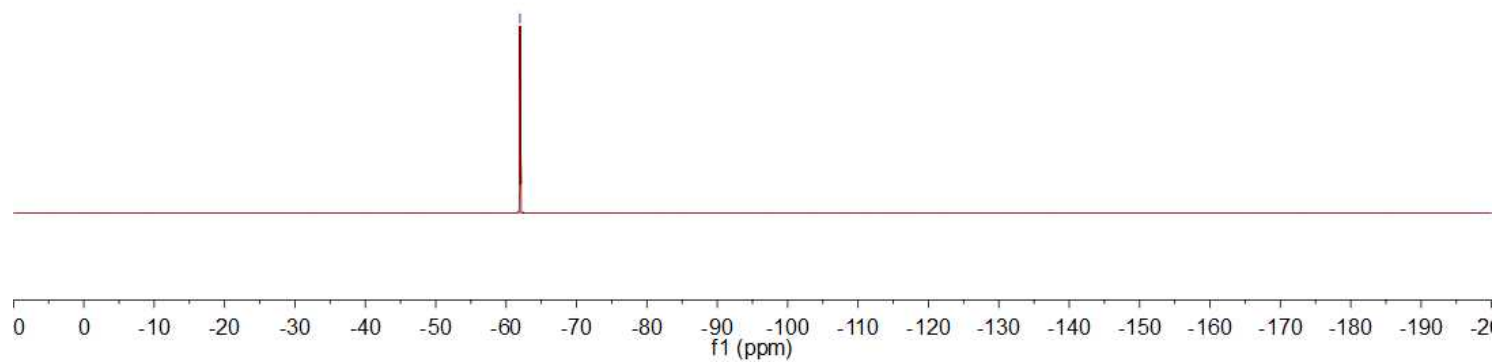

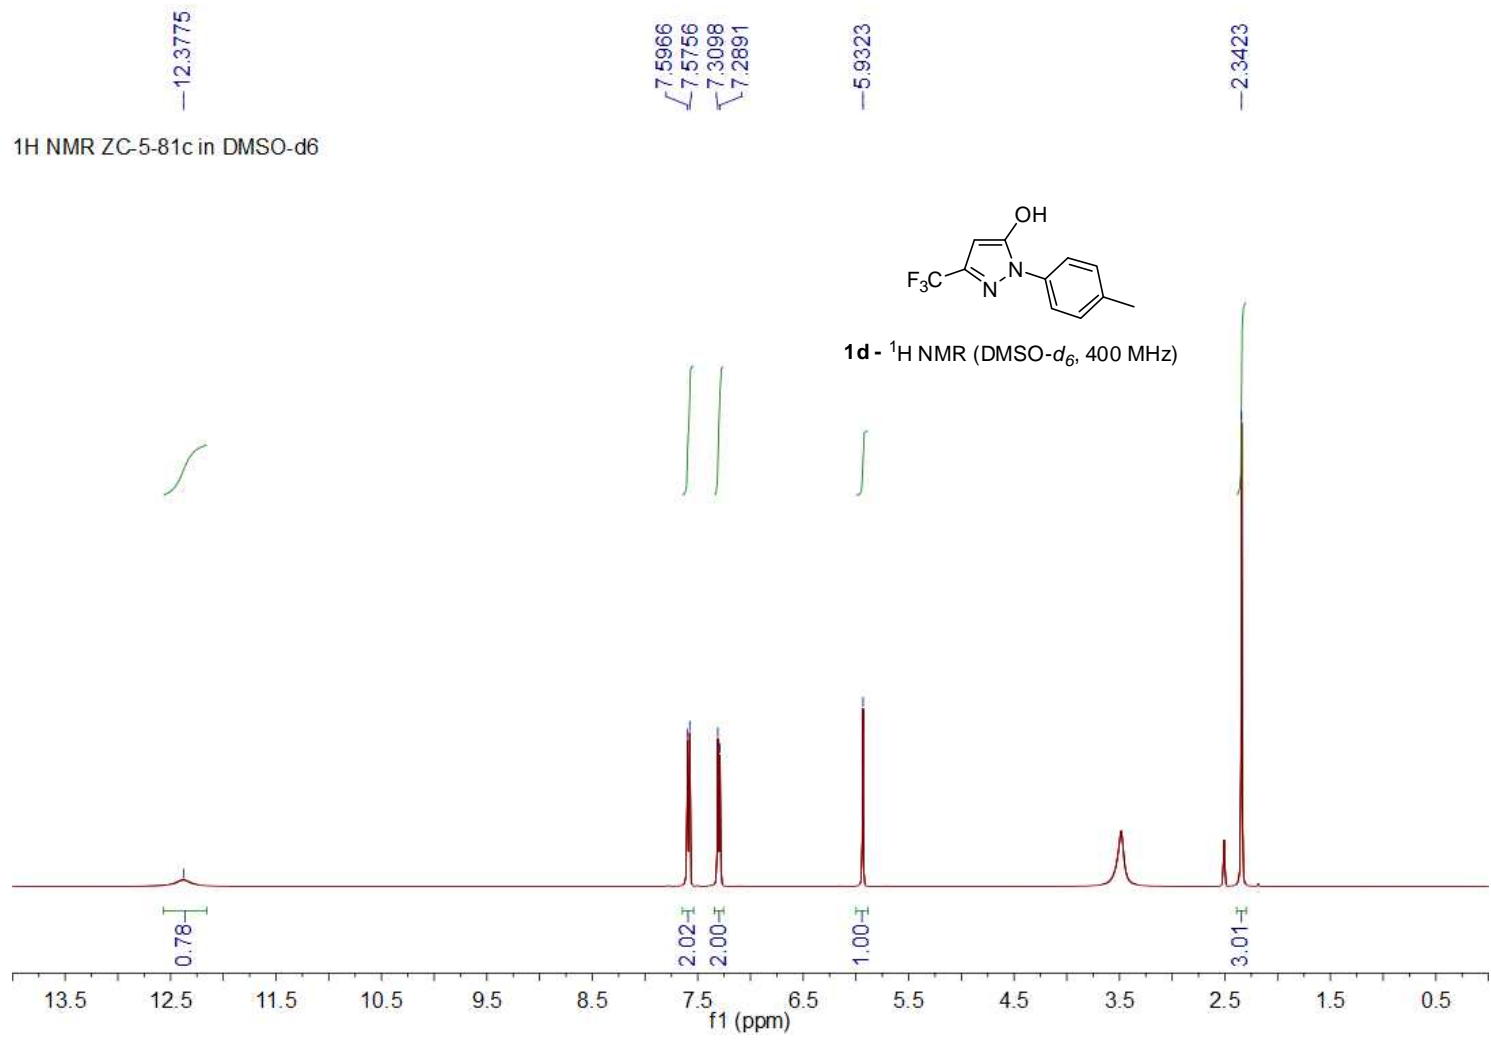

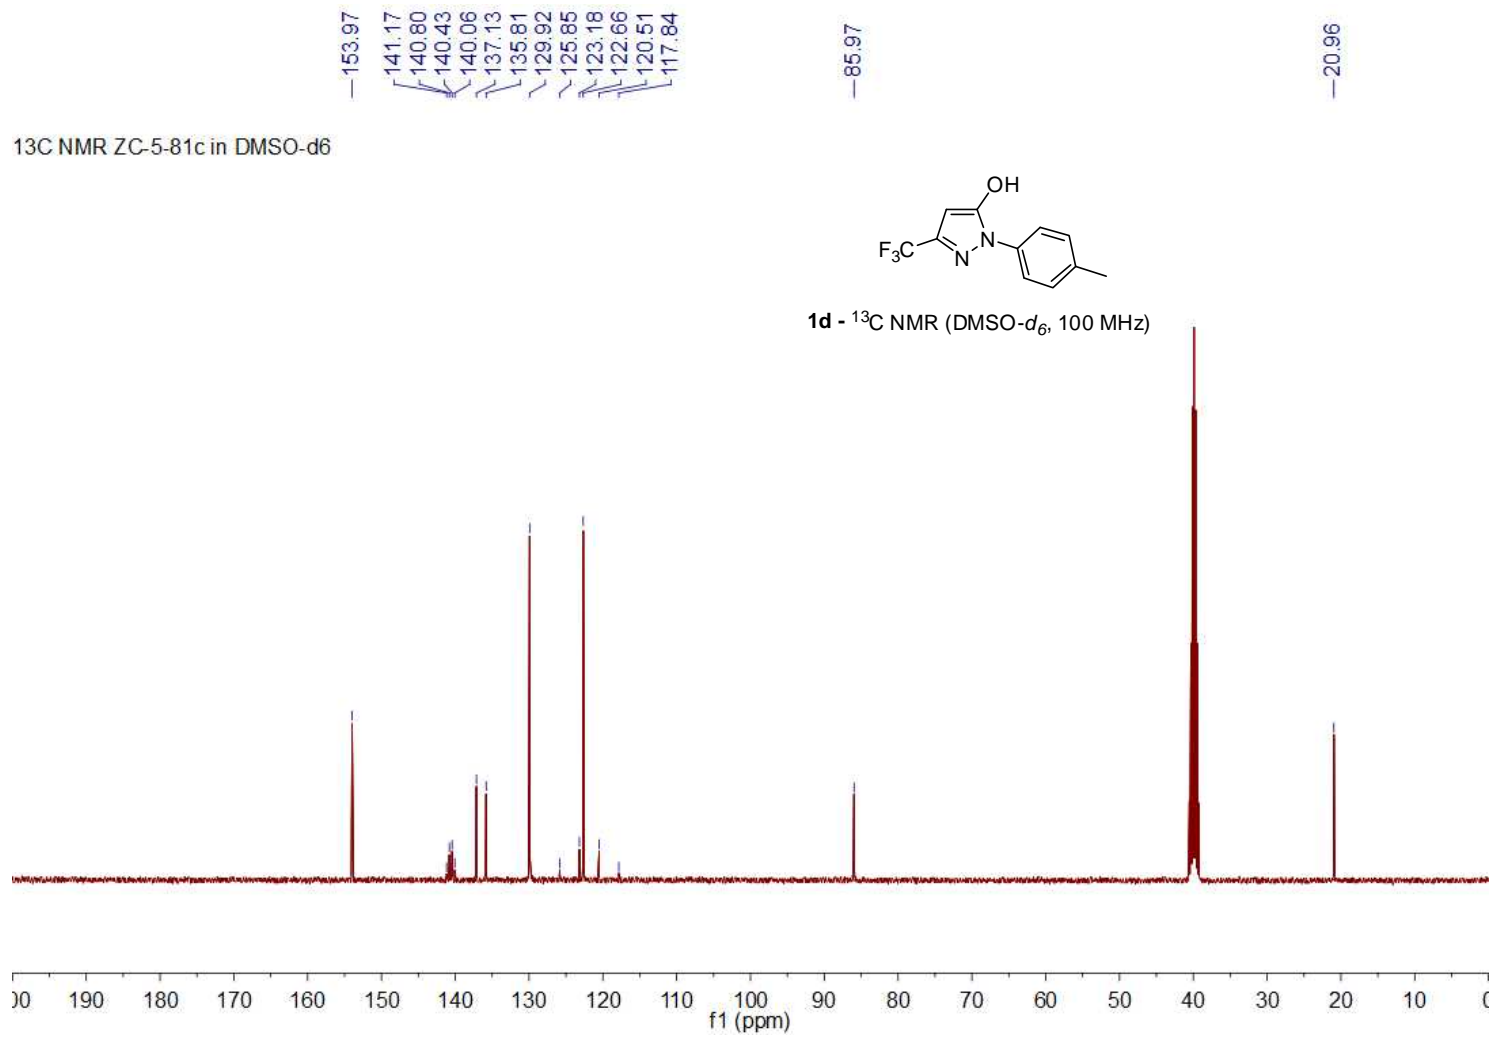

<sup>19</sup>F NMR ZC-5-81c in DMSO-d<sub>6</sub>

-61.80

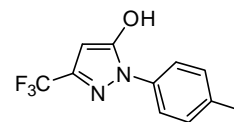

**1d** - <sup>19</sup>F NMR (DMSO-d<sub>6</sub>, 377 MHz)

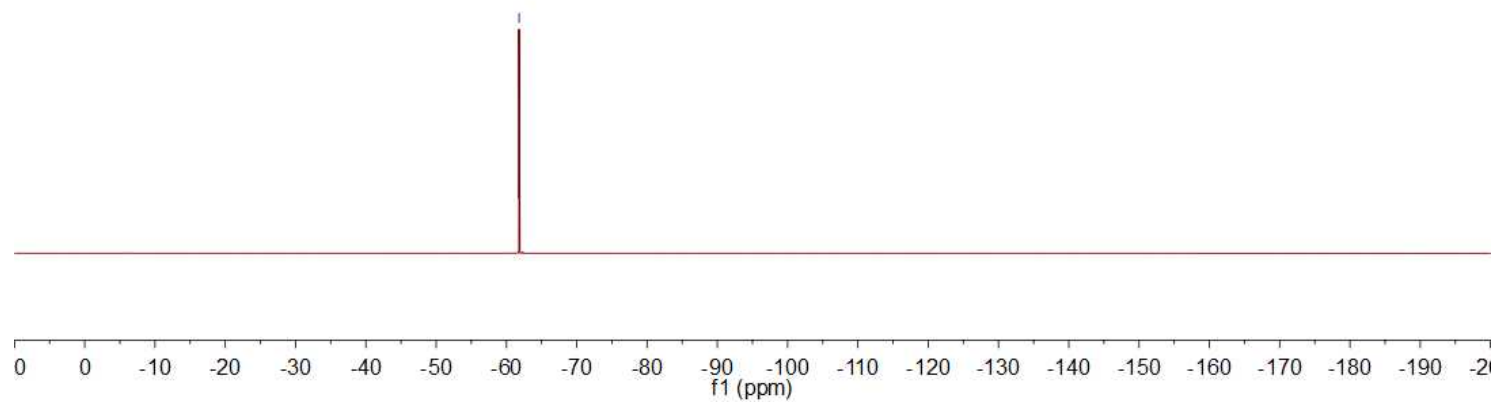

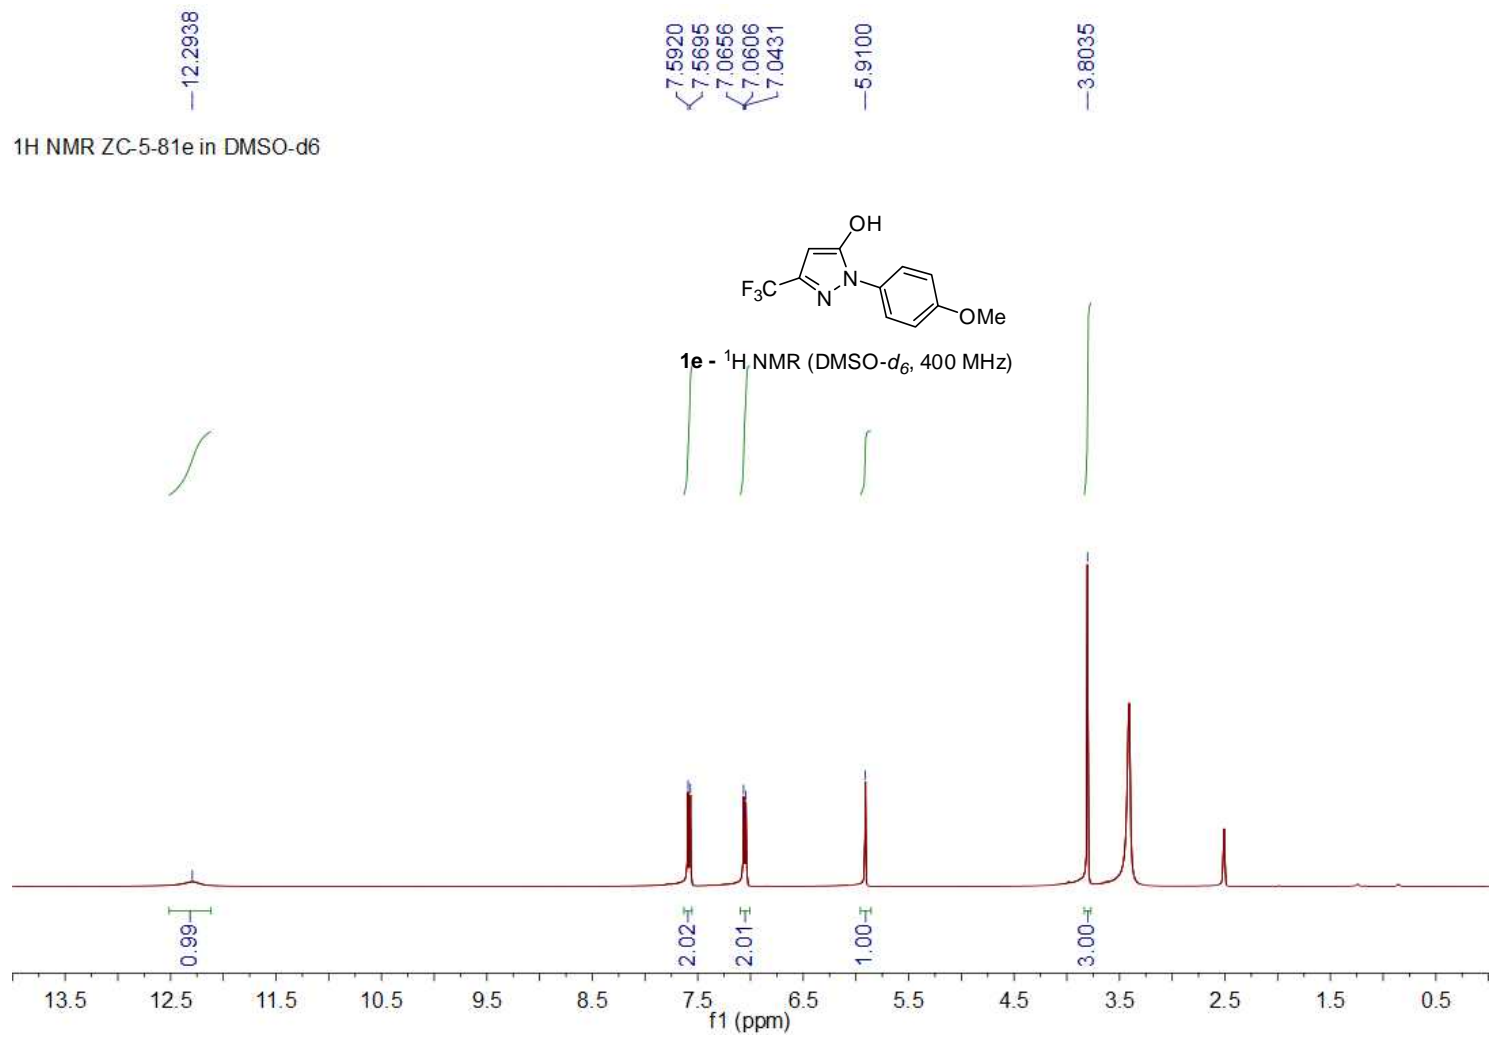

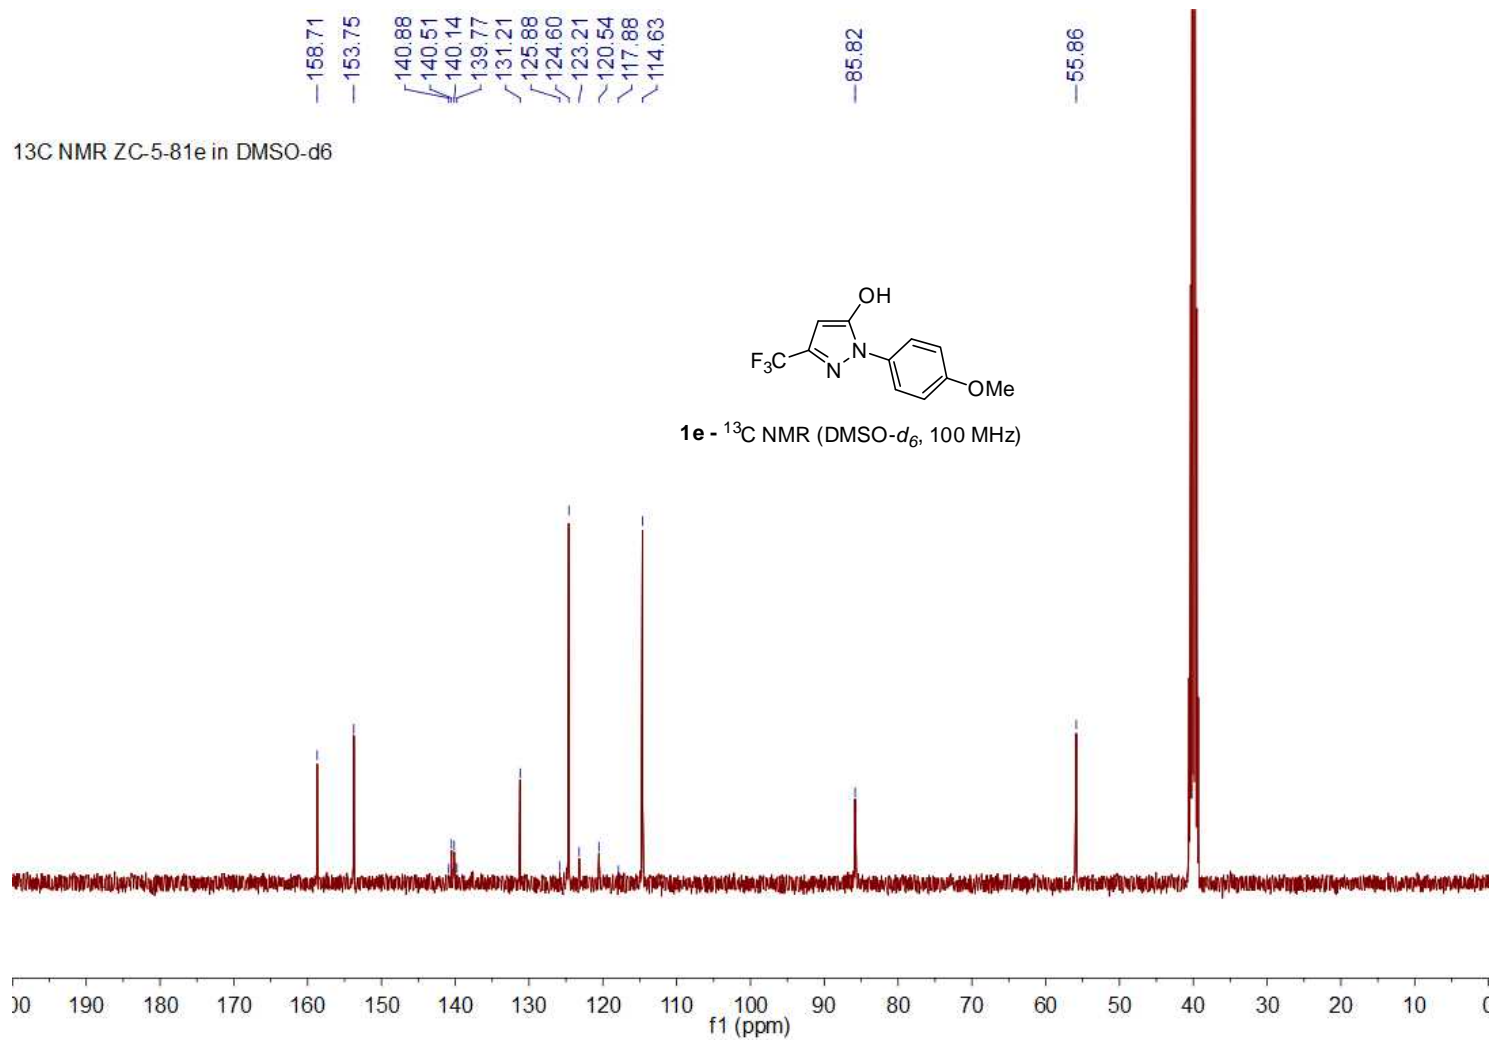



<sup>19</sup>F NMR ZC-5-81e in DMSO-d<sub>6</sub>

—61.67

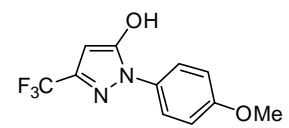

**1e** - <sup>19</sup>F NMR (DMSO-d<sub>6</sub>, 377 MHz)

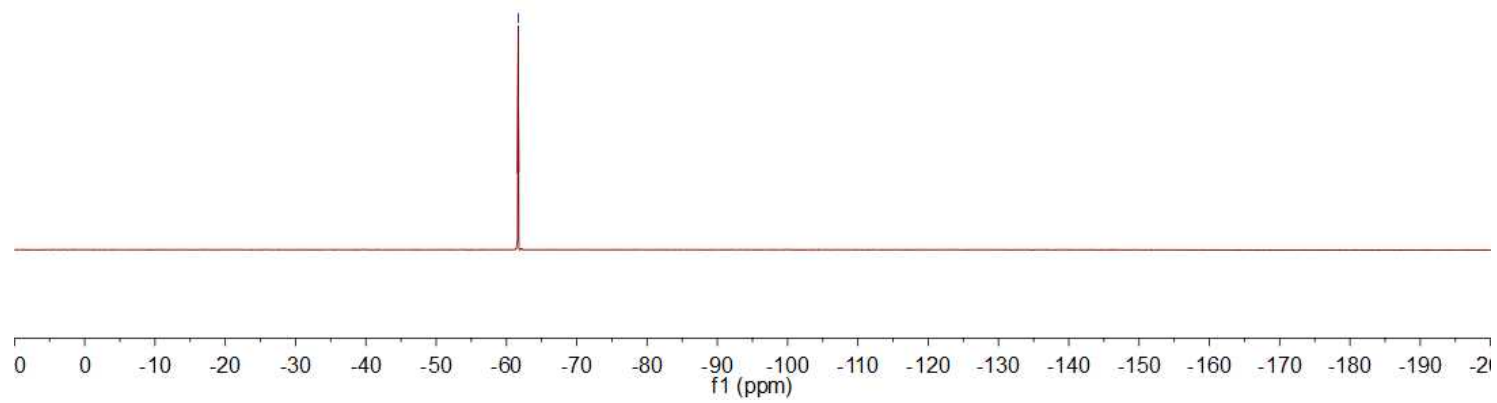

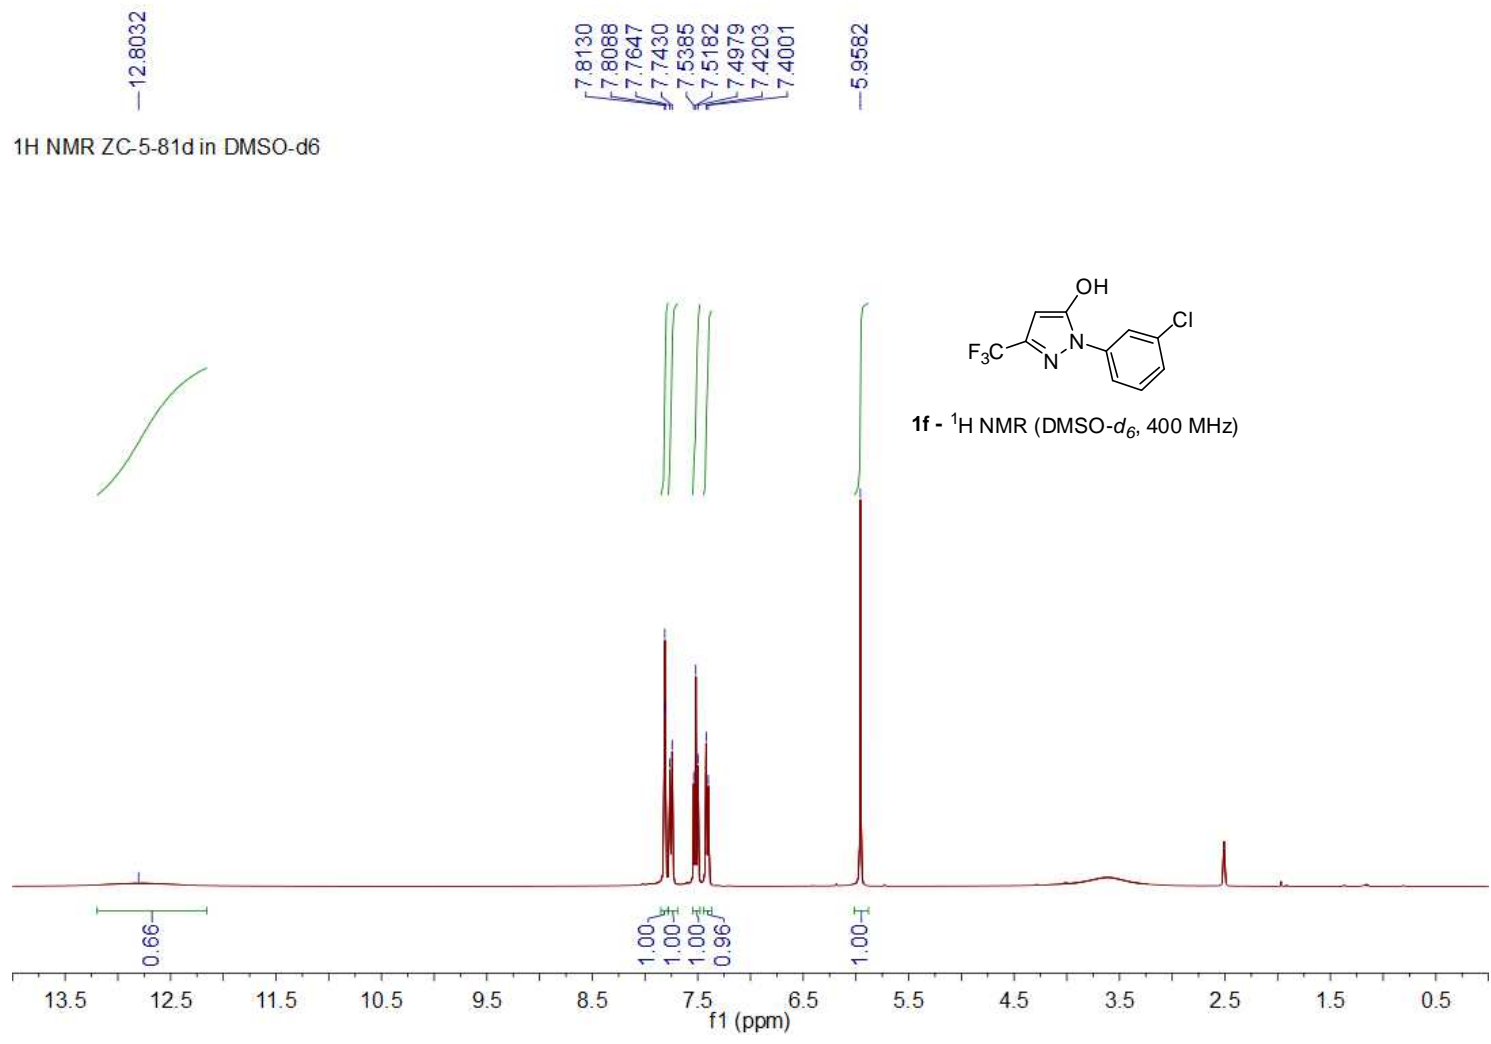

154.59  
142.06  
141.69  
141.32  
140.95  
139.41  
133.87  
131.23  
127.27  
125.63  
122.96  
121.86  
120.74  
120.29  
117.62

86.26

<sup>13</sup>C NMR ZC-5-81d in DMSO-d<sub>6</sub>

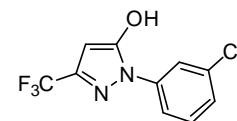

**1f** - <sup>13</sup>C NMR (DMSO-d<sub>6</sub>, 100 MHz)

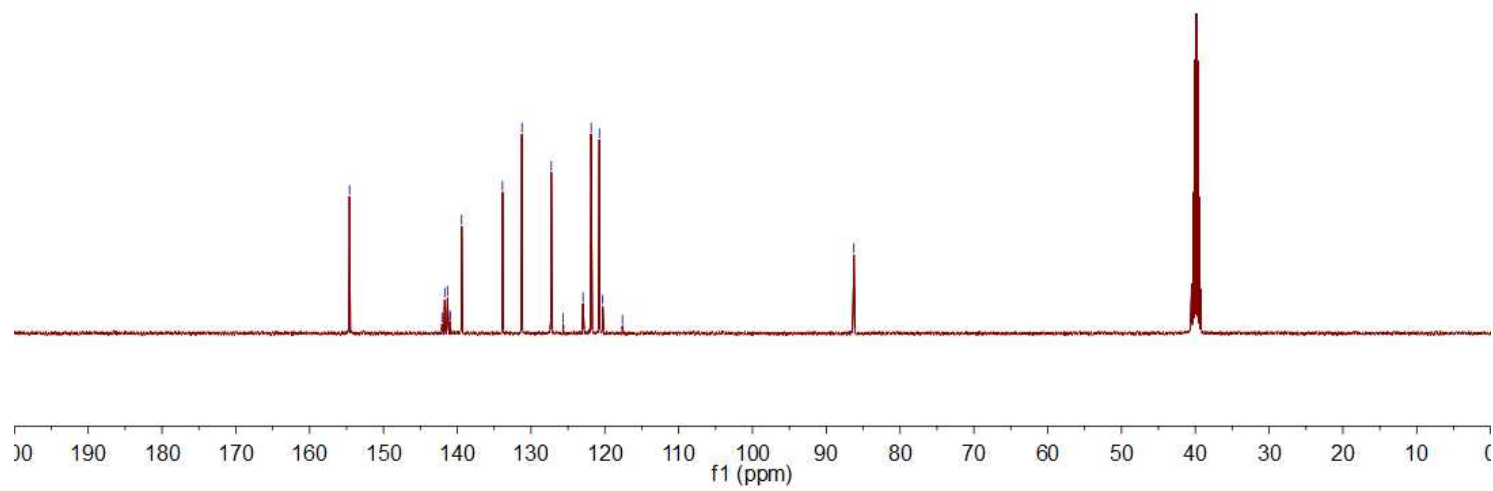

<sup>19</sup>F NMR ZC-5-81d in DMSO-d<sub>6</sub>

-62.18

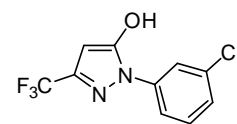

**1f** - <sup>19</sup>F NMR (DMSO-*d*<sub>6</sub>, 377 MHz)

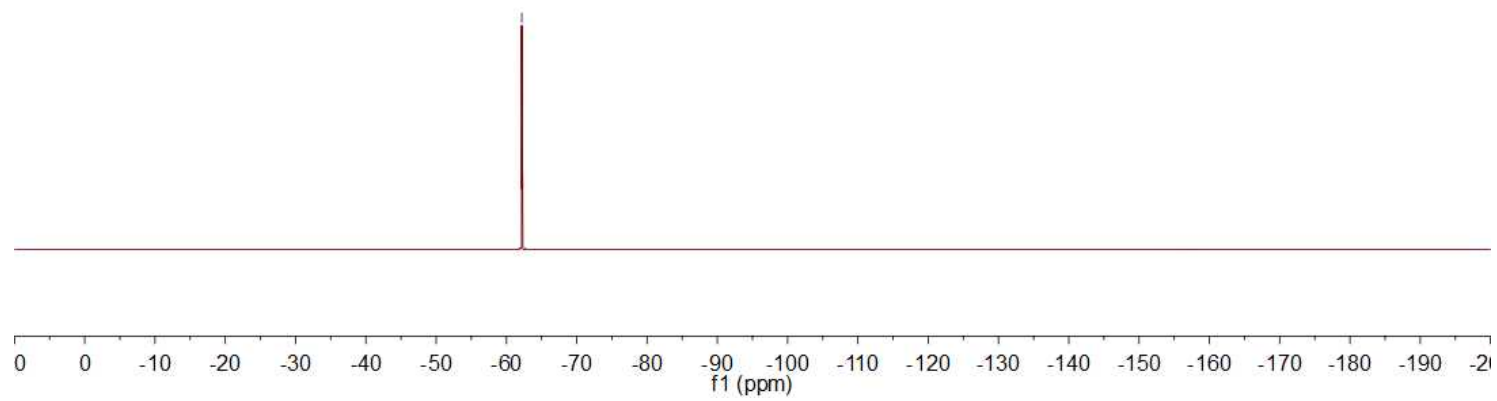

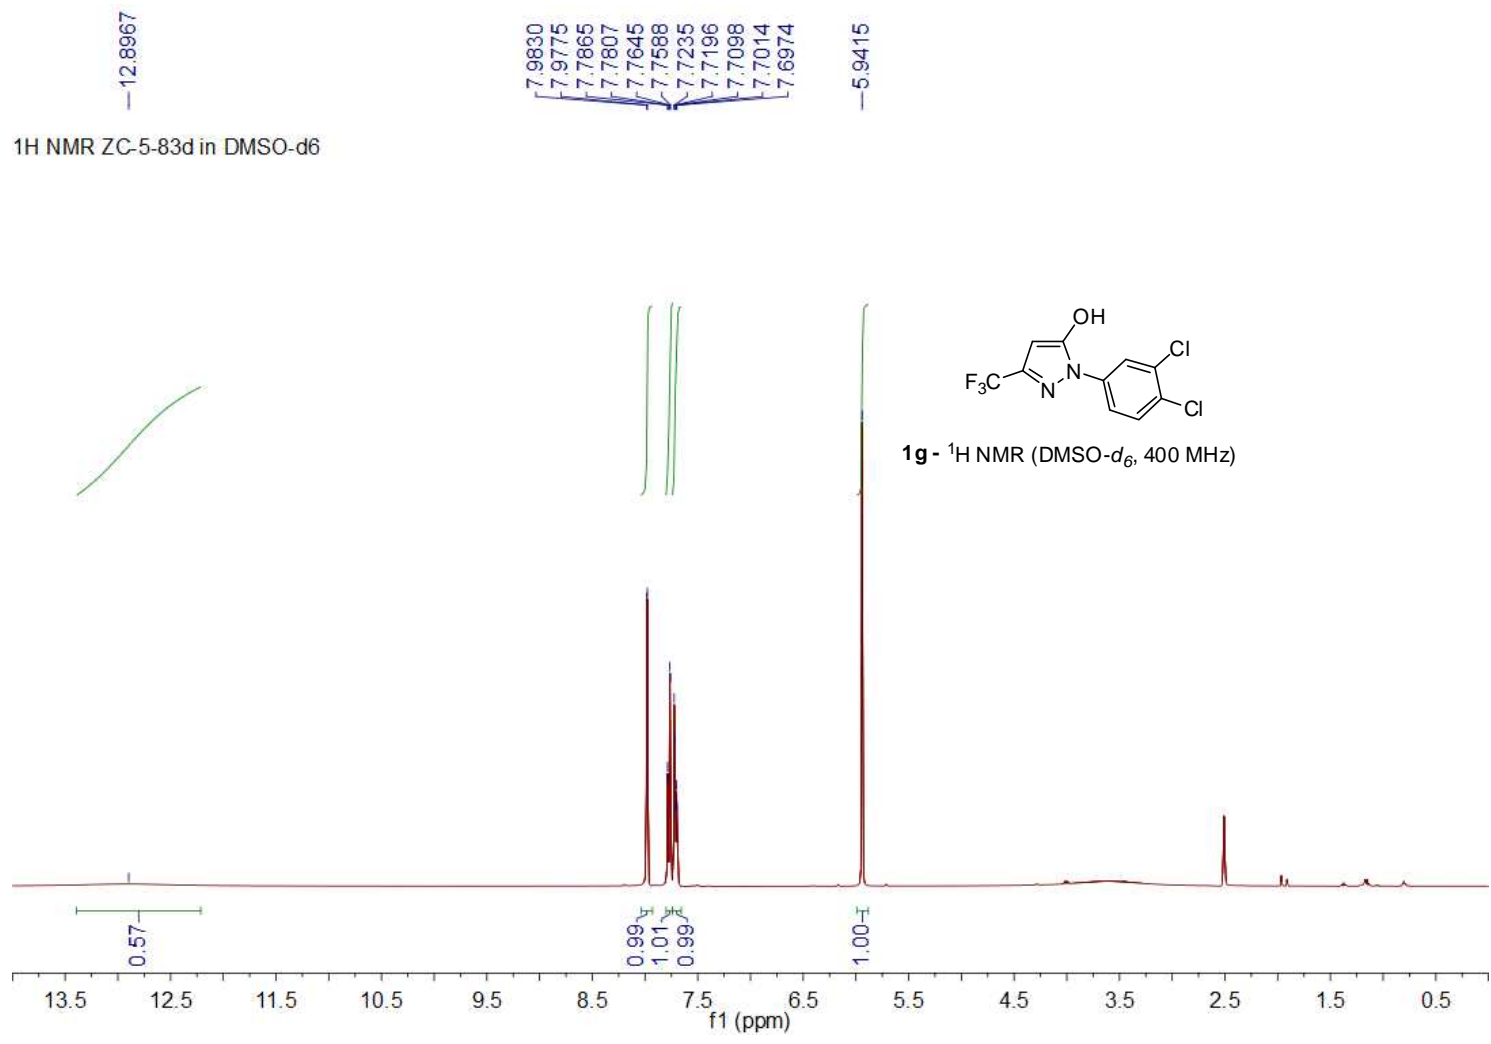

154.76  
142.29  
141.91  
141.54  
141.17  
137.91  
131.99  
131.47  
129.72  
125.54  
123.36  
122.86  
121.90  
120.19  
117.52

86.33

<sup>13</sup>C NMR ZC-5-83d in DMSO-d<sub>6</sub>

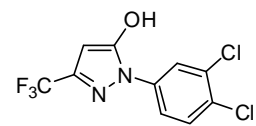

**1g** - <sup>13</sup>C NMR (DMSO-d<sub>6</sub>, 100 MHz)

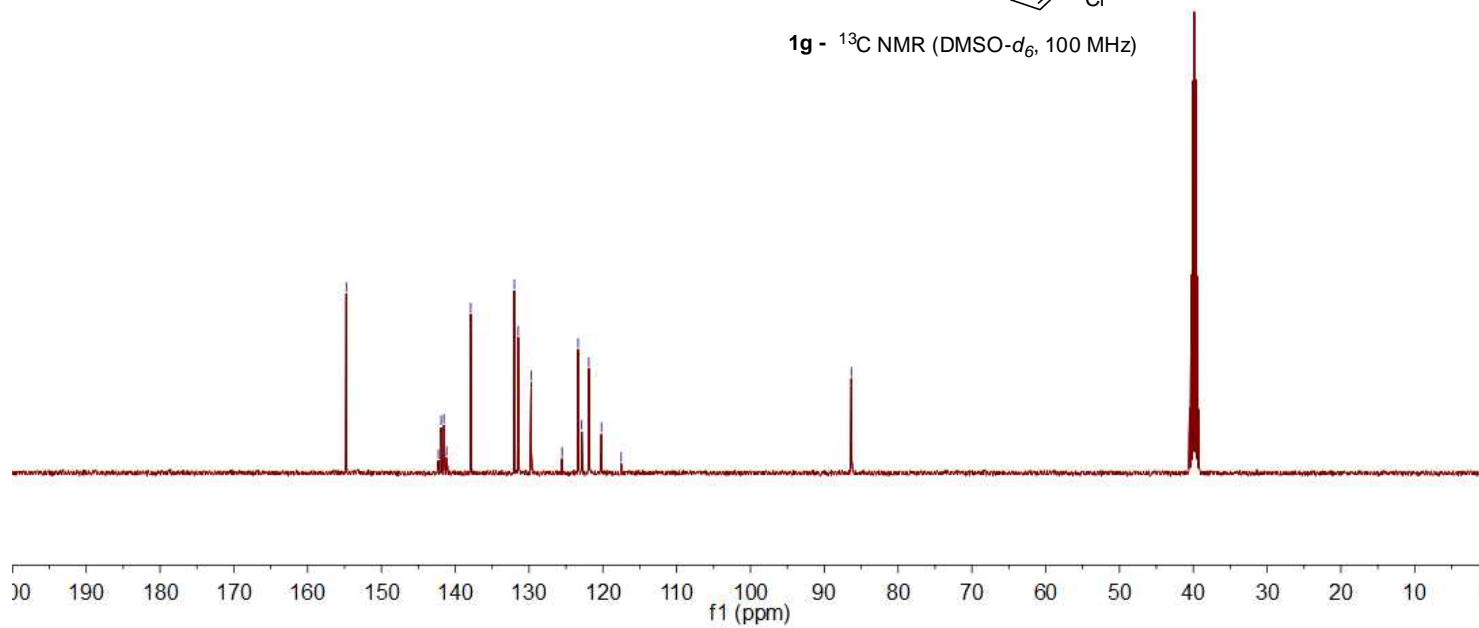

<sup>19</sup>F NMR ZC-5-83d in DMSO-d<sub>6</sub>

-62.27

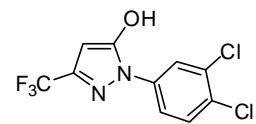

**1g** - <sup>19</sup>F NMR (DMSO-d<sub>6</sub>, 377 MHz)

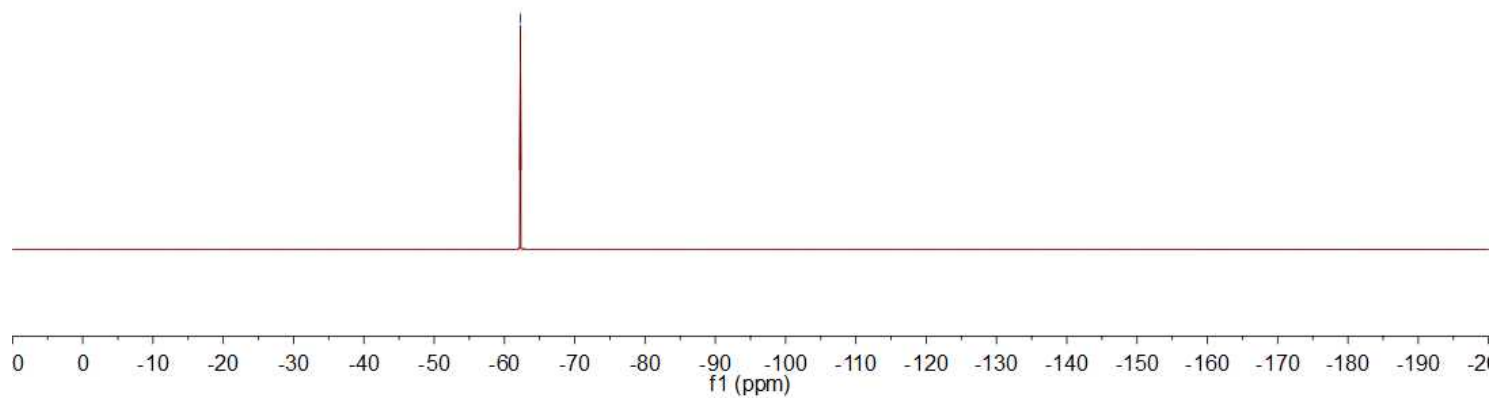

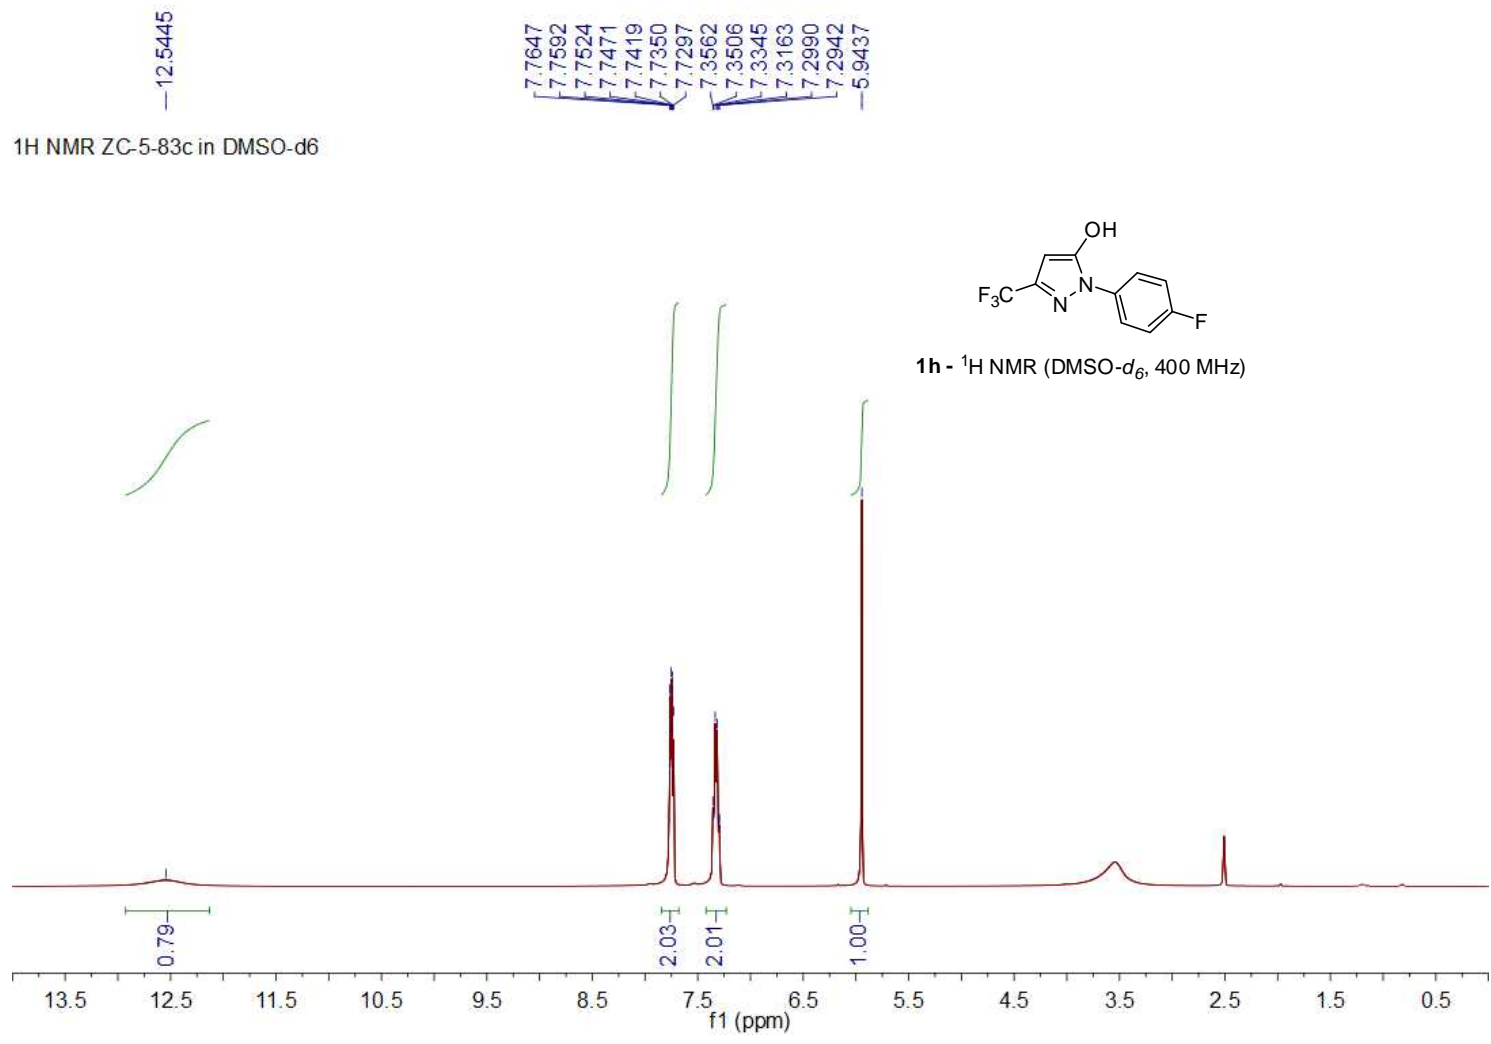



162.37  
159.94  
154.10  
141.48  
141.12  
140.75  
140.38  
134.55  
134.53  
125.75  
124.99  
124.90  
123.08  
120.41  
117.74  
116.47  
116.24  
85.99

<sup>13</sup>C NMR ZC-5-83c in DMSO-d<sub>6</sub>

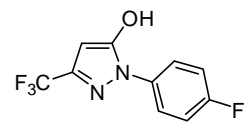

**1h** - <sup>13</sup>C NMR (DMSO-d<sub>6</sub>, 100 MHz)

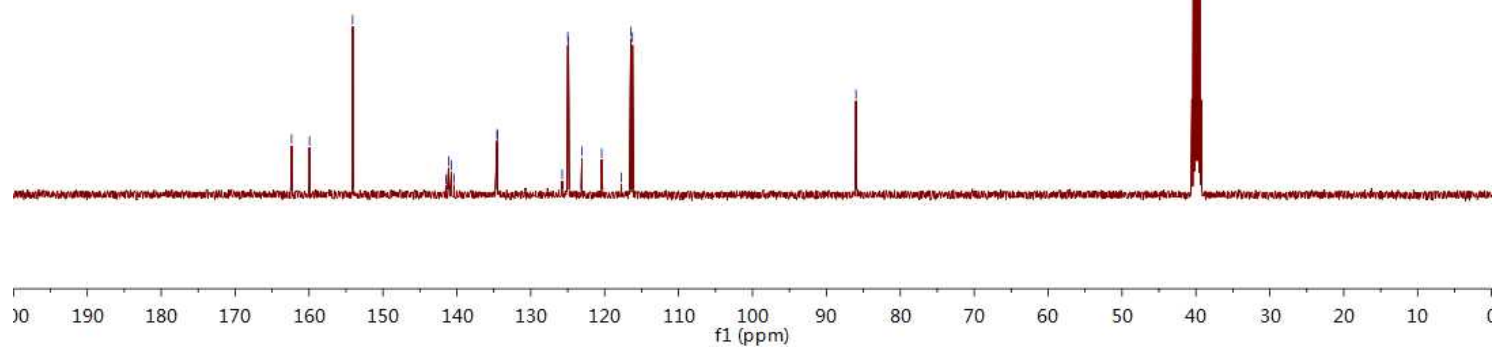

<sup>19</sup>F NMR ZC-5-83c in DMSO-d<sub>6</sub>

-61.97

-114.82

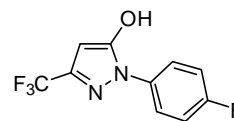

**1h** - <sup>19</sup>F NMR (DMSO-d<sub>6</sub>, 377 MHz)

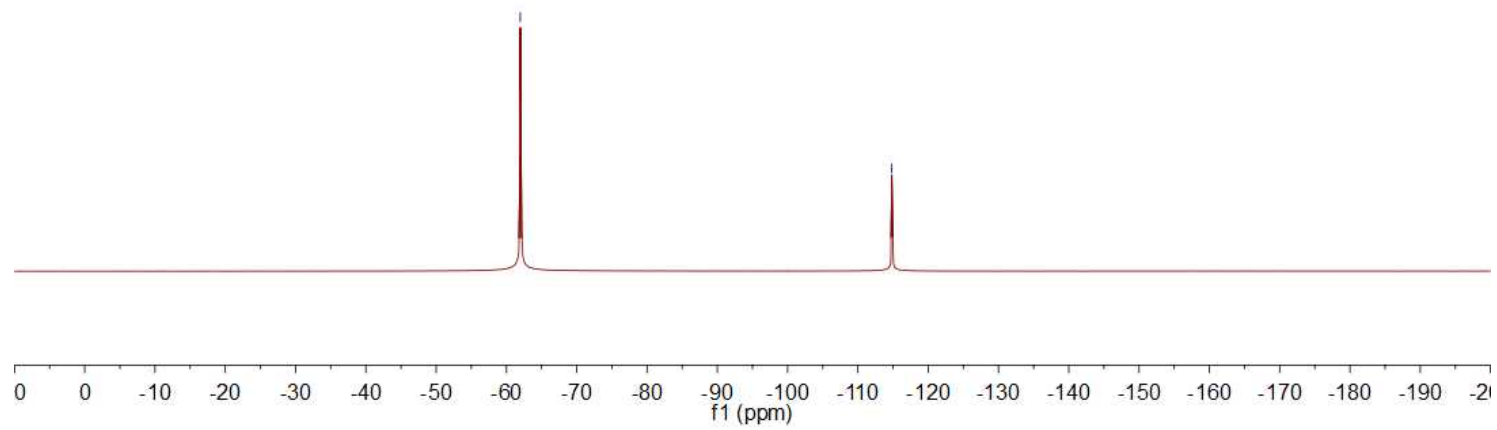

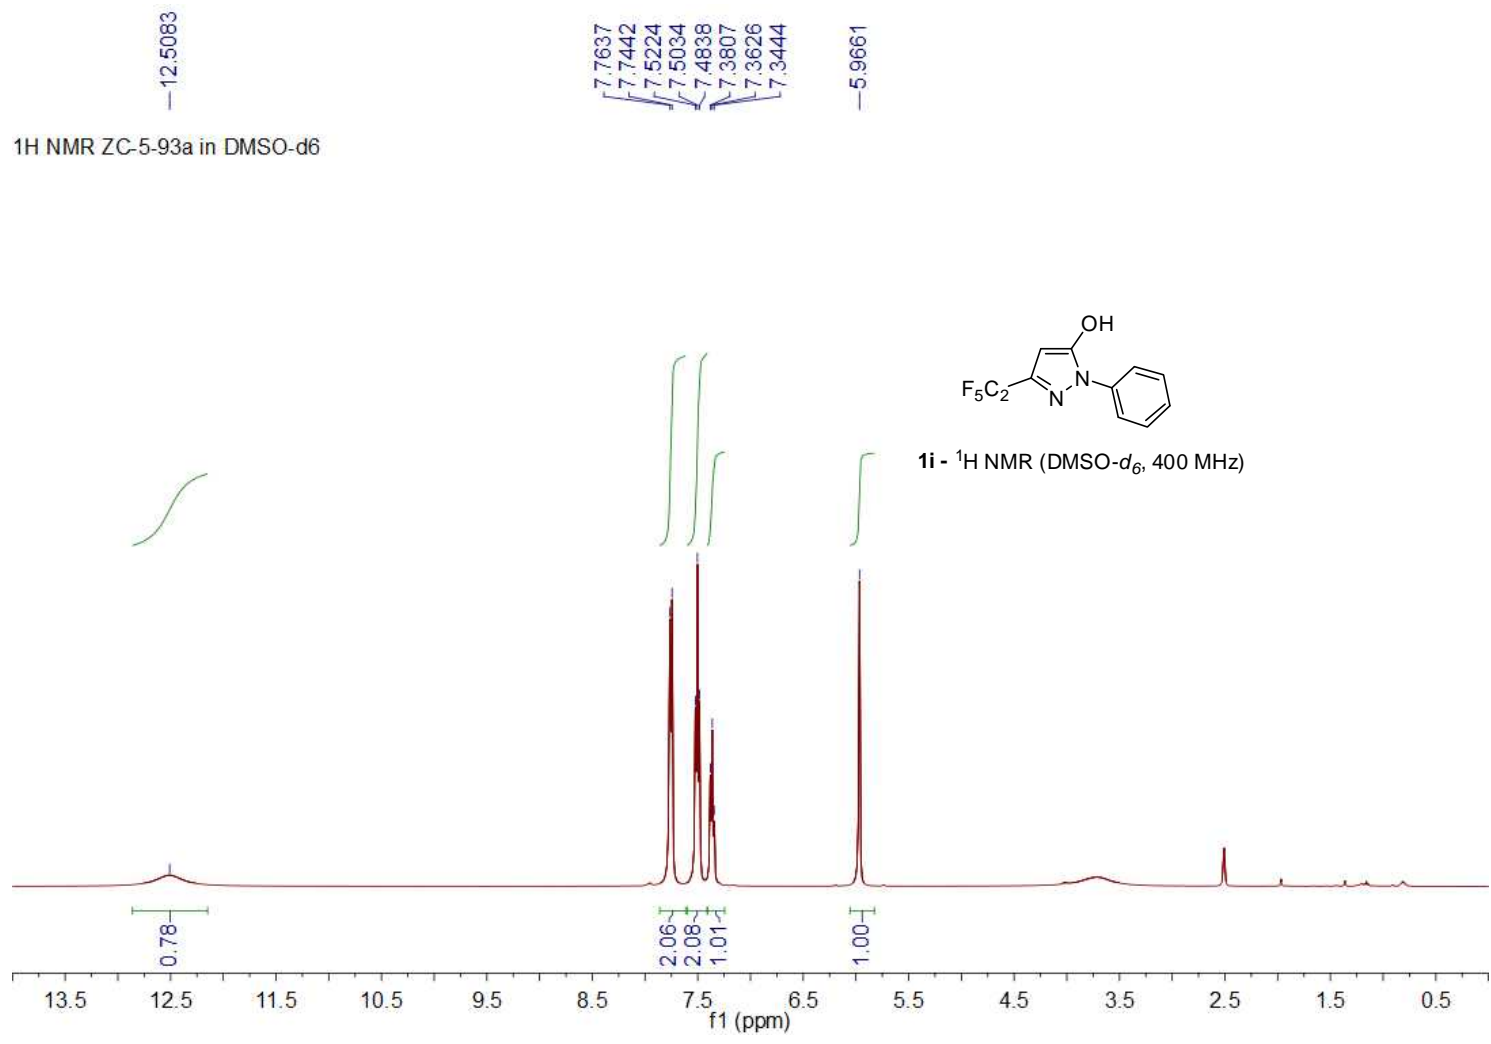

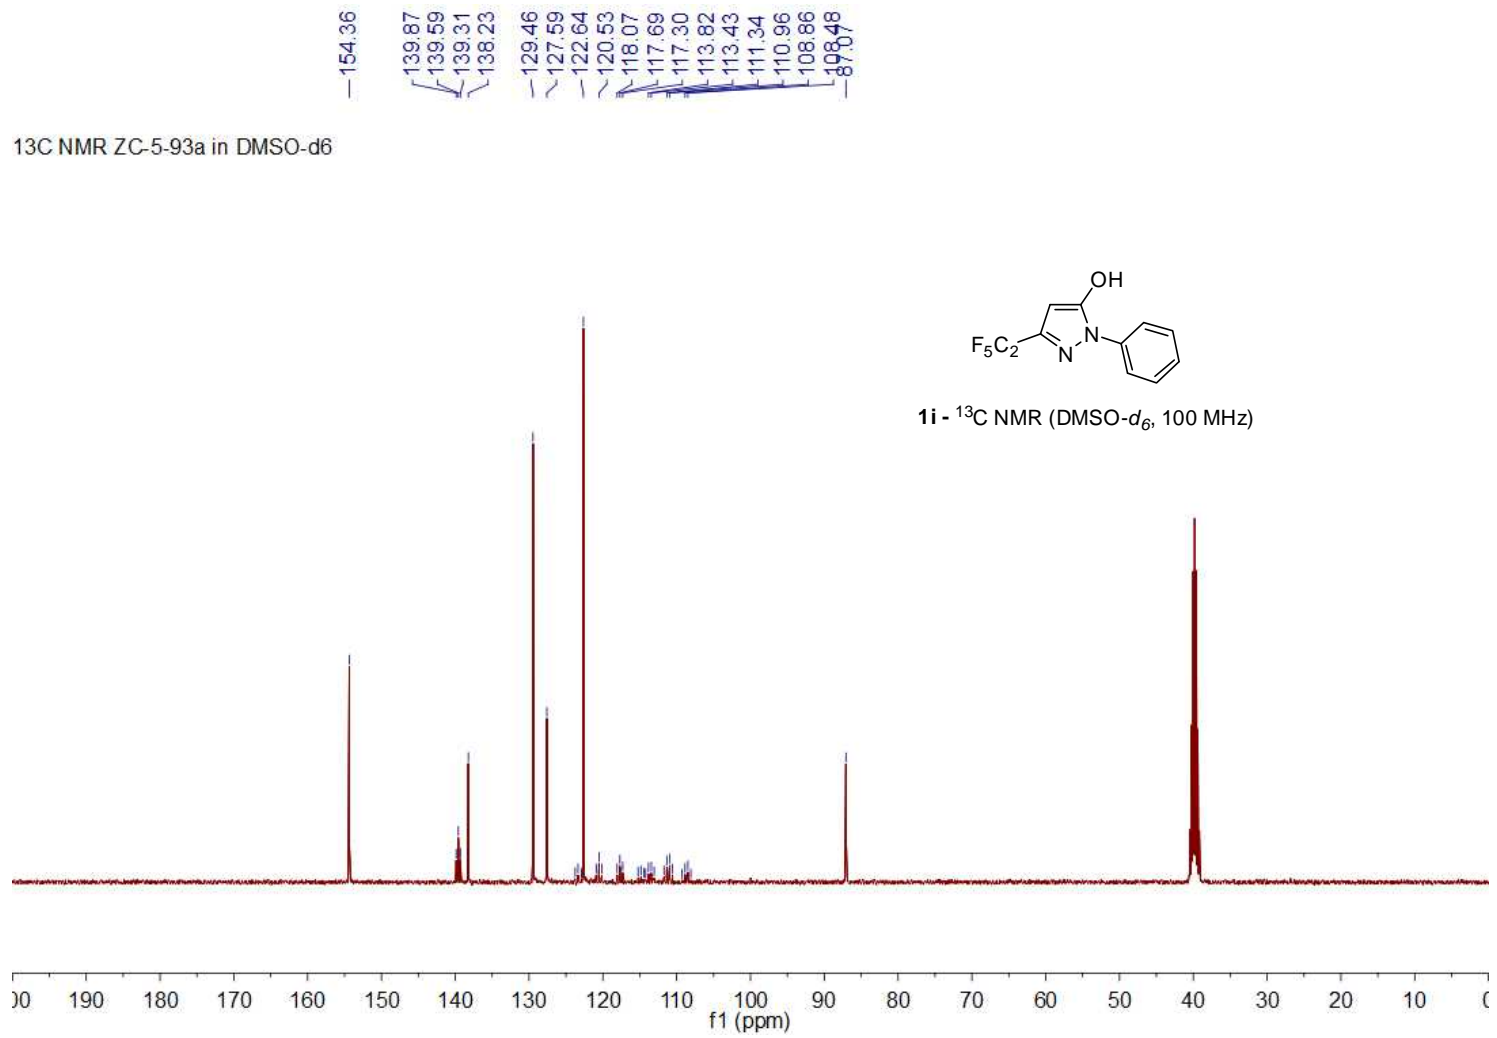

<sup>19</sup>F NMR ZC-5-93a in DMSO-d<sub>6</sub>

—83.75

—112.65

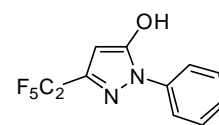

**1i** - <sup>19</sup>F NMR (DMSO-d<sub>6</sub>, 377 MHz)

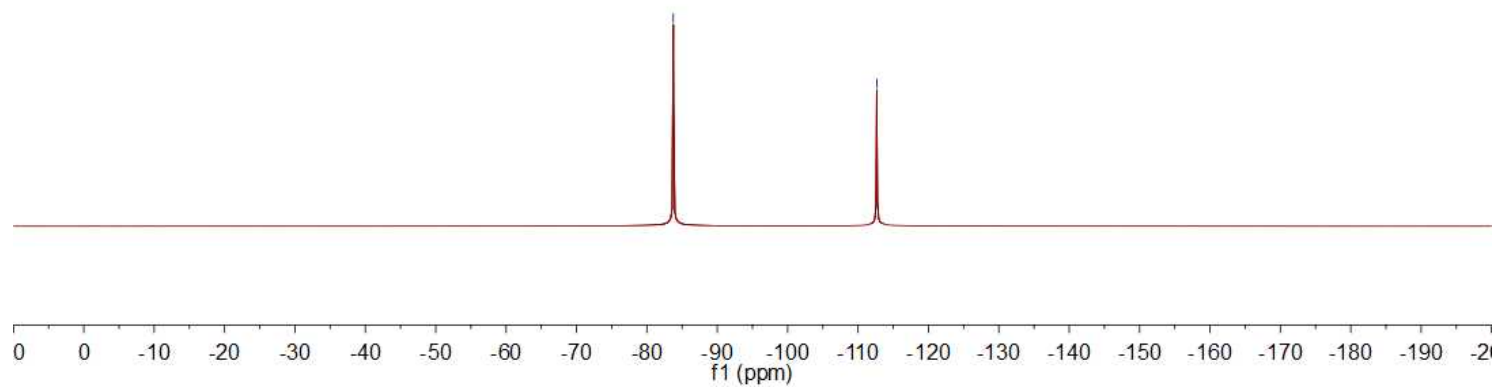

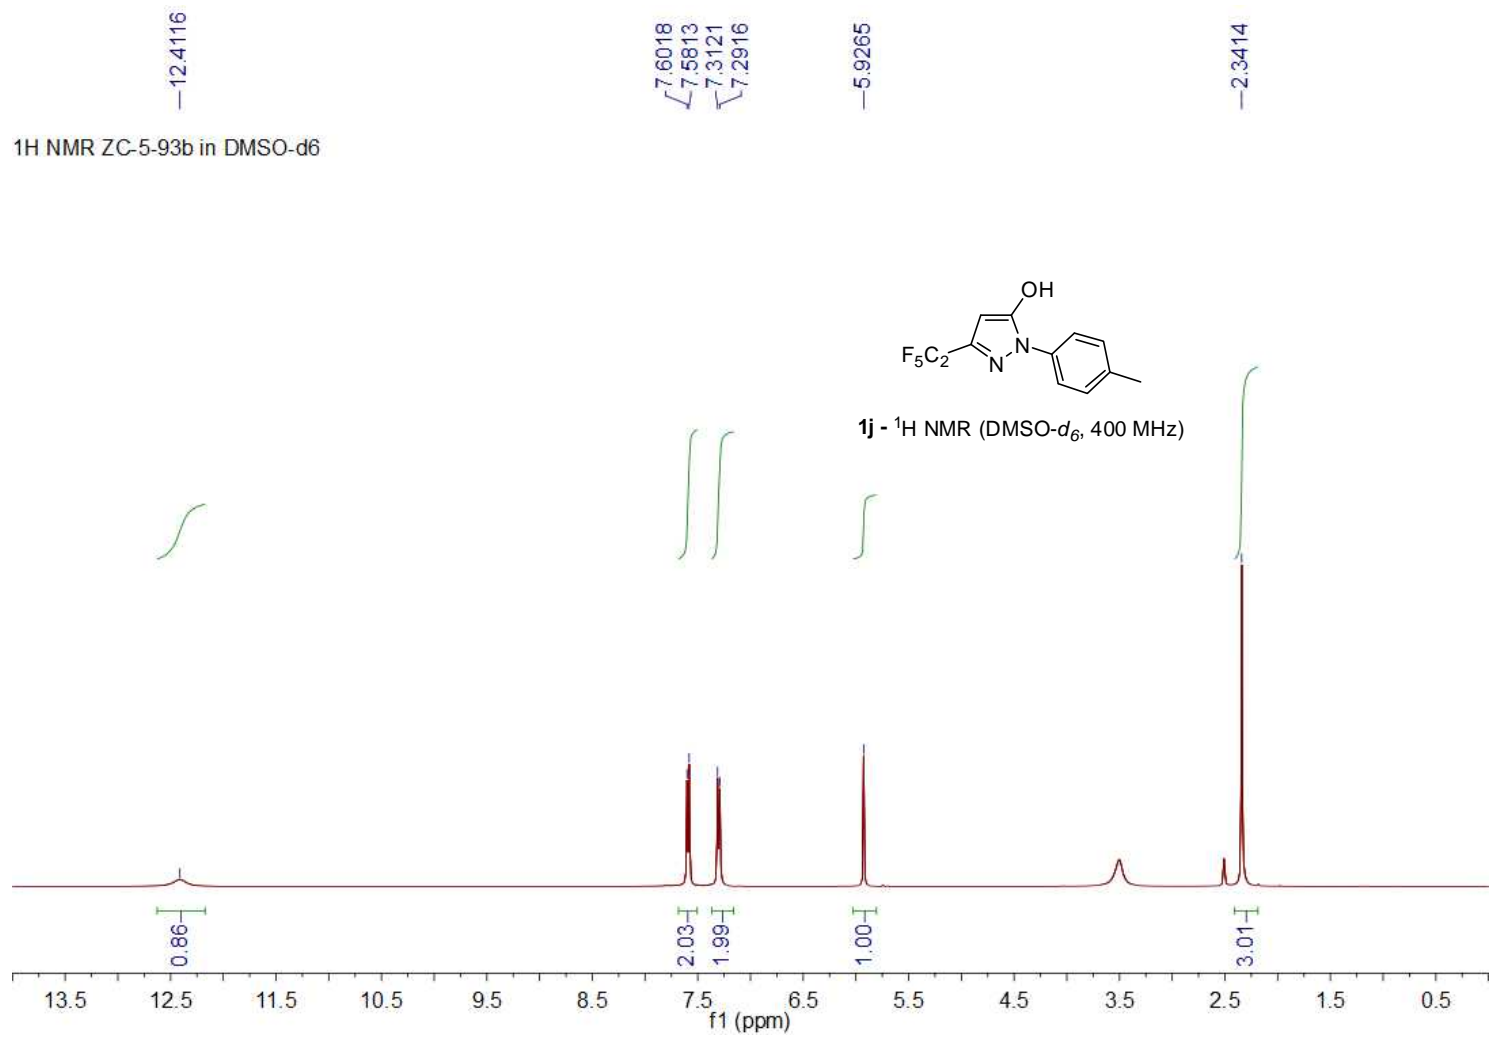

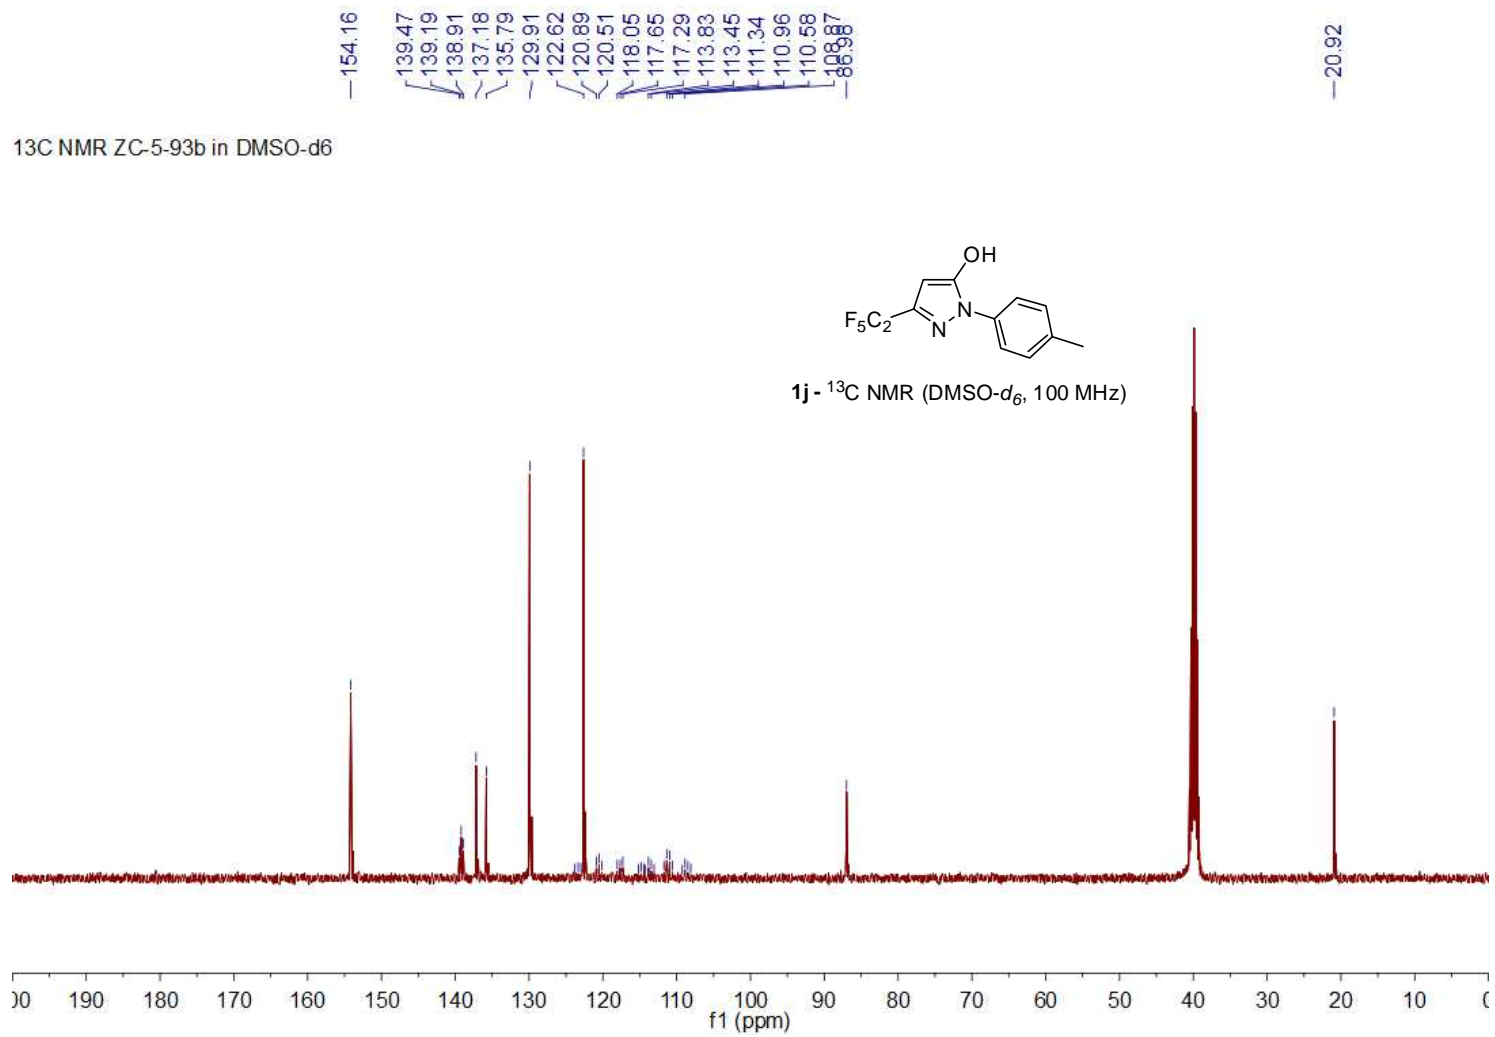

<sup>19</sup>F NMR ZC-5-93b in DMSO-d<sub>6</sub>

-83.62

-112.44

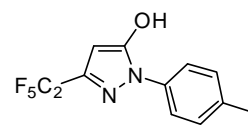

**1j** - <sup>19</sup>F NMR (DMSO-d<sub>6</sub>, 377 MHz)

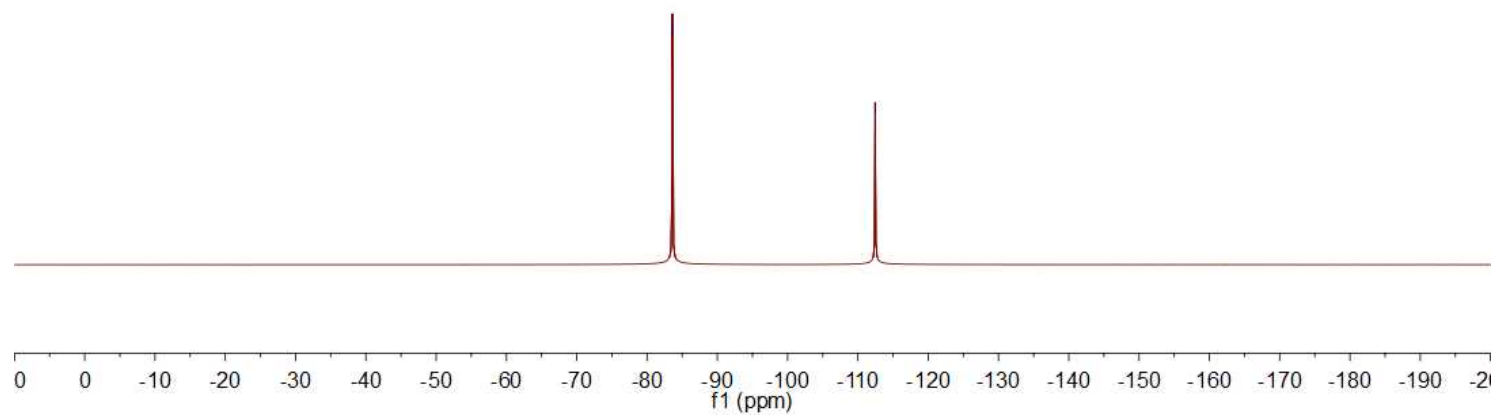



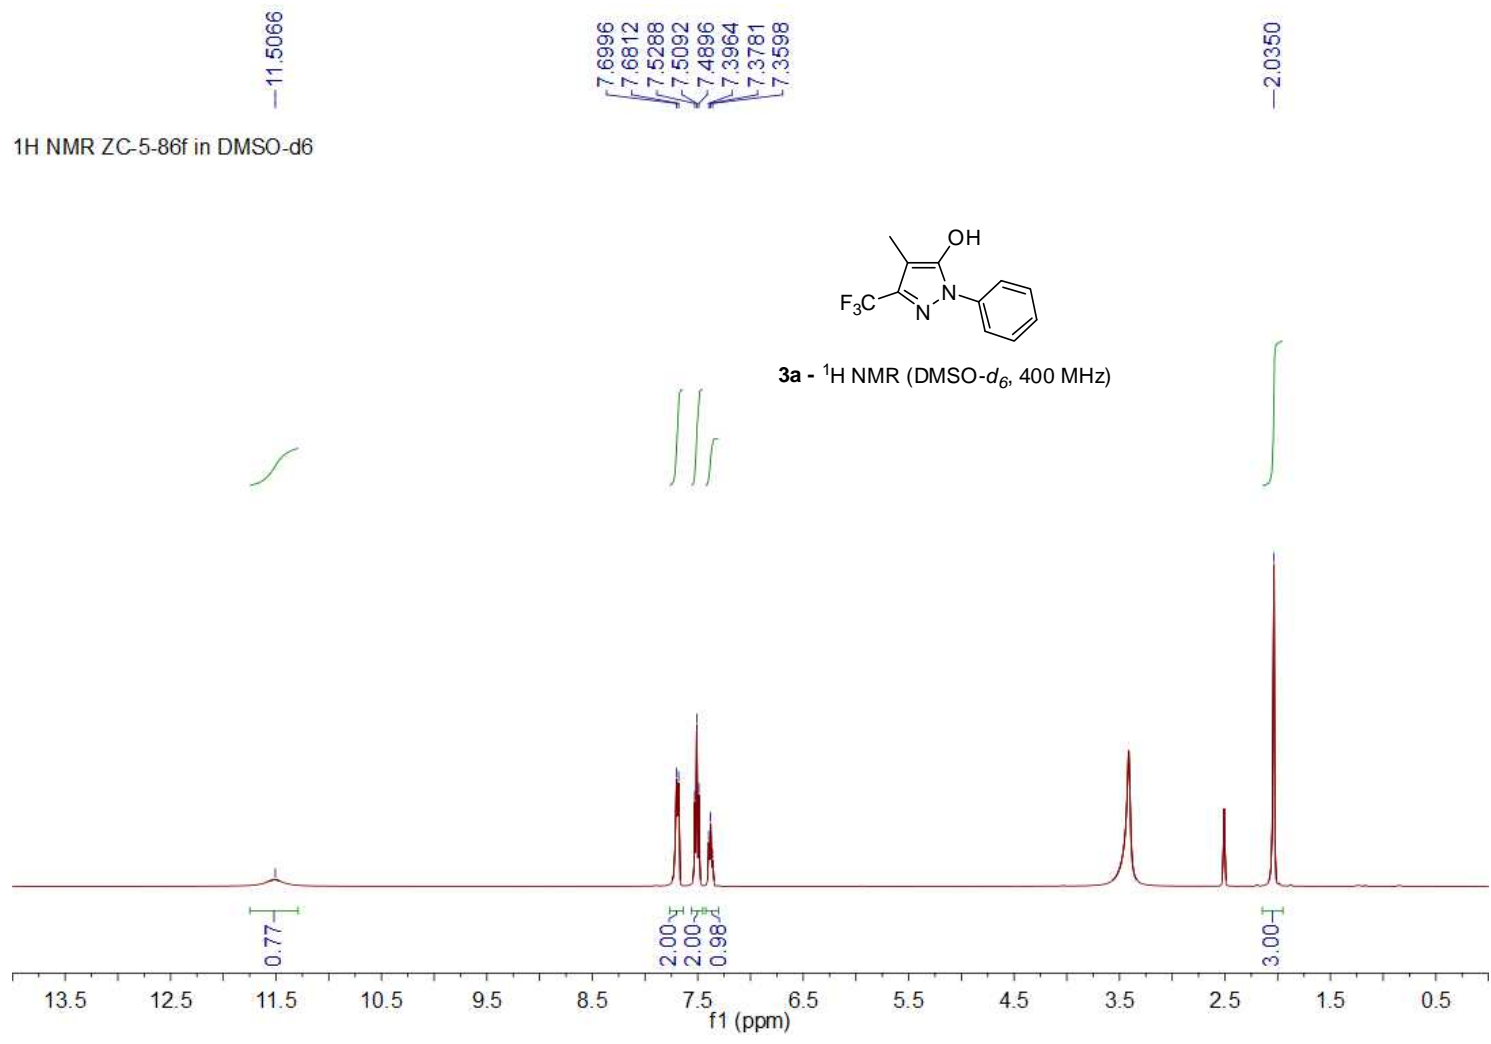

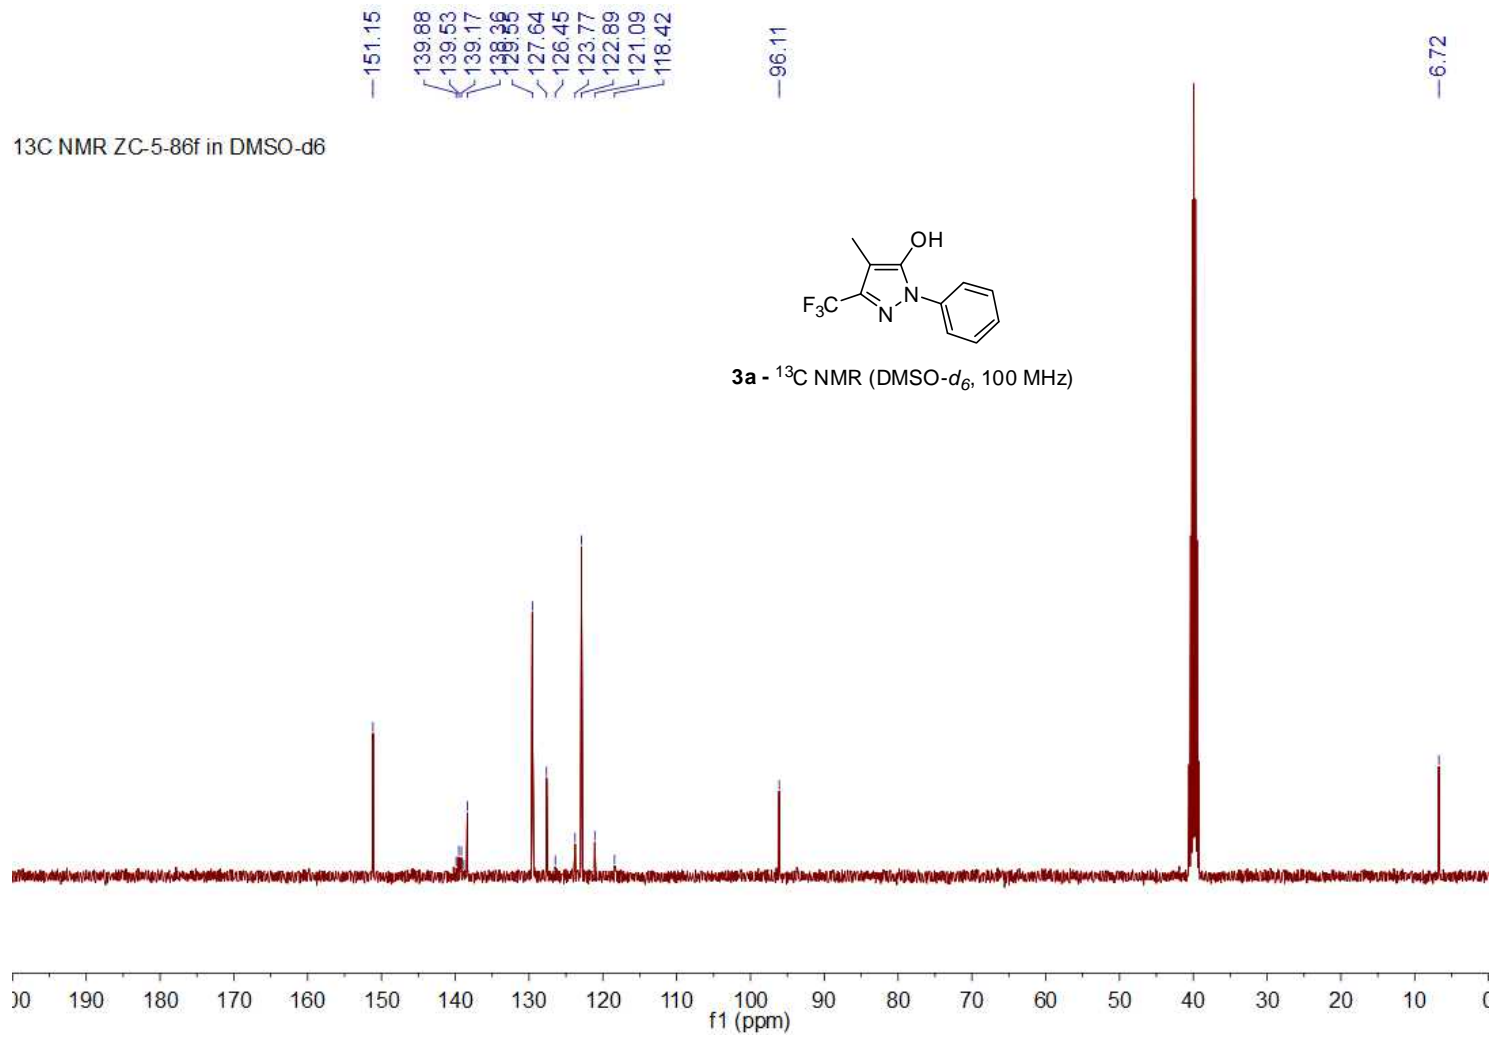

<sup>19</sup>F NMR ZC-5-86f in DMSO-d<sub>6</sub>

-61.35

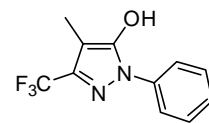

**3a** - <sup>19</sup>F NMR (DMSO-d<sub>6</sub>, 377 MHz)

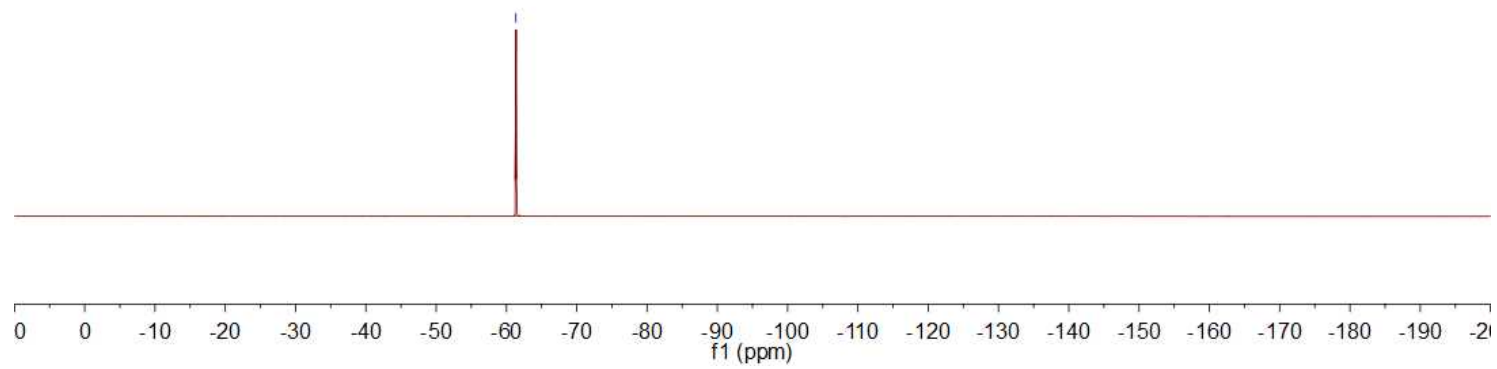

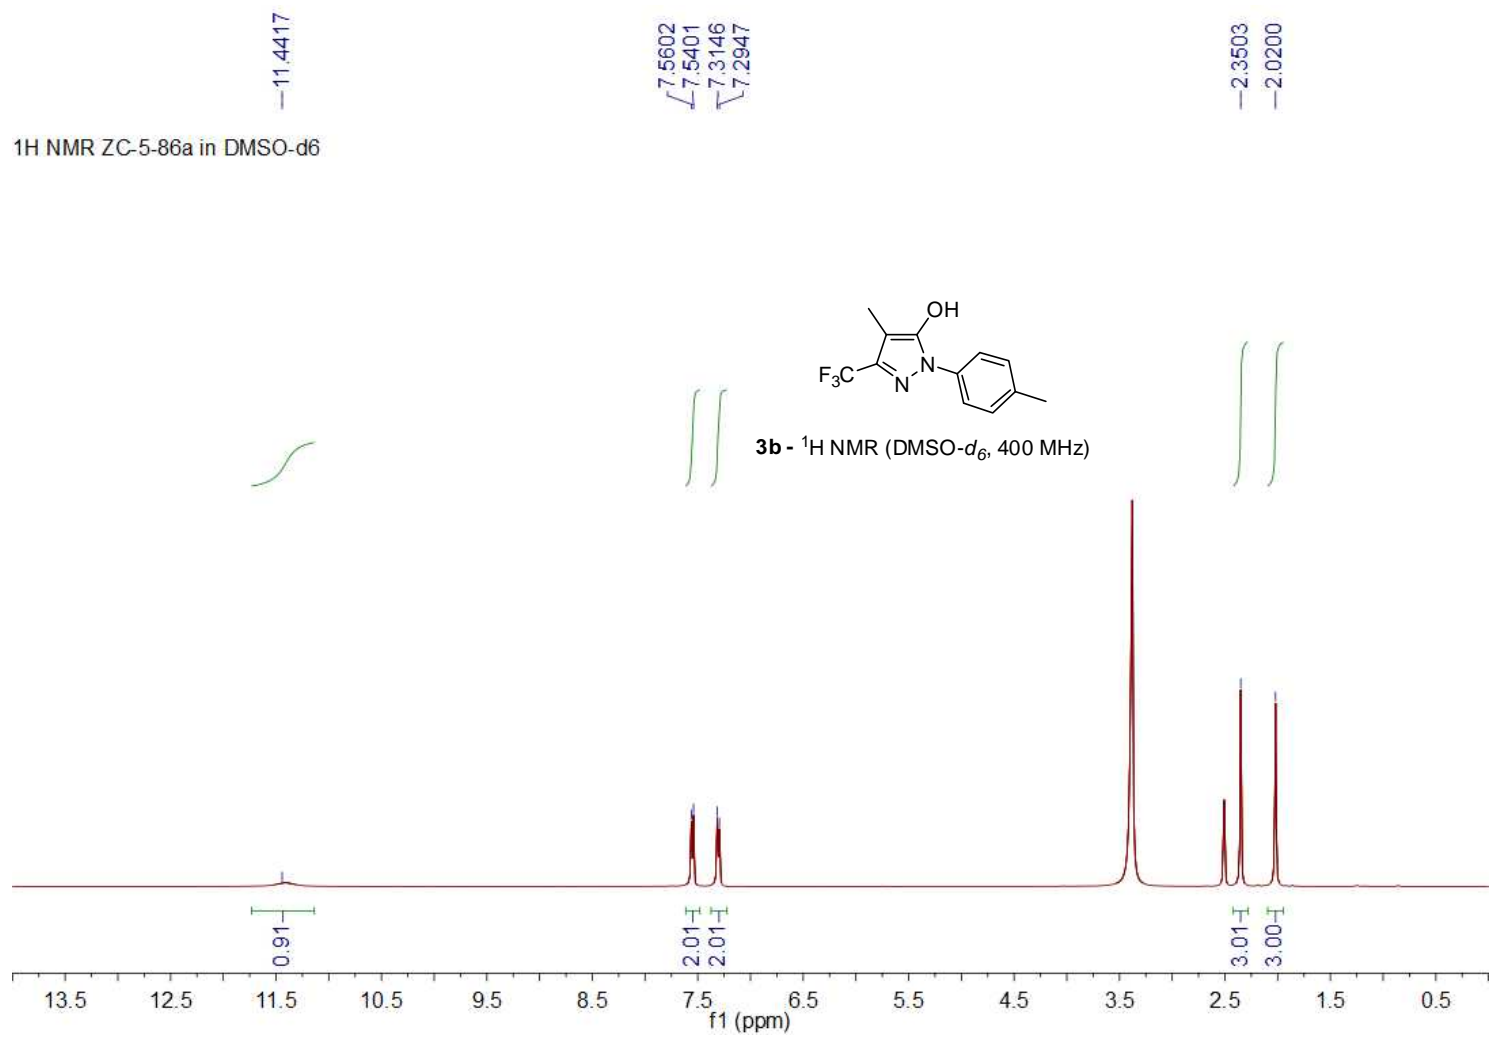

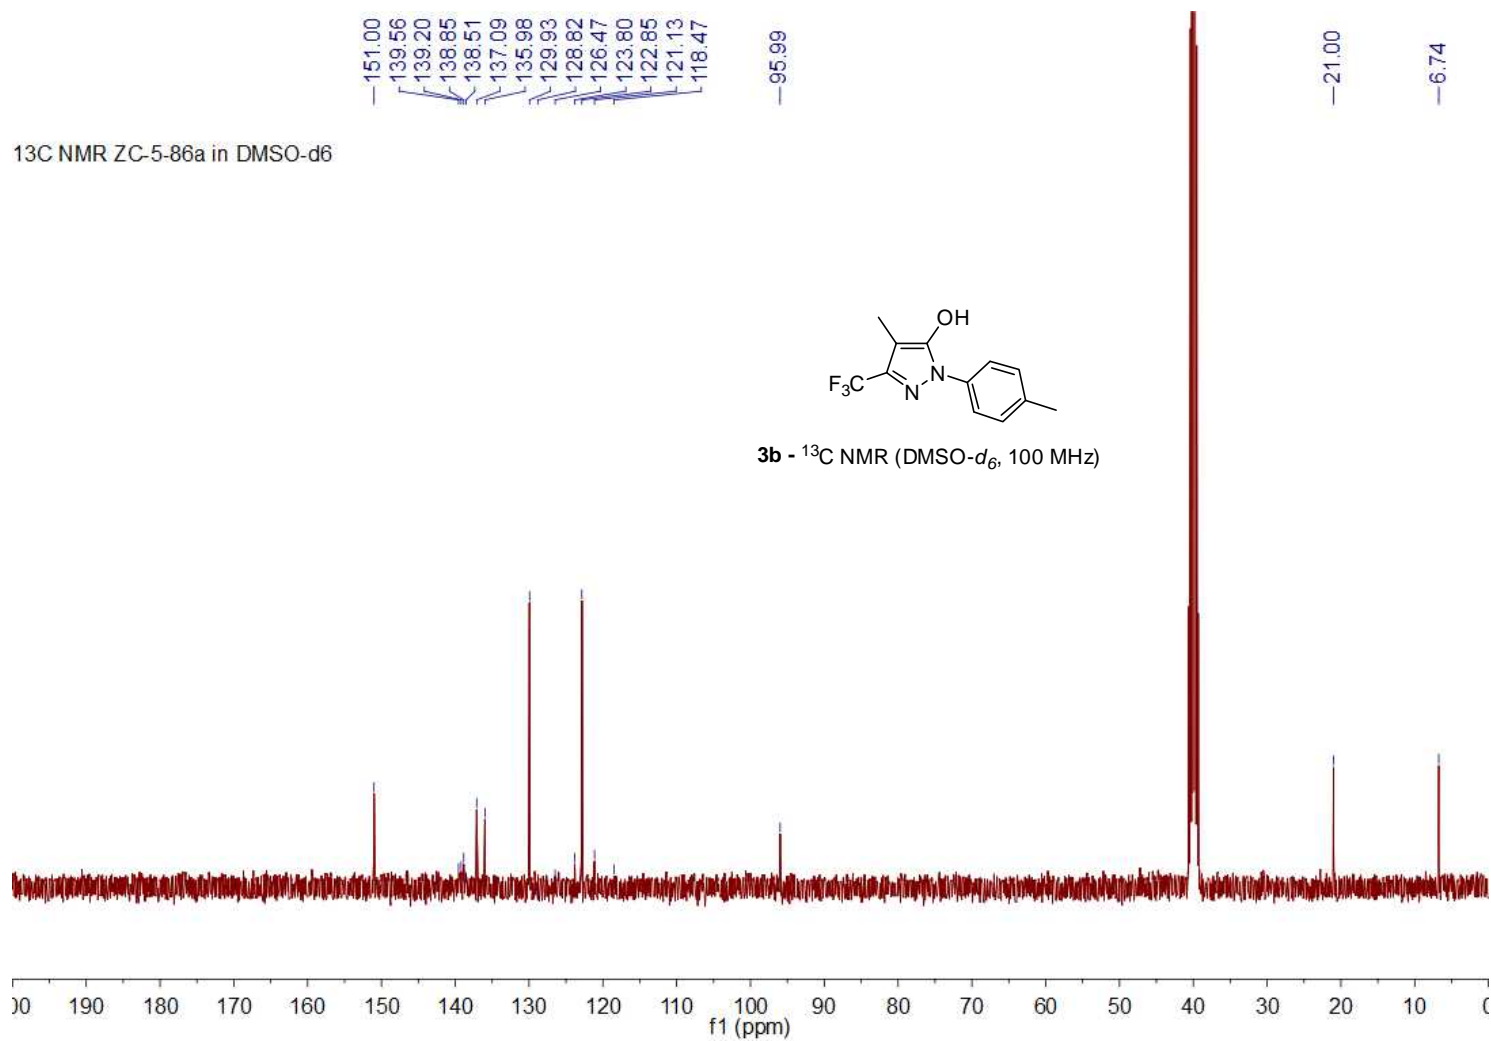

19F NMR ZC-5-86a in DMSO-d6

-61.25

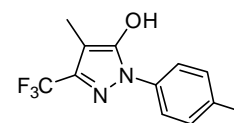

3b - <sup>19</sup>F NMR (DMSO-*d*<sub>6</sub>, 377 MHz)

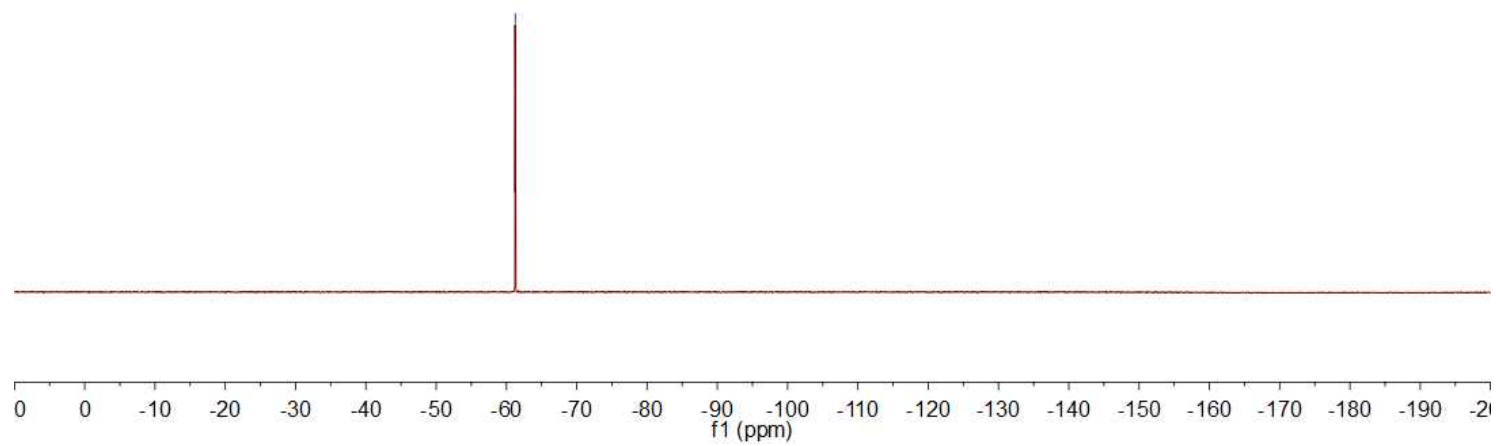

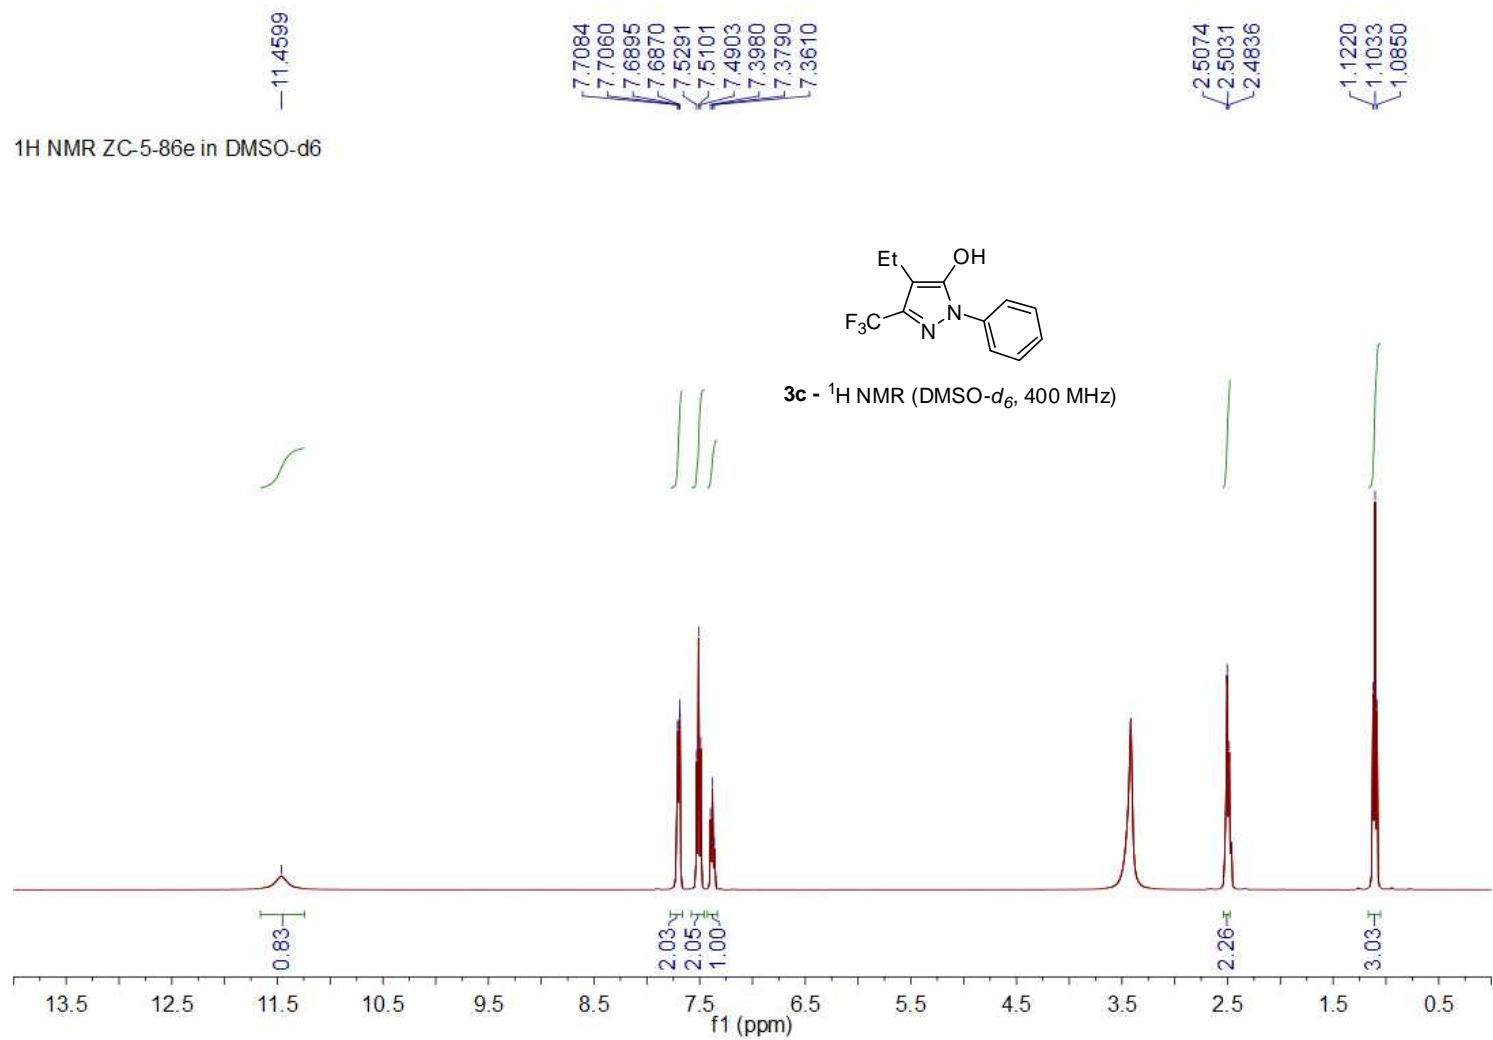

<sup>13</sup>C NMR ZC-5-86e in DMSO-d<sub>6</sub>

150.80  
139.32  
138.97  
138.62  
128.34  
127.65  
126.51  
123.83  
122.95  
121.15  
118.48  
103.12

15.69  
14.96

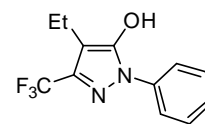

**3c** - <sup>13</sup>C NMR (DMSO-d<sub>6</sub>, 100 MHz)

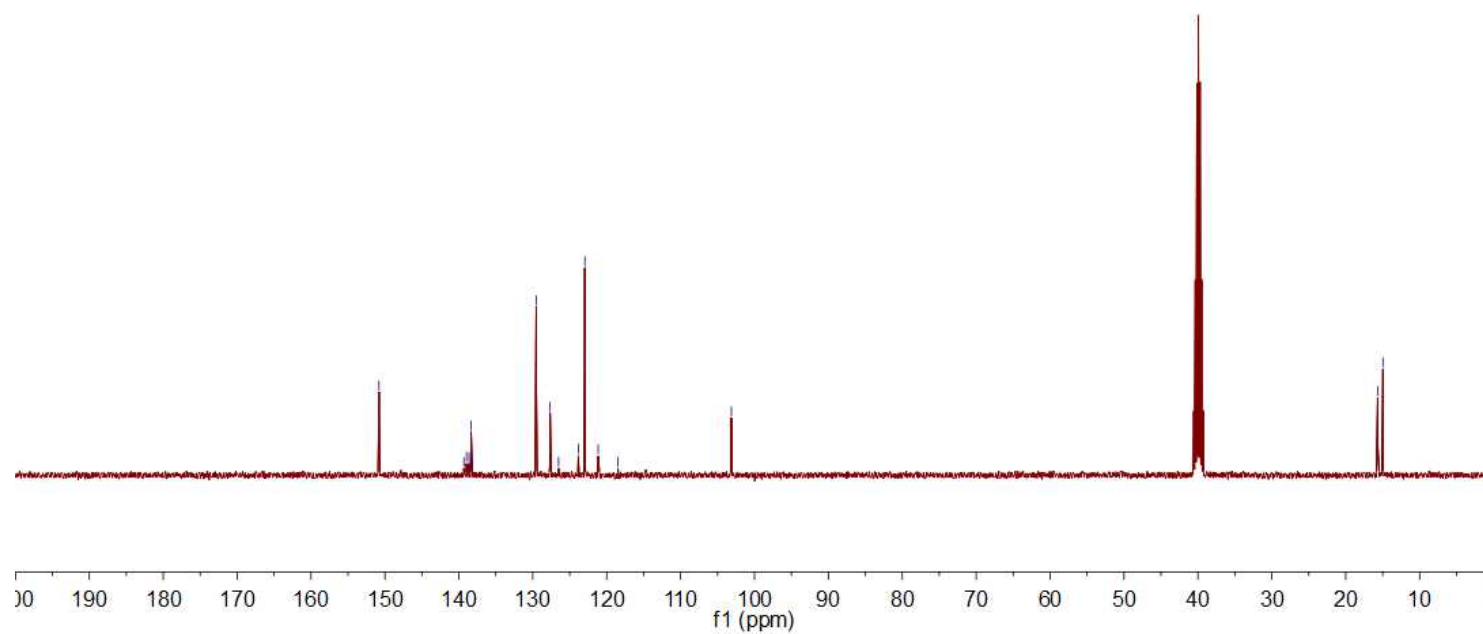



<sup>19</sup>F NMR ZC-5-86e in DMSO-d<sub>6</sub>

60.90

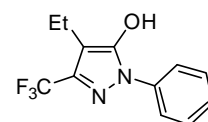

**3c** - <sup>19</sup>F NMR (DMSO-*d*<sub>6</sub>, 377 MHz)

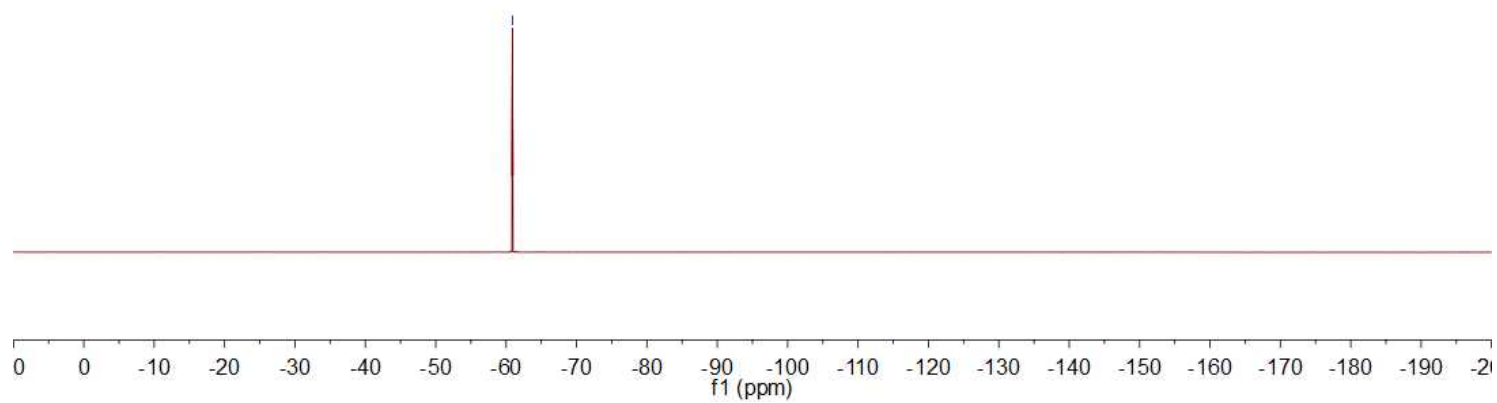

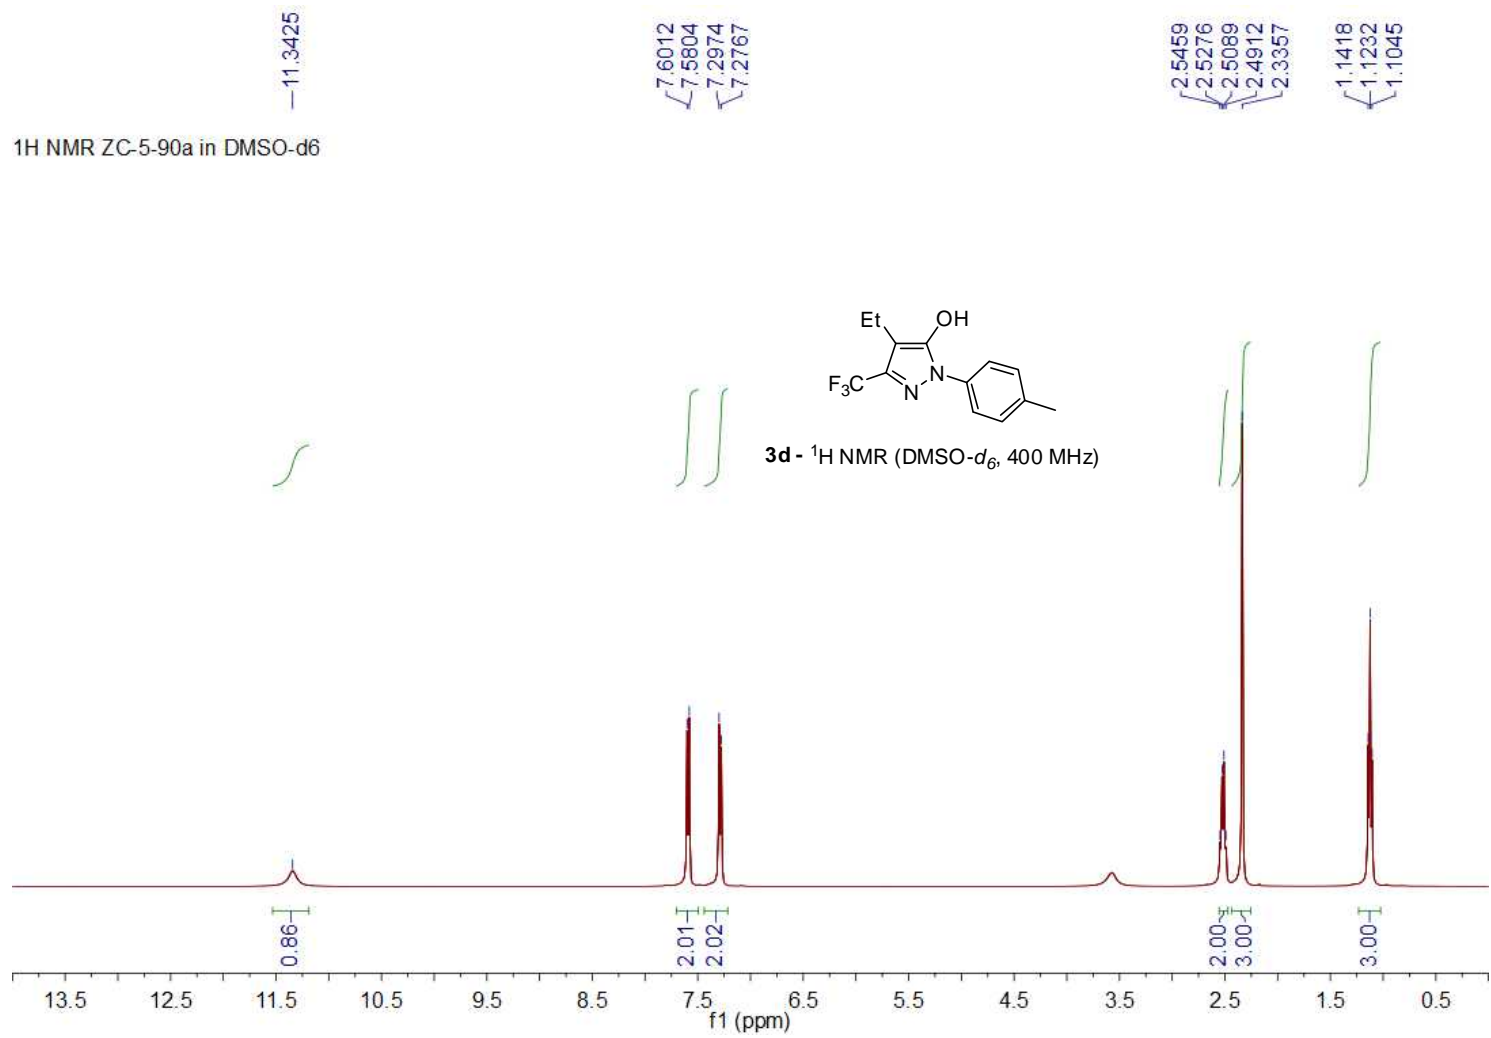

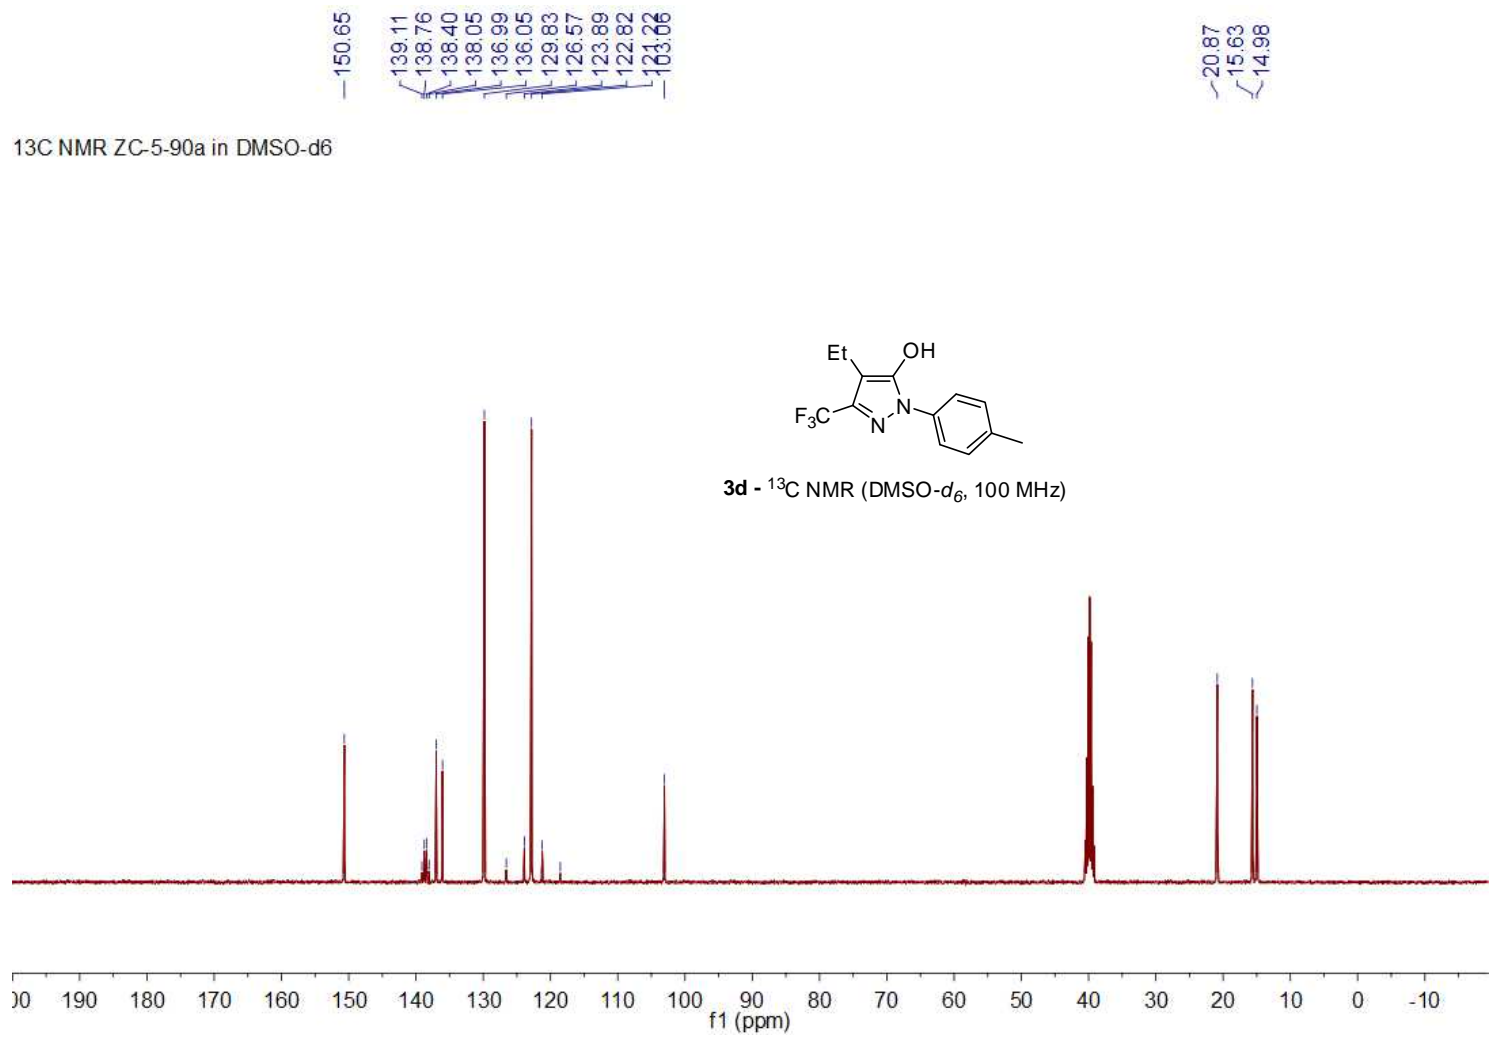

<sup>19</sup>F NMR ZC-5-90a in DMSO-d<sub>6</sub>

—60.95

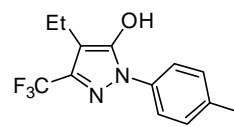

**3d** - <sup>19</sup>F NMR (DMSO-*d*<sub>6</sub>, 377 MHz)

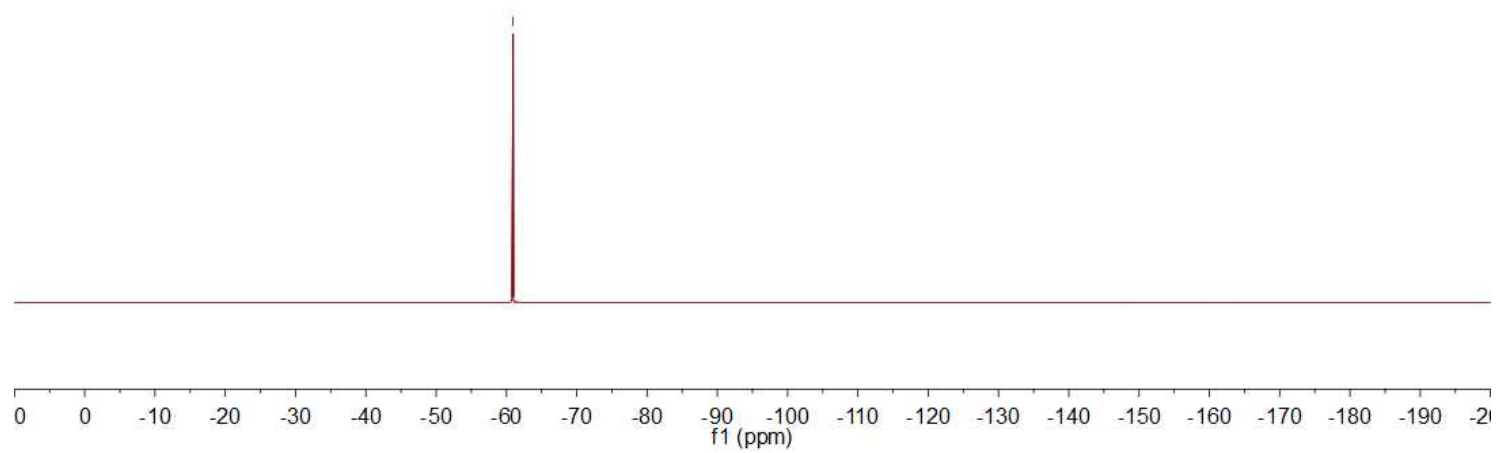

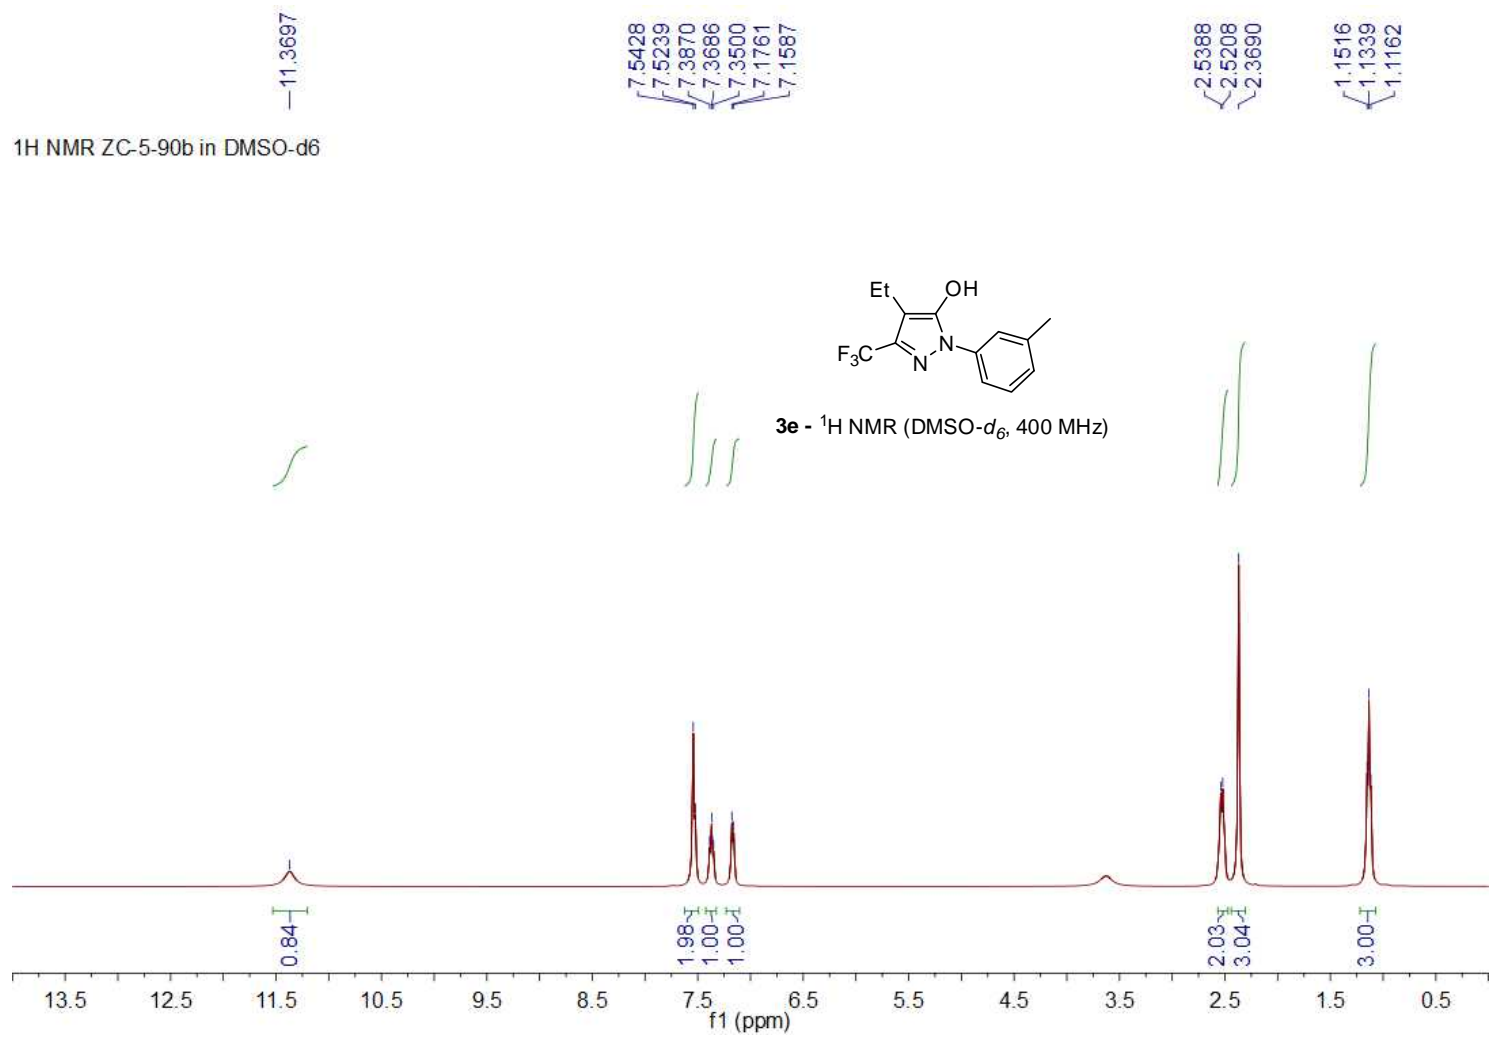

<sup>13</sup>C NMR ZC-5-90b in DMSO-d<sub>6</sub>

150.75  
139.09  
138.84  
138.47  
138.26  
138.33  
128.34  
126.53  
123.85  
123.50  
121.17  
120.12  
118.50  
103.10

21.37  
15.69  
14.97

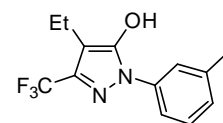

**3e** - <sup>13</sup>C NMR (DMSO-d<sub>6</sub>, 100 MHz)

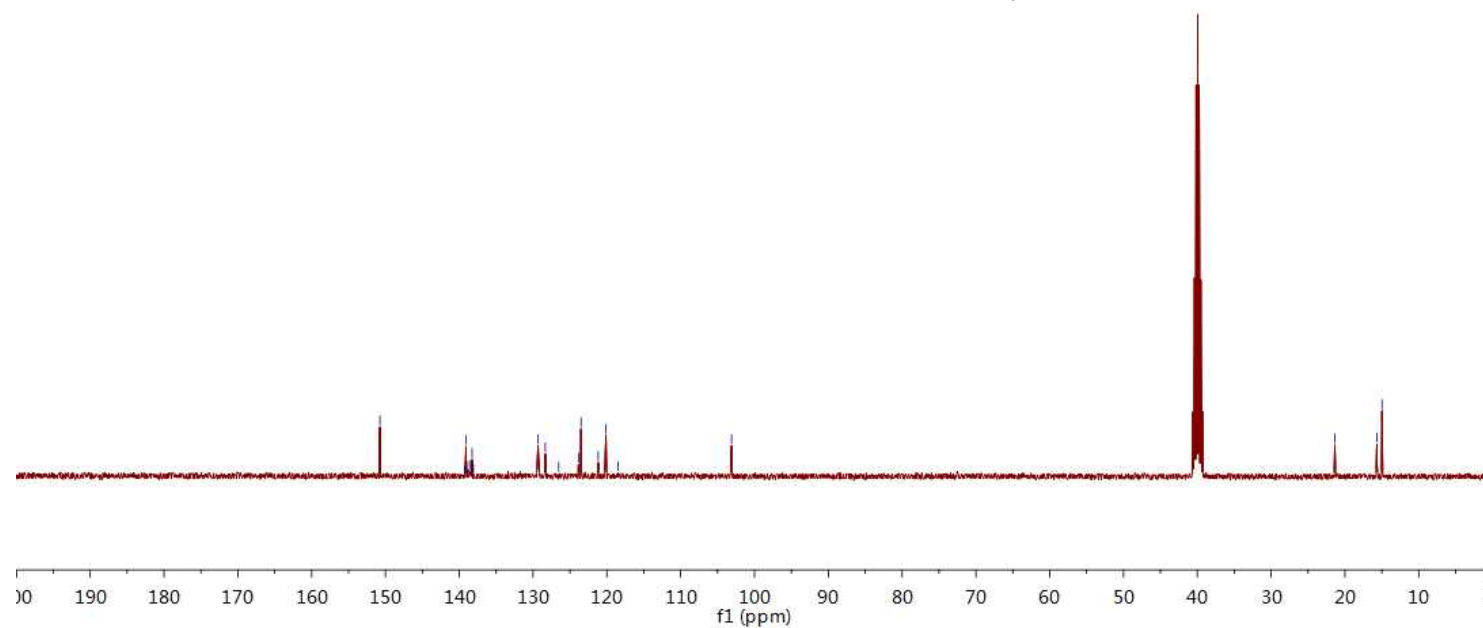

19F NMR ZC-5-90b in DMSO-d6

--61.02

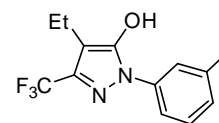

**3e** -<sup>19</sup>F NMR (DMSO-*d*<sub>6</sub>, 377 MHz)

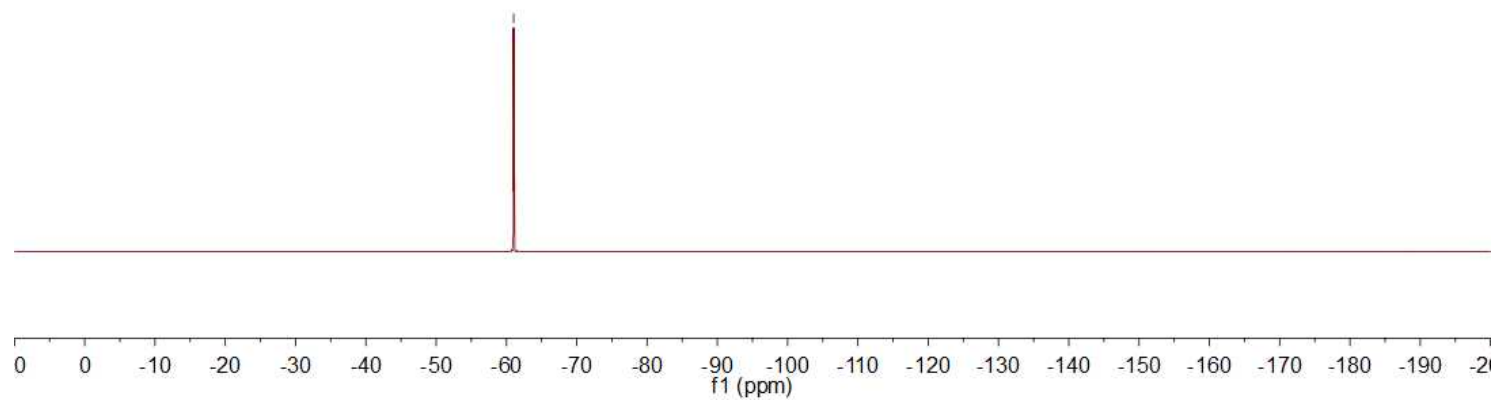

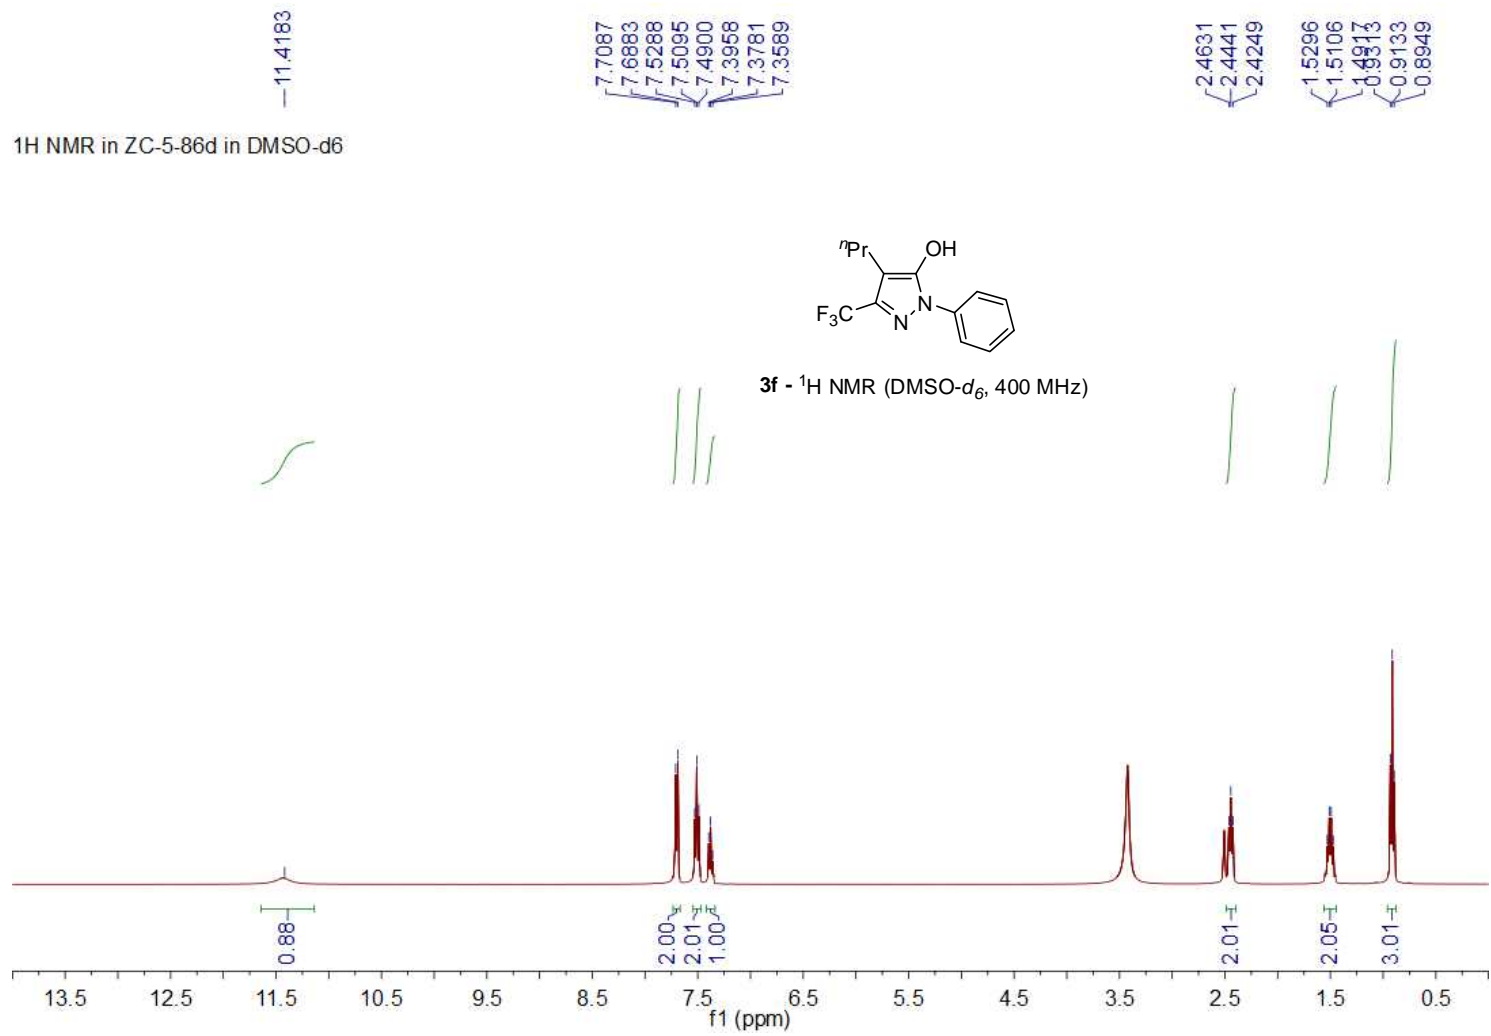



<sup>13</sup>C NMR in ZC-5-86d in DMSO-d<sub>6</sub>

151.12  
139.20  
138.85  
138.49  
138.35  
129.53  
127.63  
126.50  
123.82  
122.93  
121.15  
118.43

101.48

23.82  
23.55

14.05

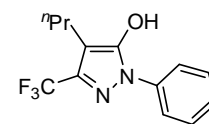

**3f** - <sup>13</sup>C NMR (DMSO-d<sub>6</sub>, 100 MHz)

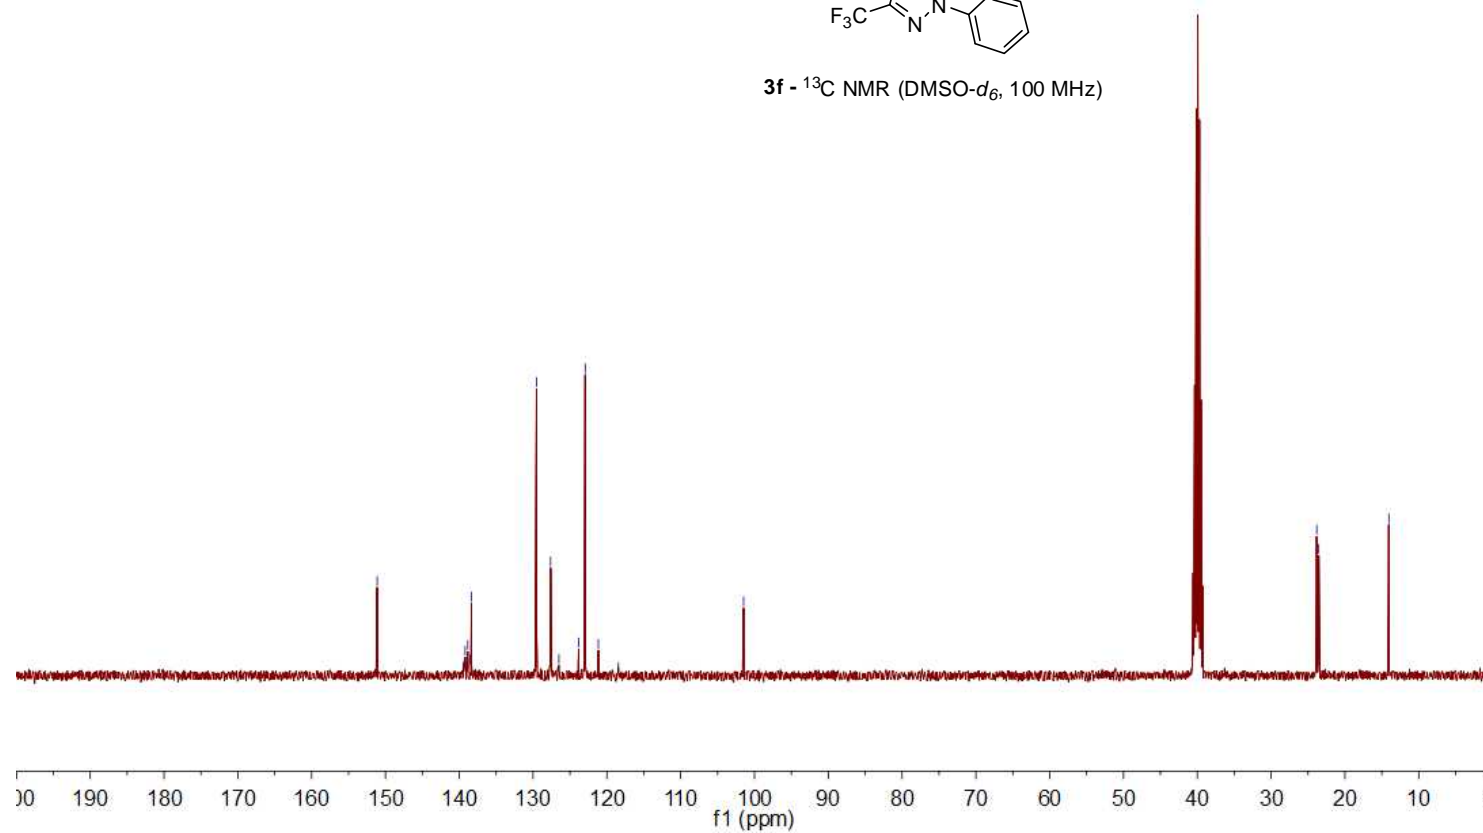

<sup>19</sup>F NMR in ZC-5-86d in DMSO-d<sub>6</sub>

—60.72

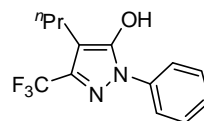

**3f** - <sup>19</sup>F NMR (DMSO-d<sub>6</sub>, 377 MHz)

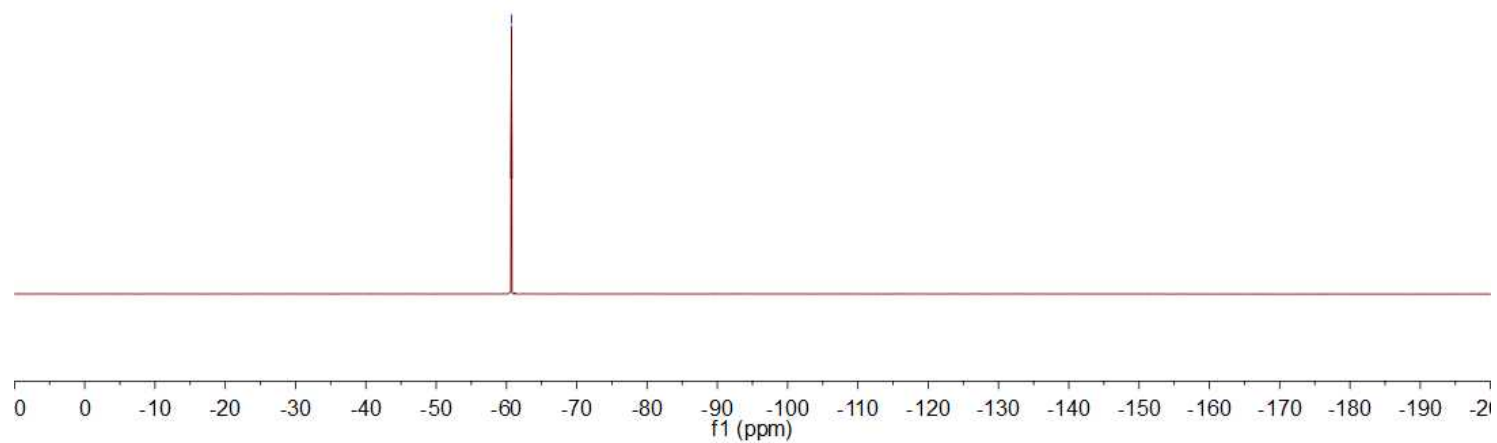

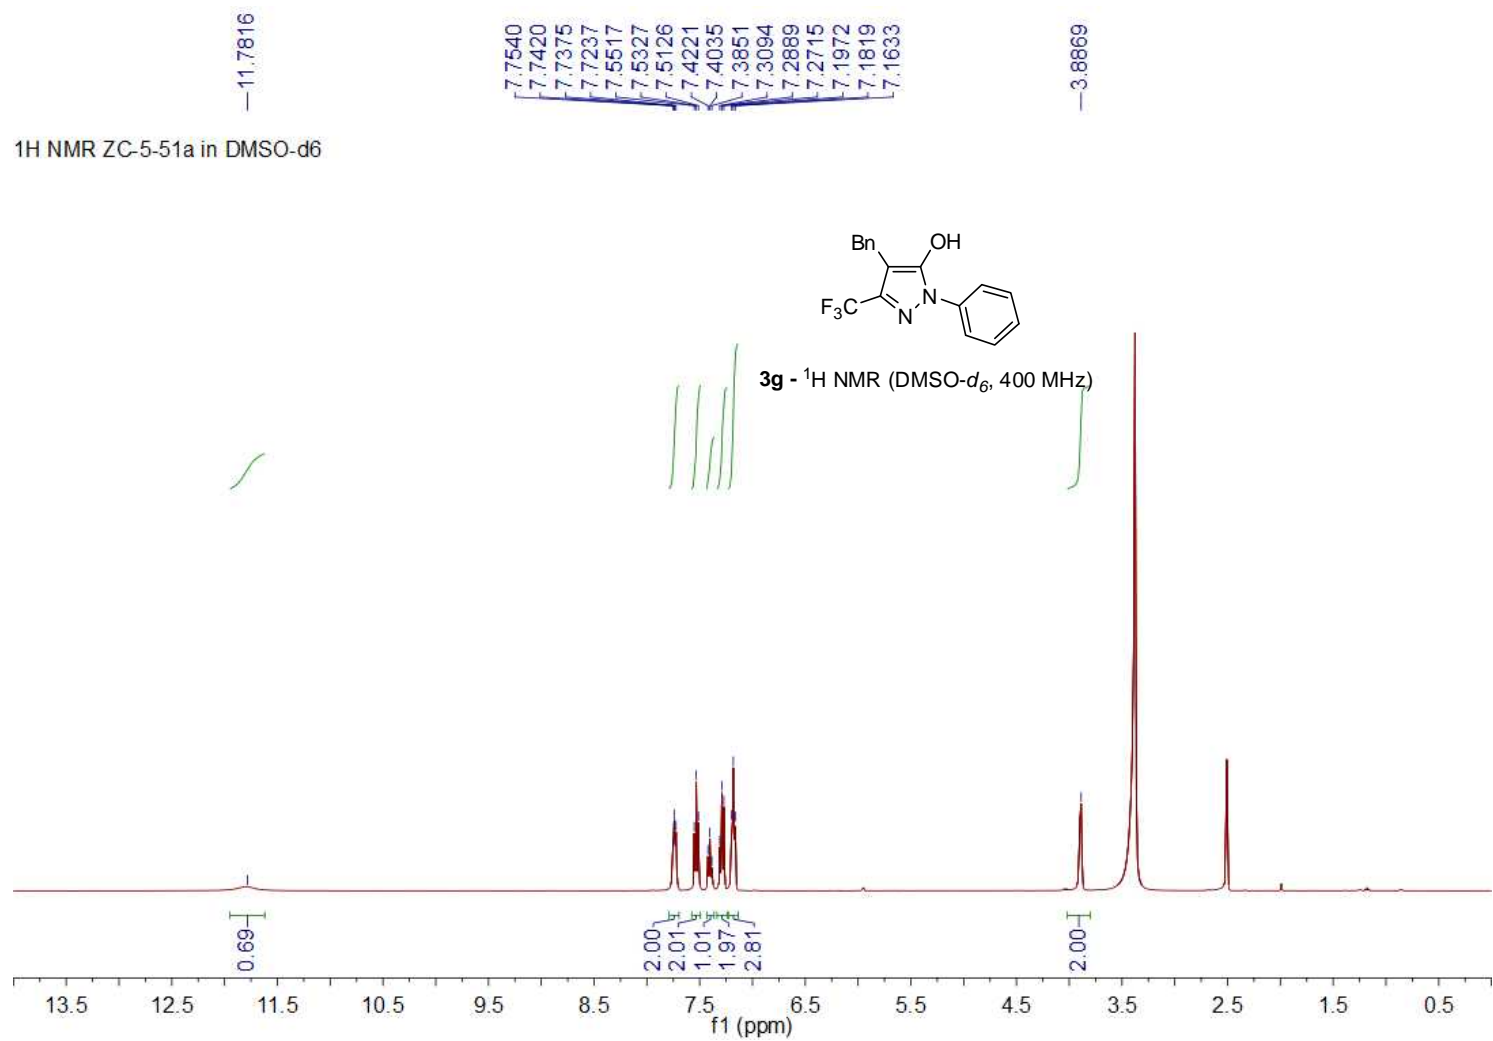

<sup>13</sup>C NMR ZC-5-51a in DMSO-d<sub>6</sub>

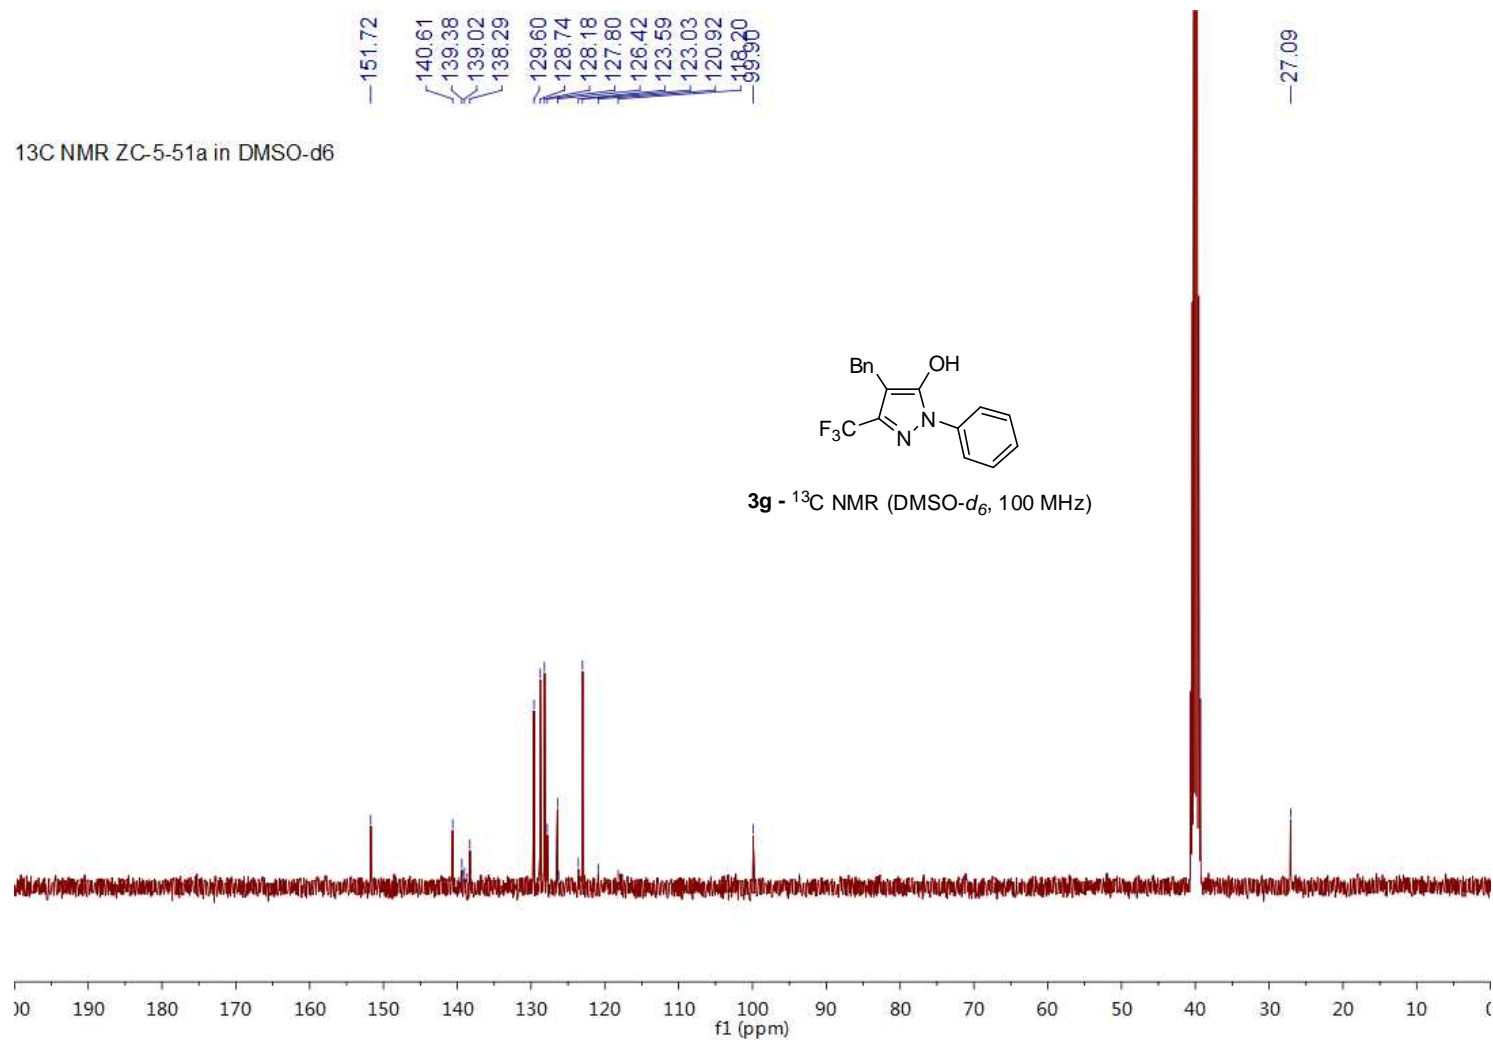

19F NMR ZC-5-51a in DMSO-d6

89.09

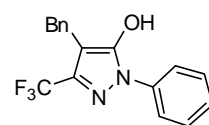

**3g** - <sup>19</sup>F NMR (DMSO-*d*<sub>6</sub>, 377 MHz)

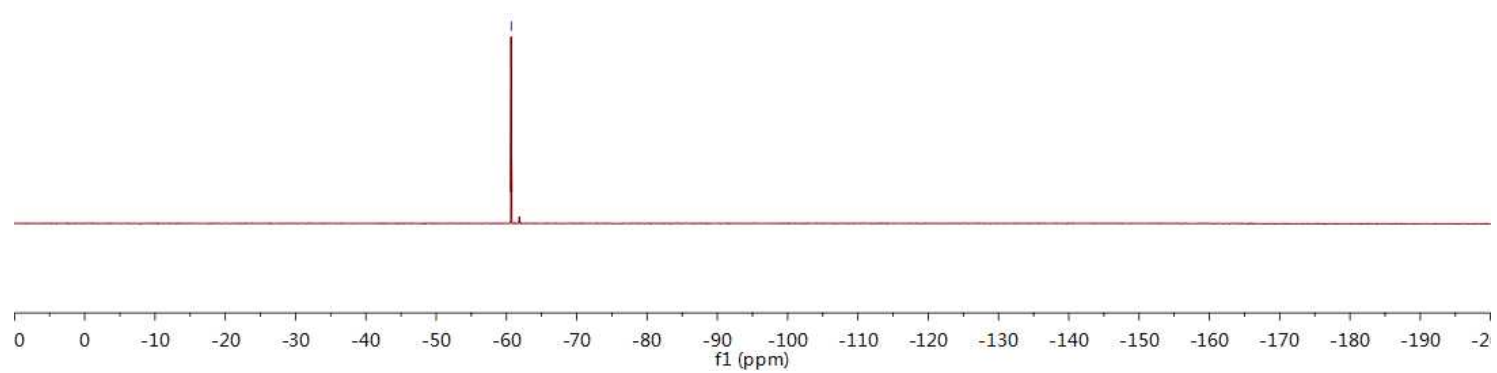

7.7804  
7.7602  
7.3822  
7.3630  
7.3425  
7.1787  
7.1604  
7.1417

5.1565  
5.1381  
4.1258  
4.1191  
4.1011  
4.0830  
4.0769  
4.0653  
4.0583  
3.2146  
3.1902  
3.1706  
3.1465  
2.8669  
2.8592  
2.8229  
2.8152

<sup>1</sup>H NMR ZC-5-78 in CDCl<sub>3</sub>

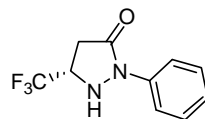

**2a** - <sup>1</sup>H NMR (CDCl<sub>3</sub>, 400 MHz)

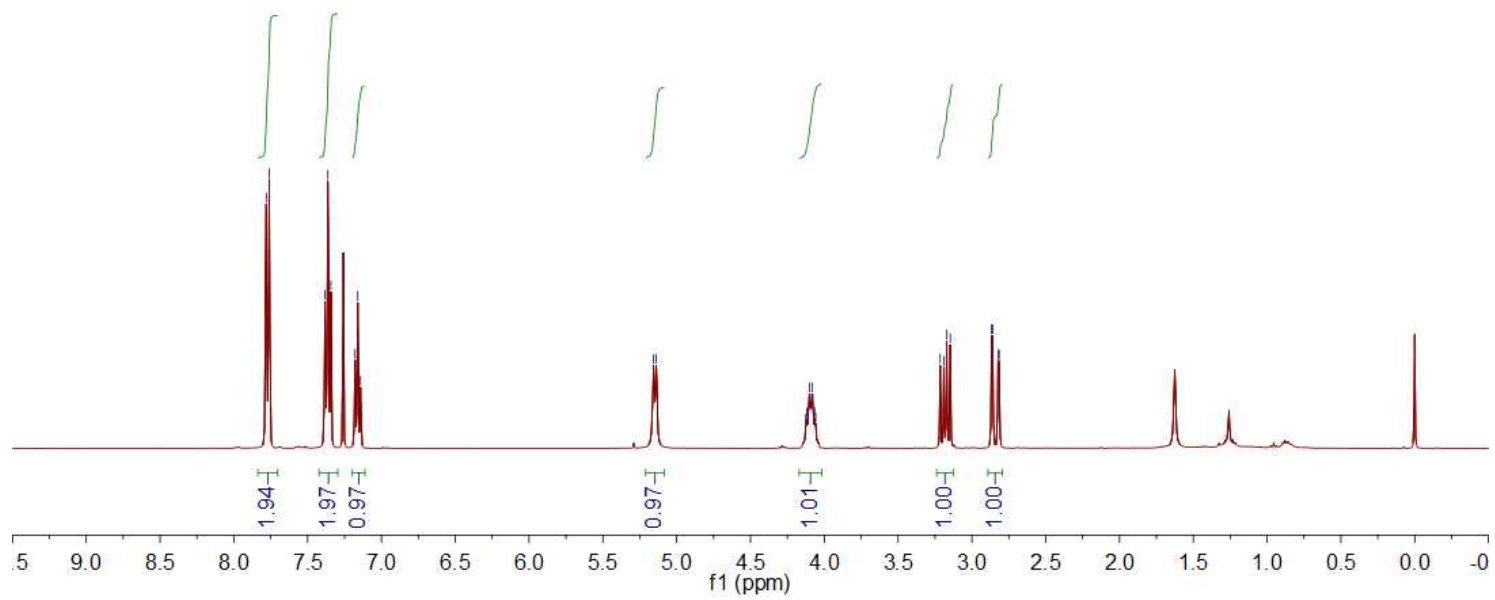

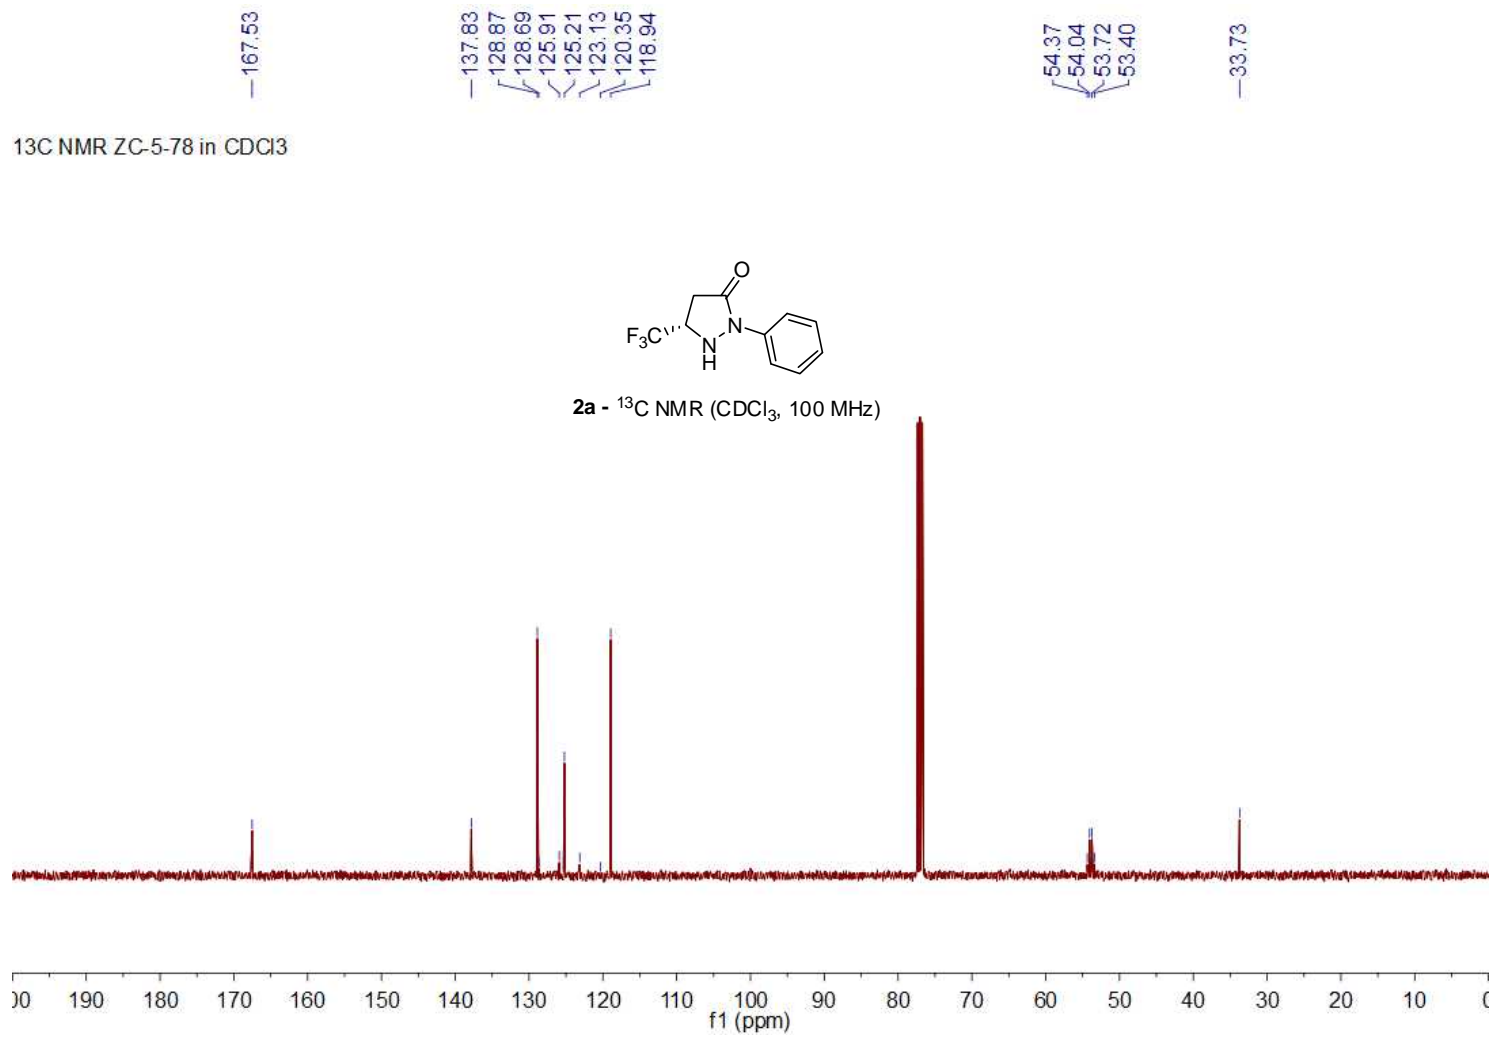

<sup>19</sup>F NMR ZC-5-78 in CDCl<sub>3</sub>

-78.38

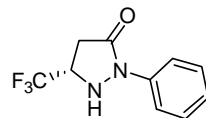

**2a** - <sup>19</sup>F NMR (CDCl<sub>3</sub>, 377 MHz)

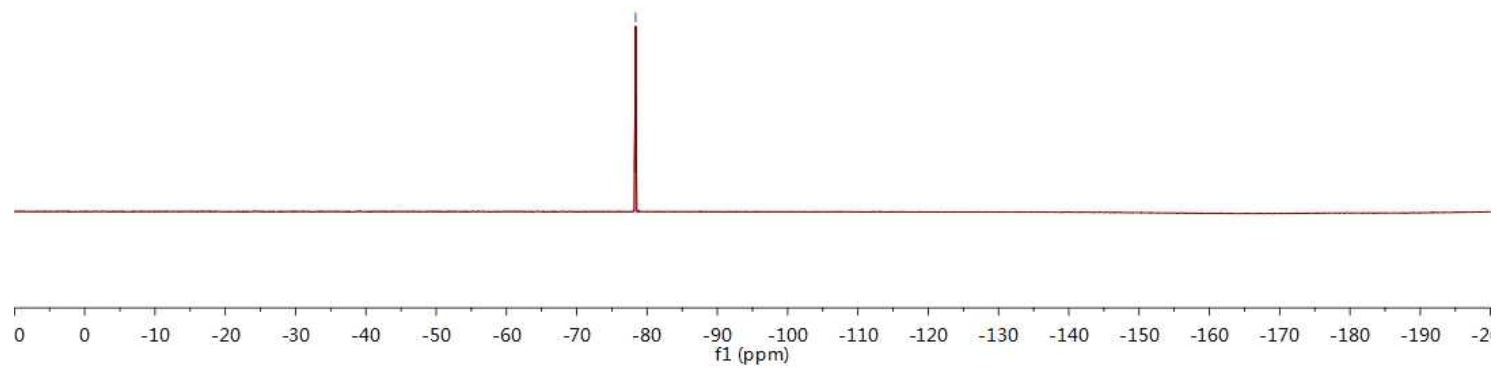



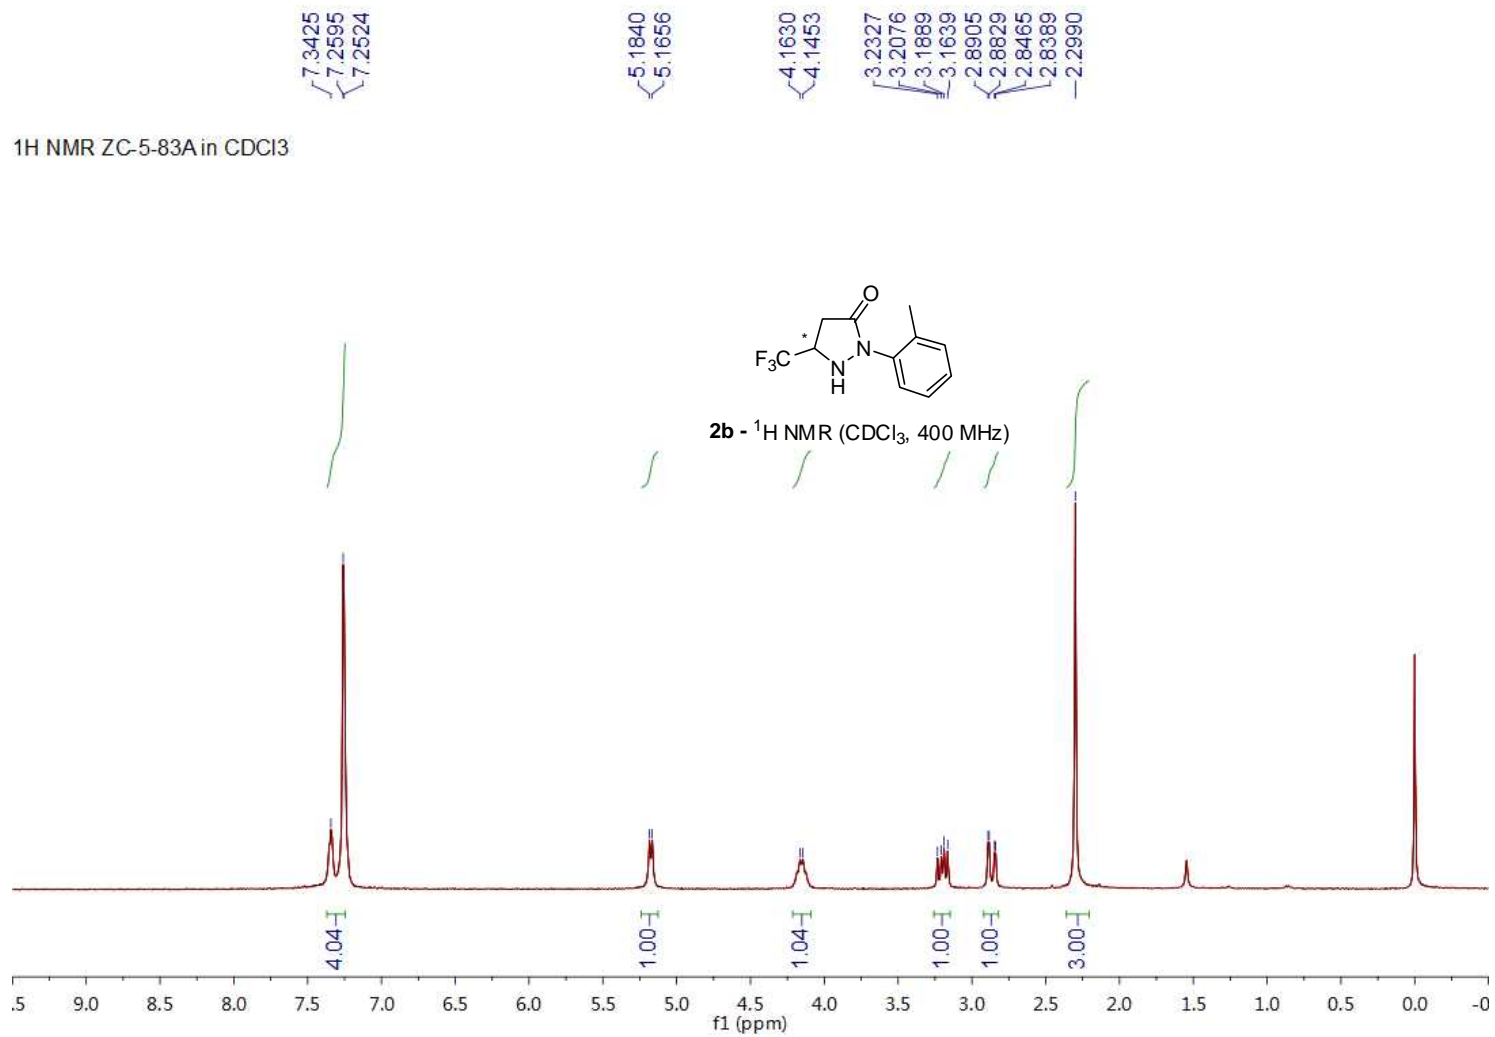

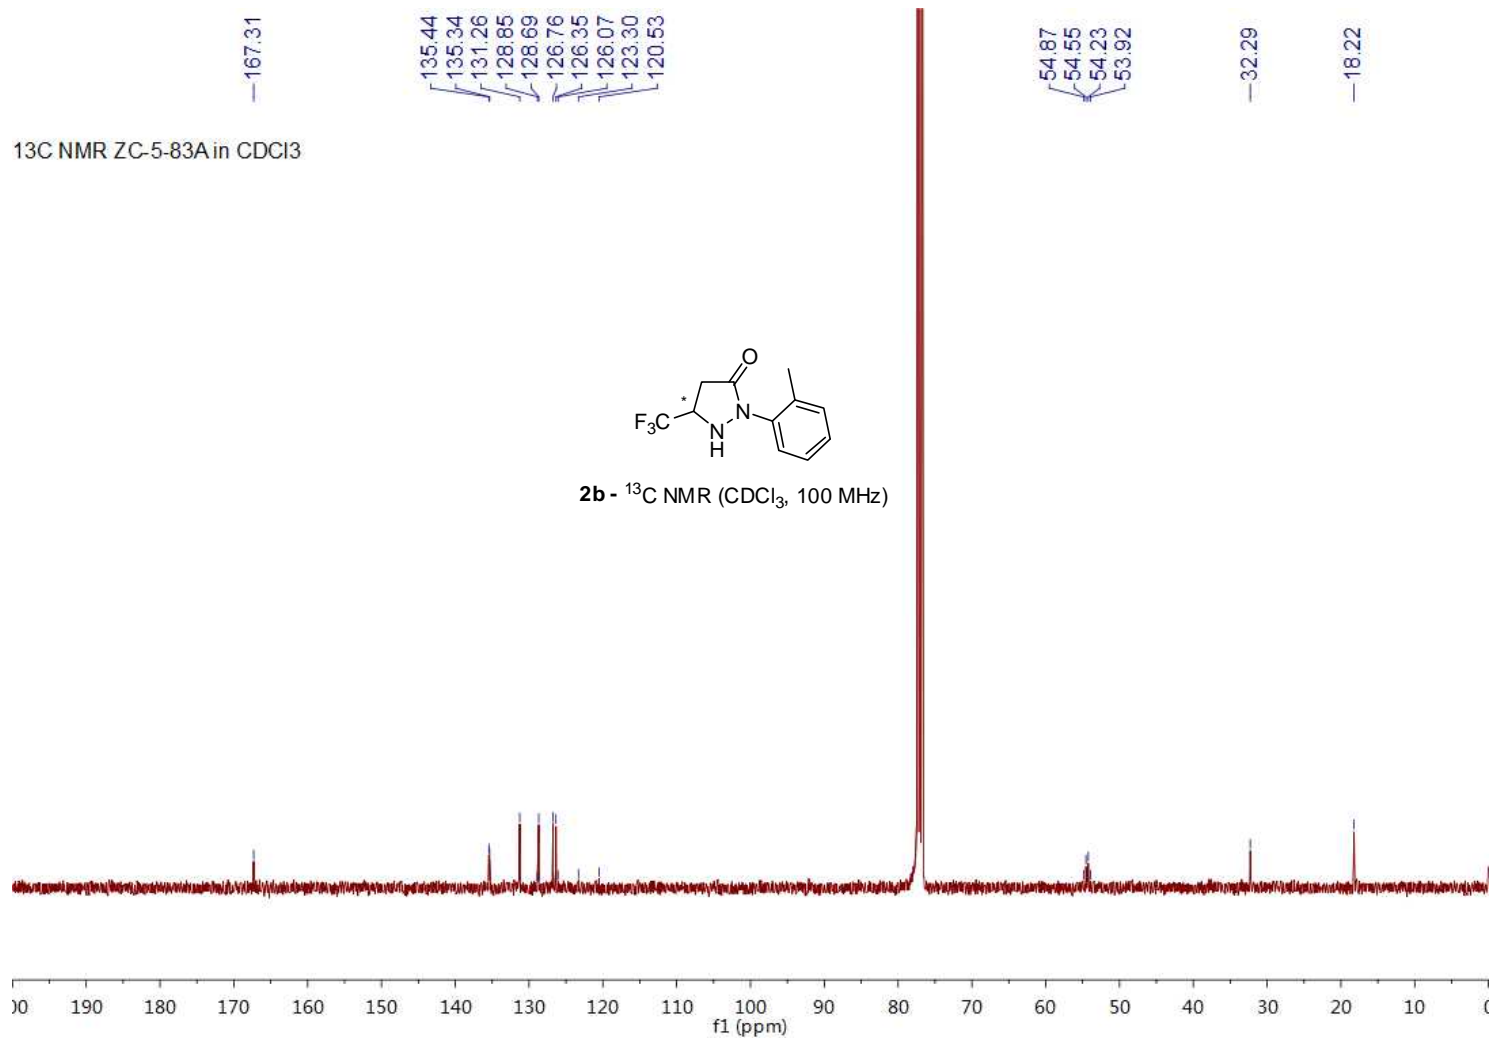

<sup>19</sup>F NMR ZC-5-83A in CDCl<sub>3</sub>

--78.02

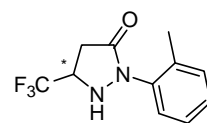

**2b** - <sup>19</sup>F NMR (CDCl<sub>3</sub>, 377 MHz)

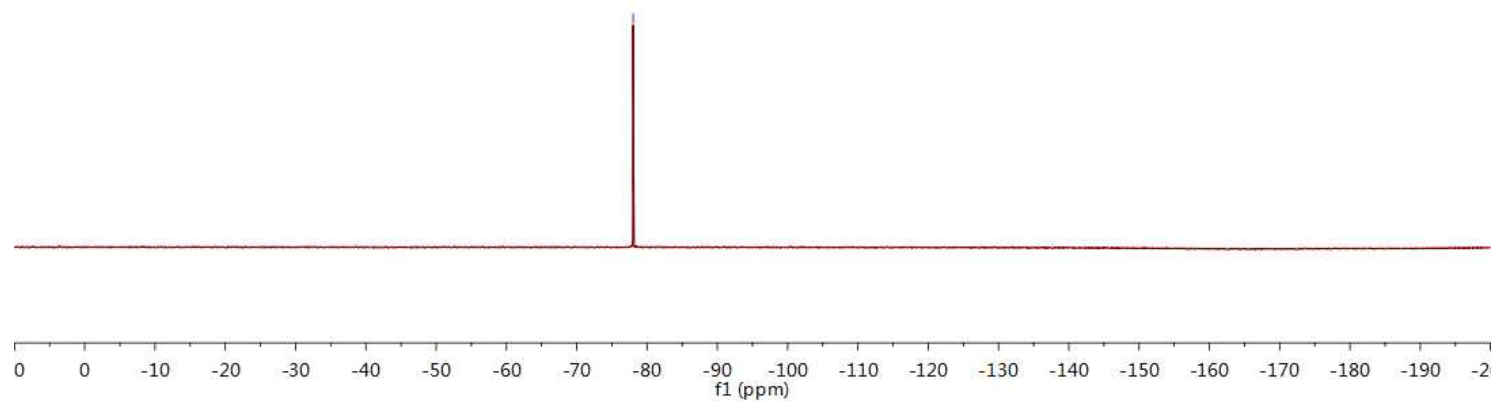

7.5719  
7.5517  
7.2556  
7.2370  
7.2174  
6.9846  
6.9653

5.1427  
4.0961  
4.0851  
4.0787  
4.0609  
4.0432  
4.0368  
4.0264  
4.0179  
3.1439  
3.1198  
2.8426  
2.8347  
2.7986  
2.3999

<sup>1</sup>H NMR ZC-5-81B in CDCl<sub>3</sub>

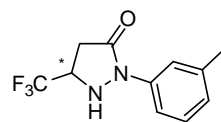

**2c** - <sup>1</sup>H NMR (CDCl<sub>3</sub>, 400 MHz)

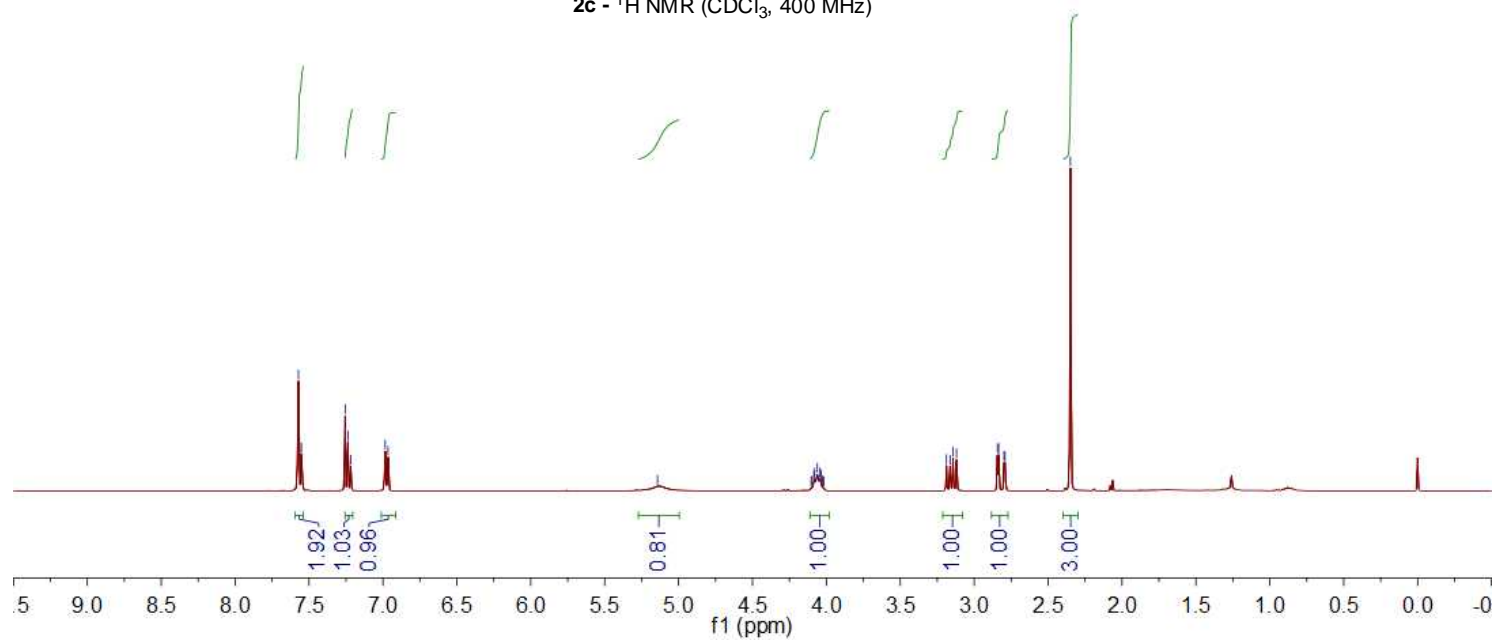

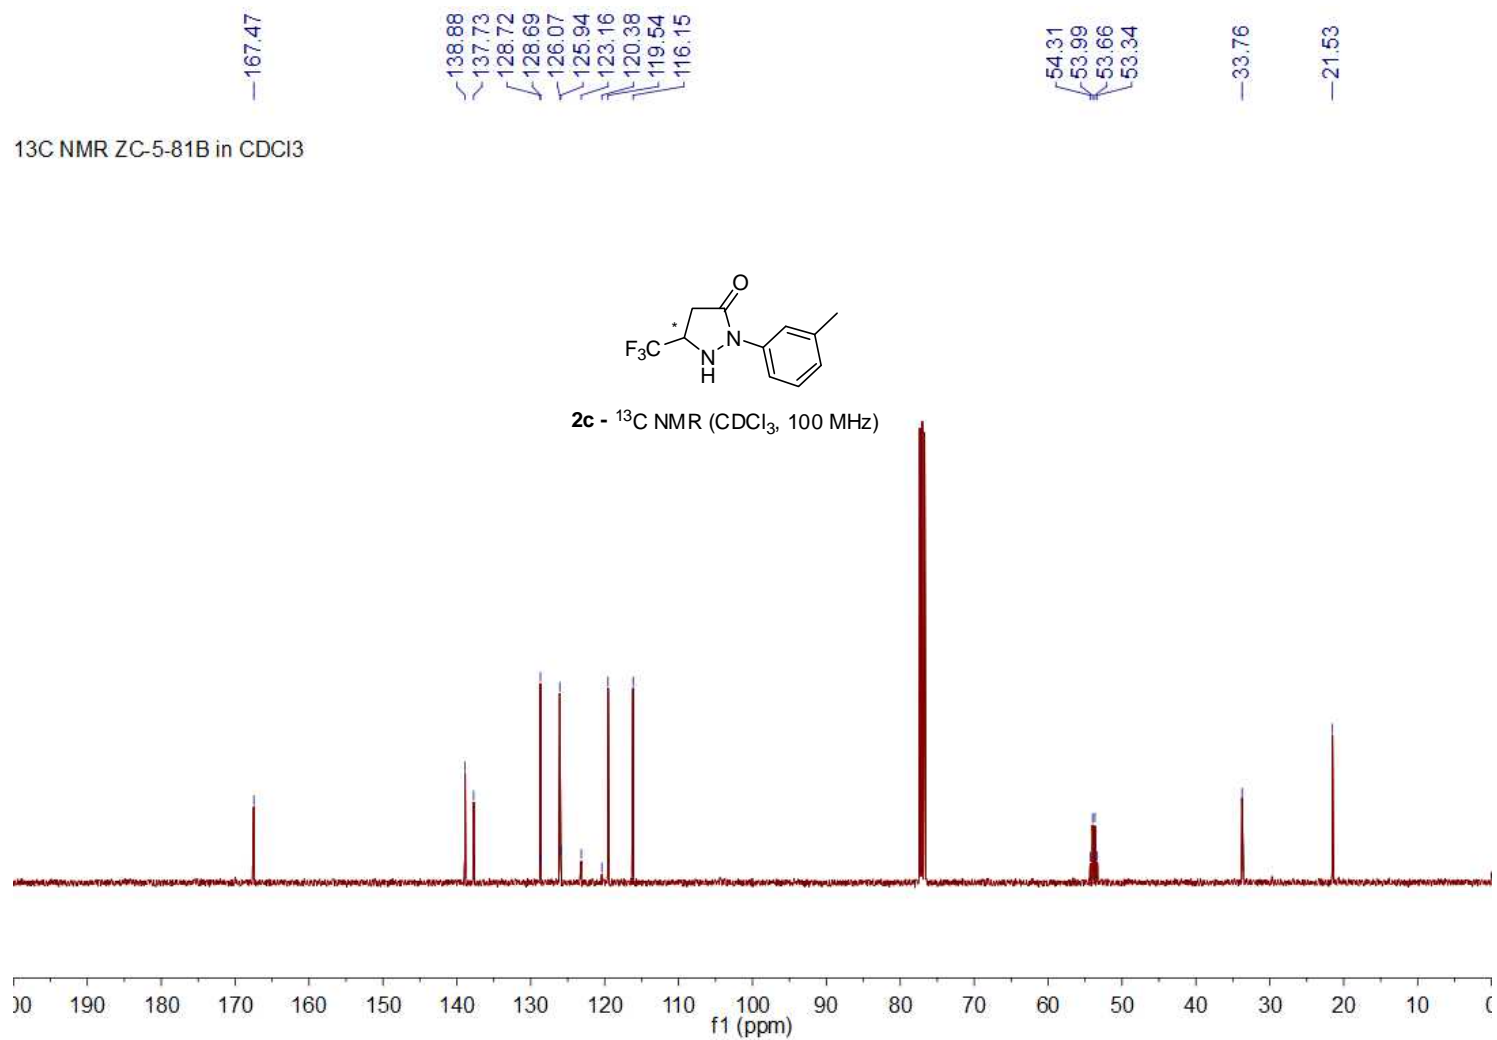

<sup>19</sup>F NMR ZC-5-81B in CDCl<sub>3</sub>

---78.40

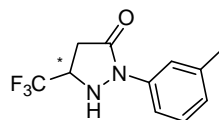

**2c** - <sup>19</sup>F NMR (CDCl<sub>3</sub>, 377 MHz)

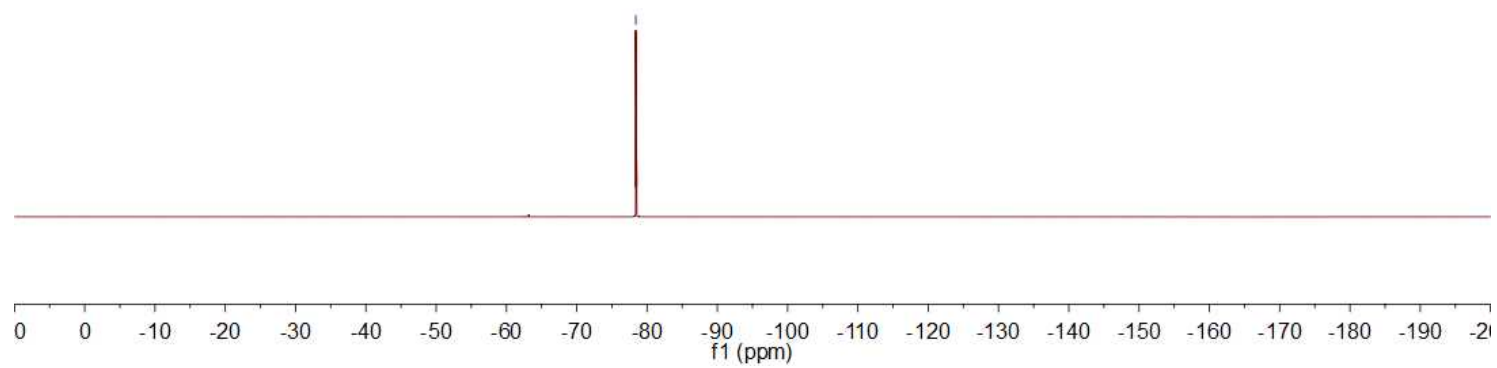

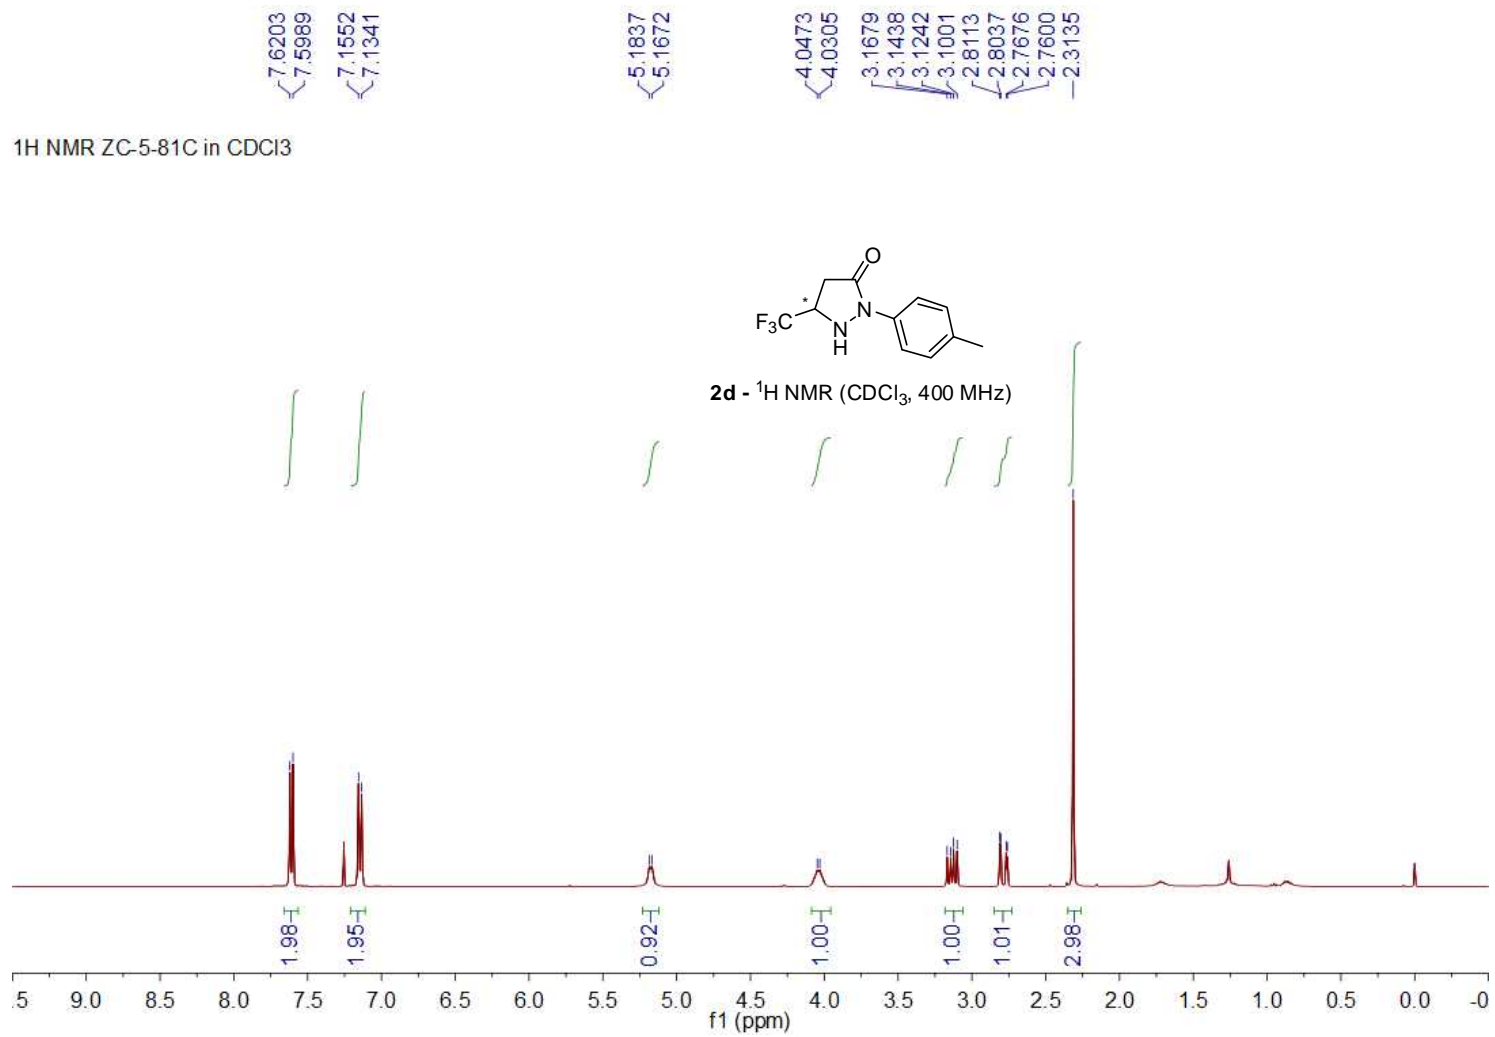

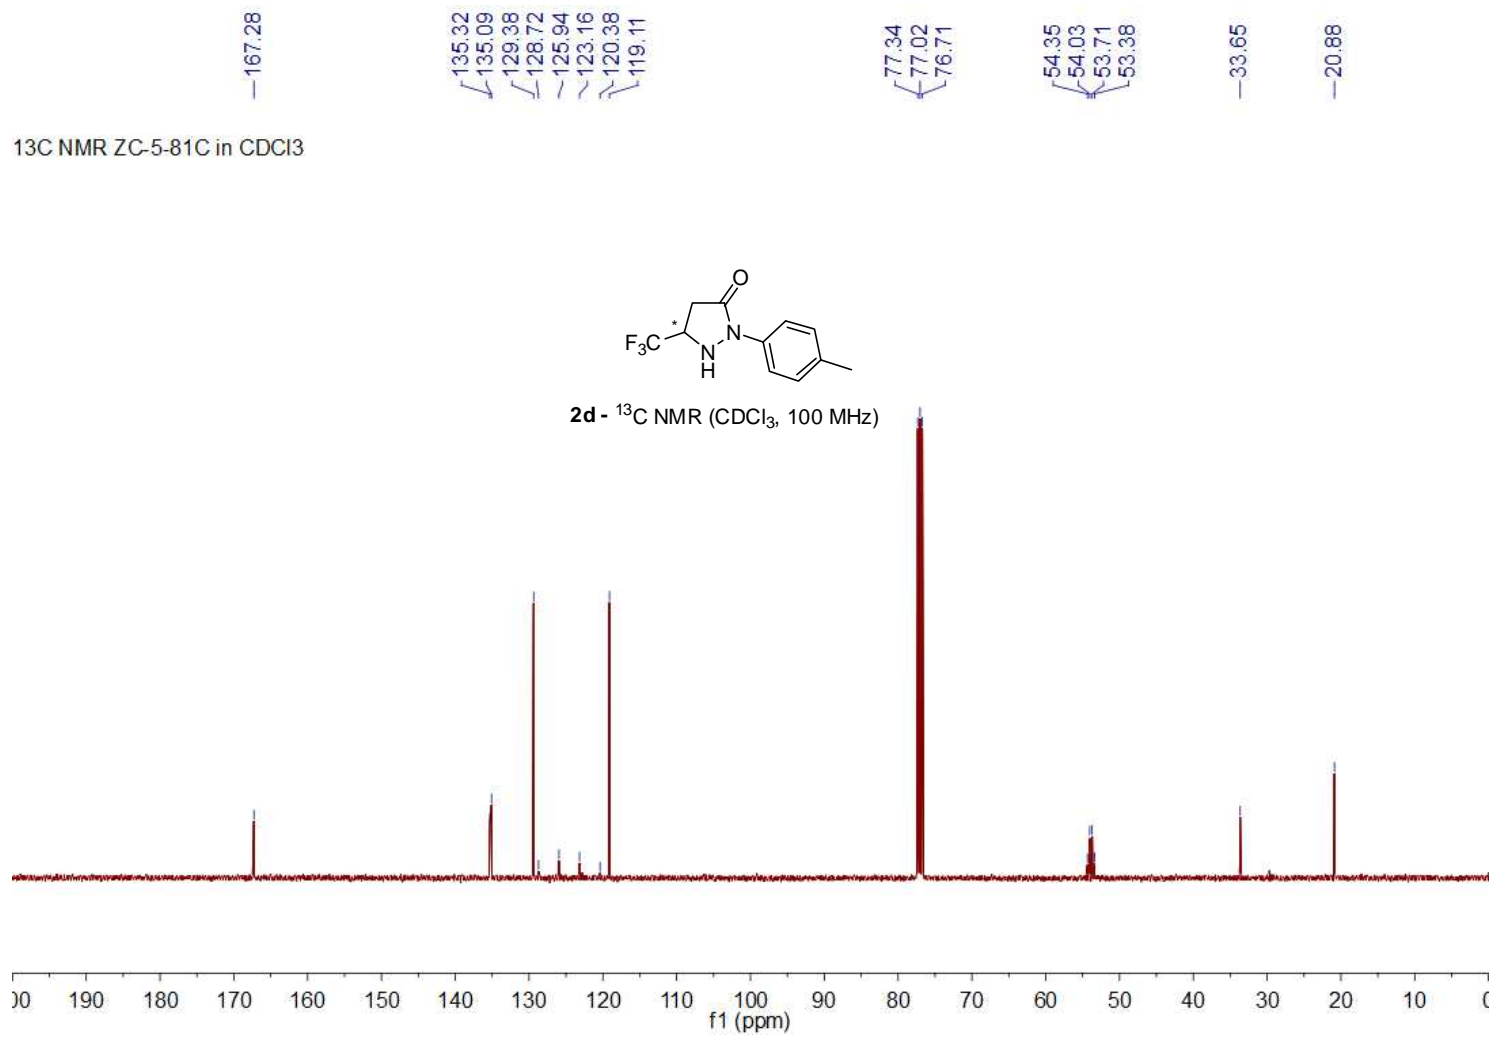



<sup>19</sup>F NMR ZC-5-81C in CDCl<sub>3</sub>

---78.48

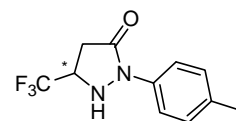

**2d** - <sup>19</sup>F NMR (CDCl<sub>3</sub>, 377 MHz)

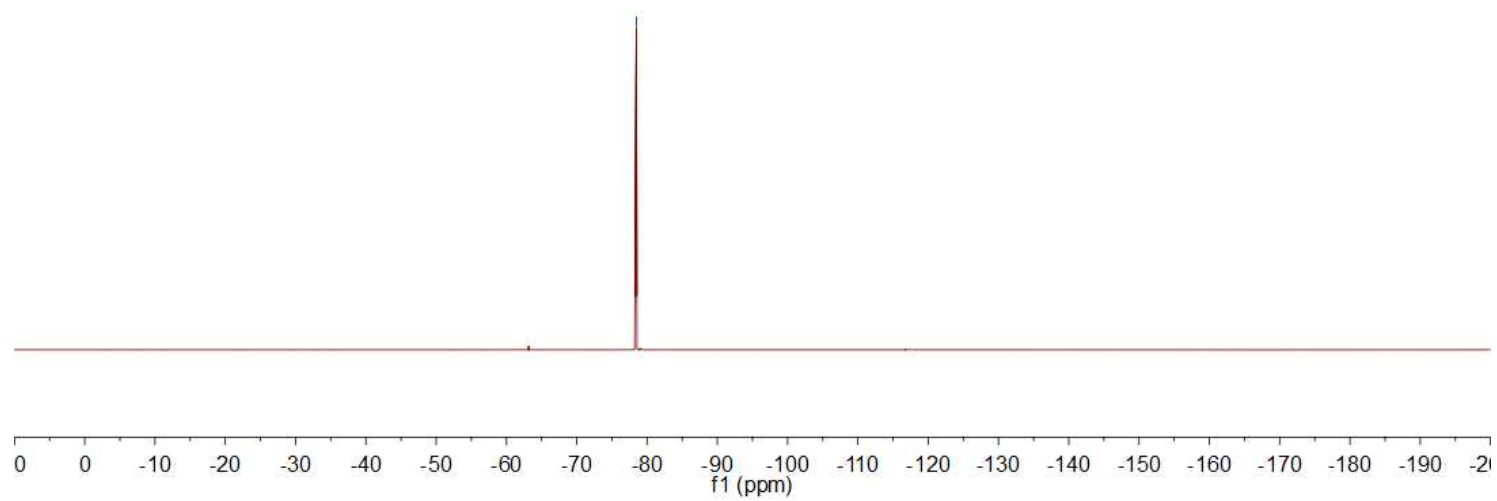

<sup>1</sup>H NMR ZC-5-81E in CDCl<sub>3</sub>

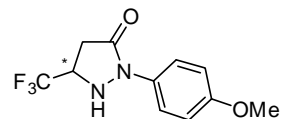

**2e** - <sup>1</sup>H NMR (CDCl<sub>3</sub>, 400 MHz)

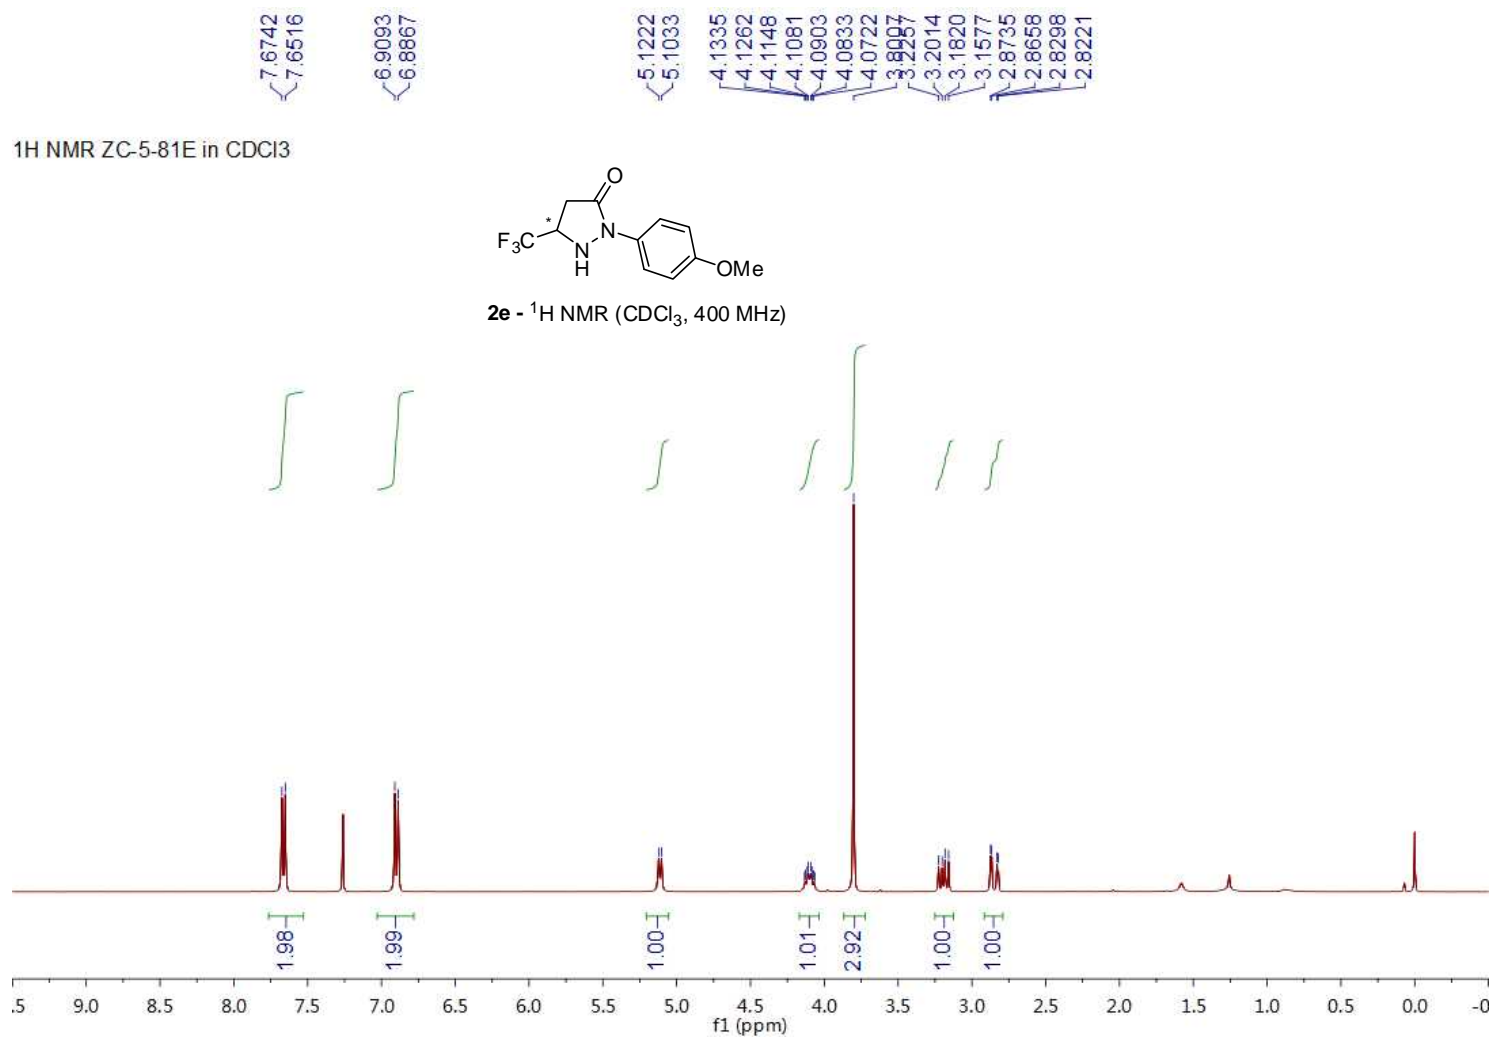

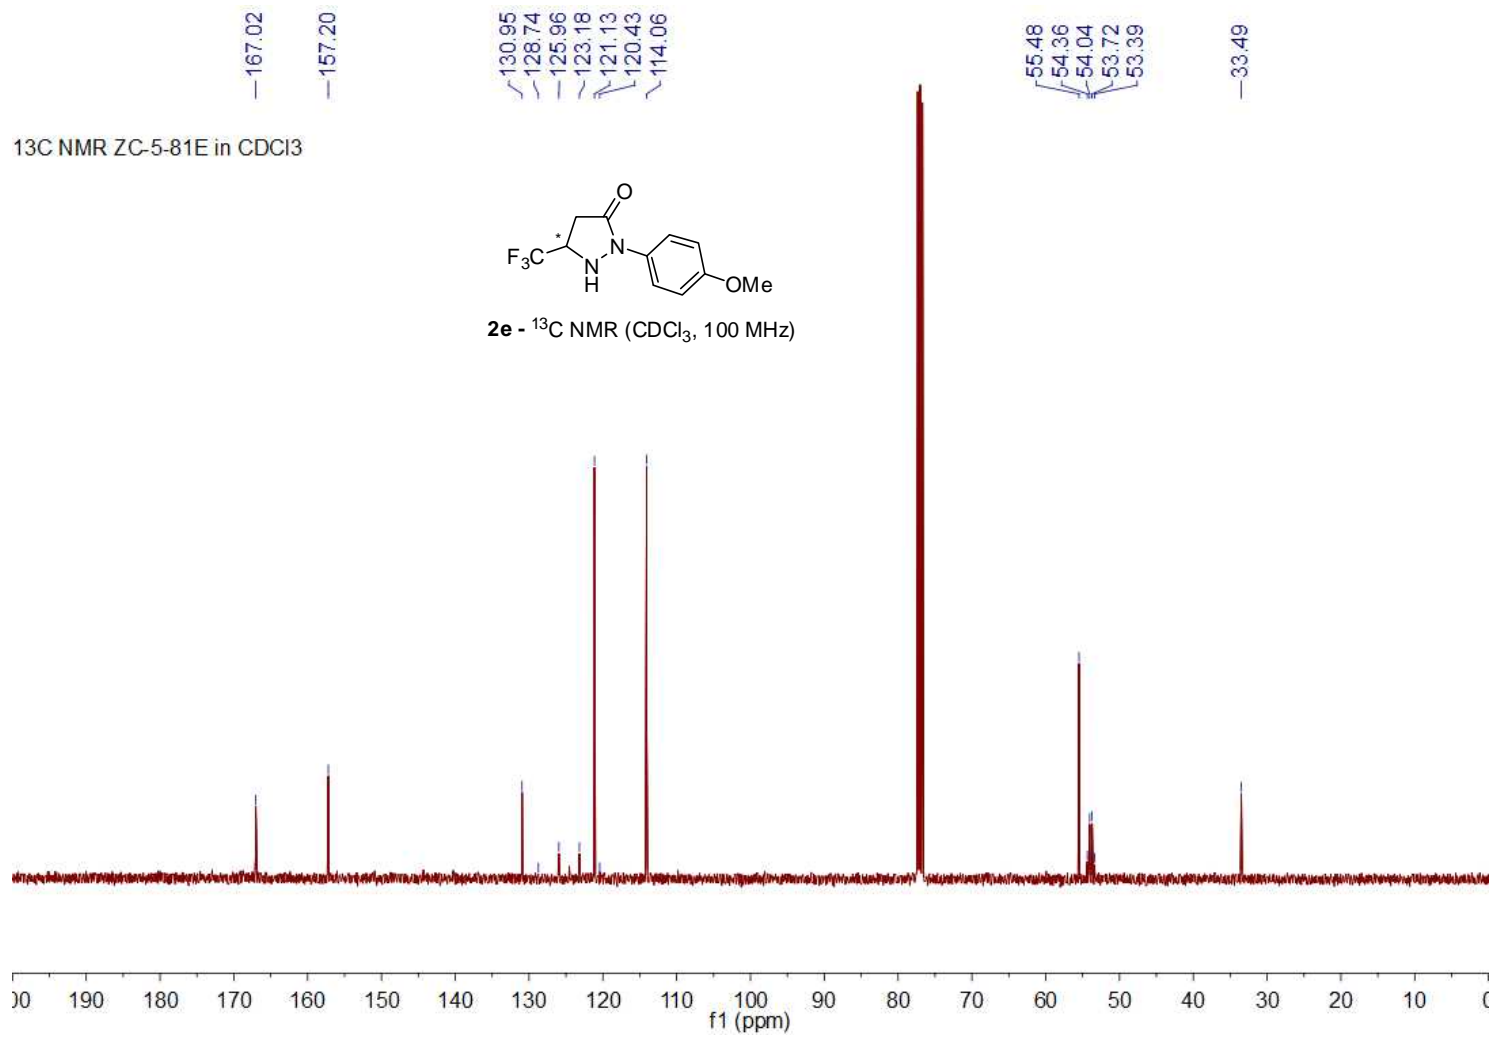

<sup>19</sup>F NMR ZC-5-81E in CDCl<sub>3</sub>

---78.43

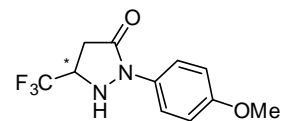

**2e** - <sup>19</sup>F NMR (CDCl<sub>3</sub>, 377 MHz)

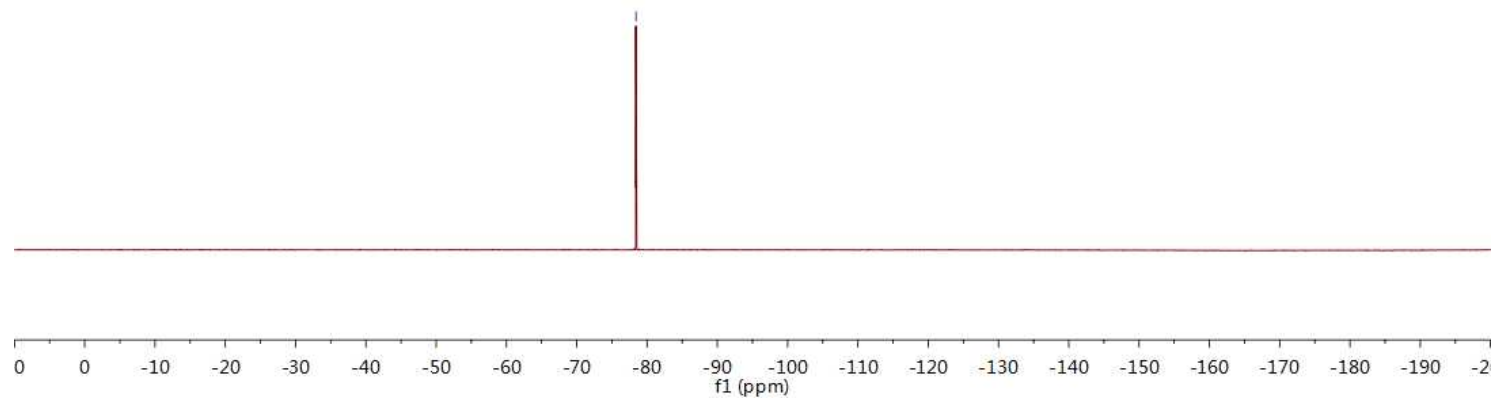

<sup>1</sup>H NMR ZC-5-81D in CDCl<sub>3</sub>

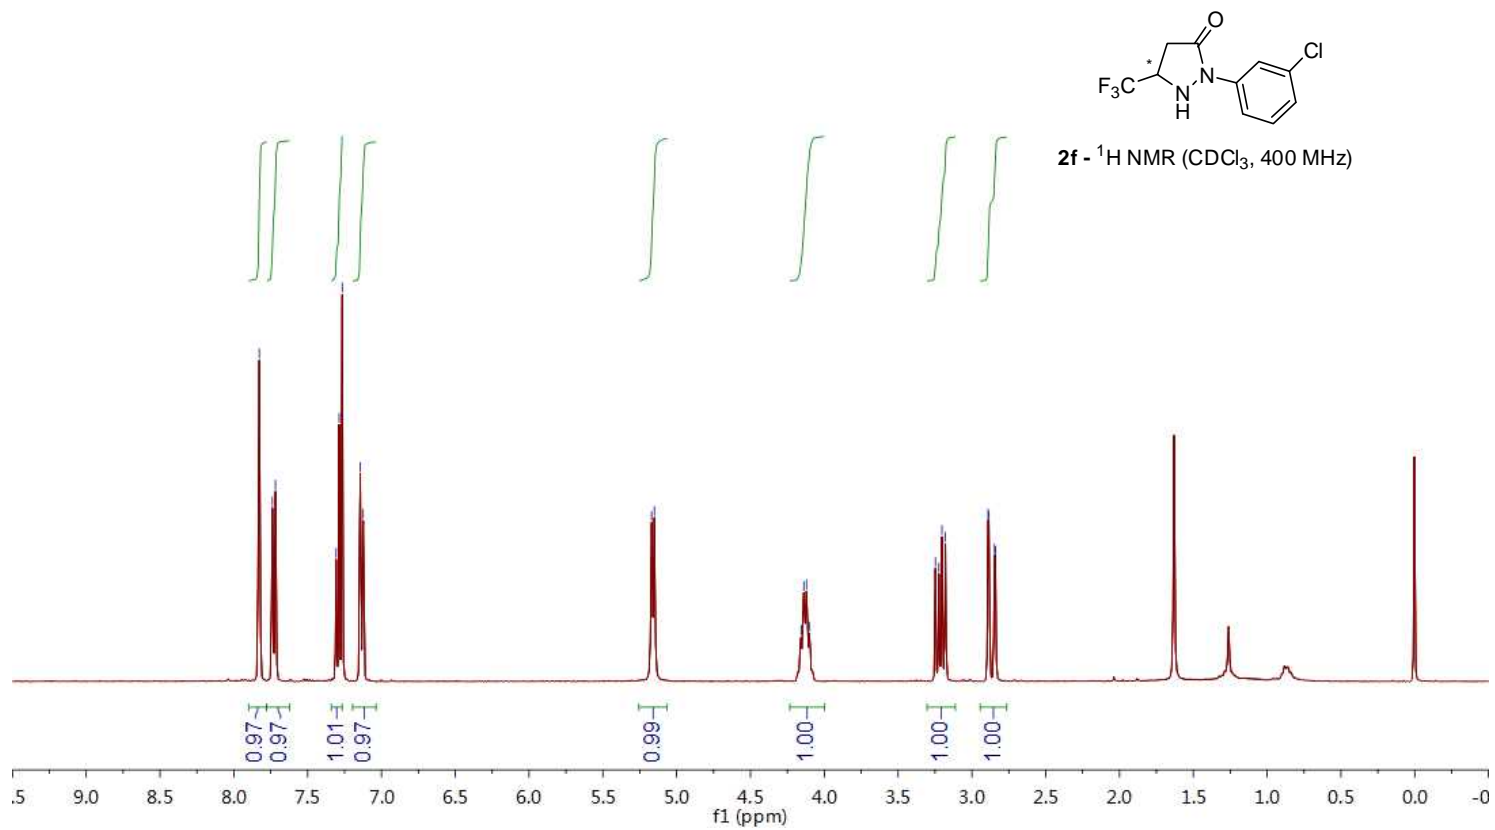

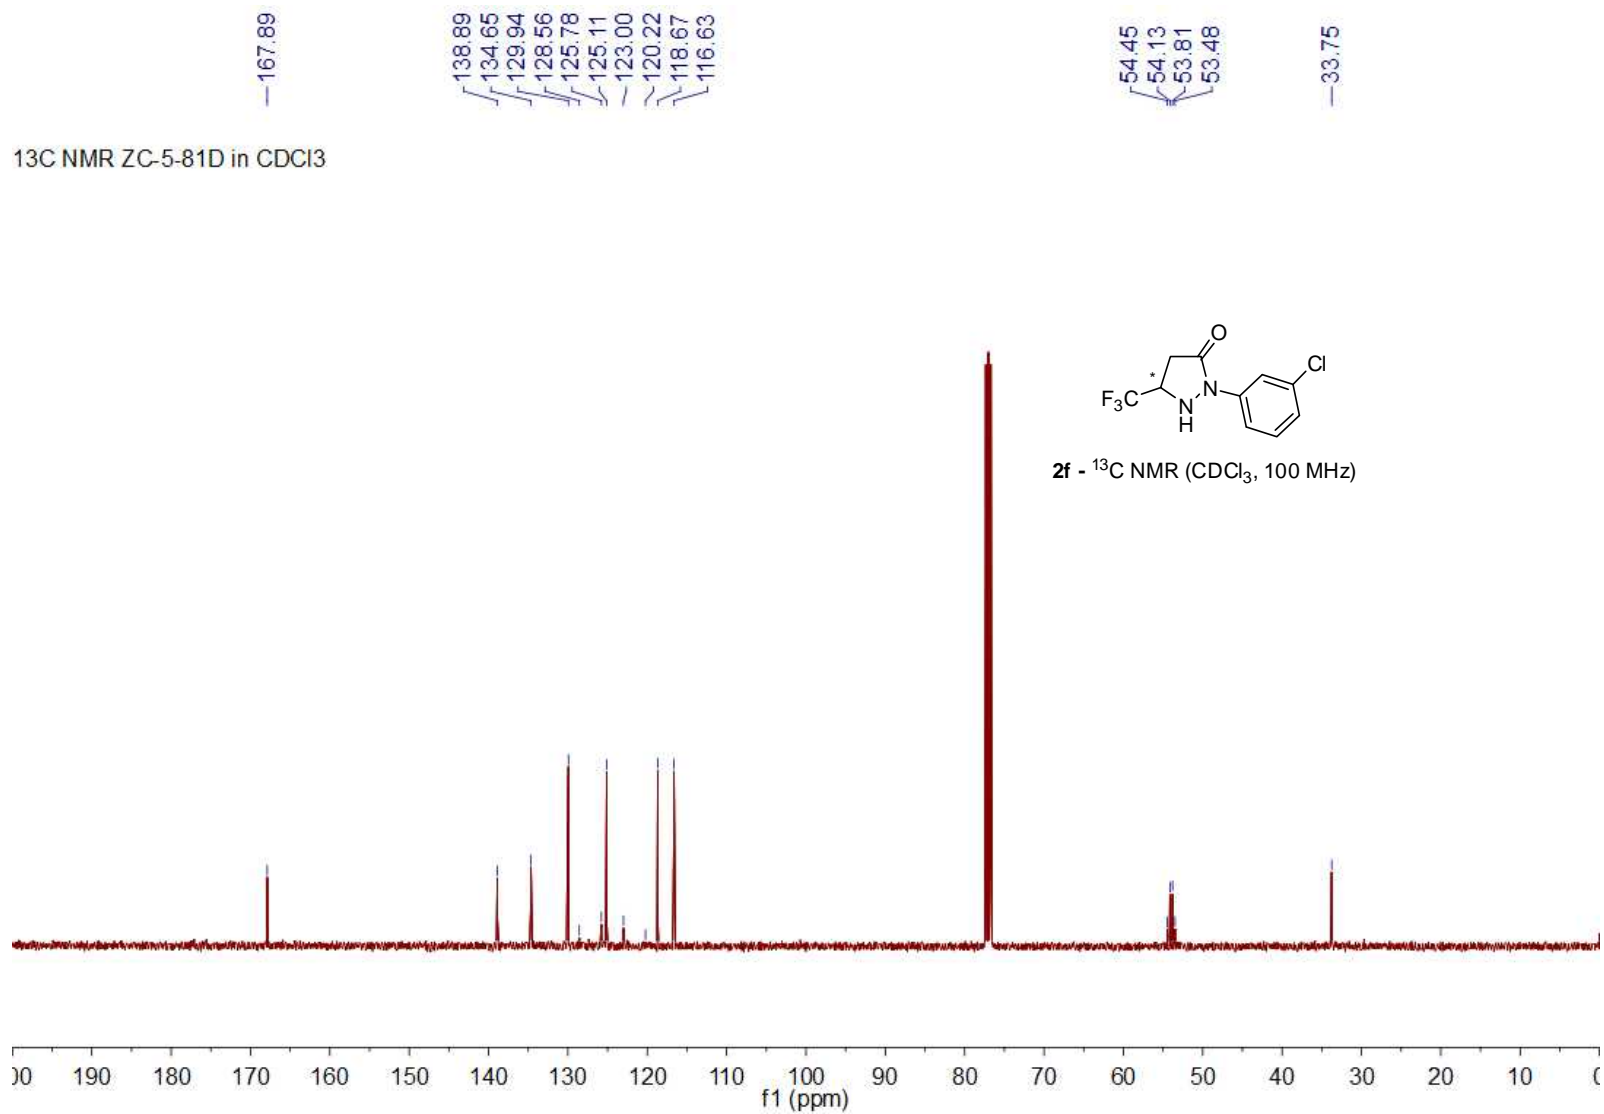

<sup>19</sup>F NMR ZC-5-81D in CDCl<sub>3</sub>

---78.40

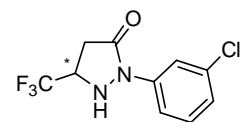

**2f** - <sup>19</sup>F NMR (CDCl<sub>3</sub>, 377 MHz)

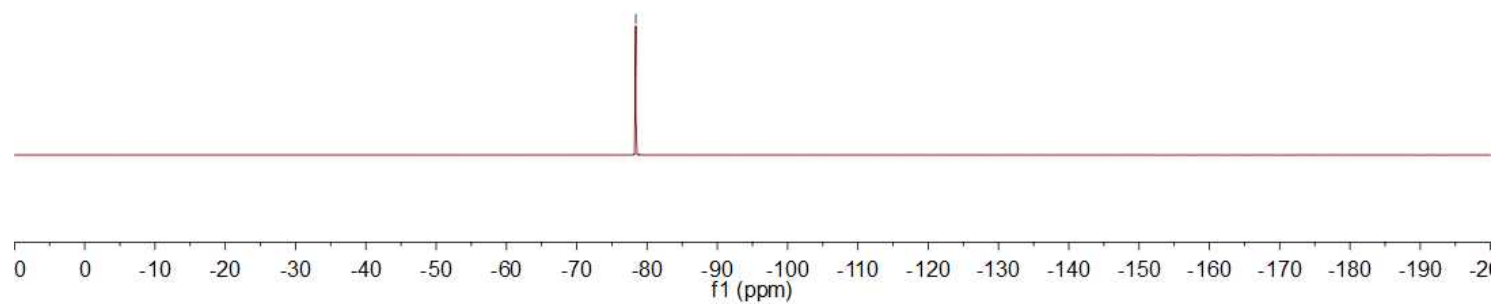

7.9317  
7.9255  
7.7059  
7.6996  
7.6837  
7.6774  
7.4054  
7.3832  
7.2645

5.2096  
5.1912  
4.1685  
4.1620  
4.1501  
4.1440  
4.1261  
4.1200  
3.2419  
3.2179  
3.1976  
3.1737  
2.8765  
2.8695  
2.8323  
2.8252

<sup>1</sup>H NMR ZC-5-83D in CDCl<sub>3</sub>

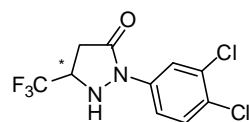

**2g** - <sup>1</sup>H NMR (CDCl<sub>3</sub>, 400 MHz)

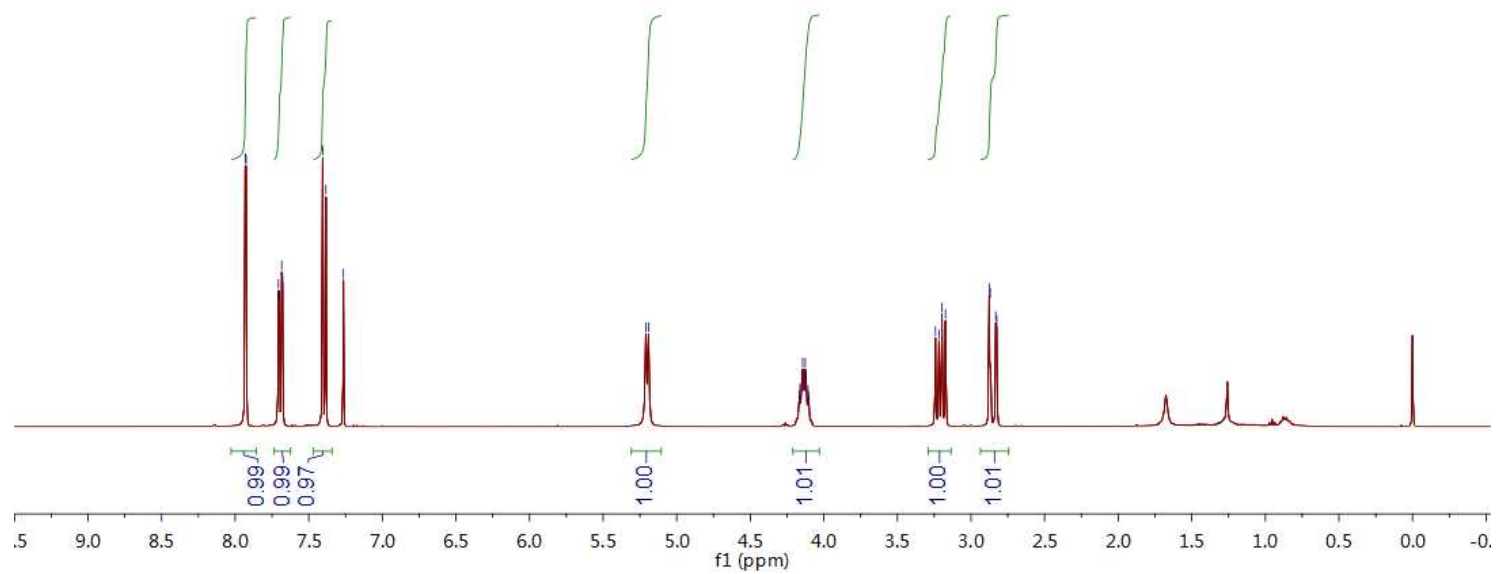



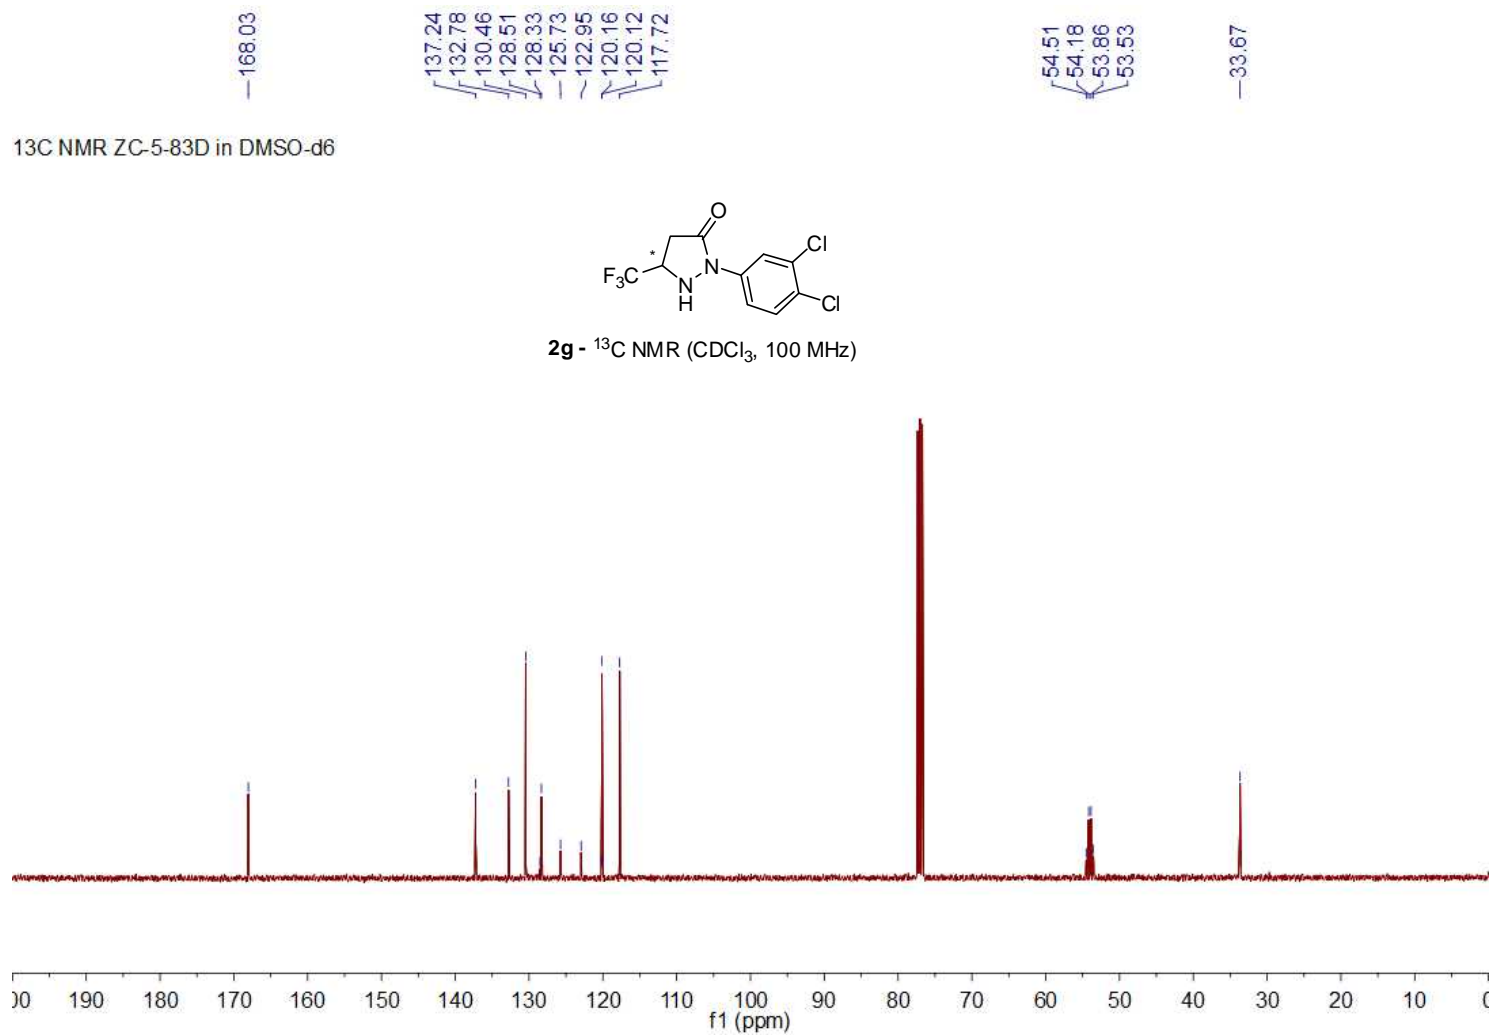

<sup>19</sup>F NMR ZC-5-83D in CDCl<sub>3</sub>

---78.43

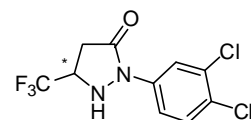

**2g** - <sup>19</sup>F NMR (CDCl<sub>3</sub>, 377 MHz)

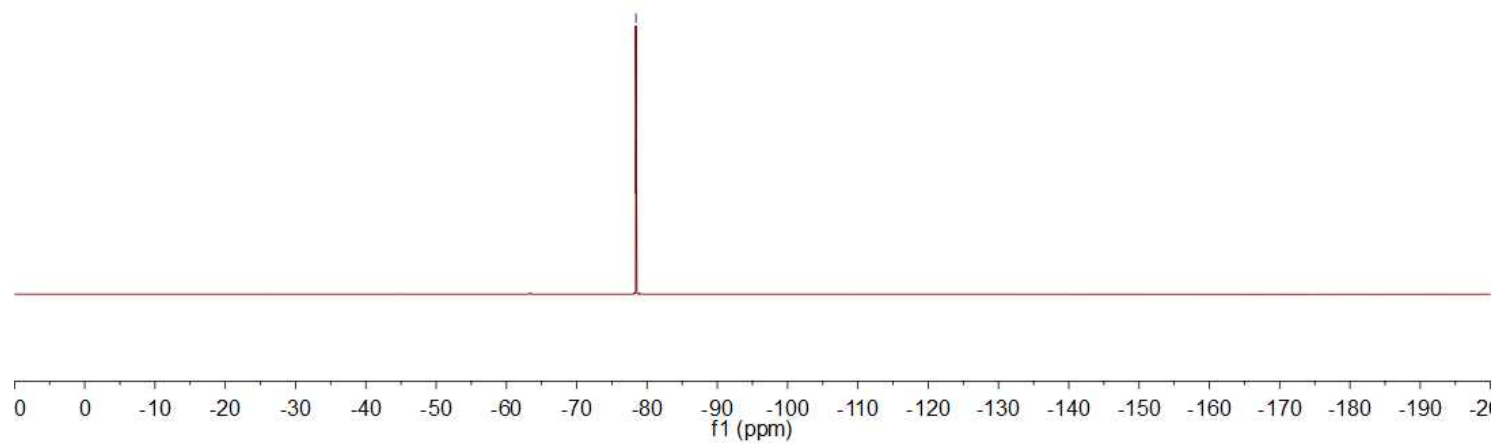

7.7658  
7.7538  
7.7483  
7.7433  
7.7314  
7.0760  
7.0545  
7.0327

5.1713  
5.1528

4.1514  
4.1449  
4.1268  
4.1088  
4.0908  
4.0841  
3.2422  
3.2180  
3.1982  
3.1741  
2.8787  
2.8717  
2.8347  
2.8277

<sup>1</sup>H NMR ZC-5-83C in CDCl<sub>3</sub>

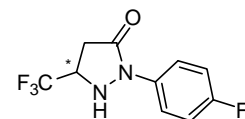

2h - <sup>1</sup>H NMR (CDCl<sub>3</sub>, 400 MHz)

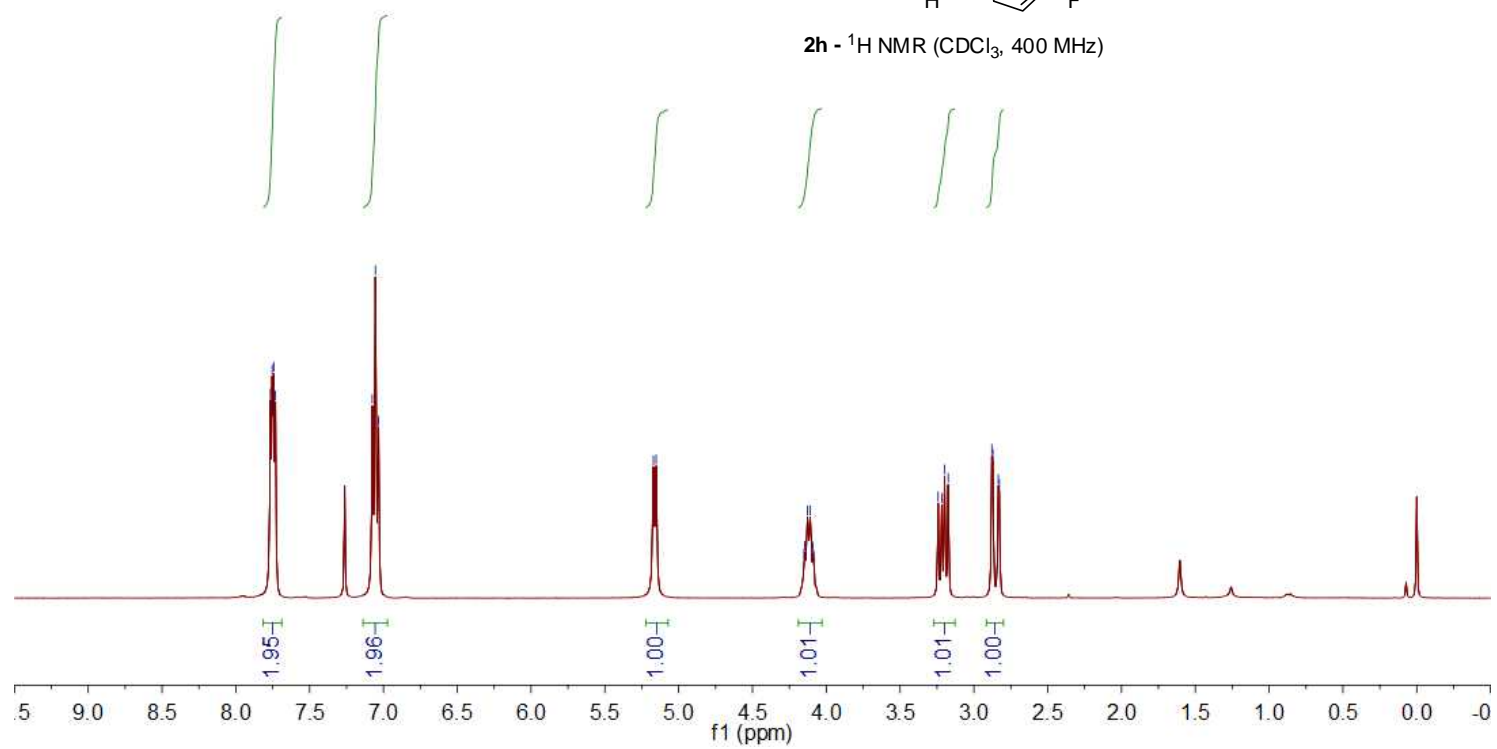

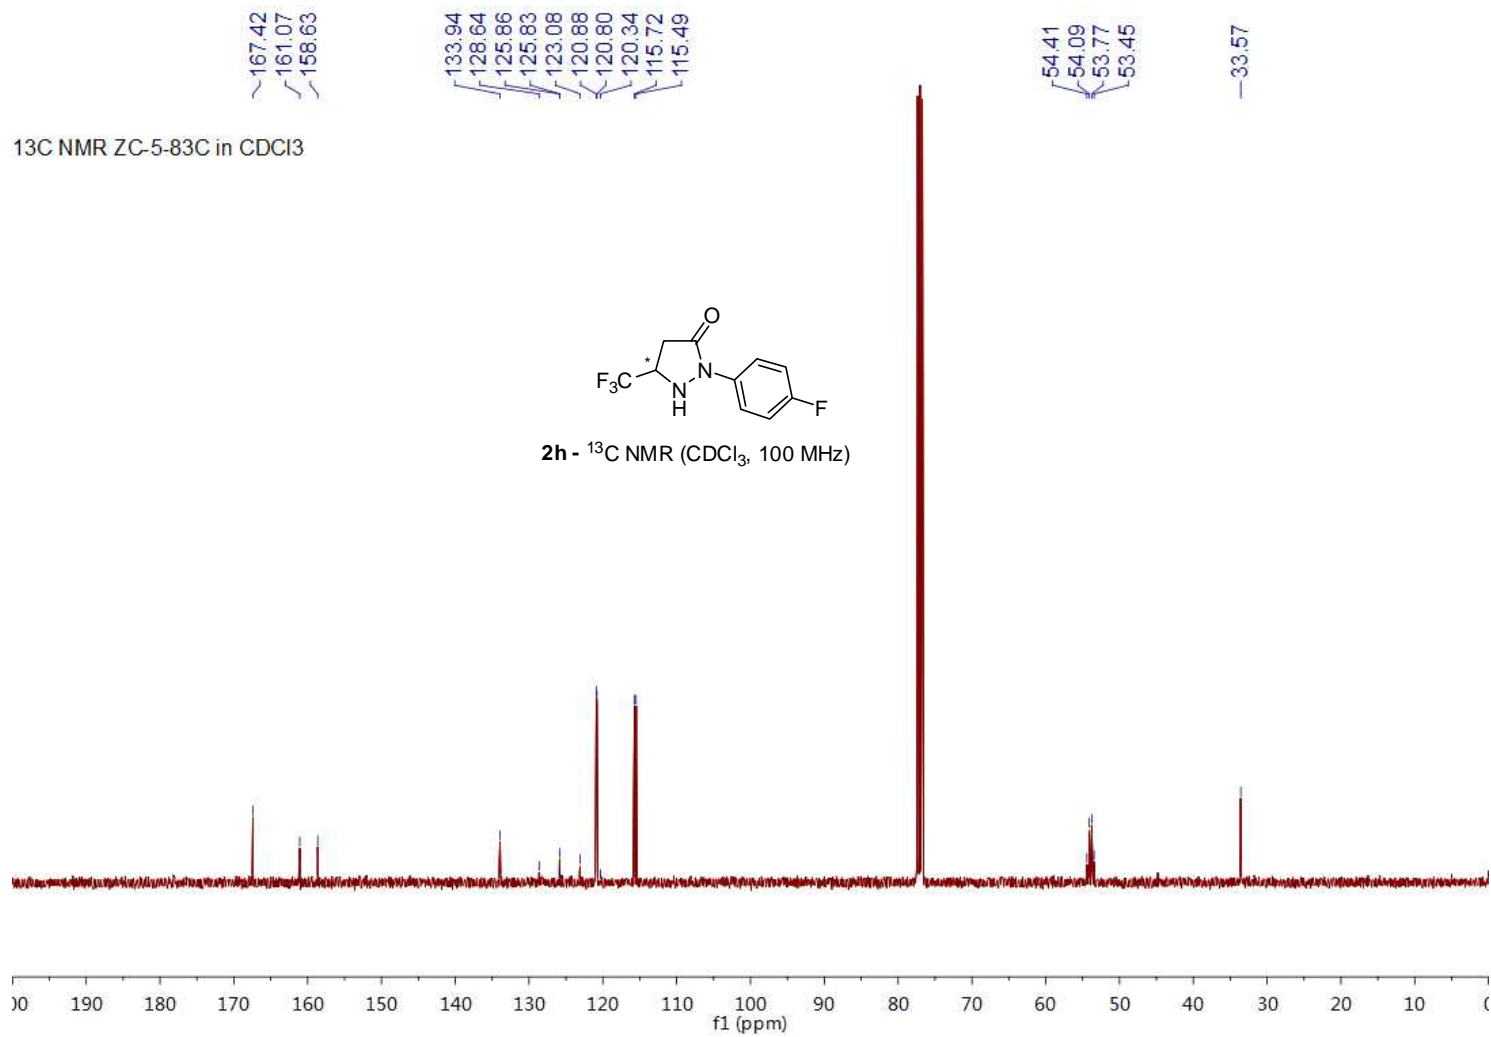

<sup>19</sup>F NMR ZC-5-83C in CDCl<sub>3</sub>

—78.47

—116.60

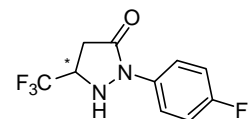

**2h** - <sup>19</sup>F NMR (CDCl<sub>3</sub>, 377 MHz)

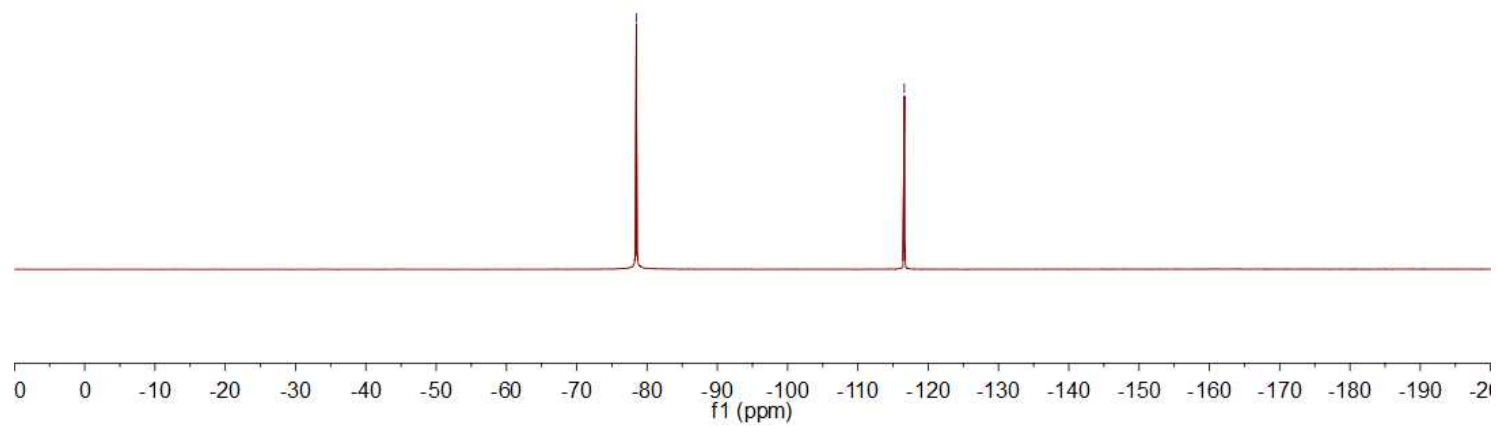

7.7822  
7.7627  
7.3805  
7.3616  
7.3404  
7.1761  
7.1576  
7.1391

5.0850  
5.0653  
4.2612  
4.2522  
4.2362  
4.2103  
4.1949  
4.1860  
3.1753  
3.1723  
3.1520  
3.1287  
2.9912  
2.9813  
2.9476  
2.9377

<sup>1</sup>H NMR ZC-5-93A in CDCl<sub>3</sub>

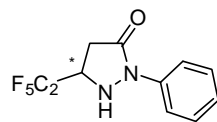

**2i** - <sup>1</sup>H NMR (CDCl<sub>3</sub>, 400 MHz)

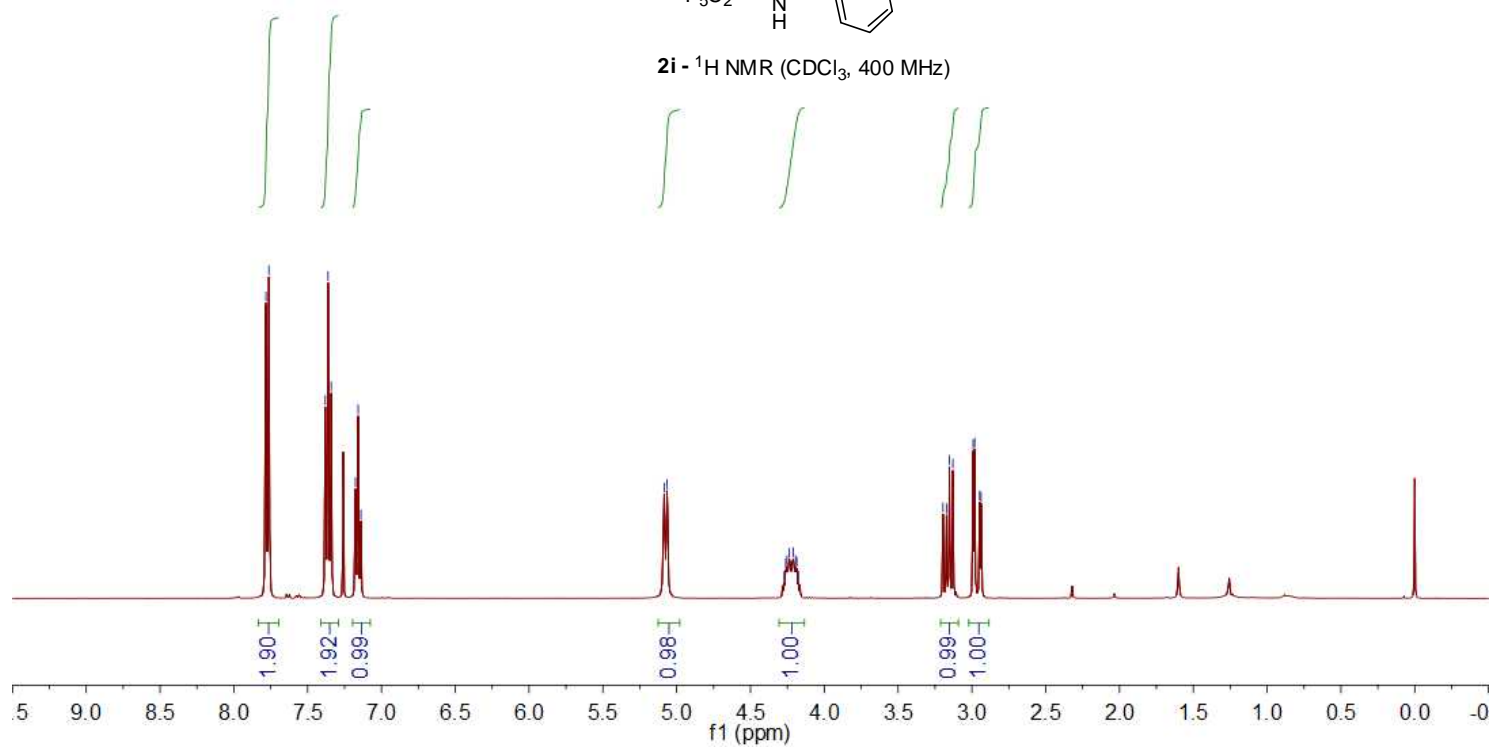

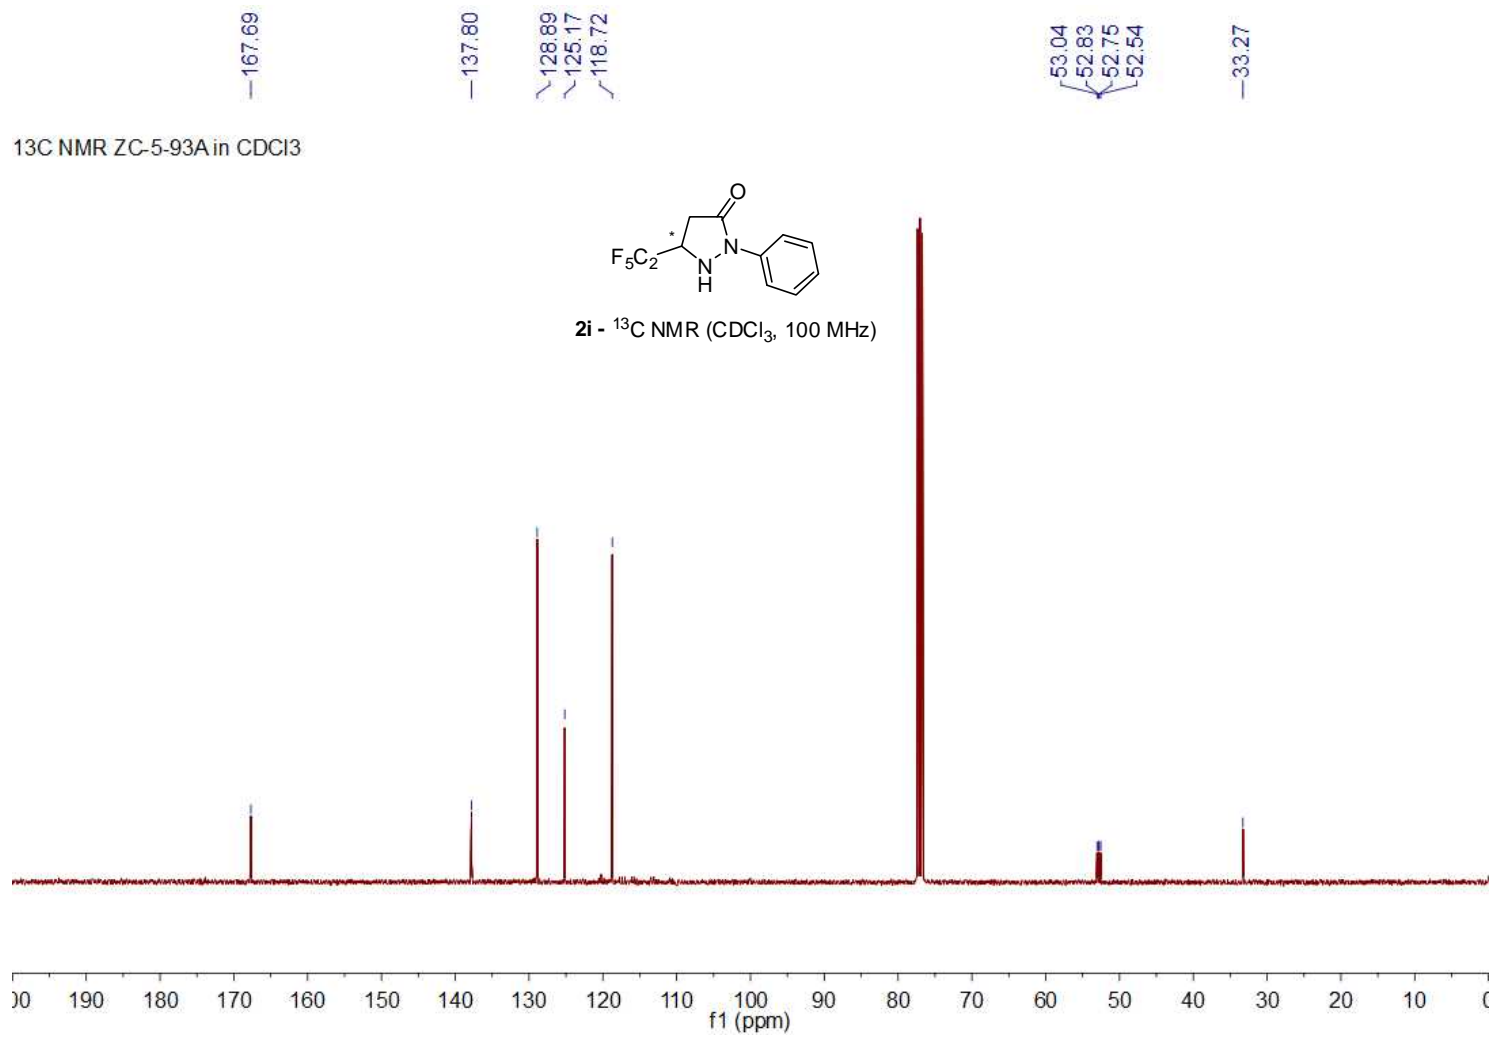

<sup>19</sup>F NMR ZC-5-93A in CDCl<sub>3</sub>

-81.70

121.23

121.97

130.71

131.45

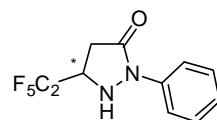

2i - <sup>19</sup>F NMR (CDCl<sub>3</sub>, 377 MHz)

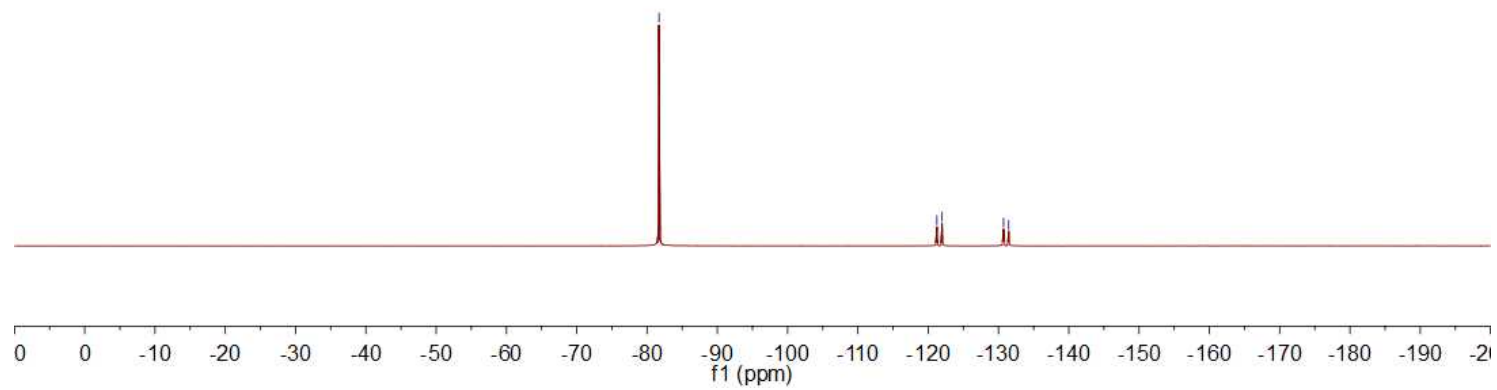



<sup>1</sup>H NMR ZC-5-93B in CDCl<sub>3</sub>

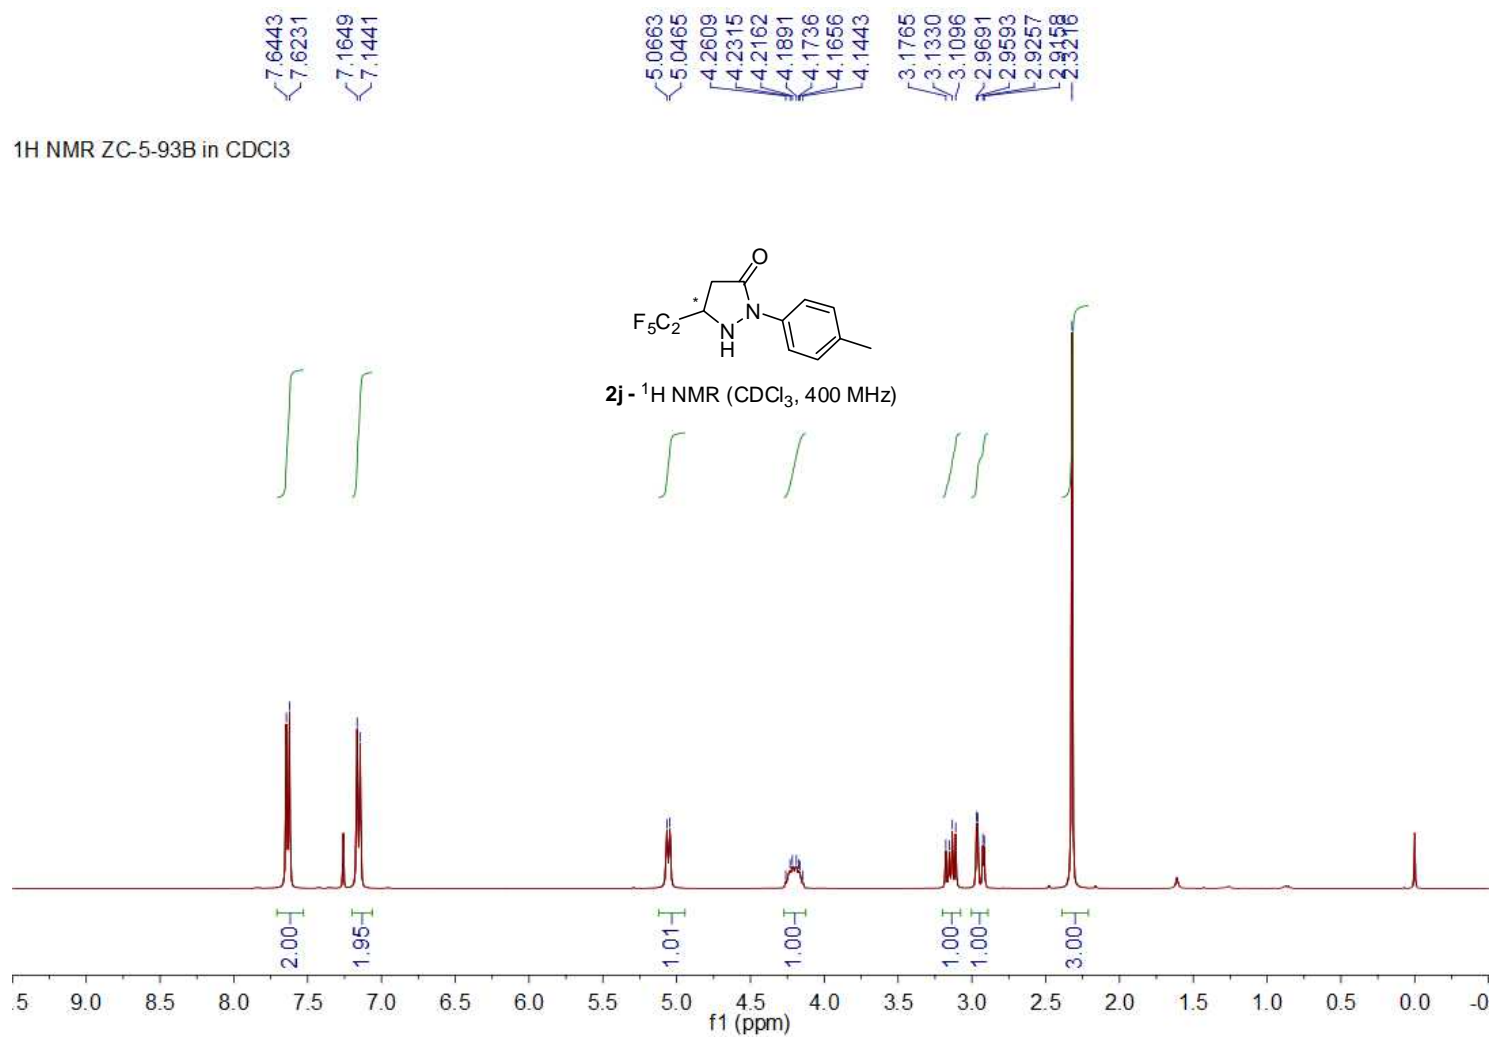

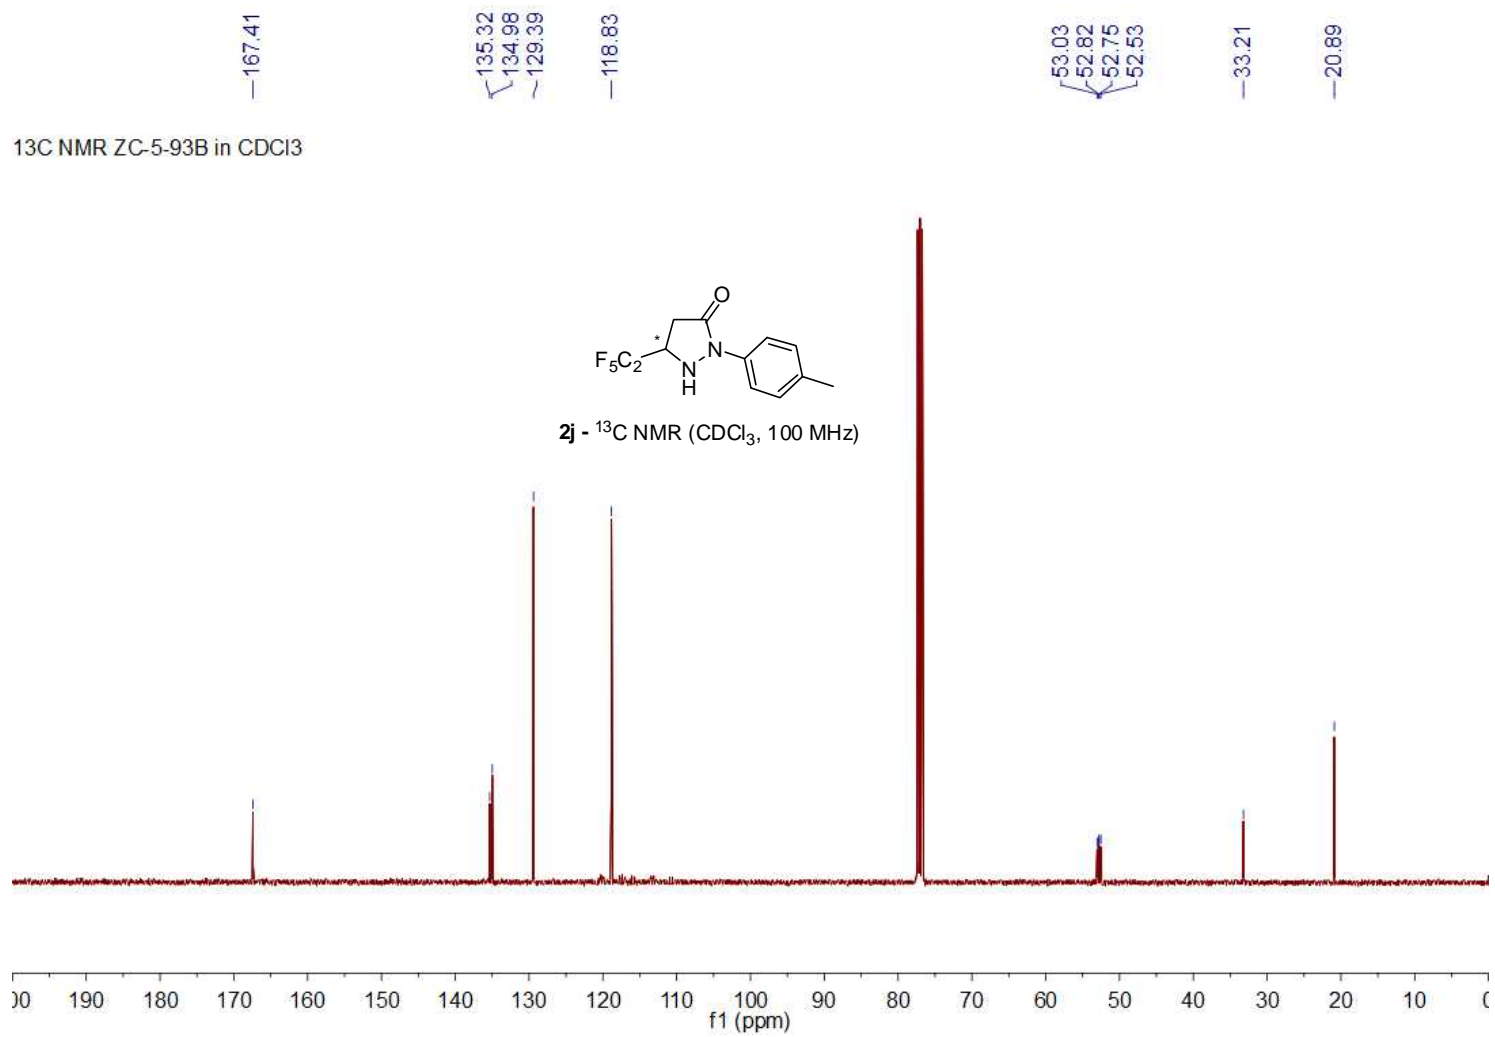

<sup>19</sup>F NMR ZC-5-93B in CDCl<sub>3</sub>

-81.71

121.28

122.02

130.67

131.41

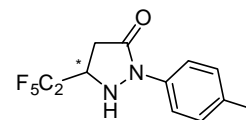

**2 j** - <sup>19</sup>F NMR (CDCl<sub>3</sub>, 377 MHz)

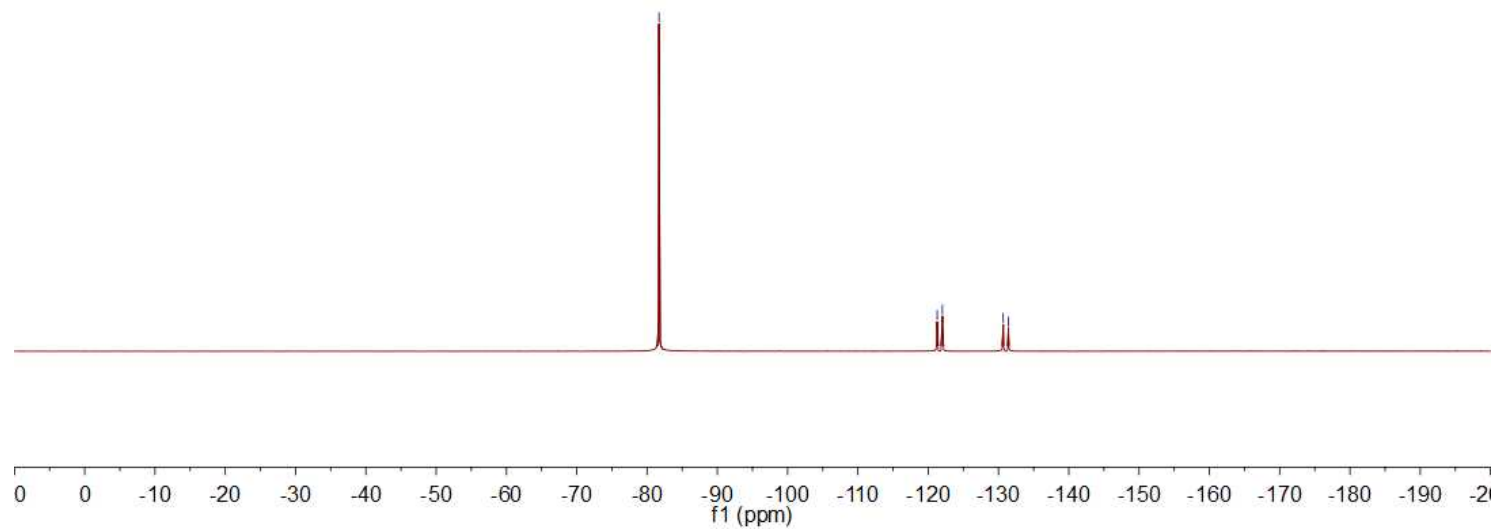

7.8020  
7.7824  
7.3820  
7.3630  
7.3420  
7.2563  
7.1732  
7.1547  
7.1361

5.0329  
5.0108

3.7676  
3.7505  
3.7332  
3.7138  
3.6962  
3.6790  
2.9971  
2.9790  
2.9616  
2.9454  
2.9274

1.4648  
1.4464

<sup>1</sup>H NMR ZC-5-86F in CDCl<sub>3</sub>

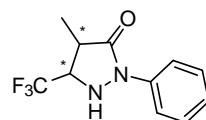

4a - <sup>1</sup>H NMR (CDCl<sub>3</sub>, 400 MHz)

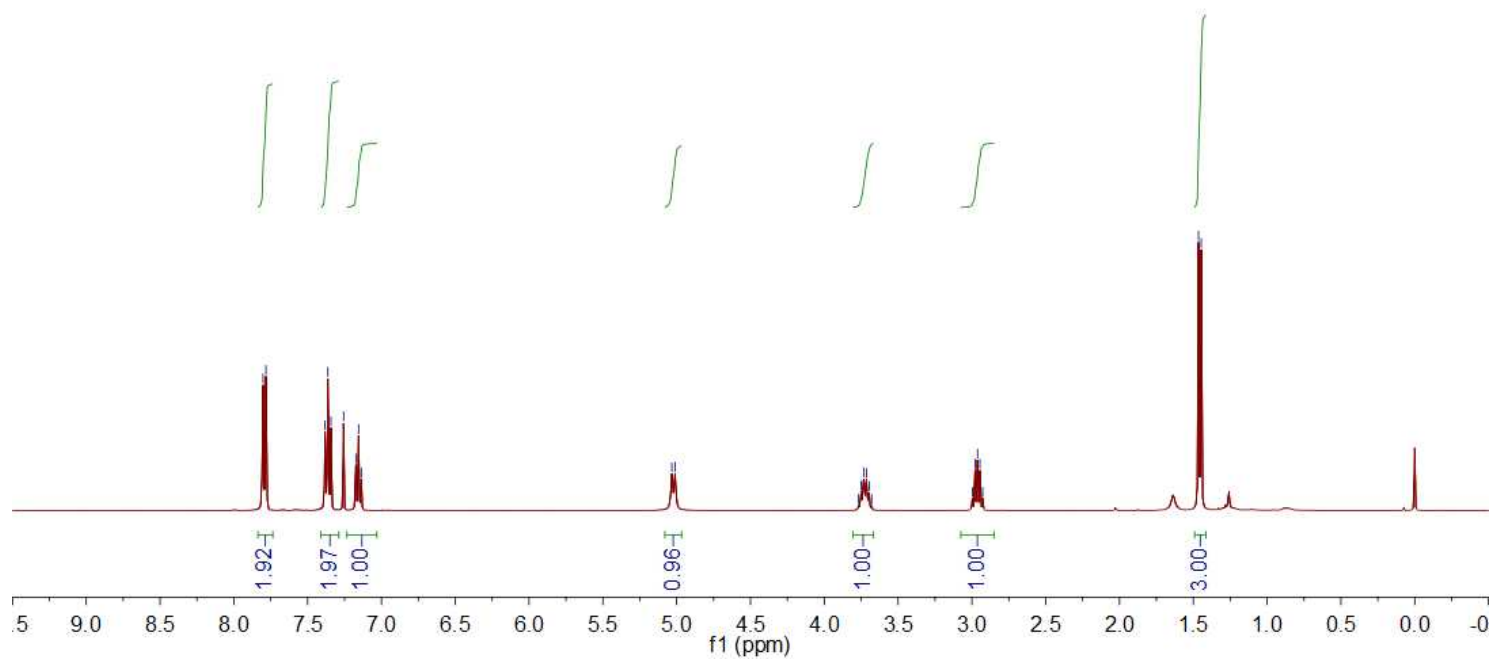

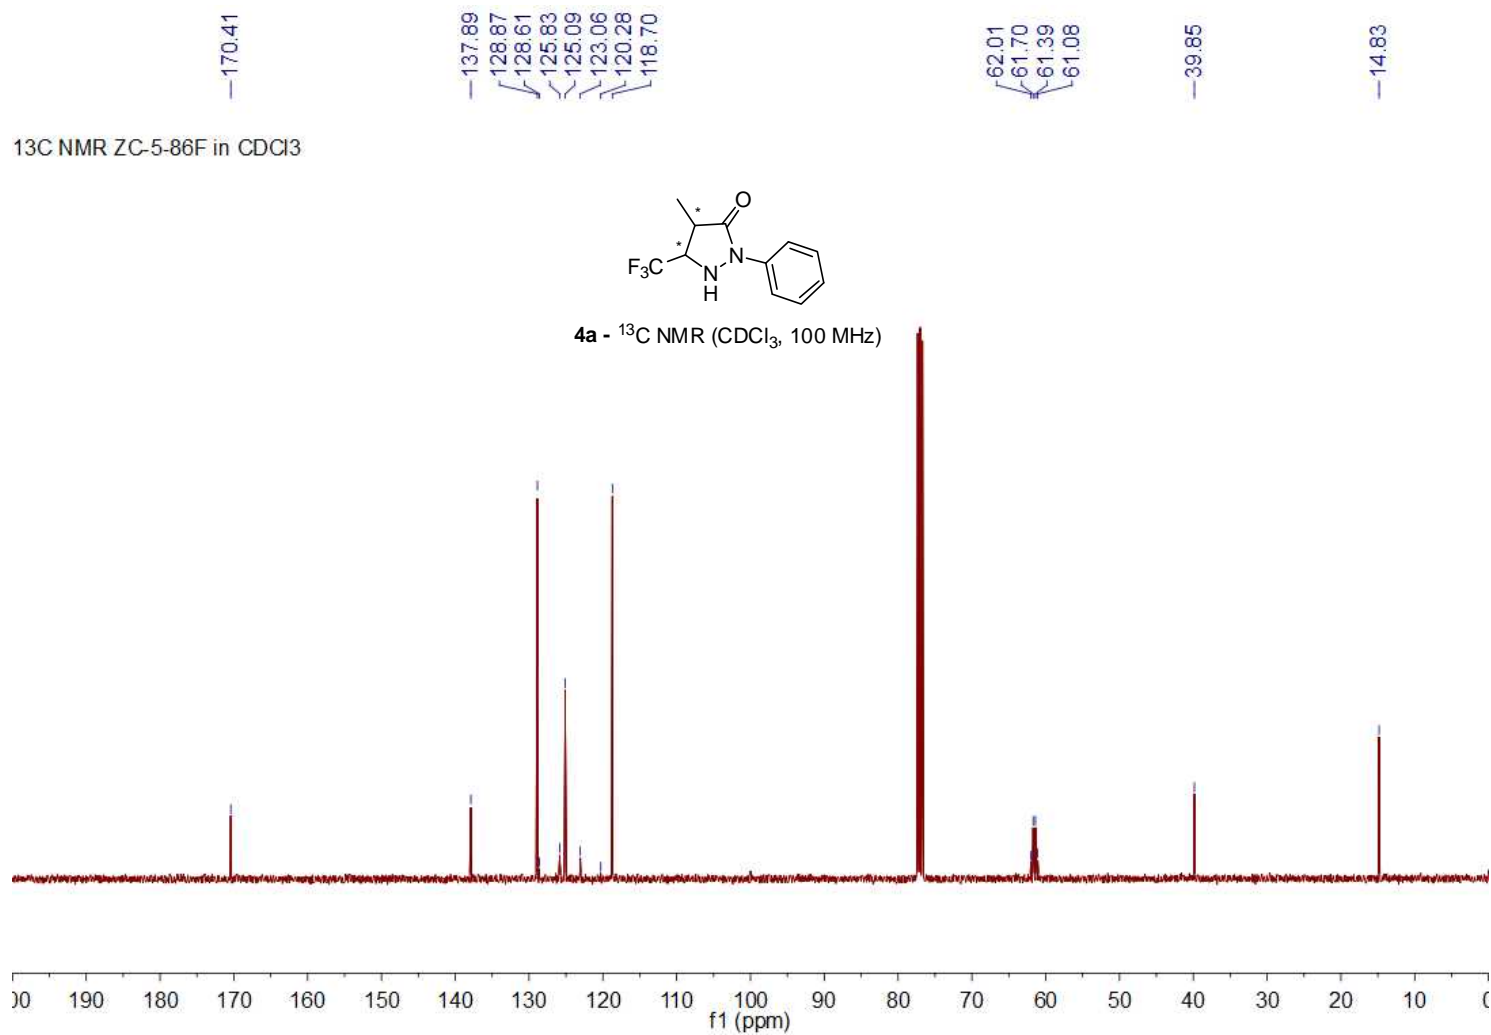

19F ZC-5-86F in CDCl3

—76.52

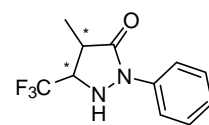

4a - <sup>19</sup>F NMR (CDCl<sub>3</sub>, 377 MHz)

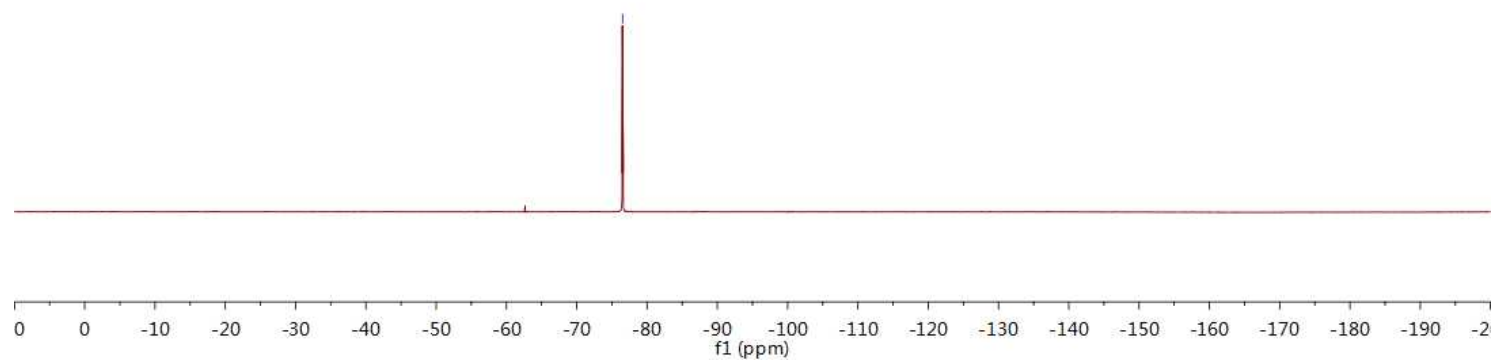

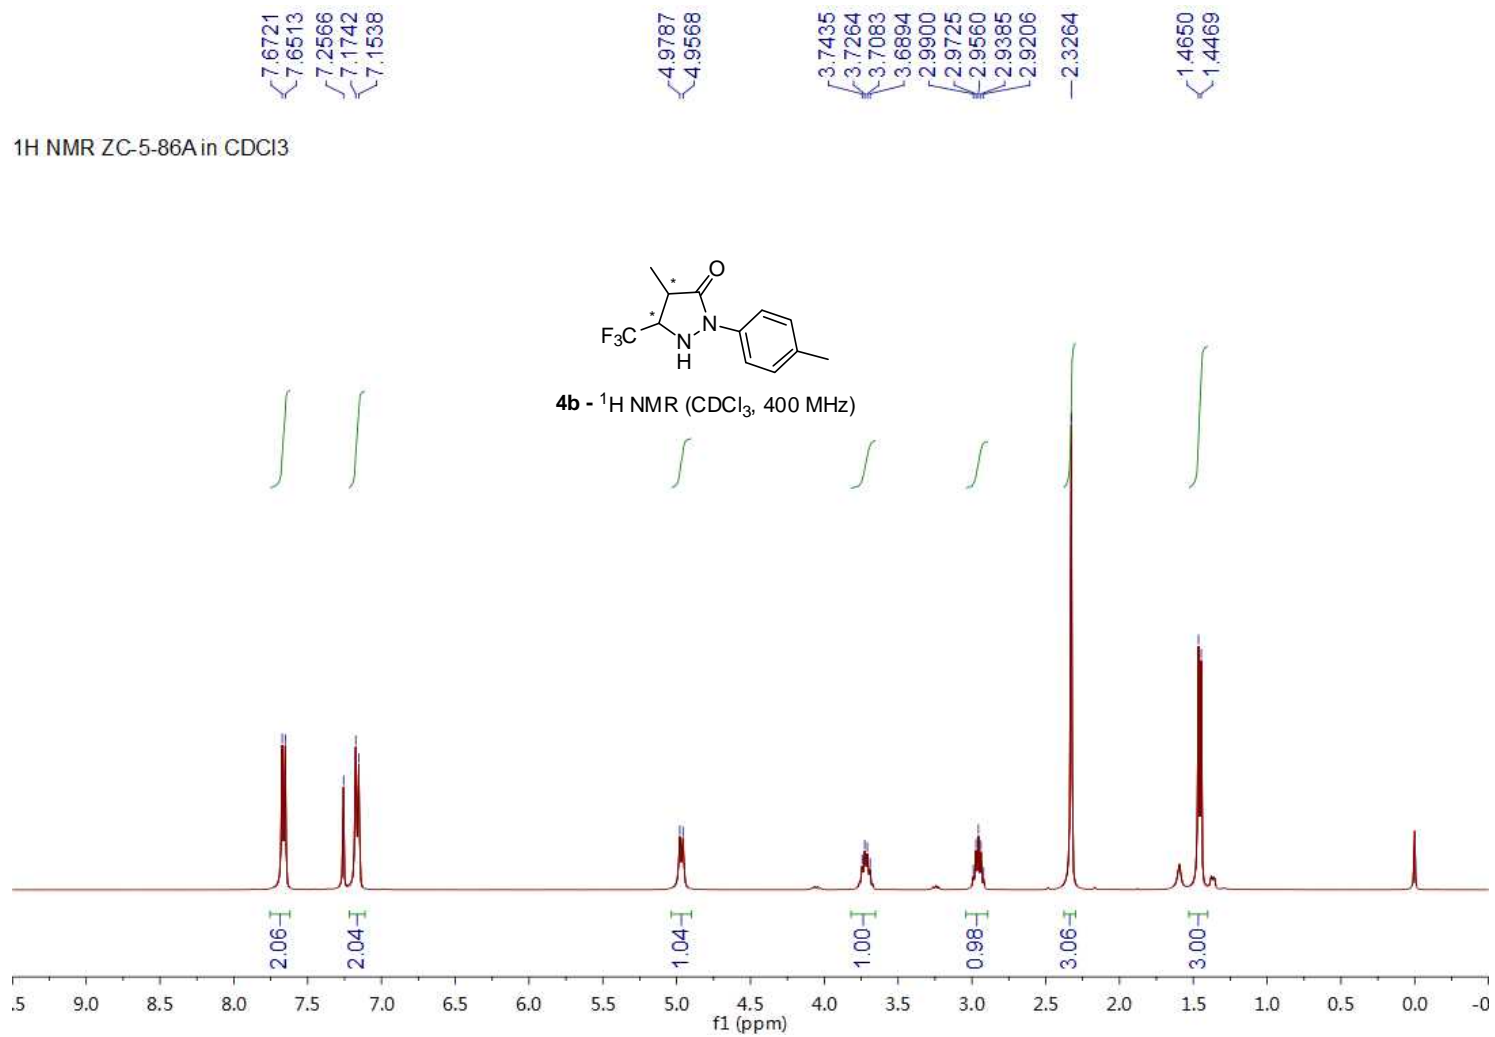

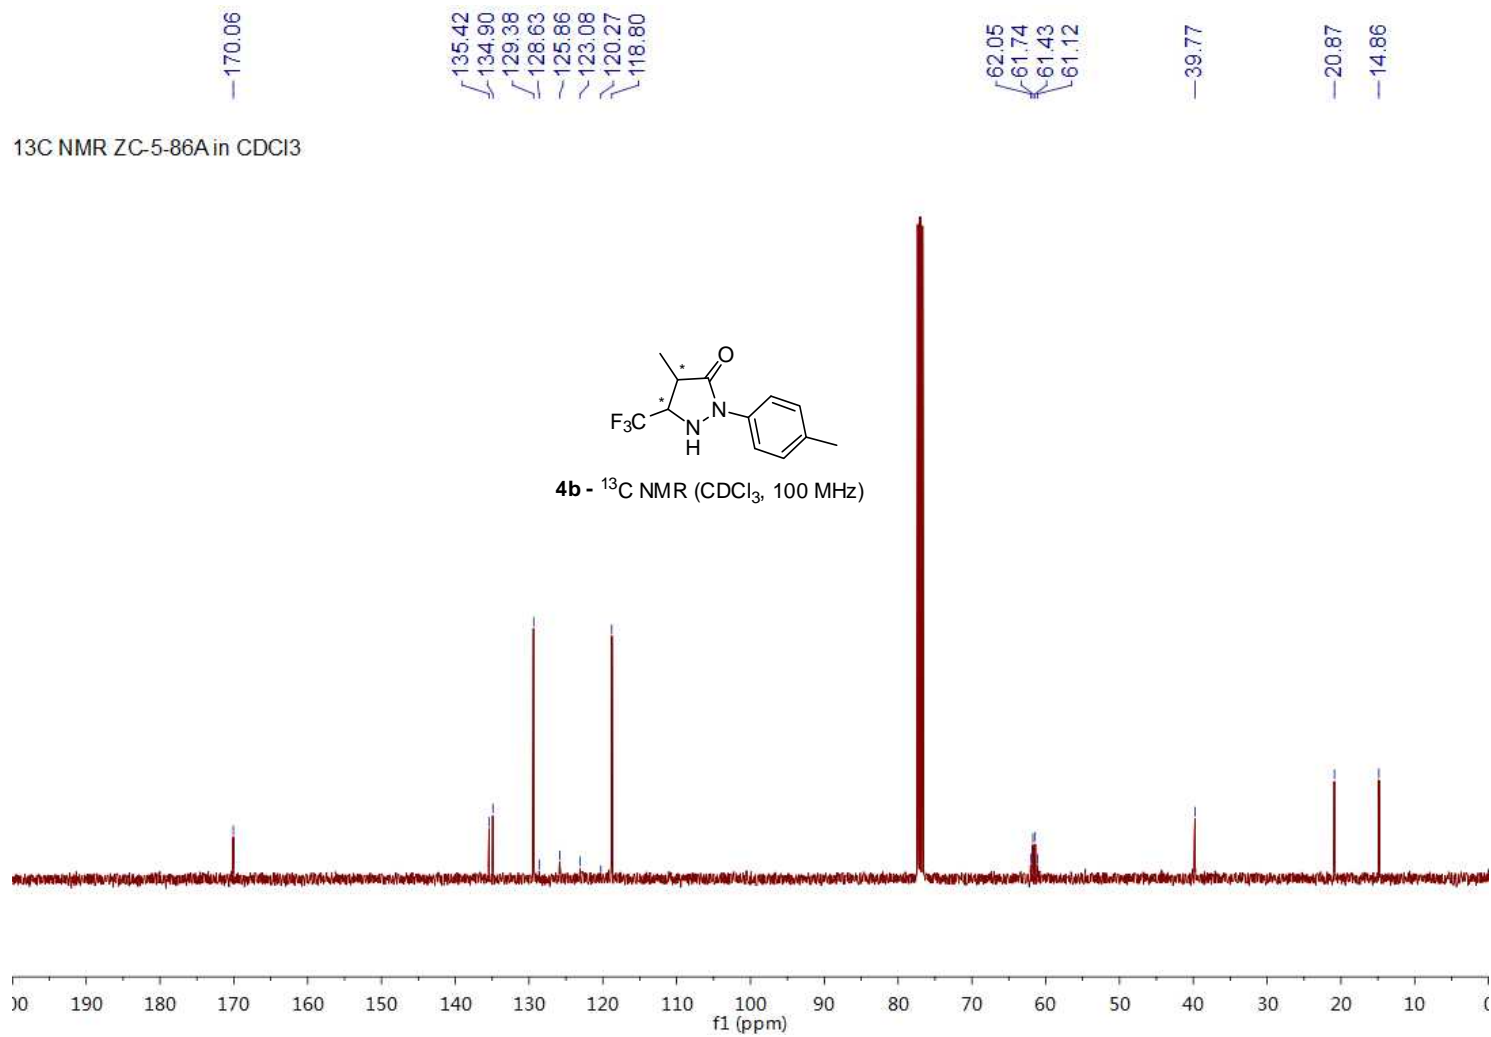



<sup>19</sup>F NMR ZC-5-86A in CDCl<sub>3</sub>

---76.46

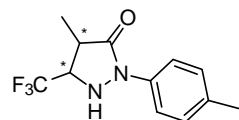

**4b** - <sup>19</sup>F NMR (CDCl<sub>3</sub>, 377 MHz)

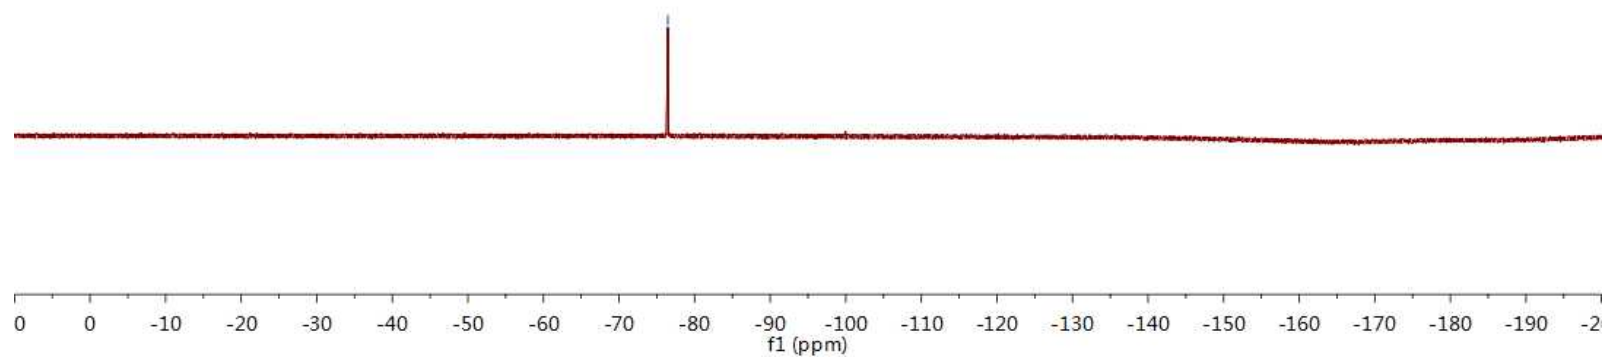

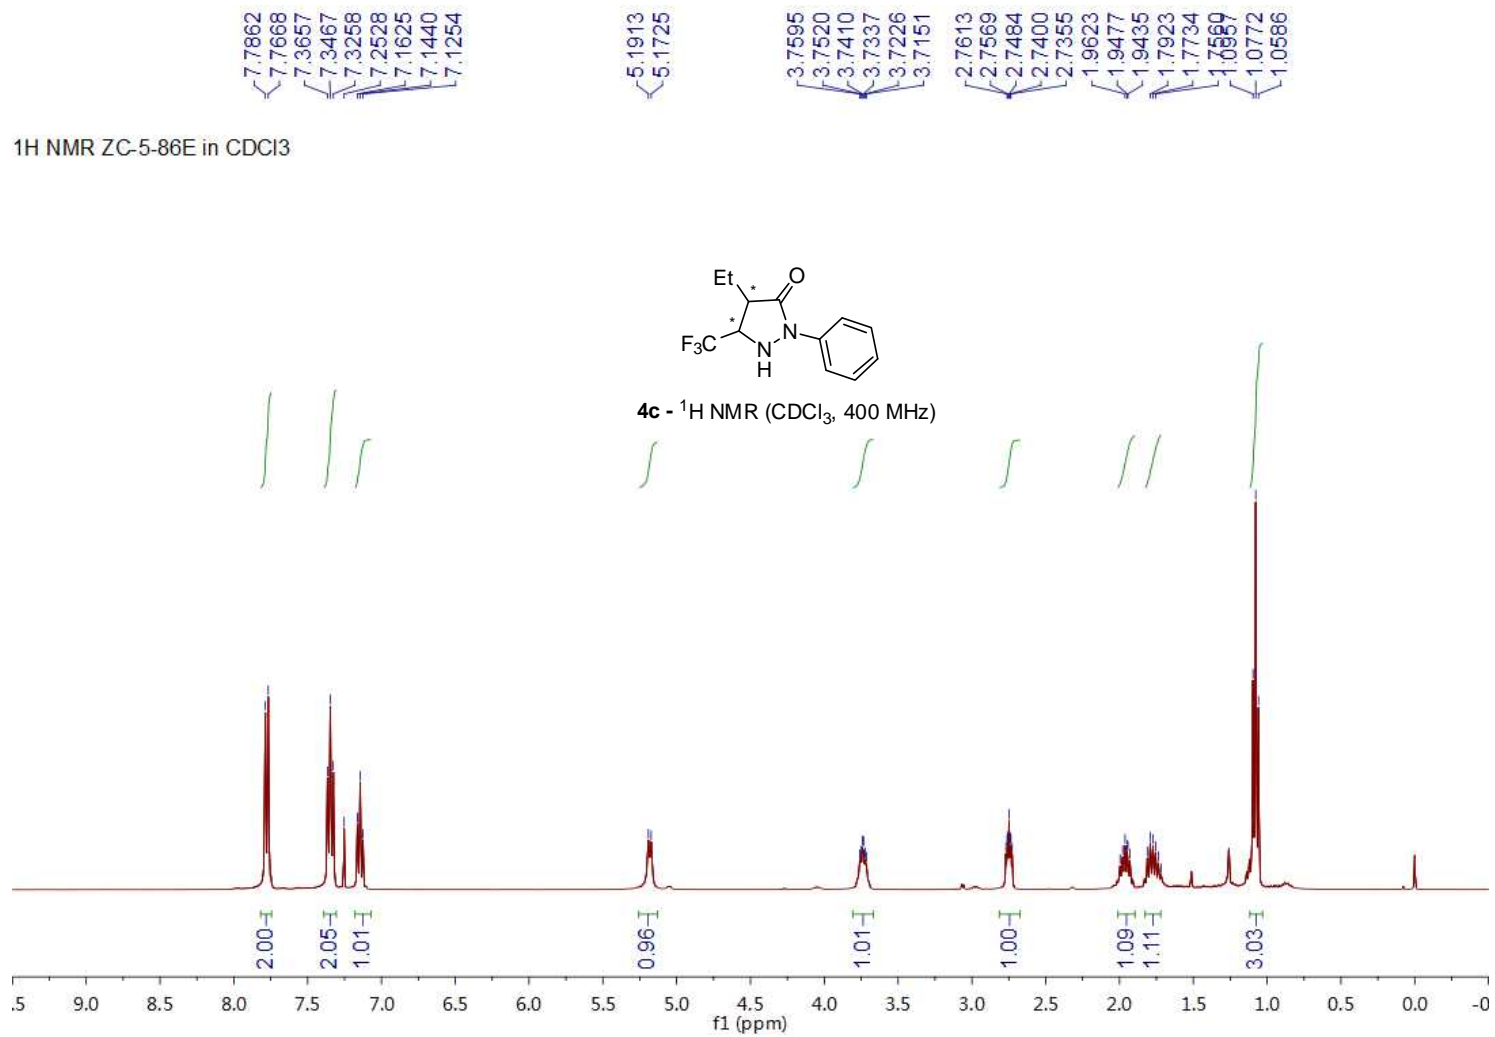

<sup>13</sup>C NMR ZC-5-86E in CDCl<sub>3</sub>

—170.00

—137.87  
—128.83  
—128.78  
—126.01  
—125.12  
—123.23  
—120.45  
—118.96

—58.93  
—58.62  
—58.31  
—57.99  
—46.30

—23.05

—11.11

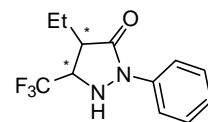

4c - <sup>13</sup>C NMR (CDCl<sub>3</sub>, 100 MHz)

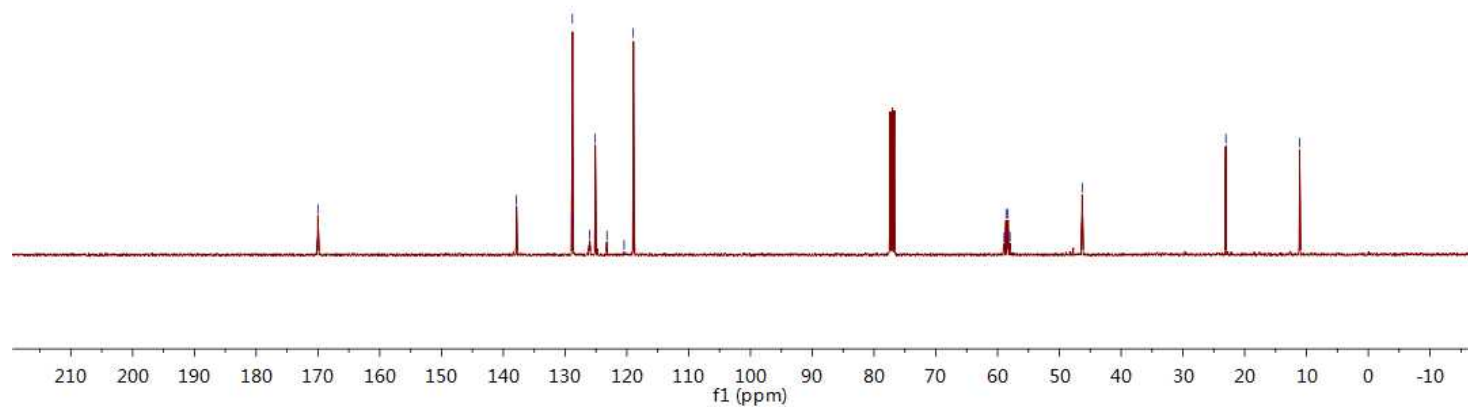

<sup>19</sup>F NMR ZC-5-86E in CDCl<sub>3</sub>

—77.69

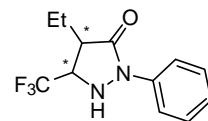

**4c** - <sup>19</sup>F NMR (CDCl<sub>3</sub>, 377 MHz)

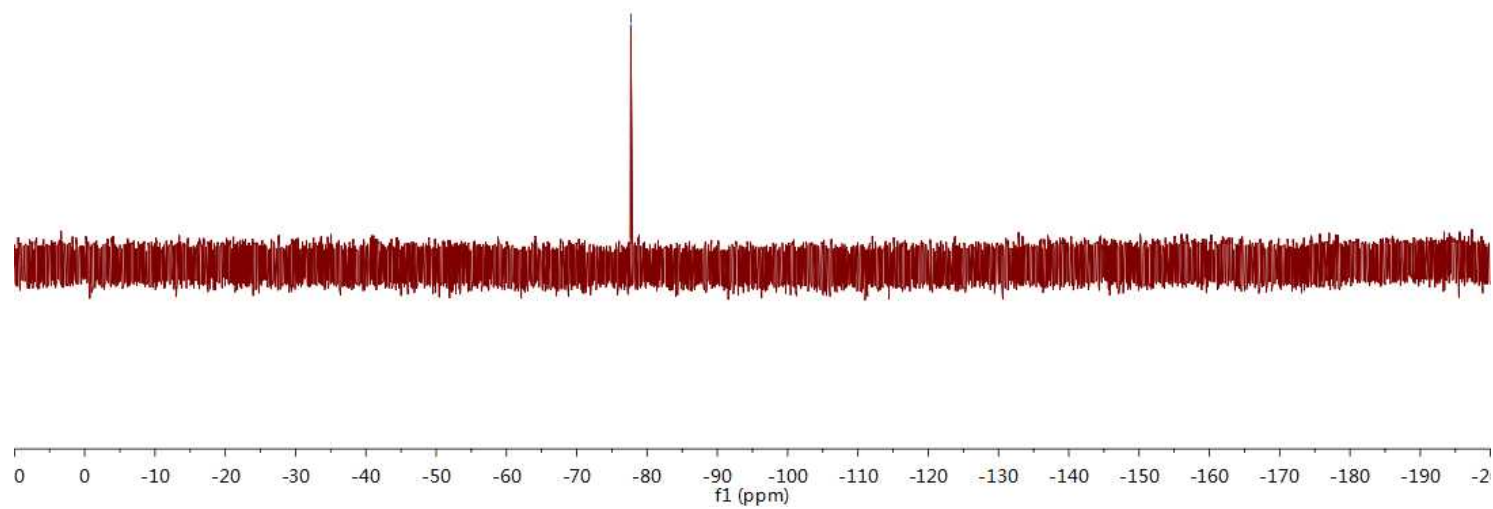

7.6663  
7.6459  
7.1677  
7.1476

5.0646  
5.0455

3.7570  
3.7460  
3.7392  
3.7279

2.7808  
2.7723  
2.7636

2.3226  
2.0059  
1.9892  
1.9726  
1.8154  
1.7977  
1.0993  
1.0810

<sup>1</sup>H NMR ZC-5-90A in CDCl<sub>3</sub>

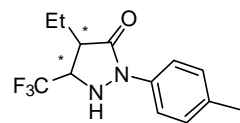

**4d** - <sup>1</sup>H NMR (CDCl<sub>3</sub>, 400 MHz)

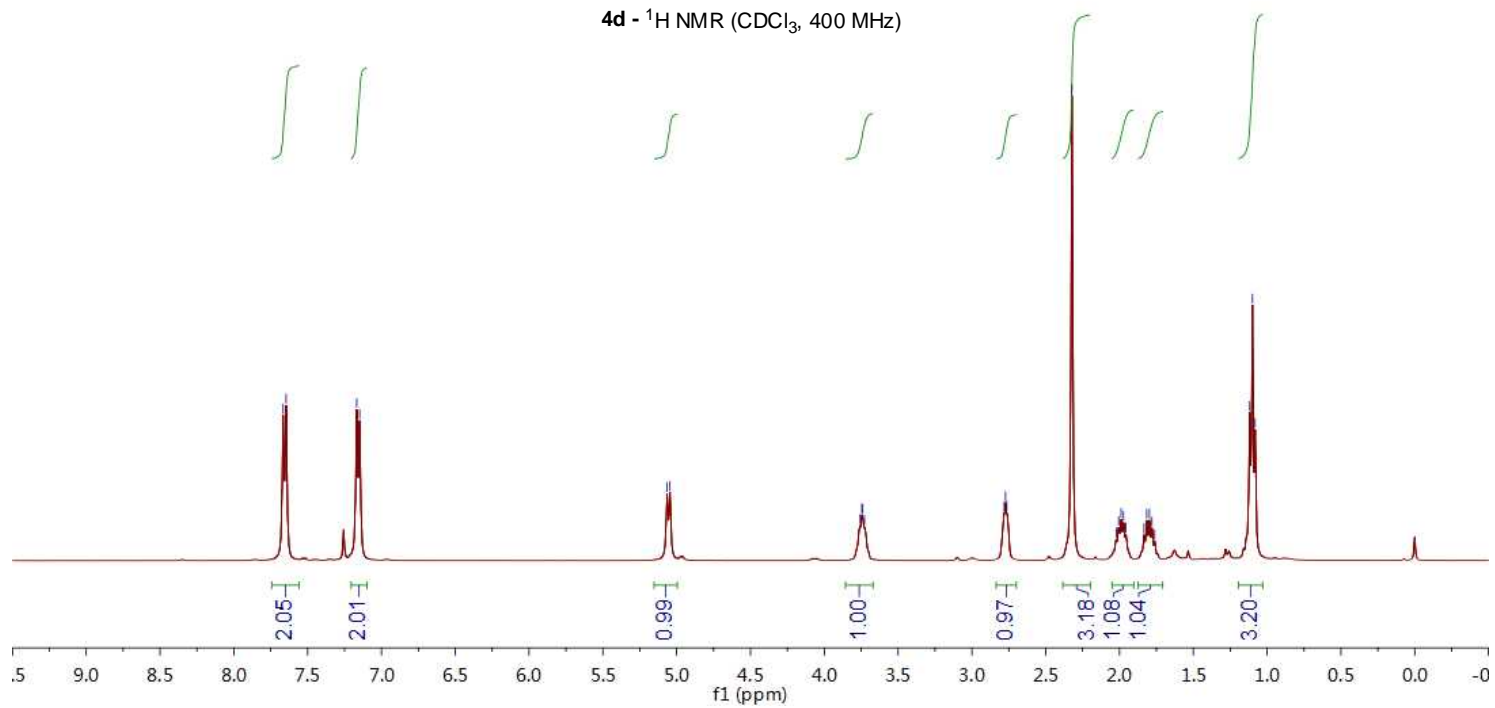

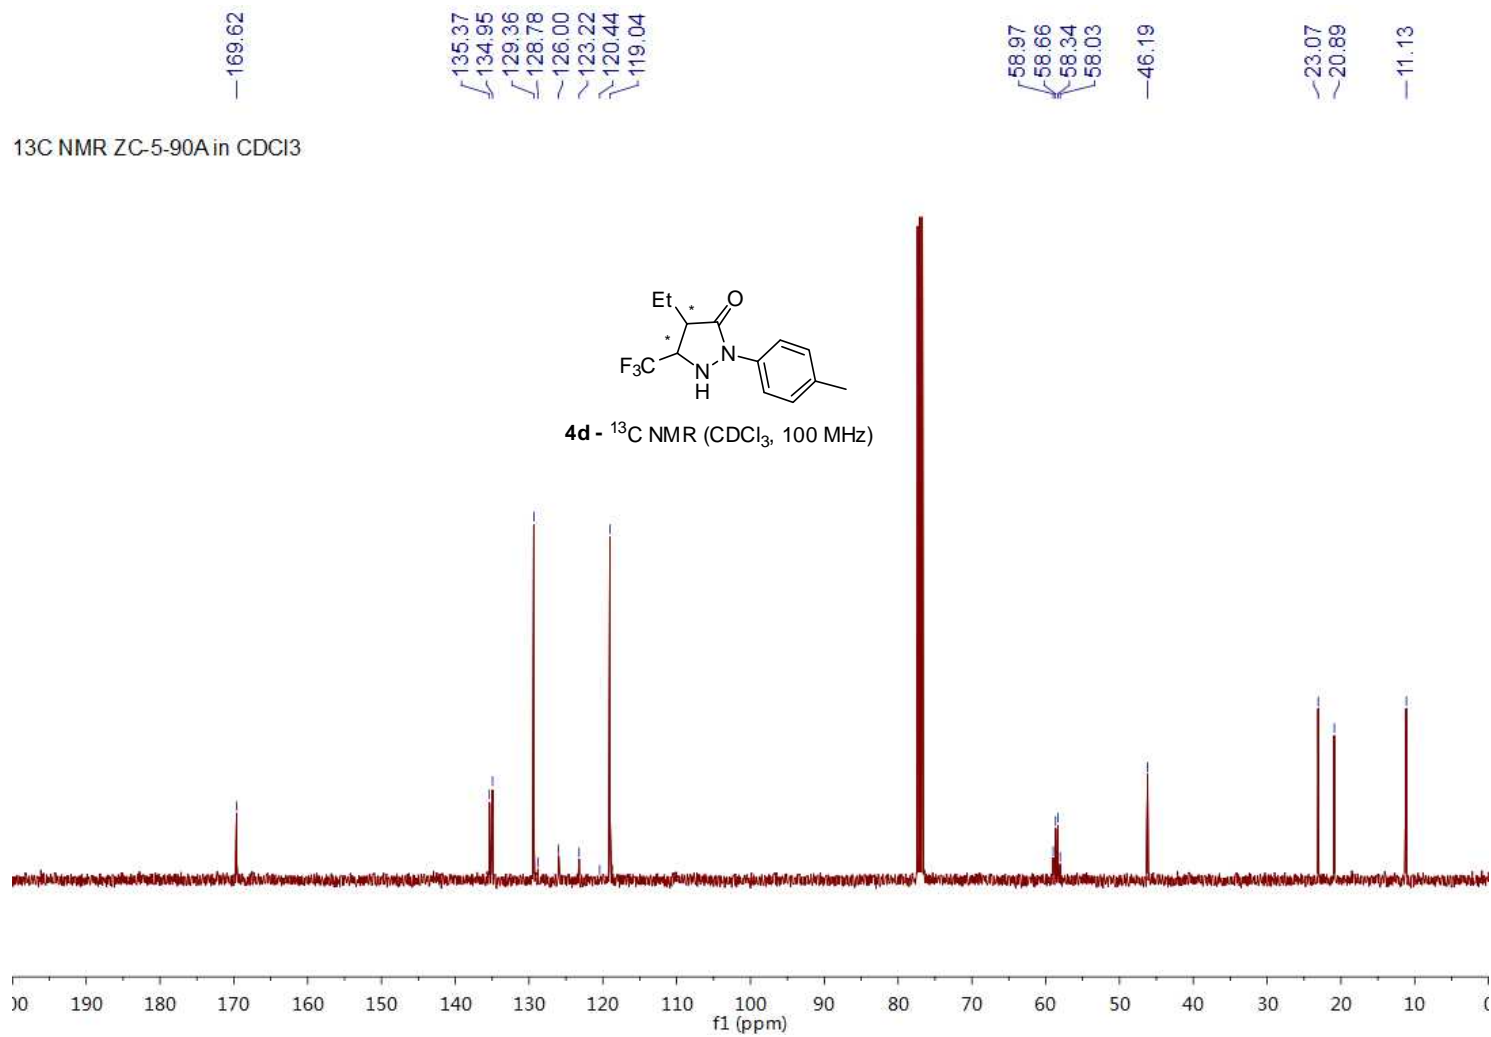

-77.71

<sup>19</sup>F NMR ZC-5-90A in CDCl<sub>3</sub>

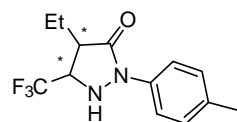

**4d** - <sup>19</sup>F NMR (CDCl<sub>3</sub>, 377 MHz)

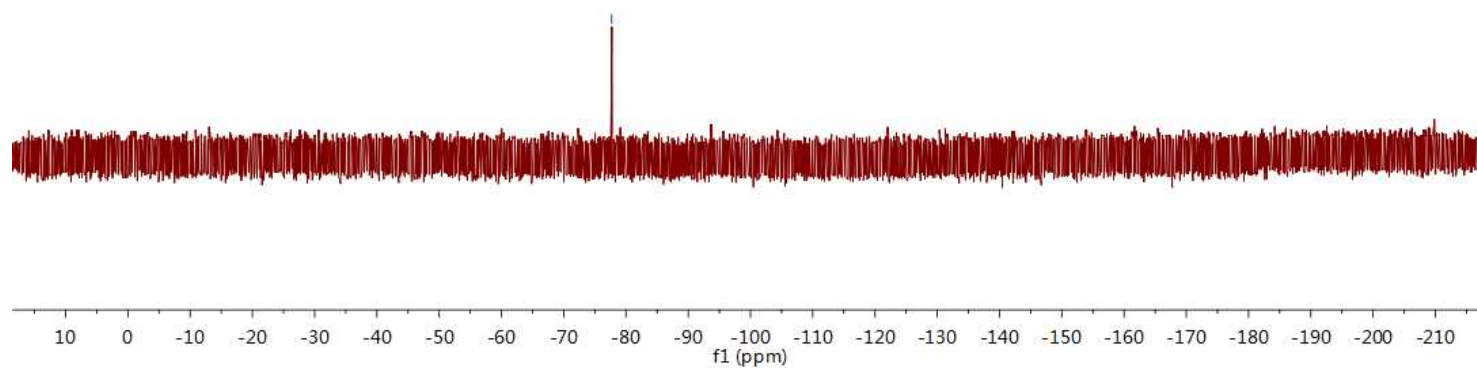

7.6212  
7.5953  
7.5747  
7.2554  
7.2395  
7.2197  
6.9815  
6.9626

5.0578

3.7475

2.7928  
2.7887  
2.7802  
2.7716  
2.7676  
2.7590  
2.3552  
1.9853  
1.9707  
1.9665  
1.8161  
1.7976  
1.7892  
1.7808  
1.0997  
1.0811

<sup>1</sup>H NMR ZC-5-90B in CDCl<sub>3</sub>

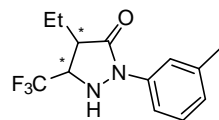

**4e** - <sup>1</sup>H NMR (CDCl<sub>3</sub>, 400 MHz)

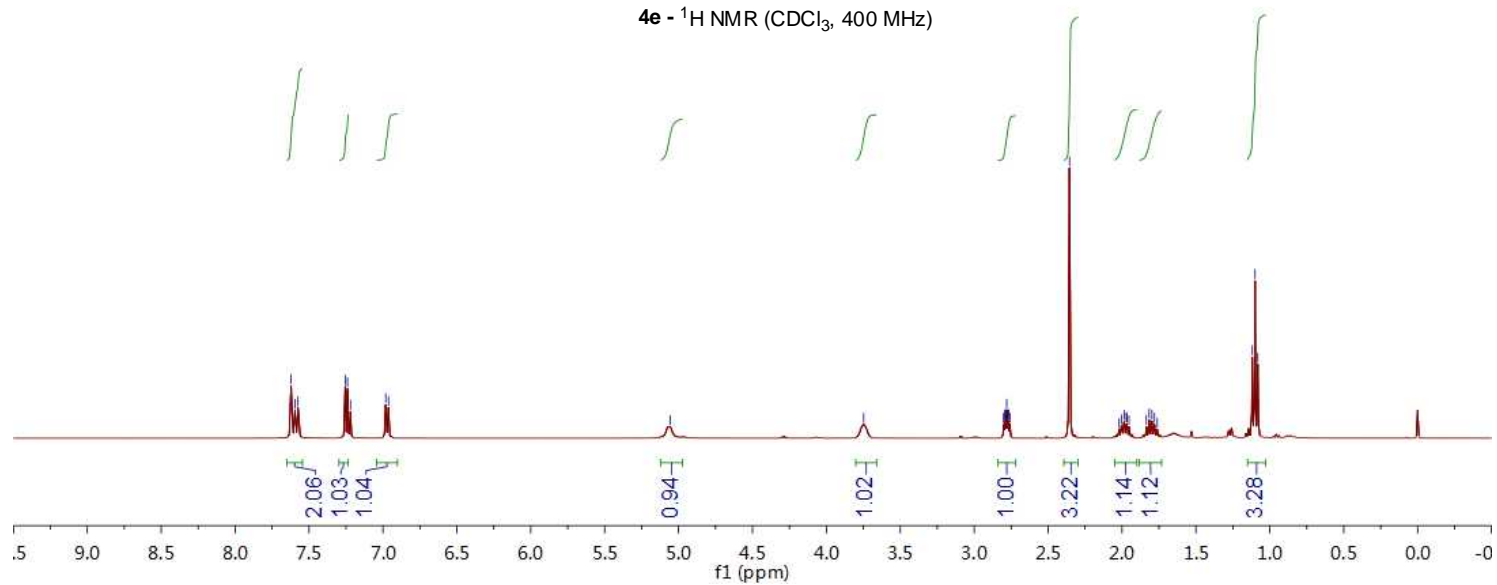



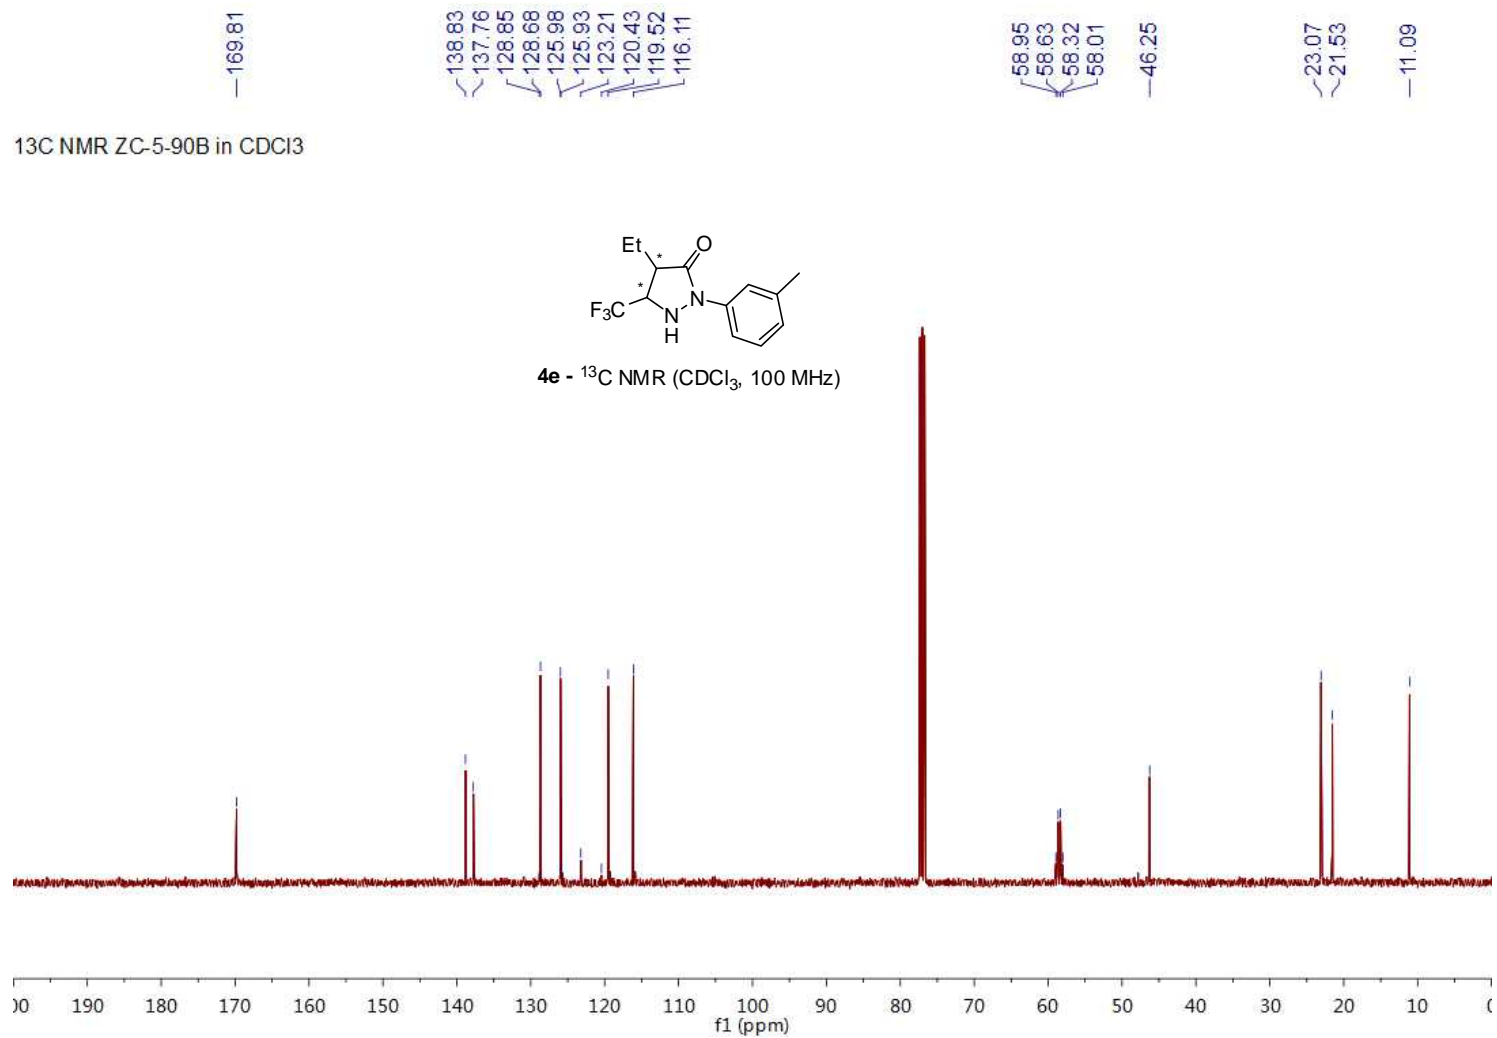

<sup>19</sup>F NMR ZC-5-90B in CDCl<sub>3</sub>

—77.68

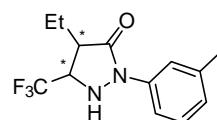

**4e** - <sup>19</sup>F NMR (CDCl<sub>3</sub>, 377 MHz)

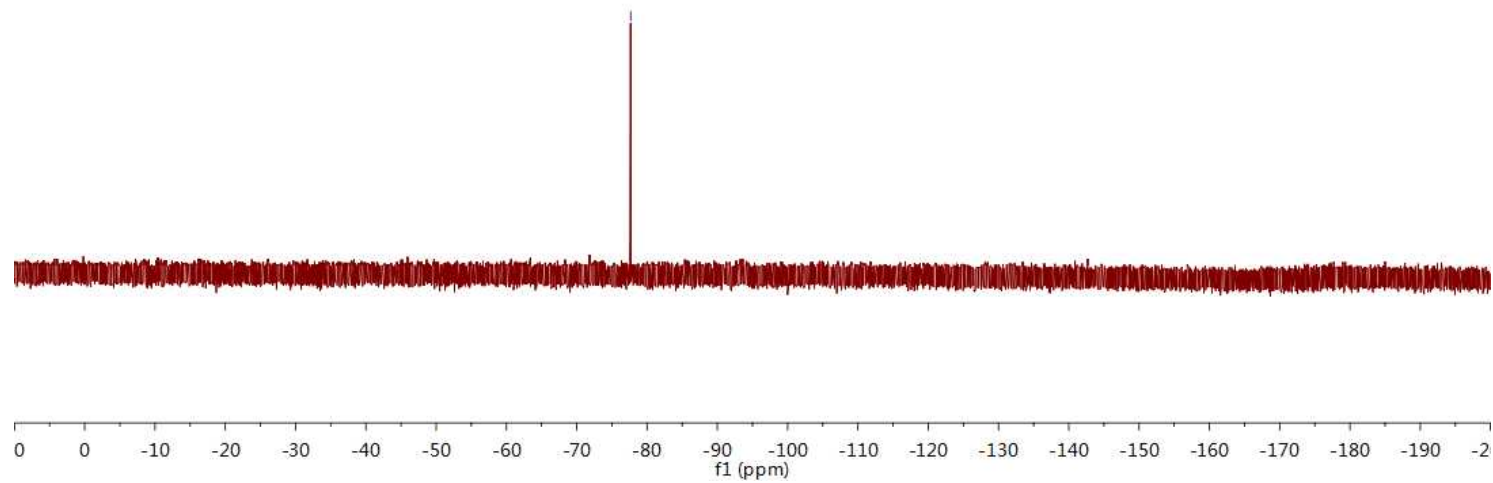

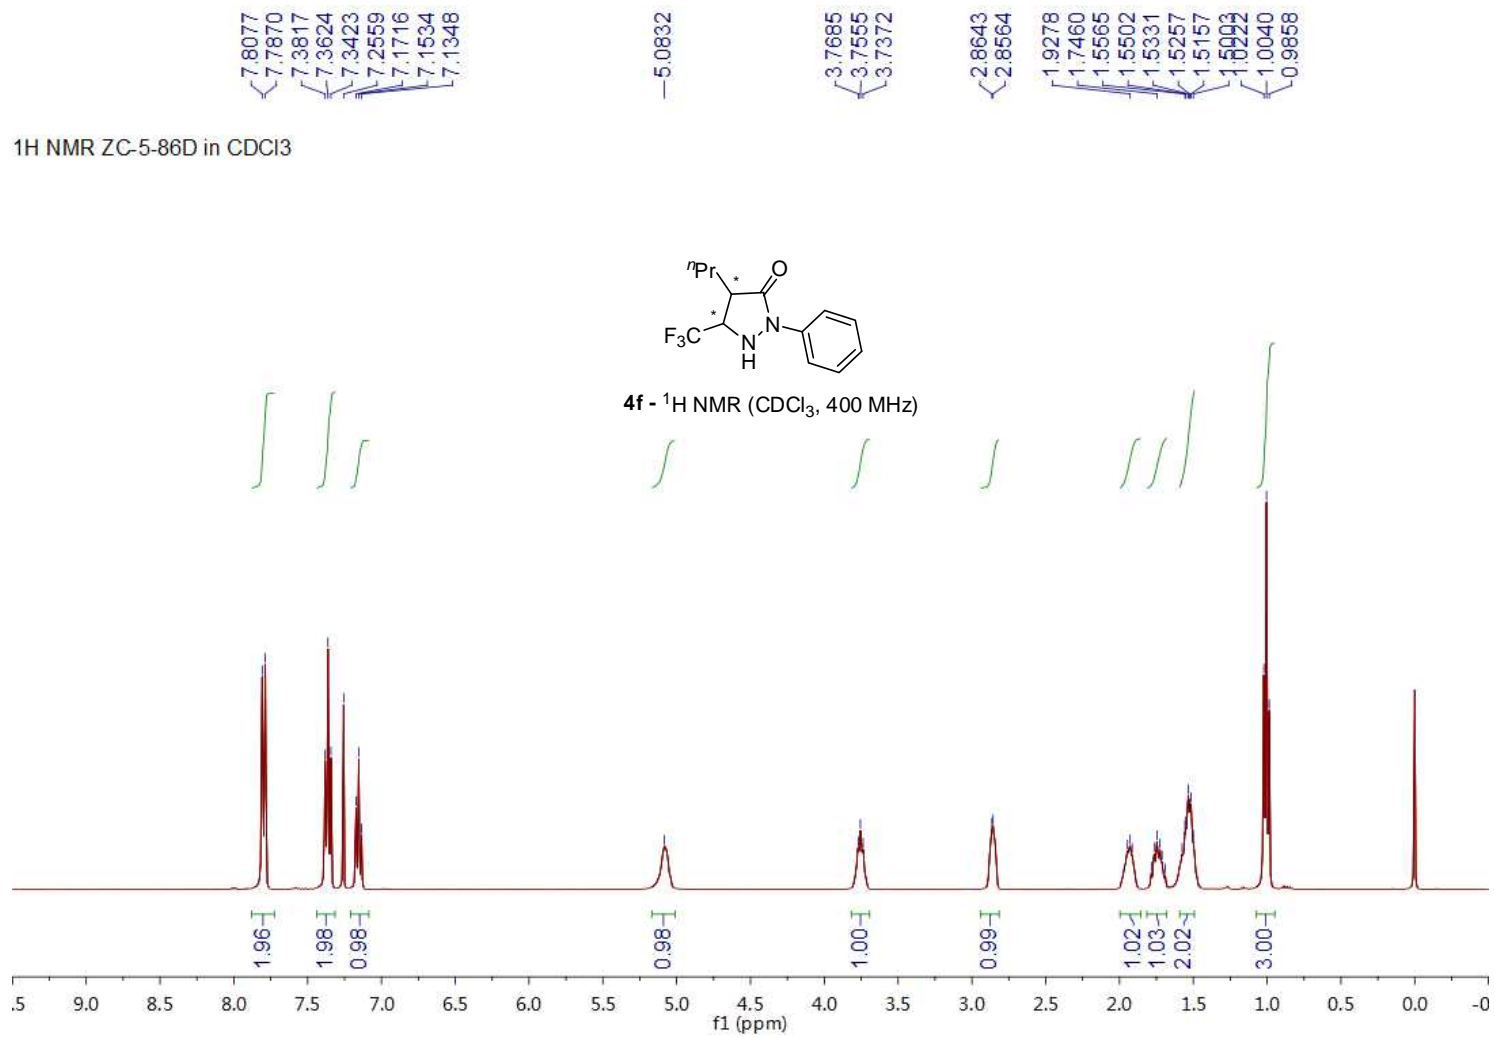

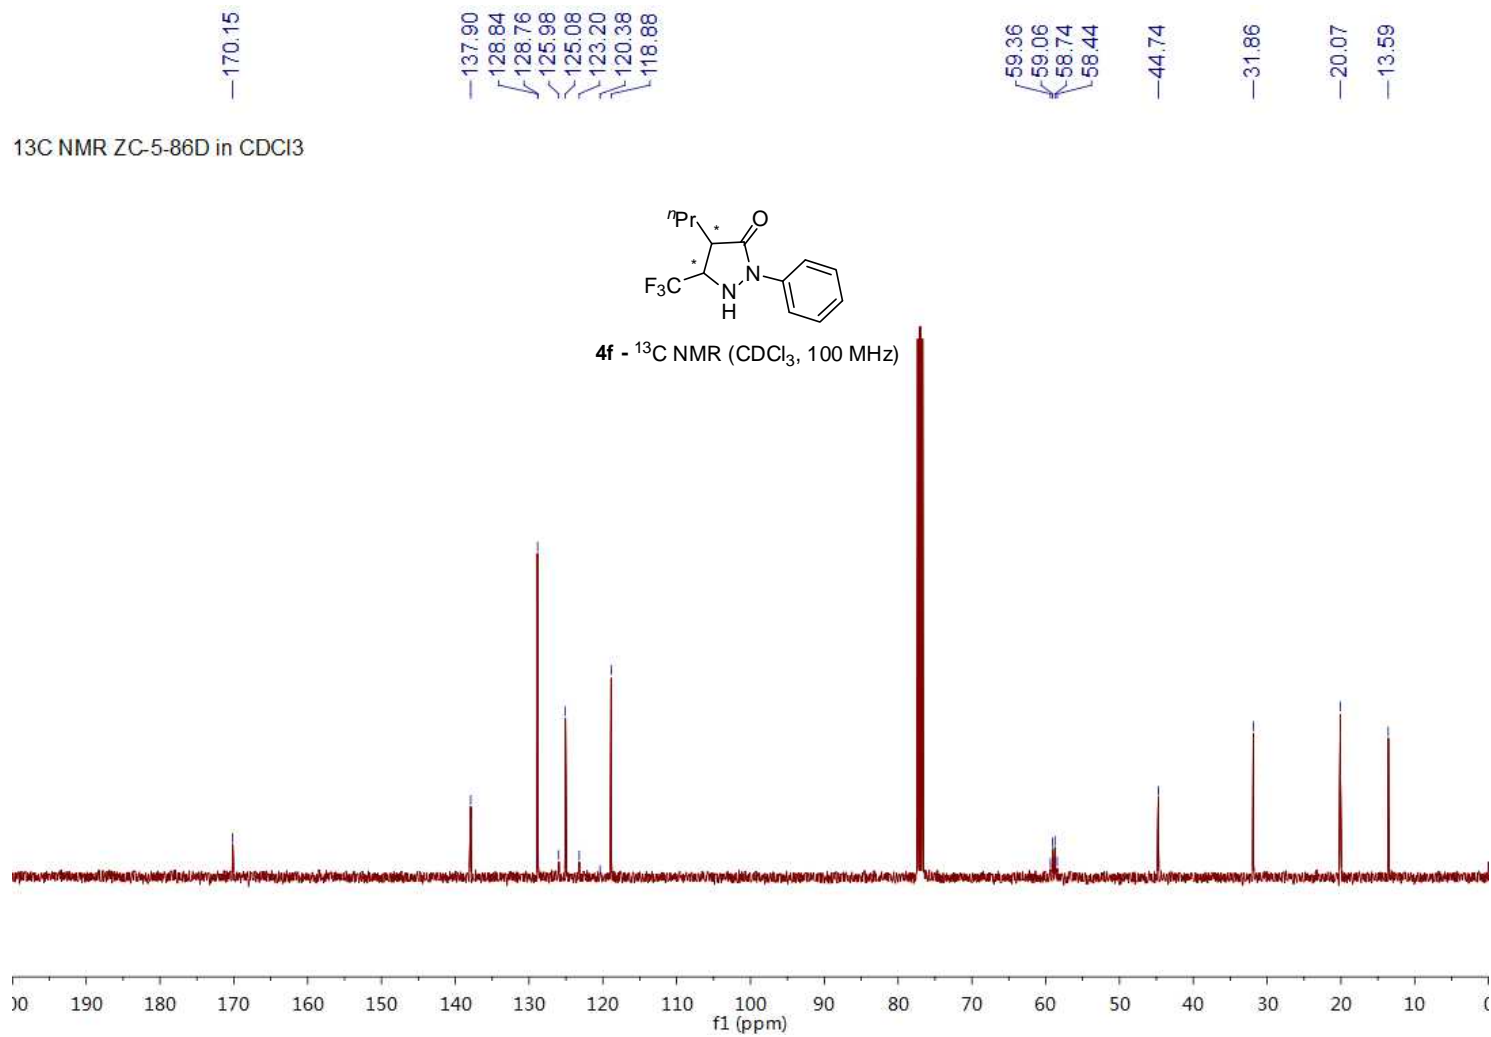

<sup>19</sup>F NMR ZC-5-86D in CDCl<sub>3</sub>

---77.75

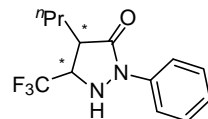

4f - <sup>19</sup>F NMR (CDCl<sub>3</sub>, 377 MHz)

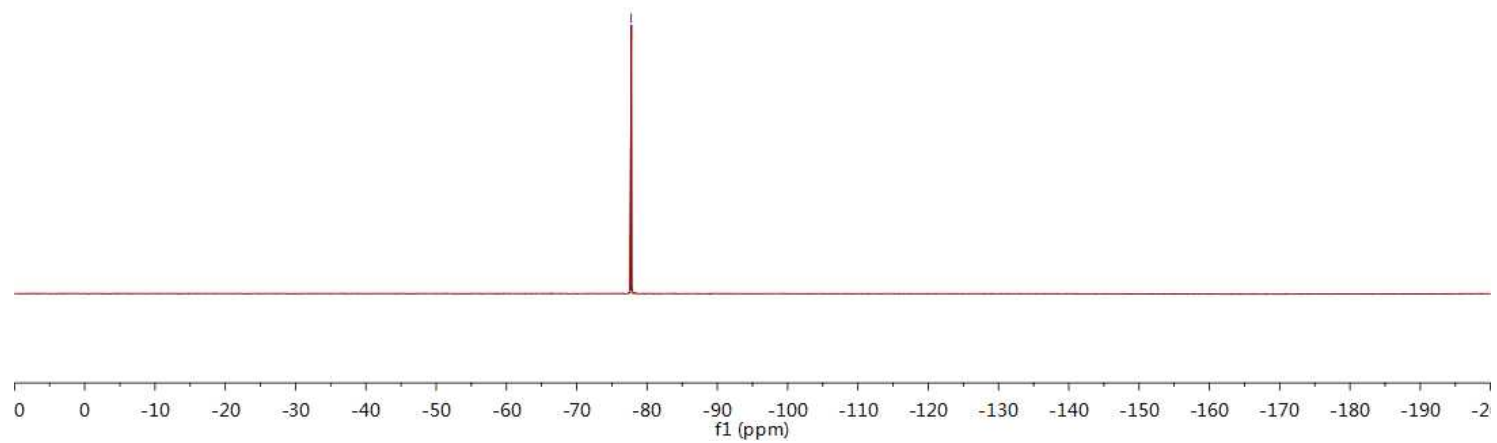

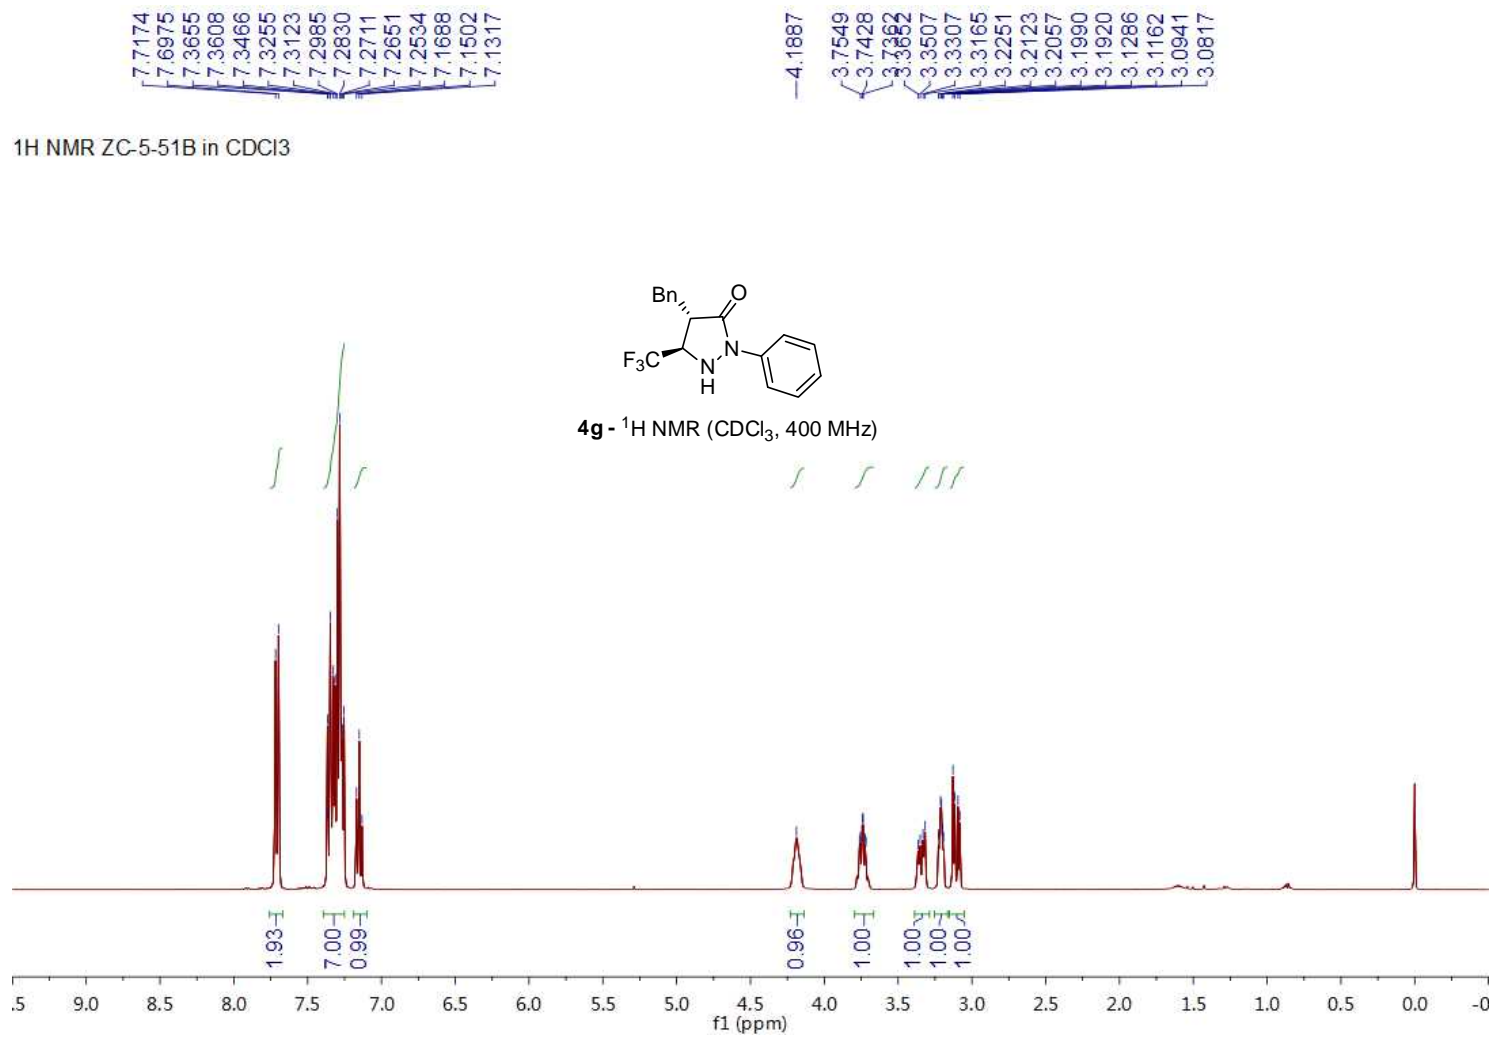

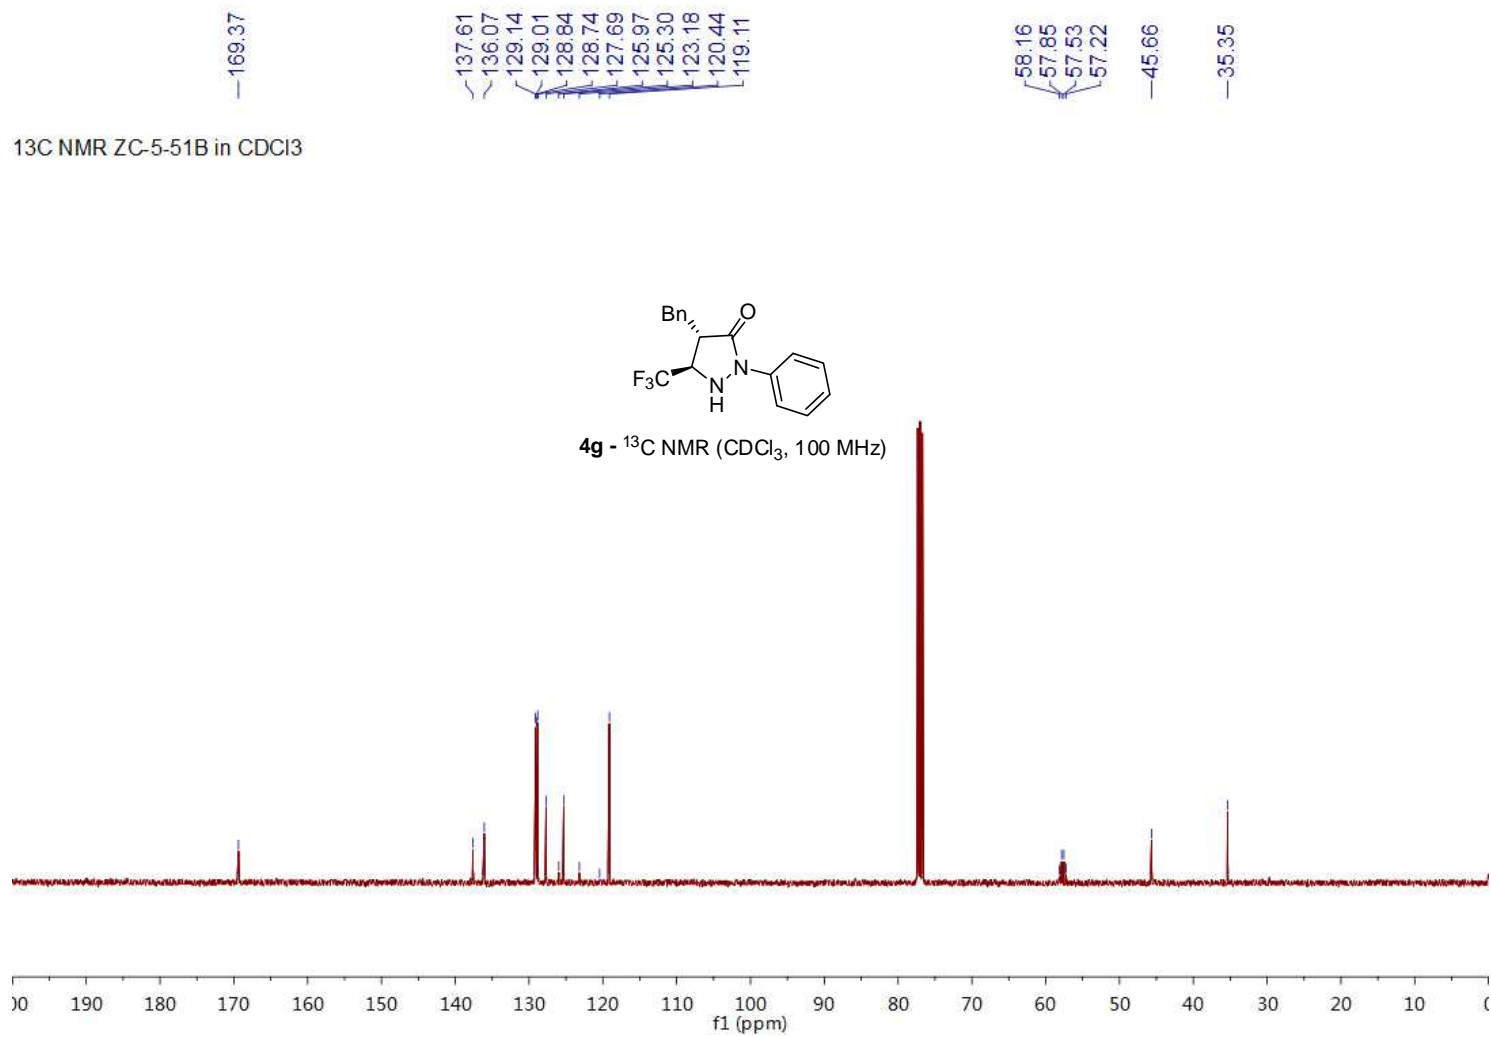

--77.50

<sup>19</sup>F NMR ZC-5-51B in CDCl<sub>3</sub>

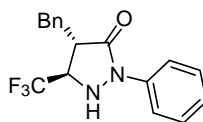

**4g** - <sup>19</sup>F NMR (CDCl<sub>3</sub>, 377 MHz)

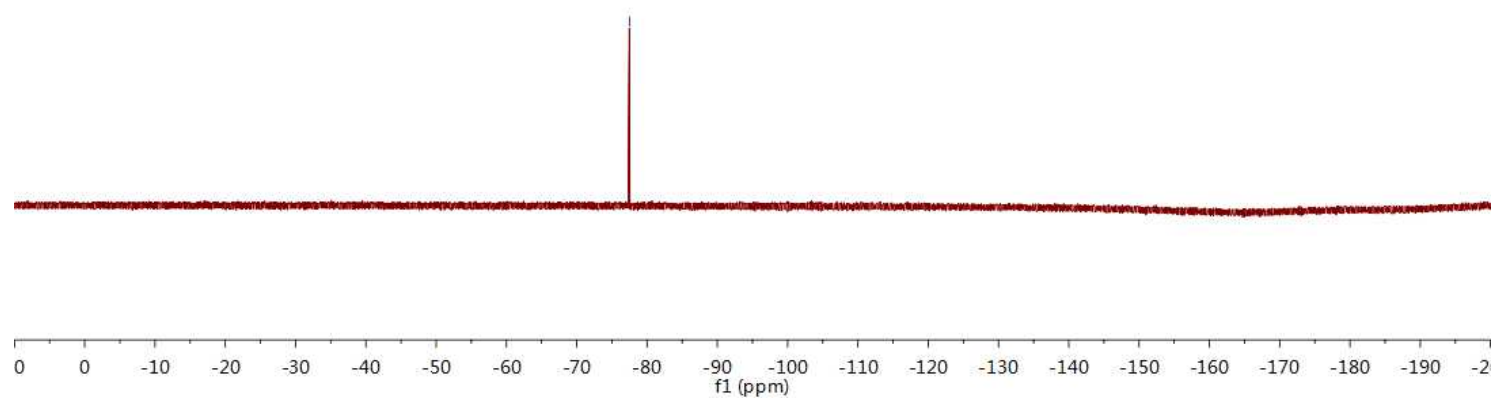



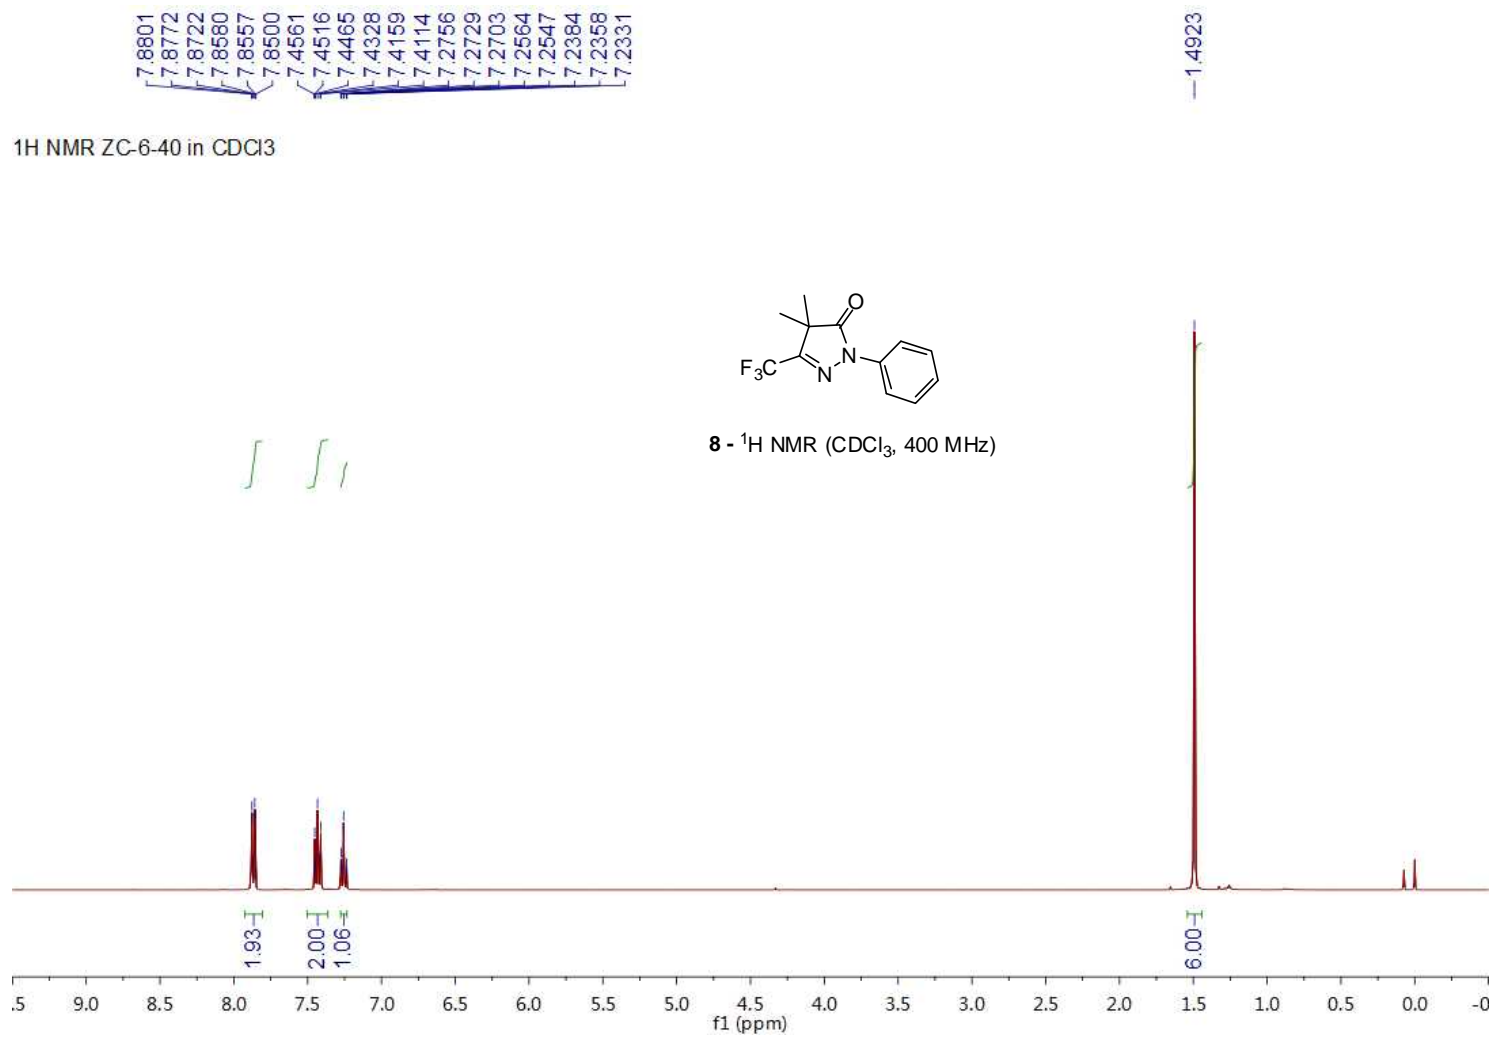

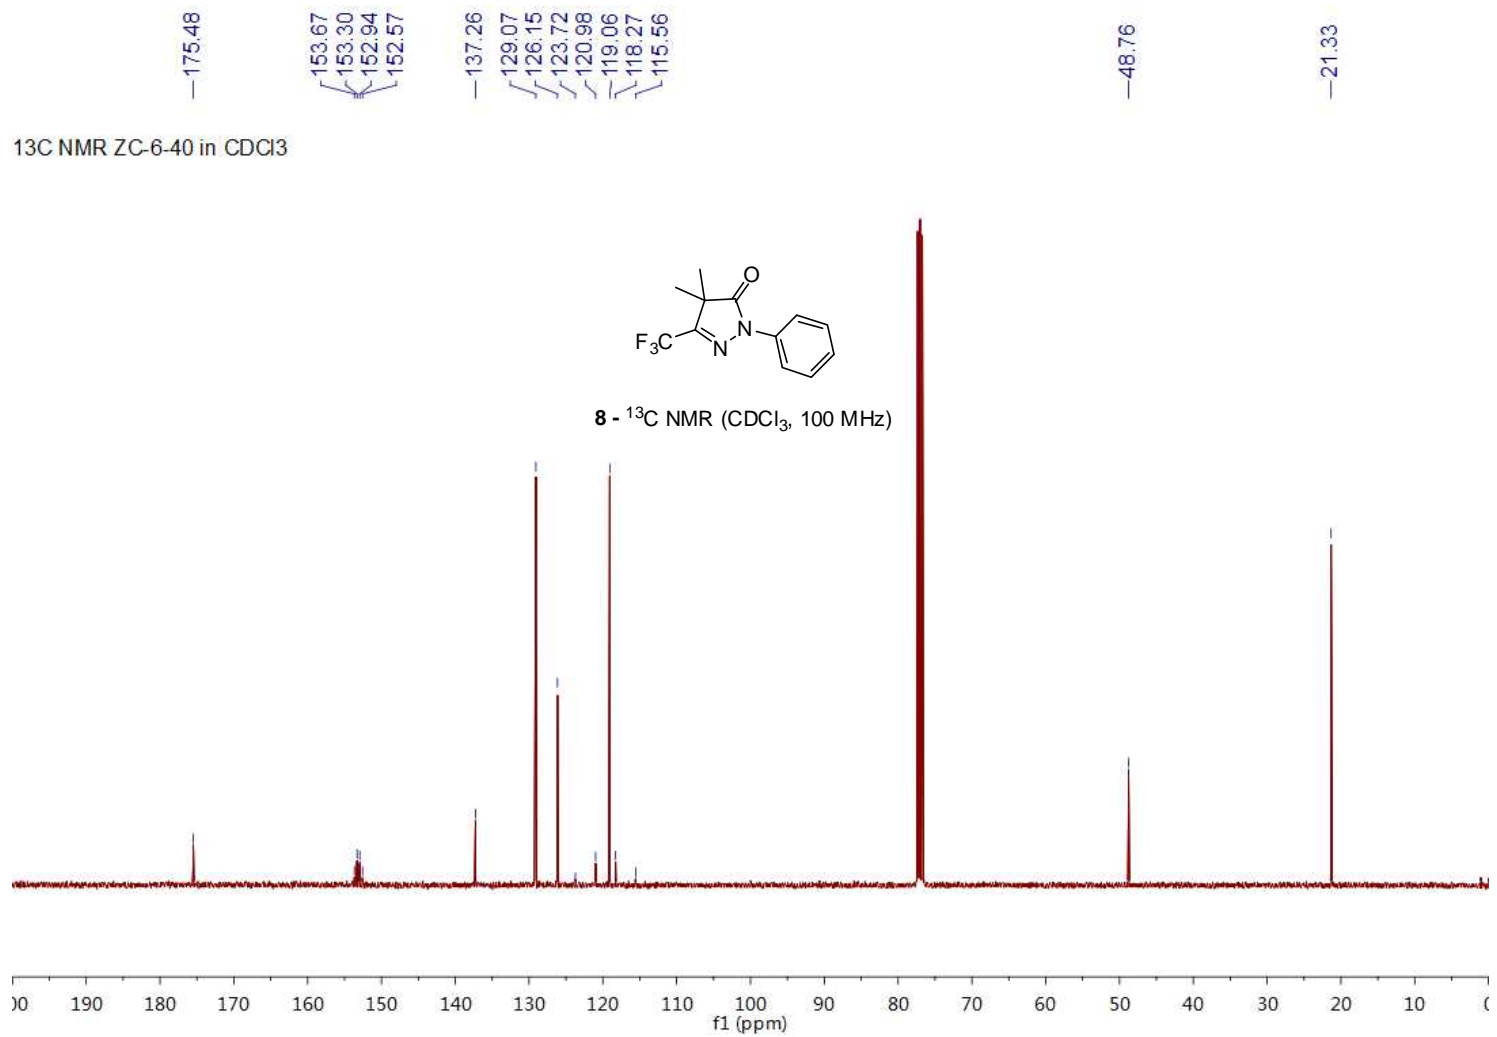

<sup>19</sup>F NMR ZC-6-40 in CDCl<sub>3</sub>

-65.09

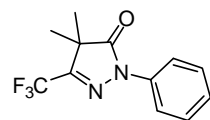

**8** - <sup>19</sup>F NMR (CDCl<sub>3</sub>, 377 MHz)

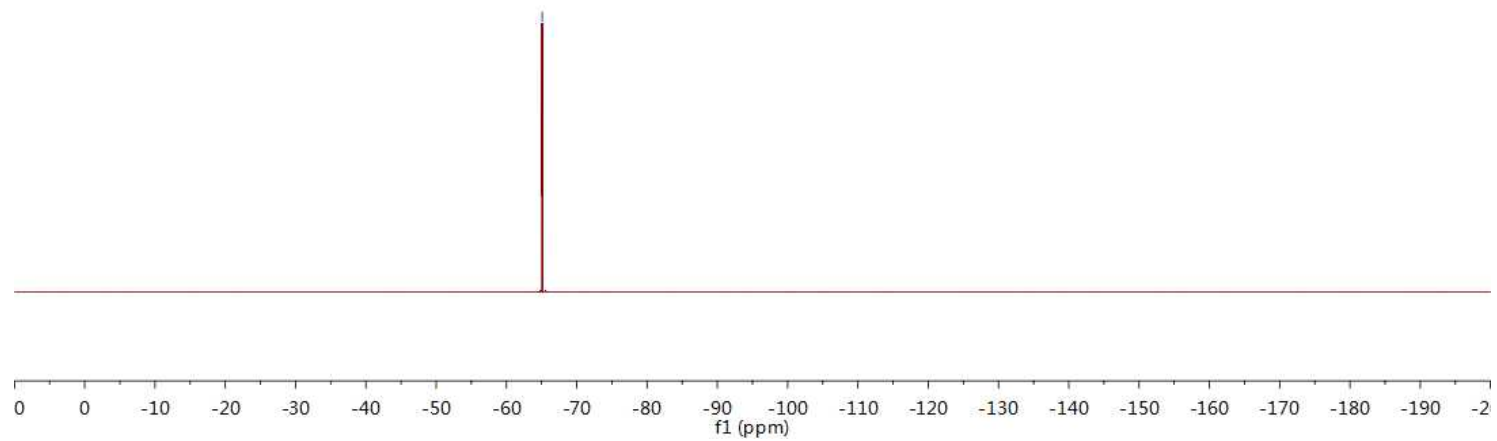

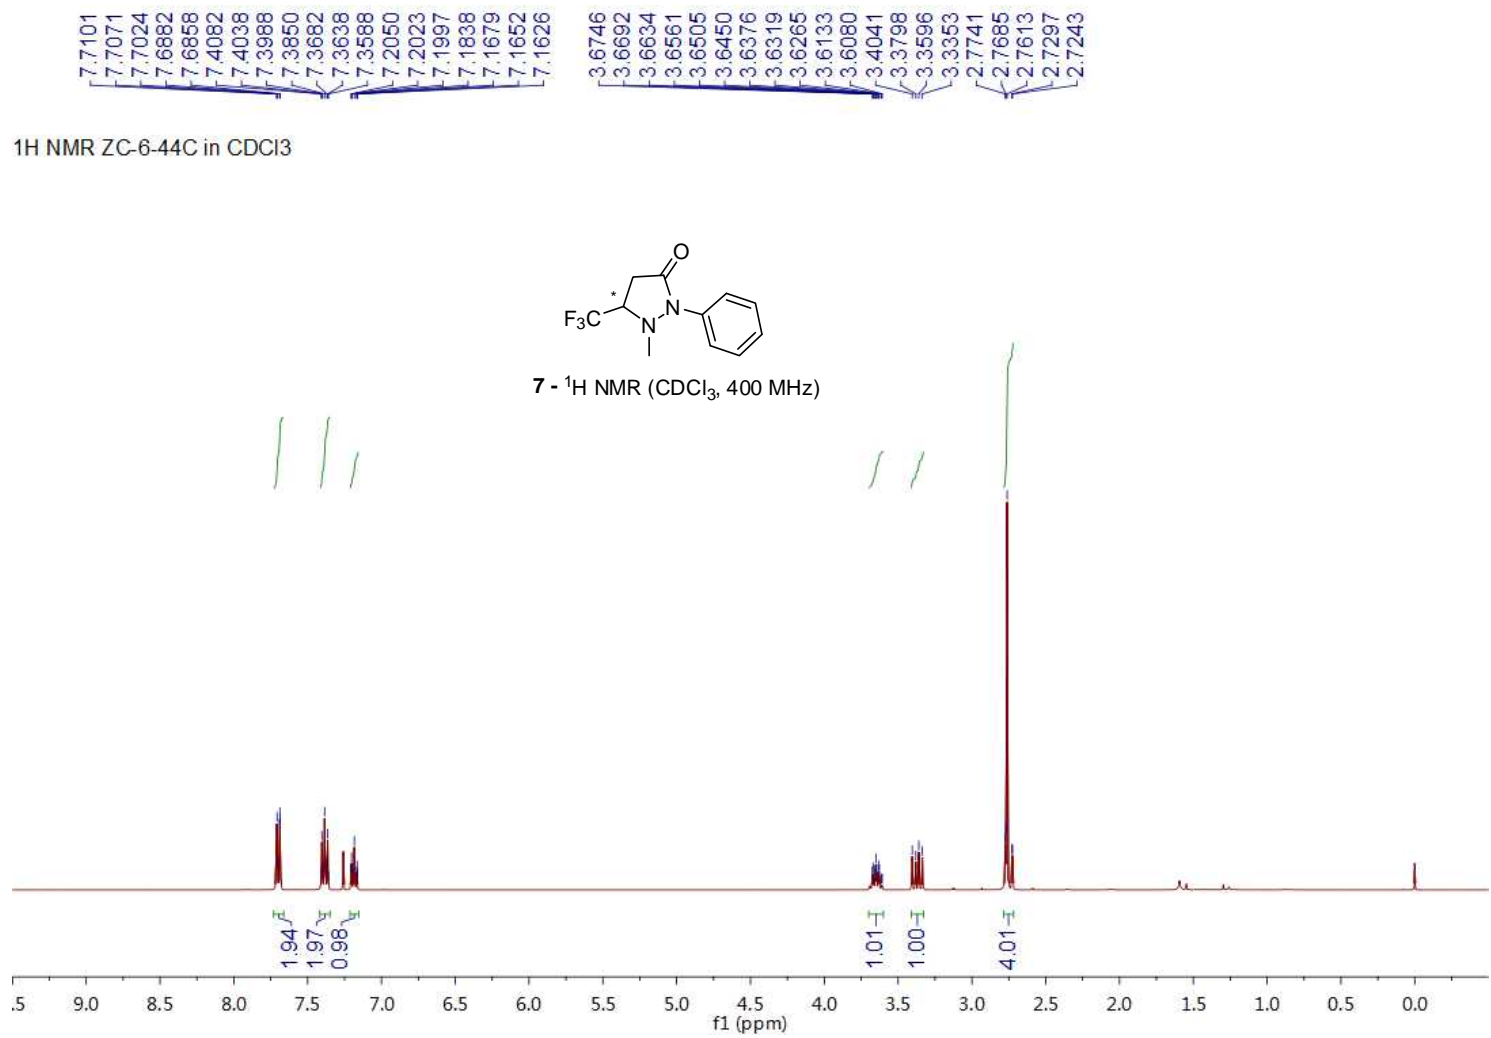

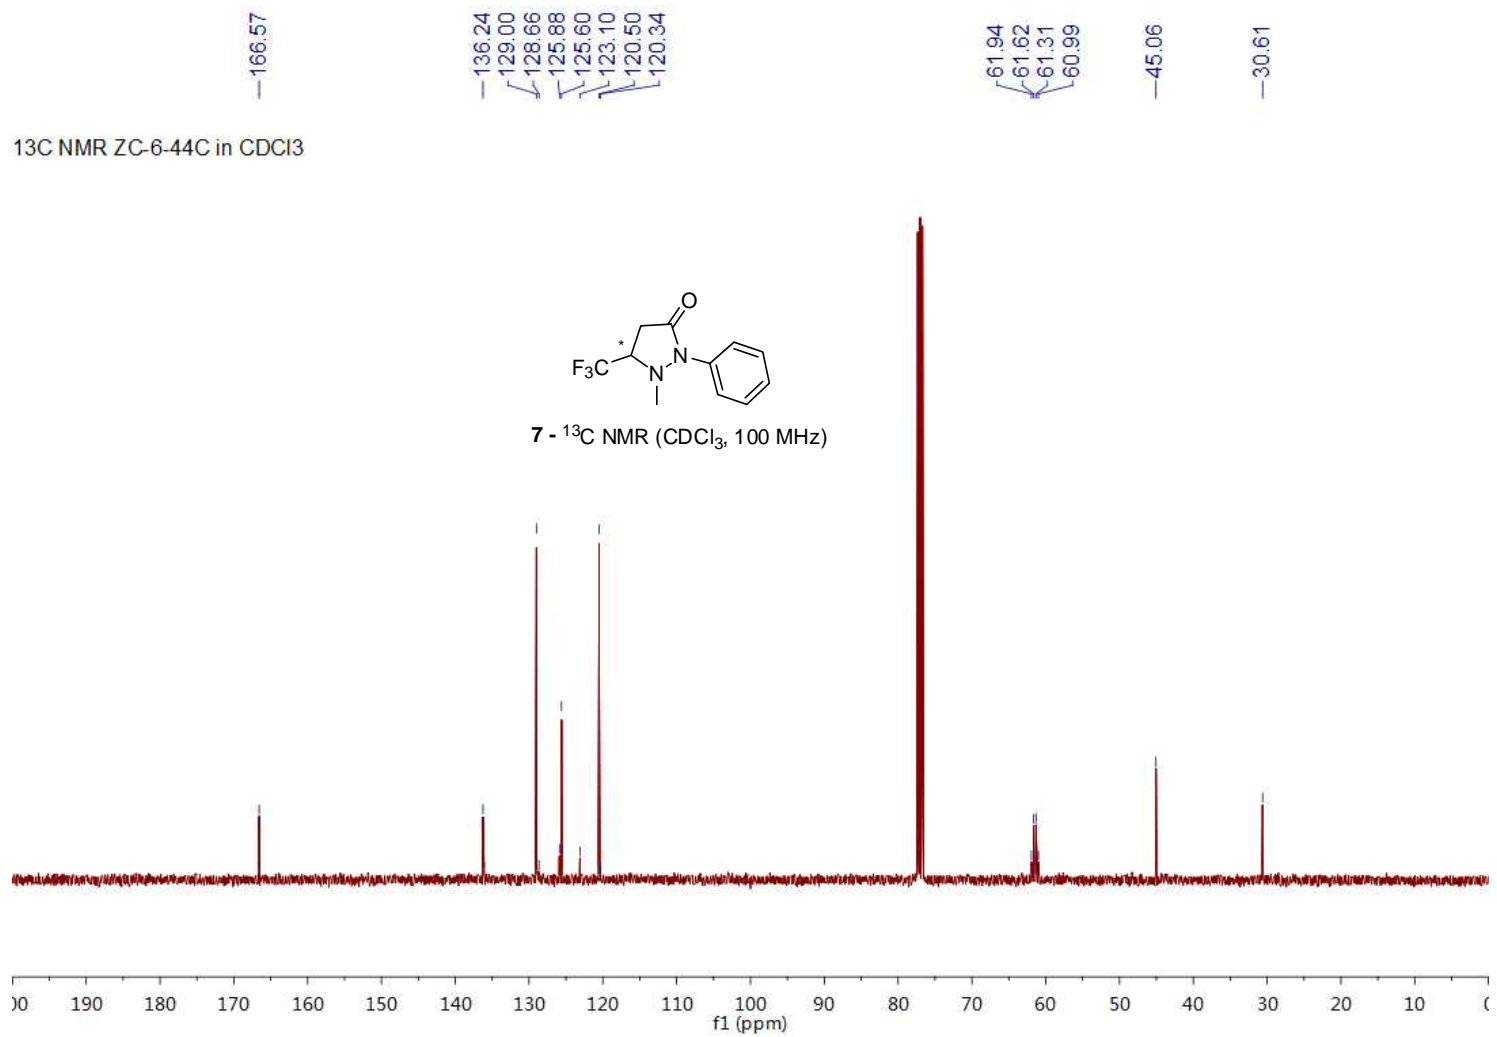

<sup>19</sup>F NMR ZC-6-44C in CDCl<sub>3</sub>

78.72

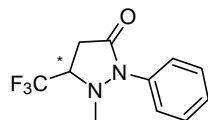

7 - <sup>19</sup>F NMR (CDCl<sub>3</sub>, 377 MHz)

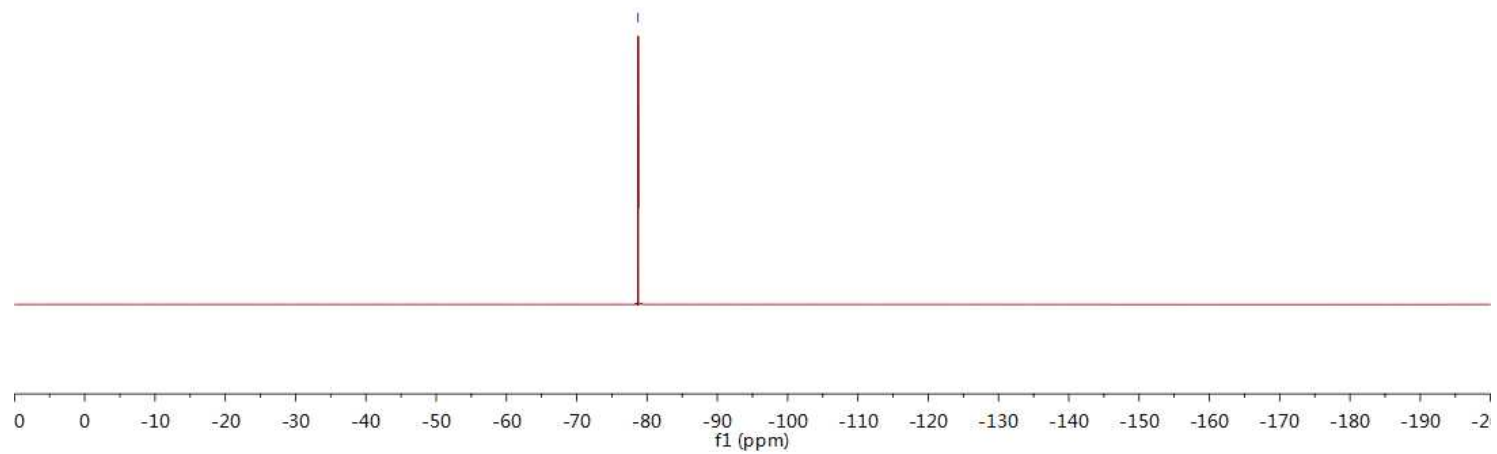

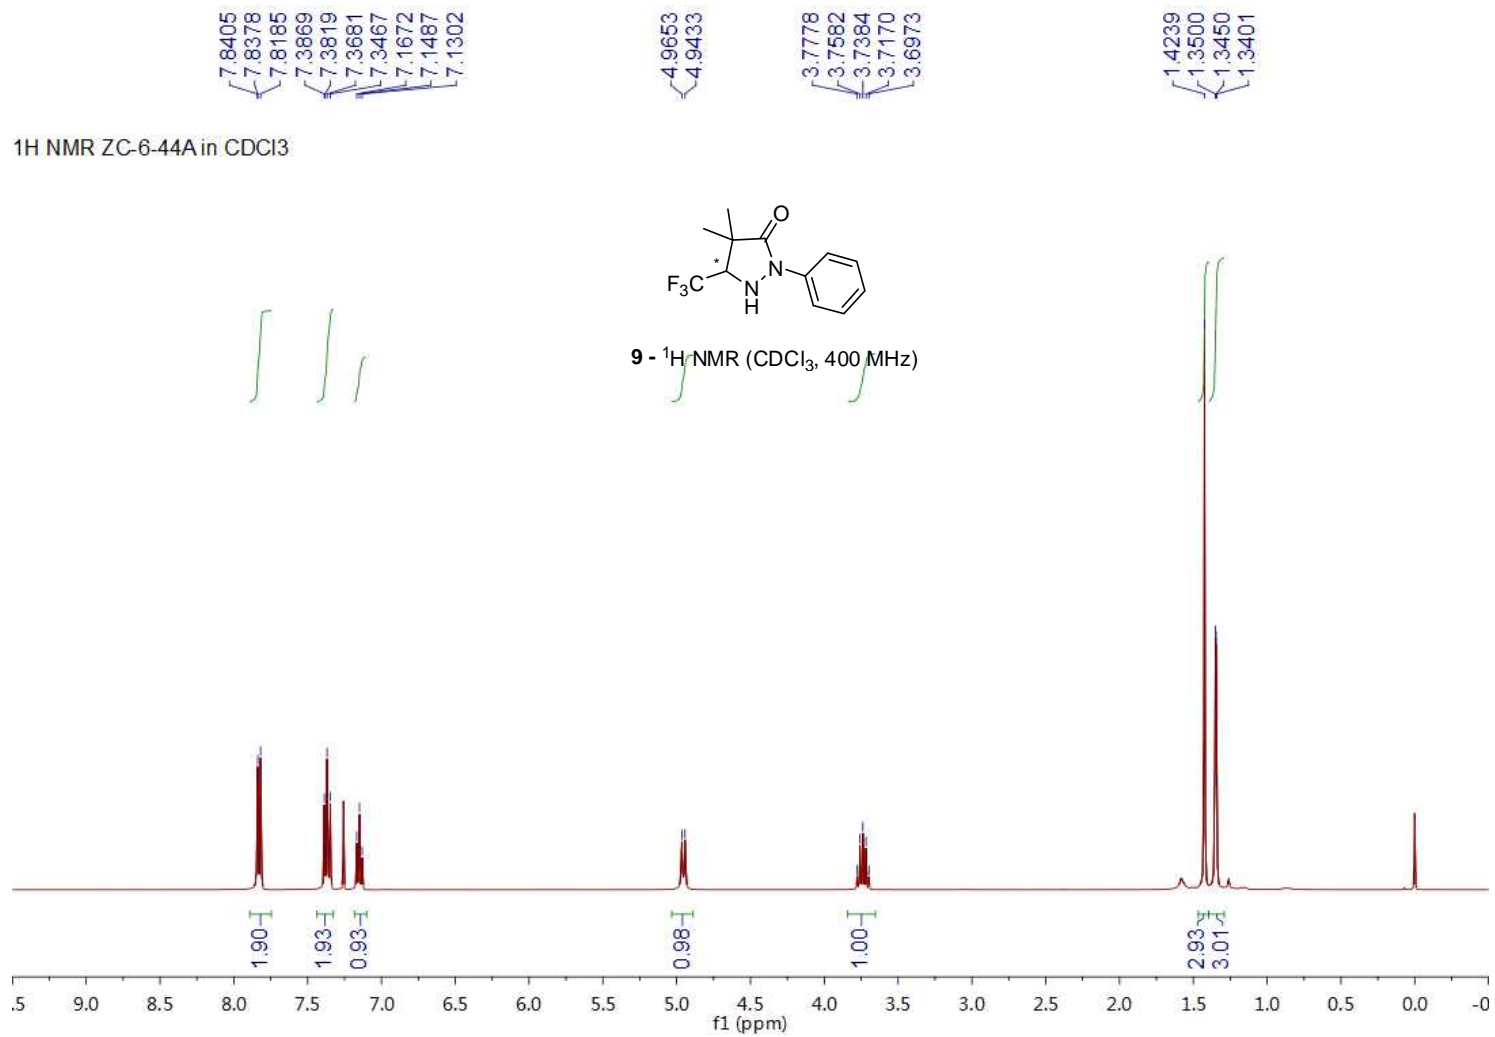

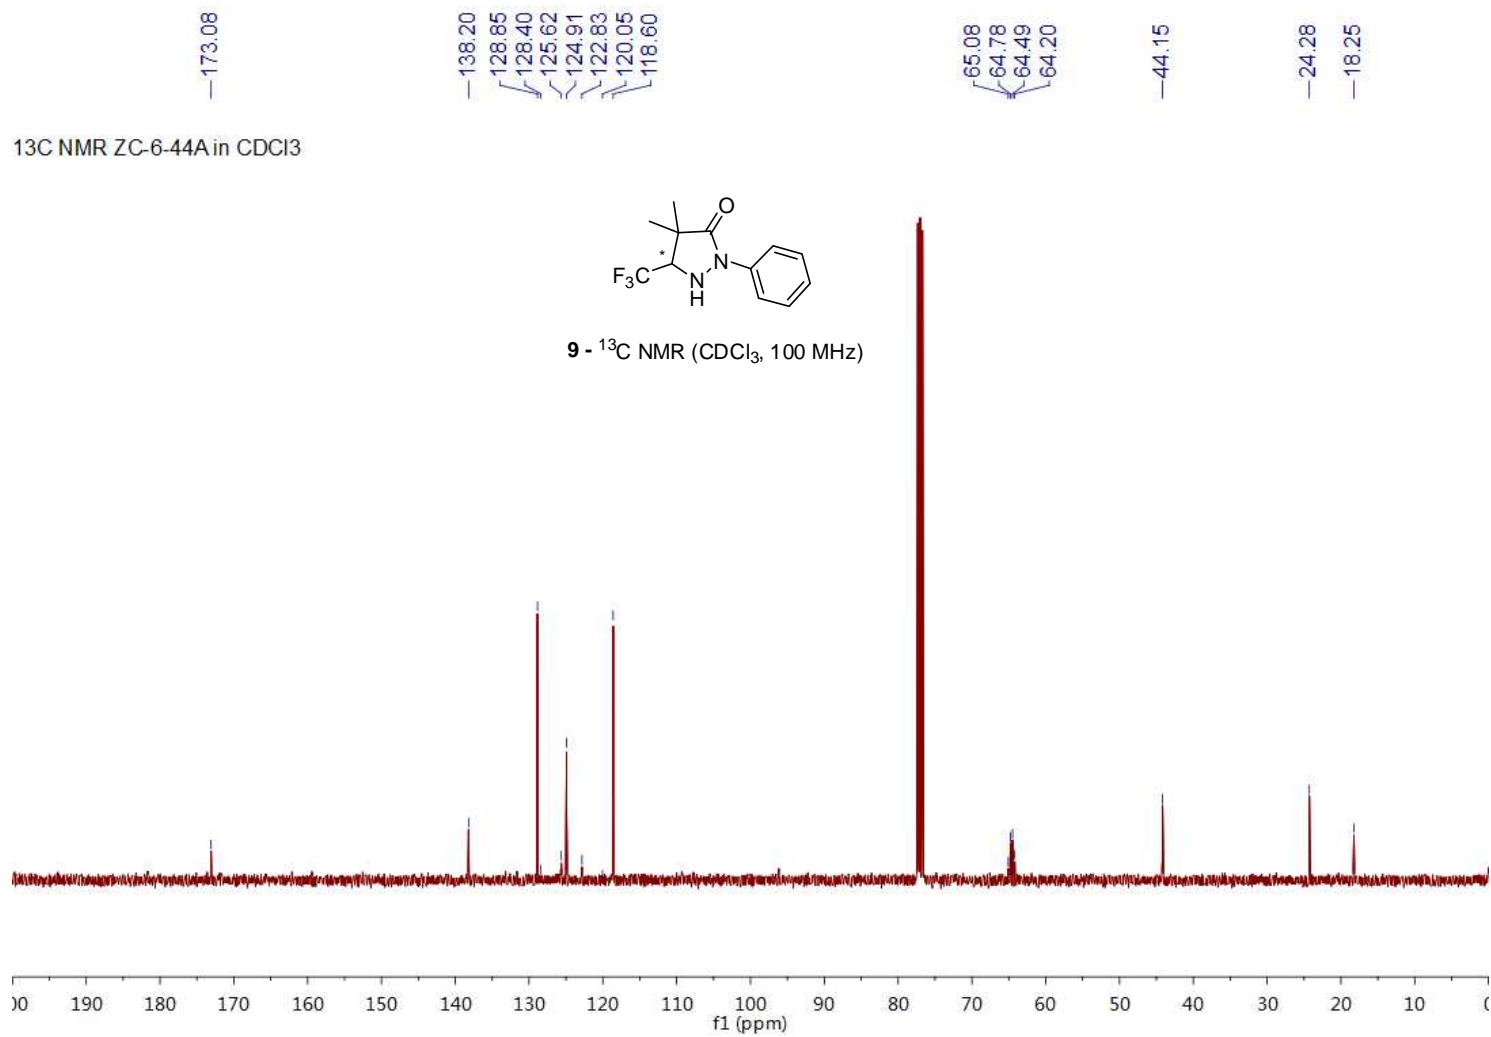



<sup>19</sup>F NMR ZC-6-44A in CDCl<sub>3</sub>

---70.97

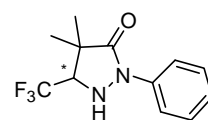

9 - <sup>19</sup>F NMR (CDCl<sub>3</sub>, 377 MHz)

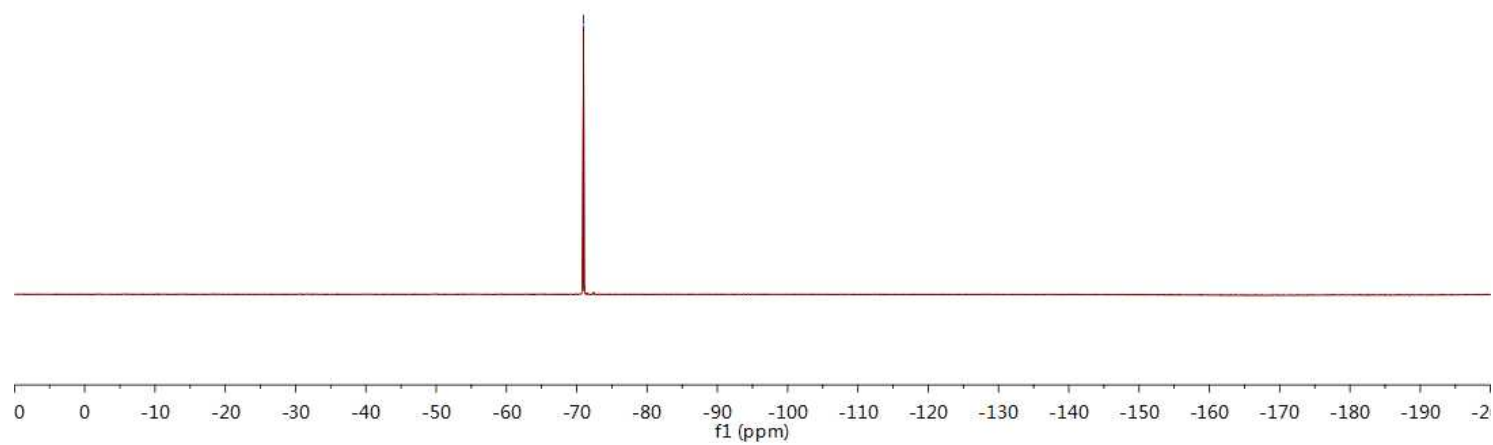

## 9. Copy of HPLC for Racemic and Chiral Products

Data File C:\CHEM32\1\DATA\ZHOU-14\YZN005068.D  
Sample Name: ZC-M-20A+

```

=====
Acq. Operator   : Z
Acq. Instrument : Instrument 1           Location : Vial 1
Injection Date  : 5/16/2014 3:37:35 PM
Acq. Method     : C:\CHEM32\1\METHODS\DEF LC.M
Last changed    : 5/16/2014 2:57:52 PM by Z
                  (modified after loading)
Analysis Method : C:\CHEM32\1\METHODS\DEF LC.M
Last changed    : 5/26/2014 2:25:21 PM by Z
                  (modified after loading)
Sample Info     : AD-H, H/i-PrOH = 70/30, 0.7 mL/min, 30 oC, 254 nm
=====
    
```

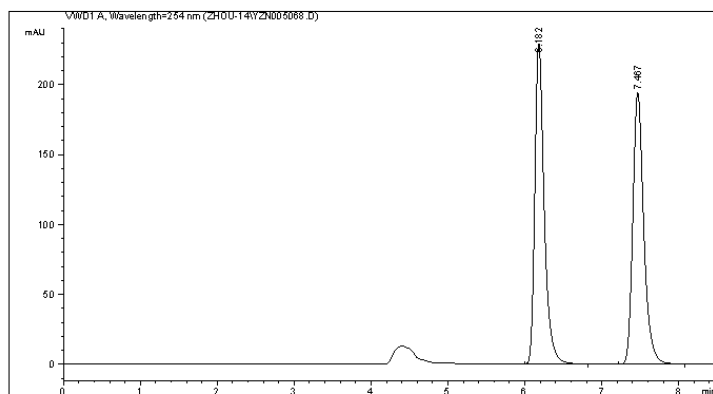

Area Percent Report

```

=====
Sorted By      : Signal
Multiplier:    : 1.0000
Dilution:      : 1.0000
Use Multiplier & Dilution Factor with ISTDs
    
```

Signal 1: VWD1 A, Wavelength=254 nm

| Peak # | RetTime [min] | Type | Width [min] | Area [mAU] | Area %    | Height [mAU] | Area % |
|--------|---------------|------|-------------|------------|-----------|--------------|--------|
| 1      | 6.182         | BB   | 0.1276      | 1936.70898 | 229.33224 | 50.3419      |        |
| 2      | 7.467         | BB   | 0.1496      | 1910.39893 | 194.30939 | 49.6581      |        |

Totals : 3847.10791 423.64163

\*\*\* End of Report \*\*\*

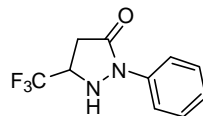

(+/-) - 2a

Data File C:\CHEM32\1\DATA\ZHOU-14\YZN005339.D  
Sample Name: ZC-5-59A

```

=====
Acq. Operator   : Z
Acq. Instrument : Instrument 1           Location : Vial 1
Injection Date   : 6/20/2014 9:37:41 AM
Acq. Method     : C:\CHEM32\1\METHODS\DEF LC.M
Last changed    : 6/20/2014 8:58:39 AM by Z
                  (modified after loading)
Analysis Method : C:\CHEM32\1\METHODS\DEF LC.M
Last changed    : 12/8/2014 8:57:12 AM by Z
                  (modified after loading)
Sample Info     : AD-H, H/i-PrOH = 70/30, 0.7 mL/min, 30 oC, 254 nm
=====
    
```

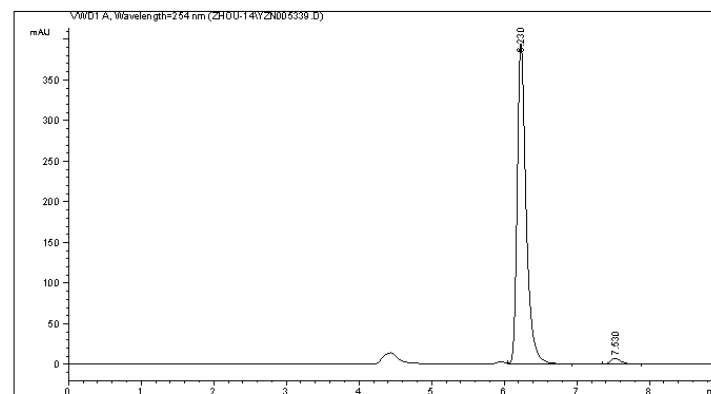

Area Percent Report

```

=====
Sorted By      : Signal
Multiplier:    : 1.0000
Dilution:      : 1.0000
Use Multiplier & Dilution Factor with ISTDs
    
```

Signal 1: VWD1 A, Wavelength=254 nm

| Peak # | RetTime [min] | Type | Width [min] | Area [mAU] | Area %    | Height [mAU] | Area % |
|--------|---------------|------|-------------|------------|-----------|--------------|--------|
| 1      | 6.230         | VB   | 0.1287      | 3367.25513 | 394.48074 | 97.9239      |        |
| 2      | 7.530         | BB   | 0.1472      | 71.39044   | 7.32410   | 2.0761       |        |

Totals : 3438.64557 401.80484

\*\*\* End of Report \*\*\*

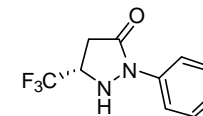

(+) - 2a

Data File C:\CHEM32\1\DATA\ZH00-14\YZN005667.D  
 Sample Name: ZC-5-83A+-

=====  
 Acq. Operator : Z  
 Acq. Instrument : Instrument 1 Location : Vial 1  
 Injection Date : 7/24/2014 2:36:06 PM  
 Acq. Method : C:\CHEM32\1\METHODS\DEF LC.M  
 Last changed : 7/24/2014 2:34:41 PM by Z  
 (modified after loading)  
 Analysis Method : C:\CHEM32\1\METHODS\DEF LC.M  
 Last changed : 12/8/2014 9:00:48 AM by Z  
 (modified after loading)  
 Sample Info : AD-H , H/1-PrOH = 80/20, 0.70 mL/min, 30 oC, 254 nm

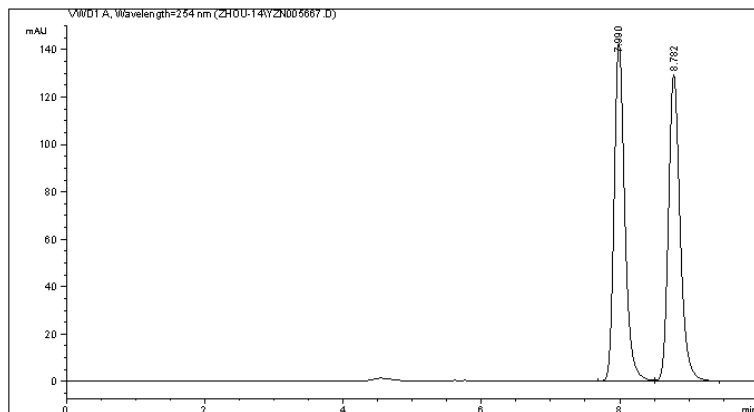

=====  
 Area Percent Report  
 =====

Sorted By : Signal  
 Multiplier: : 1.0000  
 Dilution: : 1.0000  
 Use Multiplier & Dilution Factor with ISTDs

Signal 1: VWD1 A, Wavelength=254 nm

| Peak # | RetTime [min] | Type | Width [min] | Area [mAU*s] | Height [mAU] | Area %  |
|--------|---------------|------|-------------|--------------|--------------|---------|
| 1      | 7.990         | BV   | 0.1639      | 1524.40454   | 142.75763    | 50.1431 |
| 2      | 8.782         | VB   | 0.1789      | 1515.70349   | 129.41541    | 49.8569 |

Totals : 3040.10803 272.17303

=====  
 \*\*\* End of Report \*\*\*

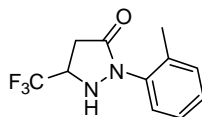

(+/-) - 2b

Data File C:\CHEM32\1\DATA\ZH00-14\YZN005666.D  
 Sample Name: ZC-5-83A

=====  
 Acq. Operator : Z  
 Acq. Instrument : Instrument 1 Location : Vial 1  
 Injection Date : 7/24/2014 2:20:43 PM  
 Acq. Method : C:\CHEM32\1\METHODS\DEF LC.M  
 Last changed : 7/24/2014 2:18:12 PM by Z  
 (modified after loading)  
 Analysis Method : C:\CHEM32\1\METHODS\DEF LC.M  
 Last changed : 12/8/2014 9:00:48 AM by Z  
 (modified after loading)  
 Sample Info : AD-H , H/1-PrOH = 80/20, 0.70 mL/min, 30 oC, 254 nm

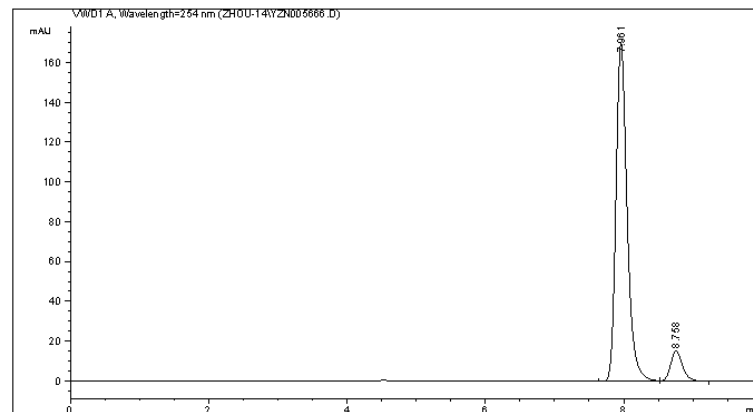

=====  
 Area Percent Report  
 =====

Sorted By : Signal  
 Multiplier: : 1.0000  
 Dilution: : 1.0000  
 Use Multiplier & Dilution Factor with ISTDs

Signal 1: VWD1 A, Wavelength=254 nm

| Peak # | RetTime [min] | Type | Width [min] | Area [mAU*s] | Height [mAU] | Area %  |
|--------|---------------|------|-------------|--------------|--------------|---------|
| 1      | 7.961         | BV   | 0.1701      | 1908.54773   | 170.18611    | 91.0756 |
| 2      | 8.758         | VB   | 0.1866      | 187.01726    | 15.27134     | 8.9244  |

Totals : 2095.56499 185.45745

=====  
 \*\*\* End of Report \*\*\*

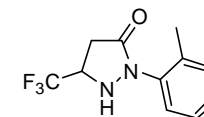

(+) - 2b

Data File C:\CHEM32\1\DATA\ZH00-14\YZN005613.D  
 Sample Name: ZC-5-81B--

=====  
 Acq. Operator : Z  
 Acq. Instrument : Instrument 1 Location : Vial 1  
 Injection Date : 7/21/2014 4:25:12 PM  
 Acq. Method : C:\CHEM32\1\METHODS\DEF LC.M  
 Last changed : 7/21/2014 4:24:42 PM by Z  
 (modified after loading)  
 Analysis Method : C:\CHEM32\1\METHODS\DEF LC.M  
 Last changed : 12/8/2014 9:00:48 AM by Z  
 (modified after loading)  
 Sample Info : AD-H , H/1-PrOH = 70/30, 0.7 mL/min, 30 oC, 254 nm

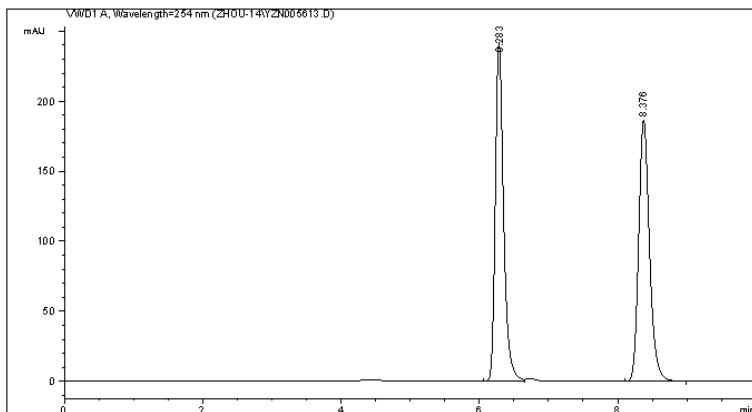

=====  
 Area Percent Report  
 =====

Sorted By : Signal  
 Multiplier: : 1.0000  
 Dilution: : 1.0000  
 Use Multiplier & Dilution Factor with ISTDs

Signal 1: VWD1 A, Wavelength=254 nm

| Peak # | RetTime [min] | Type | Width [min] | Area mAU *s | Height [mAU] | Area %  |
|--------|---------------|------|-------------|-------------|--------------|---------|
| 1      | 6.283         | VV   | 0.1266      | 2018.98083  | 241.69243    | 49.8280 |
| 2      | 8.376         | BB   | 0.1665      | 2032.91565  | 186.51620    | 50.1720 |

Totals : 4051.89648 428.20863

=====  
 \*\*\* End of Report \*\*\*

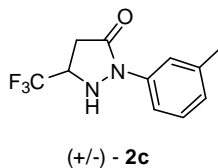

Data File C:\CHEM32\1\DATA\ZH00-14\YZN005601.D  
 Sample Name: ZC-5-81B

=====  
 Acq. Operator : Z  
 Acq. Instrument : Instrument 1 Location : Vial 1  
 Injection Date : 7/21/2014 11:03:23 AM  
 Acq. Method : C:\CHEM32\1\METHODS\DEF LC.M  
 Last changed : 7/21/2014 11:01:34 AM by Z  
 (modified after loading)  
 Analysis Method : C:\CHEM32\1\METHODS\DEF LC.M  
 Last changed : 12/8/2014 9:00:48 AM by Z  
 (modified after loading)  
 Sample Info : AD-H , H/1-PrOH = 70/30, 0.7 mL/min, 30 oC, 254 nm

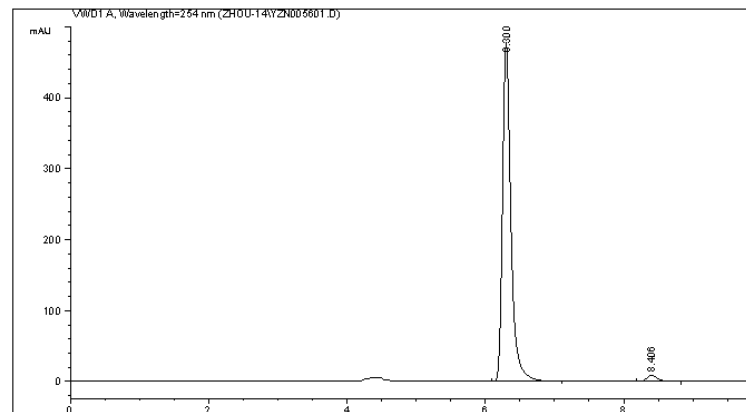

=====  
 Area Percent Report  
 =====

Sorted By : Signal  
 Multiplier: : 1.0000  
 Dilution: : 1.0000  
 Use Multiplier & Dilution Factor with ISTDs

Signal 1: VWD1 A, Wavelength=254 nm

| Peak # | RetTime [min] | Type | Width [min] | Area mAU *s | Height [mAU] | Area %  |
|--------|---------------|------|-------------|-------------|--------------|---------|
| 1      | 6.300         | BB   | 0.1267      | 4052.55566  | 477.21707    | 97.6812 |
| 2      | 8.406         | BB   | 0.1666      | 96.20064    | 8.81815      | 2.3188  |

Totals : 4148.75630 486.03522

=====  
 \*\*\* End of Report \*\*\*

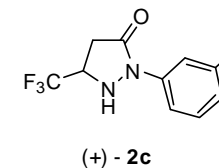

Data File C:\CHEM32\1\DATA\ZH00-14\YZN005615.D  
 Sample Name: ZC-5-81C+-

```

=====
Acq. Operator   : Z
Acq. Instrument : Instrument 1          Location : Vial 1
Injection Date  : 7/21/2014 4:51:12 PM
Acq. Method     : C:\CHEM32\1\METHODS\DEF LC.M
Last changed    : 7/21/2014 4:50:42 PM by Z
                  (modified after loading)
Analysis Method : C:\CHEM32\1\METHODS\DEF LC.M
Last changed    : 12/8/2014 9:00:48 AM by Z
                  (modified after loading)
Sample Info     : AD-H , H/1-PrOH = 70/30, 0.7 mL/min, 30 oC, 254 nm
=====
  
```

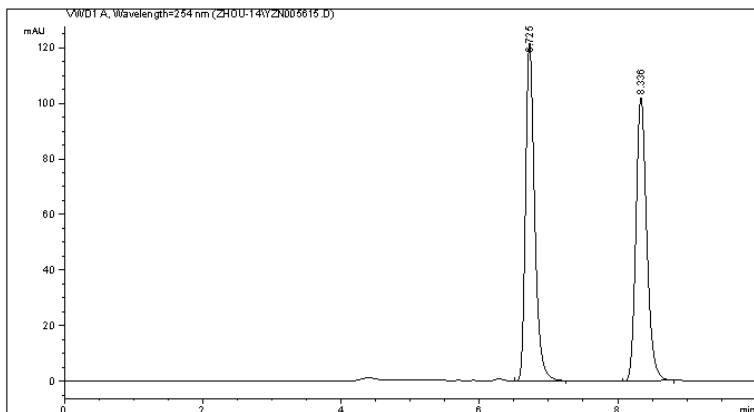

Area Percent Report

```

Sorted By      :      Signal
Multiplier:    :      1.0000
Dilution:      :      1.0000
Use Multiplier & Dilution Factor with ISTDs
  
```

Signal 1: VWD1 A, Wavelength=254 nm

| Peak # | RetTime [min] | Type | Width [min] | Area mAU *s | Height [mAU] | Area %  |
|--------|---------------|------|-------------|-------------|--------------|---------|
| 1      | 6.725         | VB   | 0.1389      | 1113.86377  | 121.64944    | 50.1462 |
| 2      | 8.336         | BB   | 0.1676      | 1107.36755  | 101.84657    | 49.8538 |

Totals : 2221.23132 223.49602

\*\*\* End of Report \*\*\*

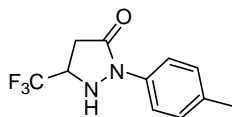

(+/-) - 2d

Data File C:\CHEM32\1\DATA\ZH00-14\YZN005607.D  
 Sample Name: ZC-5-81C

```

=====
Acq. Operator   : Z
Acq. Instrument : Instrument 1          Location : Vial 1
Injection Date  : 7/21/2014 2:46:54 PM
Acq. Method     : C:\CHEM32\1\METHODS\DEF LC.M
Last changed    : 7/21/2014 2:46:29 PM by Z
                  (modified after loading)
Analysis Method : C:\CHEM32\1\METHODS\DEF LC.M
Last changed    : 12/8/2014 9:00:48 AM by Z
                  (modified after loading)
Sample Info     : AD-H , H/1-PrOH = 70/30, 0.7 mL/min, 30 oC, 254 nm
=====
  
```

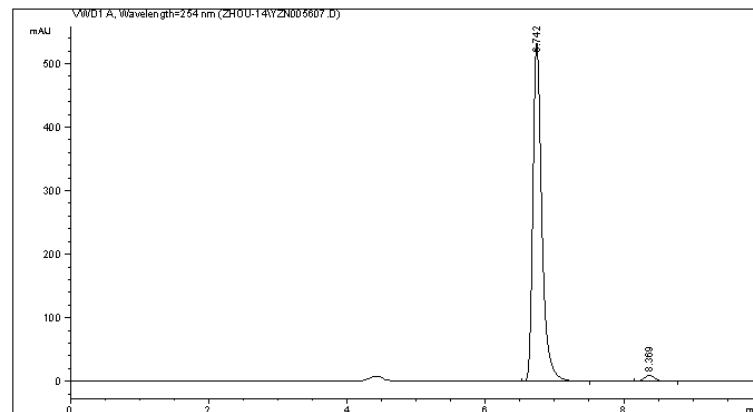

Area Percent Report

```

Sorted By      :      Signal
Multiplier:    :      1.0000
Dilution:      :      1.0000
Use Multiplier & Dilution Factor with ISTDs
  
```

Signal 1: VWD1 A, Wavelength=254 nm

| Peak # | RetTime [min] | Type | Width [min] | Area mAU *s | Height [mAU] | Area %  |
|--------|---------------|------|-------------|-------------|--------------|---------|
| 1      | 6.742         | VB   | 0.1359      | 4811.26807  | 532.89709    | 97.8408 |
| 2      | 8.369         | BB   | 0.1648      | 106.17783   | 9.87357      | 2.1592  |

Totals : 4917.44589 542.77066

\*\*\* End of Report \*\*\*

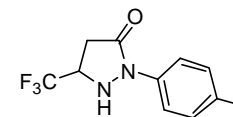

(+) - 2d

Data File C:\CHEM32\1\DATA\ZH00-14\YZN005610.D  
 Sample Name: ZC-5-81E+-

=====  
 Acq. Operator : Z  
 Acq. Instrument : Instrument 1 Location : Vial 1  
 Injection Date : 7/21/2014 3:43:30 PM  
 Acq. Method : C:\CHEM32\1\METHODS\DEF LC.M  
 Last changed : 7/21/2014 3:27:19 PM by Z  
 (modified after loading)  
 Analysis Method : C:\CHEM32\1\METHODS\DEF LC.M  
 Last changed : 12/8/2014 9:00:48 AM by Z  
 (modified after loading)  
 Sample Info : AD-H , H/1-PrOH = 70/30, 0.7 mL/min, 30 oC, 254 nm

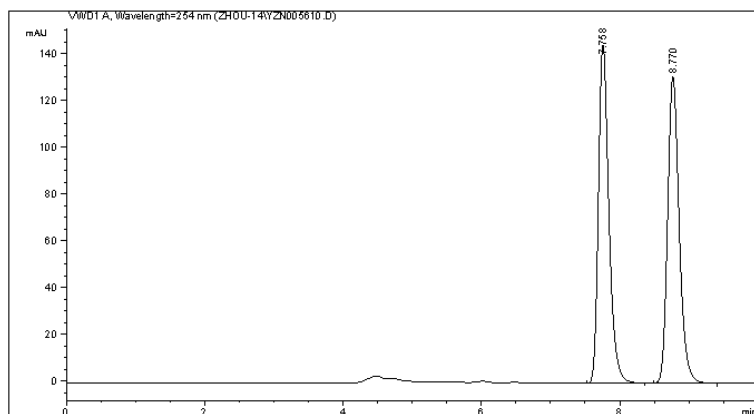

=====  
 Area Percent Report  
 =====

Sorted By : Signal  
 Multiplier: : 1.0000  
 Dilution: : 1.0000  
 Use Multiplier & Dilution Factor with ISTDs

Signal 1: VWD1 A, Wavelength=254 nm

| Peak # | RetTime [min] | Type | Width [min] | Area mAU   | Height %s | Area [mAU] | Area % |
|--------|---------------|------|-------------|------------|-----------|------------|--------|
| 1      | 7.758         | BB   | 0.1603      | 1518.44153 | 144.70284 | 49.9998    |        |
| 2      | 8.770         | BB   | 0.1773      | 1518.45313 | 131.11829 | 50.0002    |        |

Totals : 3036.89465 275.82112

=====  
 \*\*\* End of Report \*\*\*

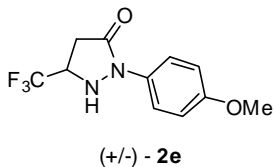

Data File C:\CHEM32\1\DATA\ZH00-14\YZN005611.D  
 Sample Name: ZC-5-81E

=====  
 Acq. Operator : Z  
 Acq. Instrument : Instrument 1 Location : Vial 1  
 Injection Date : 7/21/2014 3:56:37 PM  
 Acq. Method : C:\CHEM32\1\METHODS\DEF LC.M  
 Last changed : 7/21/2014 3:56:12 PM by Z  
 (modified after loading)  
 Analysis Method : C:\CHEM32\1\METHODS\DEF LC.M  
 Last changed : 12/8/2014 9:00:48 AM by Z  
 (modified after loading)  
 Sample Info : AD-H , H/1-PrOH = 70/30, 0.7 mL/min, 30 oC, 254 nm

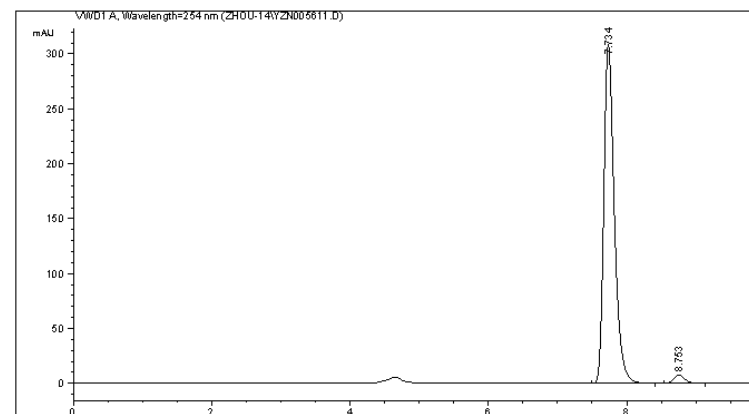

=====  
 Area Percent Report  
 =====

Sorted By : Signal  
 Multiplier: : 1.0000  
 Dilution: : 1.0000  
 Use Multiplier & Dilution Factor with ISTDs

Signal 1: VWD1 A, Wavelength=254 nm

| Peak # | RetTime [min] | Type | Width [min] | Area mAU   | Height %s | Area [mAU] | Area % |
|--------|---------------|------|-------------|------------|-----------|------------|--------|
| 1      | 7.734         | BB   | 0.1609      | 3253.38062 | 308.39325 | 97.3675    |        |
| 2      | 8.753         | BB   | 0.1762      | 87.96004   | 7.66204   | 2.6325     |        |

Totals : 3341.34066 316.0529

=====  
 \*\*\* End of Report \*\*\*

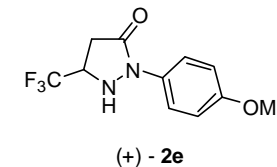

Data File C:\CHEM32\1\DATA\ZHOU-14\YZN005608.D  
 Sample Name: ZC-5-81D+-

=====  
 Acq. Operator : Z  
 Acq. Instrument : Instrument 1 Location : Vial 1  
 Injection Date : 7/21/2014 2:59:21 PM  
 Acq. Method : C:\CHEM32\1\METHODS\DEF LC.M  
 Last changed : 7/21/2014 2:57:35 PM by Z  
 (modified after loading)  
 Analysis Method : C:\CHEM32\1\METHODS\DEF LC.M  
 Last changed : 12/8/2014 9:00:48 AM by Z  
 (modified after loading)  
 Sample Info : AD-H , H/1-PrOH = 70/30, 0.7 mL/min, 30 oC, 254 nm

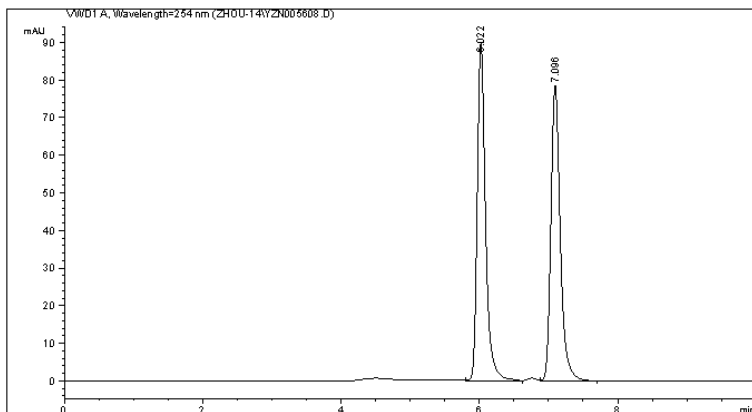

=====  
 Area Percent Report  
 =====

Sorted By : Signal  
 Multiplier: : 1.0000  
 Dilution: : 1.0000  
 Use Multiplier & Dilution Factor with ISTDs

Signal 1: VWD1 A, Wavelength=254 nm

| Peak # | RetTime [min] | Type | Width [min] | Area mAU *s | Height [mAU] | Area %  |
|--------|---------------|------|-------------|-------------|--------------|---------|
| 1      | 6.022         | VB   | 0.1267      | 753.17029   | 90.01208     | 50.3189 |
| 2      | 7.096         | VB   | 0.1438      | 743.62482   | 78.66964     | 49.6811 |

Totals : 1496.79510 168.68172

=====  
 \*\*\* End of Report \*\*\*

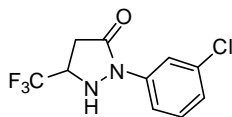

(+/-) - 2f

Data File C:\CHEM32\1\DATA\ZHOU-14\YZN005609.D  
 Sample Name: ZC-5-81D

=====  
 Acq. Operator : Z  
 Acq. Instrument : Instrument 1 Location : Vial 1  
 Injection Date : 7/21/2014 3:15:15 PM  
 Acq. Method : C:\CHEM32\1\METHODS\DEF LC.M  
 Last changed : 7/21/2014 3:13:39 PM by Z  
 (modified after loading)  
 Analysis Method : C:\CHEM32\1\METHODS\DEF LC.M  
 Last changed : 12/8/2014 9:00:48 AM by Z  
 (modified after loading)  
 Sample Info : AD-H , H/1-PrOH = 70/30, 0.7 mL/min, 30 oC, 254 nm

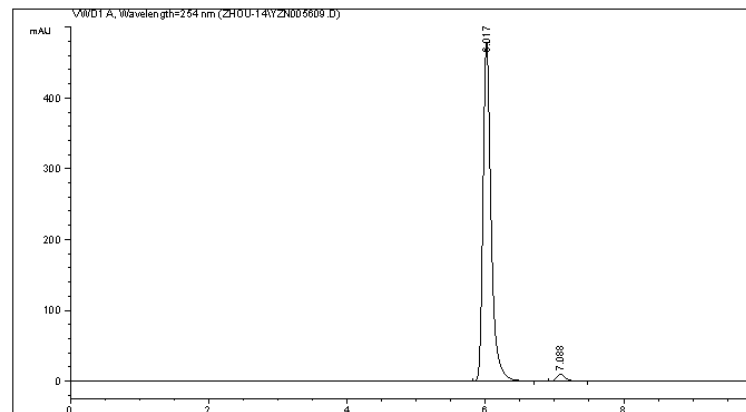

=====  
 Area Percent Report  
 =====

Sorted By : Signal  
 Multiplier: : 1.0000  
 Dilution: : 1.0000  
 Use Multiplier & Dilution Factor with ISTDs

Signal 1: VWD1 A, Wavelength=254 nm

| Peak # | RetTime [min] | Type | Width [min] | Area mAU *s | Height [mAU] | Area %  |
|--------|---------------|------|-------------|-------------|--------------|---------|
| 1      | 6.017         | BB   | 0.1230      | 3910.24976  | 478.38824    | 97.6016 |
| 2      | 7.088         | BB   | 0.1410      | 96.08696    | 10.42237     | 2.3984  |

Totals : 4006.33672 488.81061

=====  
 \*\*\* End of Report \*\*\*

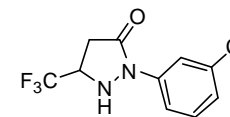

(+) - 2f

Data File C:\CHEM32\1\DATA\ZH00-14\YZN005675.D  
 Sample Name: ZC-5-83D+-

=====  
 Acq. Operator : Z  
 Acq. Instrument : Instrument 1 Location : Vial 1  
 Injection Date : 7/24/2014 4:27:01 PM  
 Acq. Method : C:\CHEM32\1\METHODS\DEF LC.M  
 Last changed : 7/24/2014 4:26:00 PM by Z  
 (modified after loading)  
 Analysis Method : C:\CHEM32\1\METHODS\DEF LC.M  
 Last changed : 12/8/2014 9:08:01 AM by Z  
 (modified after loading)  
 Sample Info : AD-H , H/1-PrOH = 85/15, 0.70 mL/min, 30 oC, 254 nm

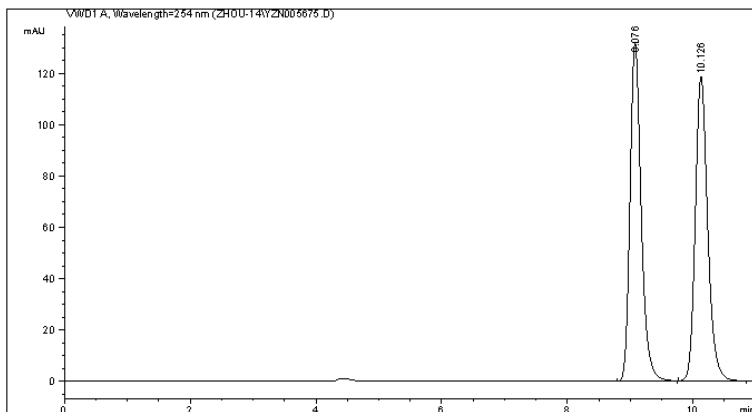

=====  
 Area Percent Report  
 =====

Sorted By : Signal  
 Multiplier: : 1.0000  
 Dilution: : 1.0000  
 Use Multiplier & Dilution Factor with ISTDs

Signal 1: VWD1 A, Wavelength=254 nm

| Peak # | RetTime [min] | Type | Width [min] | Area mAU   | Height %s | Area %  |
|--------|---------------|------|-------------|------------|-----------|---------|
| 1      | 9.076         | BB   | 0.1892      | 1627.82117 | 131.78853 | 50.0202 |
| 2      | 10.126        | BB   | 0.2096      | 1626.50952 | 118.56556 | 49.9798 |

Totals : 3254.33069 250.35409

=====  
 \*\*\* End of Report \*\*\*

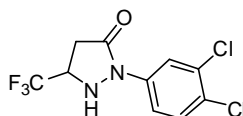

(+/-)-2g

Data File C:\CHEM32\1\DATA\ZH00-14\YZN005674.D  
 Sample Name: ZC-5-83D

=====  
 Acq. Operator : Z  
 Acq. Instrument : Instrument 1 Location : Vial 1  
 Injection Date : 7/24/2014 4:14:39 PM  
 Acq. Method : C:\CHEM32\1\METHODS\DEF LC.M  
 Last changed : 7/24/2014 4:13:02 PM by Z  
 (modified after loading)  
 Analysis Method : C:\CHEM32\1\METHODS\DEF LC.M  
 Last changed : 12/8/2014 9:08:01 AM by Z  
 (modified after loading)  
 Sample Info : AD-H , H/1-PrOH = 85/15, 0.70 mL/min, 30 oC, 254 nm

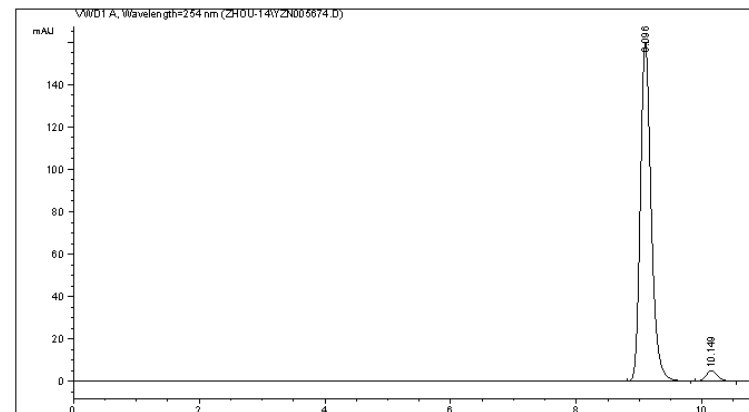

=====  
 Area Percent Report  
 =====

Sorted By : Signal  
 Multiplier: : 1.0000  
 Dilution: : 1.0000  
 Use Multiplier & Dilution Factor with ISTDs

Signal 1: VWD1 A, Wavelength=254 nm

| Peak # | RetTime [min] | Type | Width [min] | Area mAU   | Height %s | Area %  |
|--------|---------------|------|-------------|------------|-----------|---------|
| 1      | 9.096         | BB   | 0.1820      | 1912.09912 | 159.59459 | 96.6600 |
| 2      | 10.149        | BB   | 0.2020      | 66.07129   | 5.00566   | 3.3400  |

Totals : 1978.17041 164.60025

=====  
 \*\*\* End of Report \*\*\*

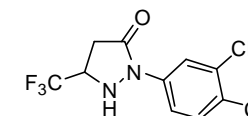

(+)-2g



Data File G:\HPLC FOR 1\83C\YZ006381.D  
 Sample Name: ZC-5-83C+-

=====  
 Acq. Operator : ZHOU  
 Acq. Instrument : Instrument 1 Location : Vial 1  
 Injection Date : 7/25/2014 7:27:38 AM  
 Acq. Method : C:\HPCHEM\1\METHODS\DEF LC1.M  
 Last changed : 7/25/2014 7:22:20 AM by ZHOU  
 (modified after loading)  
 Analysis Method : C:\CHEM32\1\METHODS\DEF LC.M  
 Last changed : 12/8/2014 9:17:59 AM by Z  
 (modified after loading)  
 Sample Info : 0J, H/i-PrOH = 70/30, 0.7 mL/min, 30 oC, 254 nm

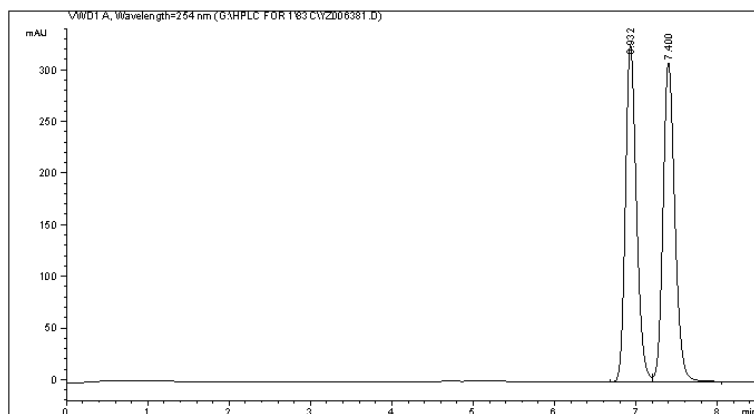

=====  
 Area Percent Report  
 =====

Sorted By : Signal  
 Multiplier: : 1.0000  
 Dilution: : 1.0000  
 Use Multiplier & Dilution Factor with ISTDs

Signal 1: VWD1 A, Wavelength=254 nm

| Peak # | RetTime [min] | Type | Width [min] | Area mAU   | Height %s | Area [mAU] | Area % |
|--------|---------------|------|-------------|------------|-----------|------------|--------|
| 1      | 6.932         | VV   | 0.1443      | 3059.86548 | 326.39697 | 49.7621    |        |
| 2      | 7.400         | VB   | 0.1530      | 3089.12012 | 309.18073 | 50.2379    |        |

Totals : 6148.98560 635.57770

=====  
 \*\*\* End of Report \*\*\*

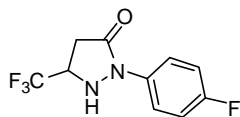

(+/-) - 2h

Data File G:\HPLC FOR 1\83C\YZ006382.D  
 Sample Name: ZC-5-83C

=====  
 Acq. Operator : ZHOU  
 Acq. Instrument : Instrument 1 Location : Vial 1  
 Injection Date : 7/25/2014 7:37:01 AM  
 Acq. Method : C:\HPCHEM\1\METHODS\DEF LC1.M  
 Last changed : 7/25/2014 7:36:48 AM by ZHOU  
 (modified after loading)  
 Analysis Method : C:\CHEM32\1\METHODS\DEF LC.M  
 Last changed : 12/8/2014 9:17:59 AM by Z  
 (modified after loading)  
 Sample Info : 0J, H/i-PrOH = 70/30, 0.7 mL/min, 30 oC, 254 nm

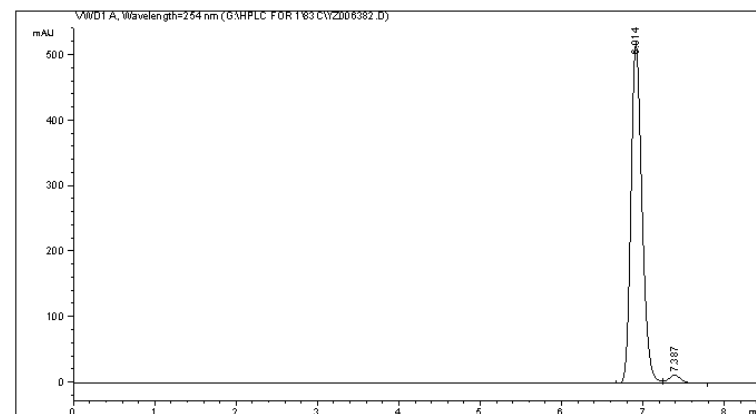

=====  
 Area Percent Report  
 =====

Sorted By : Signal  
 Multiplier: : 1.0000  
 Dilution: : 1.0000  
 Use Multiplier & Dilution Factor with ISTDs

Signal 1: VWD1 A, Wavelength=254 nm

| Peak # | RetTime [min] | Type | Width [min] | Area mAU   | Height %s | Area [mAU] | Area % |
|--------|---------------|------|-------------|------------|-----------|------------|--------|
| 1      | 6.914         | BV   | 0.1454      | 4895.64893 | 517.16840 | 97.3574    |        |
| 2      | 7.387         | VB   | 0.1619      | 132.88655  | 12.34933  | 2.6426     |        |

Totals : 5028.53548 529.51773

=====  
 \*\*\* End of Report \*\*\*

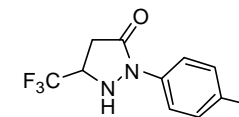

(+) - 2h

Data File C:\CHEM32\1\DATA\ZH0U-14\YZN005956.D  
 Sample Name: ZC-5-93A+-

```

=====
Acq. Operator   : Z
Acq. Instrument : Instrument 1          Location : Vial 1
Injection Date  : 9/1/2014 7:51:04 PM
Acq. Method     : C:\CHEM32\1\METHODS\DEF LC.M
Last changed    : 9/1/2014 7:44:40 PM by Z
                  (modified after loading)
Analysis Method : C:\CHEM32\1\METHODS\DEF LC.M
Last changed    : 12/8/2014 9:10:17 AM by Z
                  (modified after loading)
Sample Info     : AD-H, H/i-PrOH = 70/30, 0.7 mL/min, 30 oC, 254nm
  
```

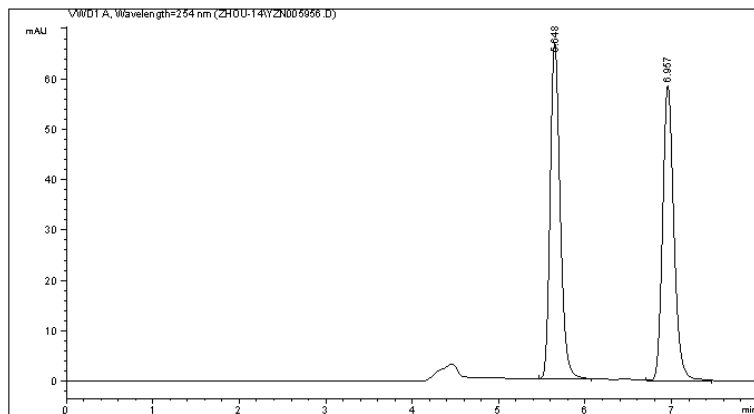

=====  
 Area Percent Report  
 =====

```

Sorted By      :      Signal
Multiplier:    :      1.0000
Dilution:      :      1.0000
Use Multiplier & Dilution Factor with ISTDs
  
```

Signal 1: VWD1 A, Wavelength=254 nm

| Peak # | RetTime [min] | Type | Width [min] | Area mAU *s | Height [mAU] | Area %  |
|--------|---------------|------|-------------|-------------|--------------|---------|
| 1      | 5.648         | BB   | 0.1229      | 535.93317   | 66.69895     | 50.2407 |
| 2      | 6.957         | VB   | 0.1393      | 530.79865   | 58.55206     | 49.7593 |

Totals : 1066.73181 125.25101

=====  
 \*\*\* End of Report \*\*\*

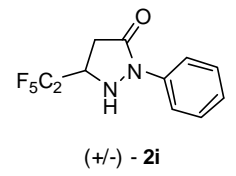

Data File C:\CHEM32\1\DATA\ZH0U-14\YZN005782.D  
 Sample Name: ZC-5-86A

```

=====
Acq. Operator   : Z
Acq. Instrument : Instrument 1          Location : Vial 1
Injection Date   : 7/31/2014 10:07:18 AM
Acq. Method      : C:\CHEM32\1\METHODS\DEF LC.M
Last changed     : 7/31/2014 10:06:36 AM by Z
                  (modified after loading)
Analysis Method  : C:\CHEM32\1\METHODS\DEF LC.M
Last changed     : 12/8/2014 9:10:17 AM by Z
                  (modified after loading)
Sample Info      : AD-H, H/i-PrOH = 70/30, 0.7 mL/min, 30 oC, 254 nm
  
```

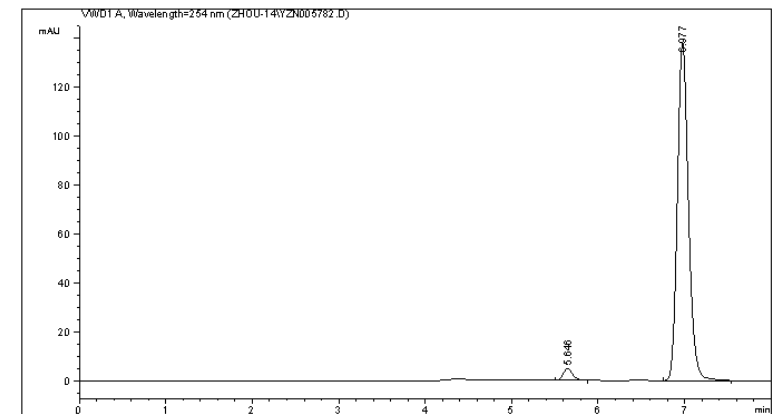

=====  
 Area Percent Report  
 =====

```

Sorted By      :      Signal
Multiplier:    :      1.0000
Dilution:      :      1.0000
Use Multiplier & Dilution Factor with ISTDs
  
```

Signal 1: VWD1 A, Wavelength=254 nm

| Peak # | RetTime [min] | Type | Width [min] | Area mAU *s | Height [mAU] | Area %  |
|--------|---------------|------|-------------|-------------|--------------|---------|
| 1      | 5.646         | BB   | 0.1148      | 36.22553    | 4.84819      | 2.8665  |
| 2      | 6.977         | BB   | 0.1358      | 1227.51172  | 137.97807    | 97.1335 |

Totals : 1263.73725 142.82626

=====  
 \*\*\* End of Report \*\*\*

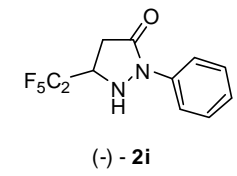

Data File C:\CHEM32\1\DATA\ZH00-14\YZN005910.D  
 Sample Name: ZC-5-93B+-

```

=====
Acq. Operator   : Z
Acq. Instrument : Instrument 1          Location : Vial 1
Injection Date  : 8/26/2014 2:48:41 PM
Acq. Method     : C:\CHEM32\1\METHODS\DEF LC.M
Last changed    : 8/26/2014 2:47:22 PM by Z
                  (modified after loading)
Analysis Method : C:\CHEM32\1\METHODS\DEF LC.M
Last changed    : 12/8/2014 9:12:05 AM by Z
                  (modified after loading)
Sample Info     : 0G-H, H/i-PrOH = 90/10, 0.7 mL/min, 30 oC, 254nm
  
```

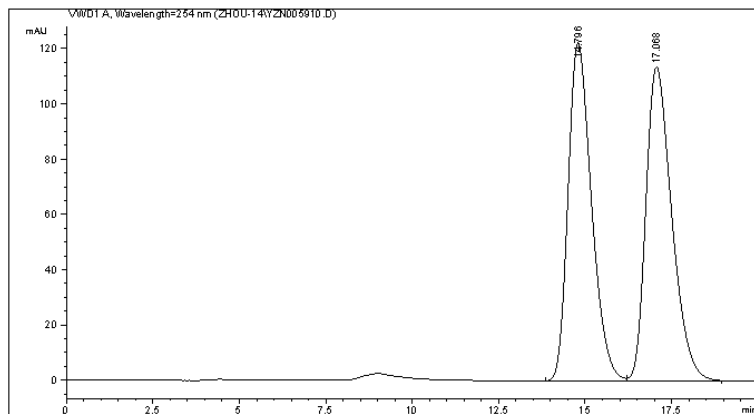

Area Percent Report

```

Sorted By      :      Signal
Multiplier:    :      1.0000
Dilution:      :      1.0000
Use Multiplier & Dilution Factor with ISTDs
  
```

Signal 1: VWD1 A, Wavelength=254 nm

| Peak # | RetTime [min] | Type | Width [min] | Area mAU *s | Height [mAU] | Area %  |
|--------|---------------|------|-------------|-------------|--------------|---------|
| 1      | 14.796        | BB   | 0.7202      | 5749.26123  | 122.31118    | 49.3583 |
| 2      | 17.068        | BB   | 0.7968      | 5898.76172  | 113.55722    | 50.6417 |

Totals : 1.16480e4 235.86840

\*\*\* End of Report \*\*\*

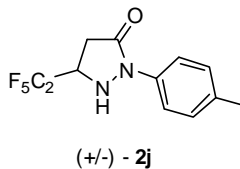

Data File C:\CHEM32\1\DATA\ZH00-14\YZN005911.D  
 Sample Name: ZC-5-93B

```

=====
Acq. Operator   : Z
Acq. Instrument : Instrument 1          Location : Vial 1
Injection Date   : 8/26/2014 3:09:53 PM
Acq. Method     : C:\CHEM32\1\METHODS\DEF LC.M
Last changed    : 8/26/2014 3:09:15 PM by Z
                  (modified after loading)
Analysis Method : C:\CHEM32\1\METHODS\DEF LC.M
Last changed    : 12/8/2014 9:12:05 AM by Z
                  (modified after loading)
Sample Info     : 0G-H, H/i-PrOH = 90/10, 0.7 mL/min, 30 oC, 254nm
  
```

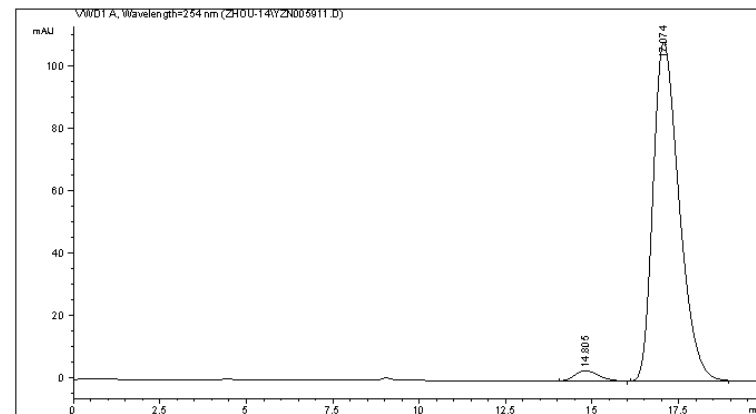

Area Percent Report

```

Sorted By      :      Signal
Multiplier:    :      1.0000
Dilution:      :      1.0000
Use Multiplier & Dilution Factor with ISTDs
  
```

Signal 1: VWD1 A, Wavelength=254 nm

| Peak # | RetTime [min] | Type | Width [min] | Area mAU *s | Height [mAU] | Area %  |
|--------|---------------|------|-------------|-------------|--------------|---------|
| 1      | 14.805        | BB   | 0.6674      | 156.58360   | 3.36045      | 2.6821  |
| 2      | 17.074        | BB   | 0.8038      | 5681.59717  | 108.37350    | 97.3179 |

Totals : 5838.18077 111.73394

\*\*\* End of Report \*\*\*

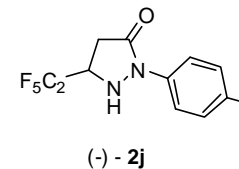

Data File C:\CHEM32\1\DATA\ZH00-14\YZN005772.D  
 Sample Name: ZC-5-86F+-

=====  
 Acq. Operator : Z  
 Acq. Instrument : Instrument 1 Location : Vial 1  
 Injection Date : 7/30/2014 10:01:31 AM  
 Acq. Method : C:\CHEM32\1\METHODS\DEF LC.M  
 Last changed : 7/30/2014 9:59:11 AM by Z  
 (modified after loading)  
 Analysis Method : C:\CHEM32\1\METHODS\DEF LC.M  
 Last changed : 12/4/2014 9:39:58 PM by Z  
 (modified after loading)  
 Sample Info : AD-H , H/1-PrOH = 70/30 0.7 mL/min, 30 oC, 254 nm

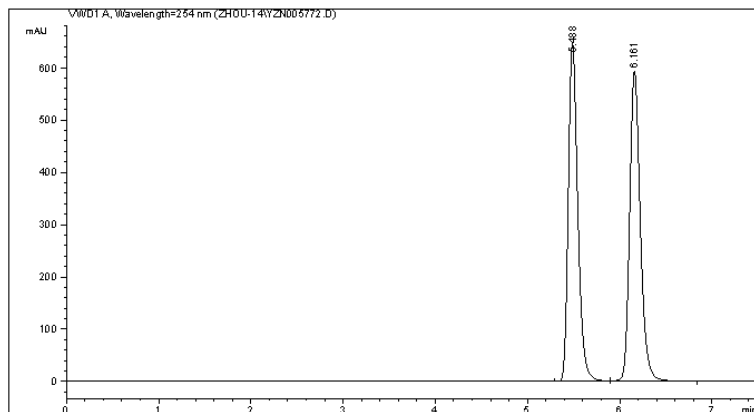

=====  
 Area Percent Report  
 =====

Sorted By : Signal  
 Multiplier: : 1.0000  
 Dilution: : 1.0000  
 Use Multiplier & Dilution Factor with ISTDs

Signal 1: VWD1 A, Wavelength=254 nm

| Peak # | RetTime [min] | Type | Width [min] | Area mAU   | Height %s | Area %  |
|--------|---------------|------|-------------|------------|-----------|---------|
| 1      | 5.488         | BV   | 0.1095      | 4623.56934 | 647.60217 | 49.2684 |
| 2      | 6.161         | VB   | 0.1228      | 4760.87842 | 593.07776 | 50.7316 |

Totals : 9384.44775 1240.67993

=====  
 \*\*\* End of Report \*\*\*

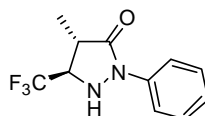

(+/-) - 4a

Data File C:\CHEM32\1\DATA\ZH00-14\YZN005773.D  
 Sample Name: ZC-5-86F

=====  
 Acq. Operator : Z  
 Acq. Instrument : Instrument 1 Location : Vial 1  
 Injection Date : 7/30/2014 10:16:46 AM  
 Acq. Method : C:\CHEM32\1\METHODS\DEF LC.M  
 Last changed : 7/30/2014 10:15:44 AM by Z  
 (modified after loading)  
 Analysis Method : C:\CHEM32\1\METHODS\DEF LC.M  
 Last changed : 12/4/2014 9:39:58 PM by Z  
 (modified after loading)  
 Sample Info : AD-H , H/1-PrOH = 70/30 0.7 mL/min, 30 oC, 254 nm

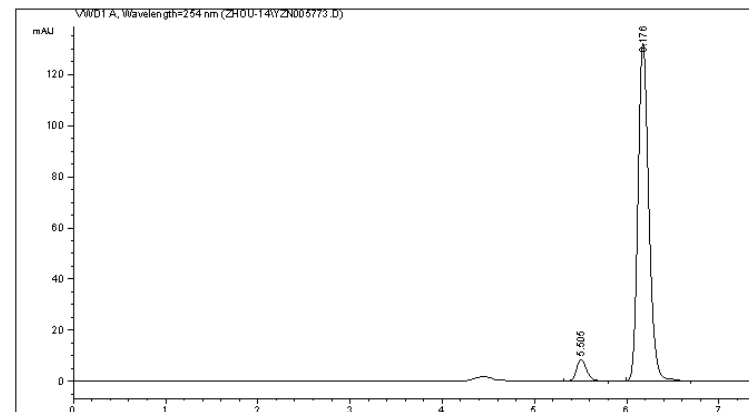

=====  
 Area Percent Report  
 =====

Sorted By : Signal  
 Multiplier: : 1.0000  
 Dilution: : 1.0000  
 Use Multiplier & Dilution Factor with ISTDs

Signal 1: VWD1 A, Wavelength=254 nm

| Peak # | RetTime [min] | Type | Width [min] | Area mAU   | Height %s | Area %  |
|--------|---------------|------|-------------|------------|-----------|---------|
| 1      | 5.505         | BB   | 0.1176      | 63.91172   | 8.43166   | 5.6200  |
| 2      | 6.176         | BB   | 0.1238      | 1073.29895 | 132.26836 | 94.3800 |

Totals : 1137.21067 140.70002

=====  
 \*\*\* End of Report \*\*\*

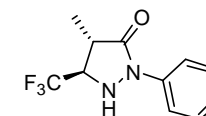

(-) - 4a

Data File C:\CHEM32\1\DATA\ZH00-14\YZN005713.D  
 Sample Name: ZC-5-86A+-

```

=====
Acq. Operator   : Z
Acq. Instrument : Instrument 1          Location : Vial 1
Injection Date  : 7/26/2014 10:30:10 AM
Acq. Method     : C:\CHEM32\1\METHODS\DEF LC.M
Last changed    : 7/26/2014 10:10:25 AM by Z
                  (modified after loading)
Analysis Method : C:\CHEM32\1\METHODS\DEF LC.M
Last changed    : 12/4/2014 9:34:10 PM by Z
                  (modified after loading)
Sample Info     : AD-H , H/1-PrOH = 70/30, 0.7 mL/min, 30 oC, 254 nm
=====
  
```

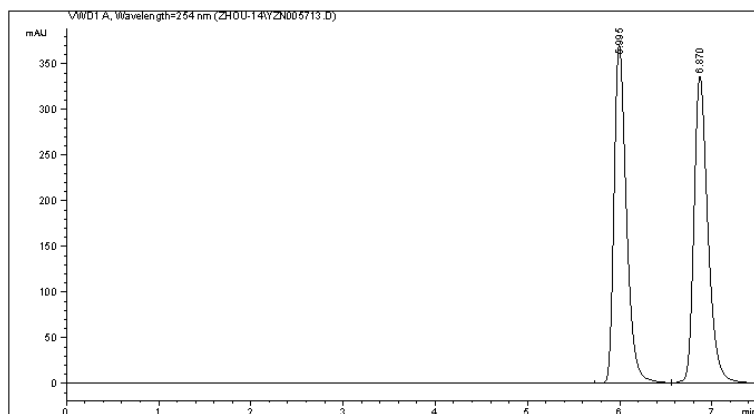

Area Percent Report

```

Sorted By      :      Signal
Multiplier:    :      1.0000
Dilution:      :      1.0000
Use Multiplier & Dilution Factor with ISTDs
  
```

Signal 1: VWD1 A, Wavelength=254 nm

| Peak # | RetTime [min] | Type | Width [min] | Area [mAU*s] | Height [mAU] | Area %  |
|--------|---------------|------|-------------|--------------|--------------|---------|
| 1      | 5.995         | VV   | 0.1421      | 3450.47607   | 370.58310    | 49.4396 |
| 2      | 6.870         | VB   | 0.1604      | 3528.69922   | 335.83157    | 50.5604 |

Totals : 6979.17529 706.41467

\*\*\* End of Report \*\*\*

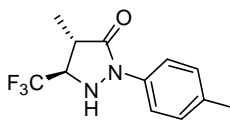

(+/-) -4b

Data File C:\CHEM32\1\DATA\ZH00-14\YZN005714.D  
 Sample Name: ZC-5-86A

```

=====
Acq. Operator   : Z
Acq. Instrument : Instrument 1          Location : Vial 1
Injection Date   : 7/26/2014 10:42:42 AM
Acq. Method     : C:\CHEM32\1\METHODS\DEF LC.M
Last changed    : 7/26/2014 10:40:52 AM by Z
                  (modified after loading)
Analysis Method : C:\CHEM32\1\METHODS\DEF LC.M
Last changed    : 12/4/2014 9:34:10 PM by Z
                  (modified after loading)
Sample Info     : AD-H , H/1-PrOH = 70/30, 0.7 mL/min, 30 oC, 254 nm
=====
  
```

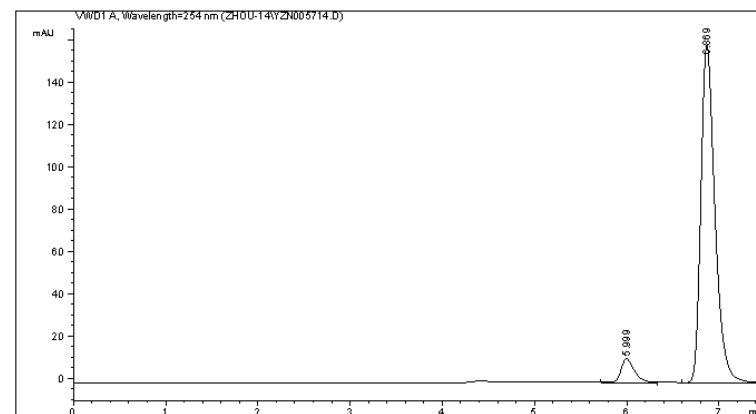

Area Percent Report

```

Sorted By      :      Signal
Multiplier:    :      1.0000
Dilution:      :      1.0000
Use Multiplier & Dilution Factor with ISTDs
  
```

Signal 1: VWD1 A, Wavelength=254 nm

| Peak # | RetTime [min] | Type | Width [min] | Area [mAU*s] | Height [mAU] | Area %  |
|--------|---------------|------|-------------|--------------|--------------|---------|
| 1      | 5.999         | VV   | 0.1505      | 112.12787    | 11.18441     | 6.2387  |
| 2      | 6.869         | VB   | 0.1610      | 1685.17603   | 159.63228    | 93.7613 |

Totals : 1797.30389 170.81669

\*\*\* End of Report \*\*\*

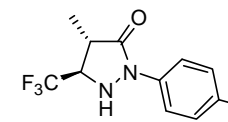

(-) -4b

Data File C:\CHEM32\1\DATA\ZH00-14\YZN005775.D  
 Sample Name: ZC-5-86E+-

```

=====
Acq. Operator   : Z
Acq. Instrument : Instrument 1          Location : Vial 1
Injection Date  : 7/30/2014 11:12:11 AM
Acq. Method     : C:\CHEM32\1\METHODS\DEF LC.M
Last changed    : 7/30/2014 10:47:53 AM by Z
                  (modified after loading)
Analysis Method : C:\CHEM32\1\METHODS\DEF LC.M
Last changed    : 12/4/2014 9:39:58 PM by Z
                  (modified after loading)
Sample Info     : AD-H , H/i-PrOH = 70/30 0.7 mL/min, 30 oC, 254 nm
=====
  
```

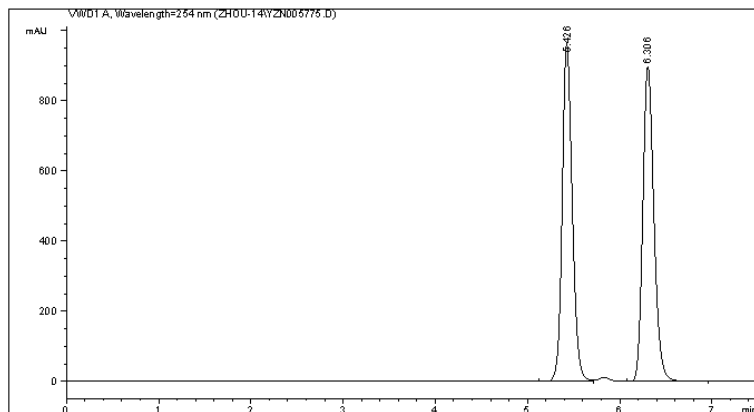

Area Percent Report

```

Sorted By      :      Signal
Multiplier:    :      1.0000
Dilution:      :      1.0000
Use Multiplier & Dilution Factor with ISTDs
  
```

Signal 1: VWD1 A, Wavelength=254 nm

| Peak # | RetTime [min] | Type | Width [min] | Area mAU   | Height %s | Area [mAU] | Area % |
|--------|---------------|------|-------------|------------|-----------|------------|--------|
| 1      | 5.426         | VV   | 0.1156      | 7279.71191 | 965.33405 | 49.1759    |        |
| 2      | 6.306         | VB   | 0.1297      | 7523.69189 | 898.46832 | 50.8241    |        |

Totals : 1.48034e4 1863.80237

\*\*\* End of Report \*\*\*

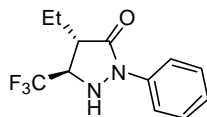

(+/-)-4c

Data File C:\CHEM32\1\DATA\ZH00-14\YZN005808.D  
 Sample Name: ZC-5-87E

```

=====
Acq. Operator   : Z
Acq. Instrument : Instrument 1          Location : Vial 1
Injection Date  : 8/14/2014 1:45:06 PM
Acq. Method     : C:\CHEM32\1\METHODS\DEF LC.M
Last changed    : 8/14/2014 1:26:59 PM by Z
                  (modified after loading)
Analysis Method : C:\CHEM32\1\METHODS\DEF LC.M
Last changed    : 12/4/2014 9:39:58 PM by Z
                  (modified after loading)
Sample Info     : AD, H/i-PrOH = 70/30, 0.7 mL/min, 30 oC, 254 nm
=====
  
```

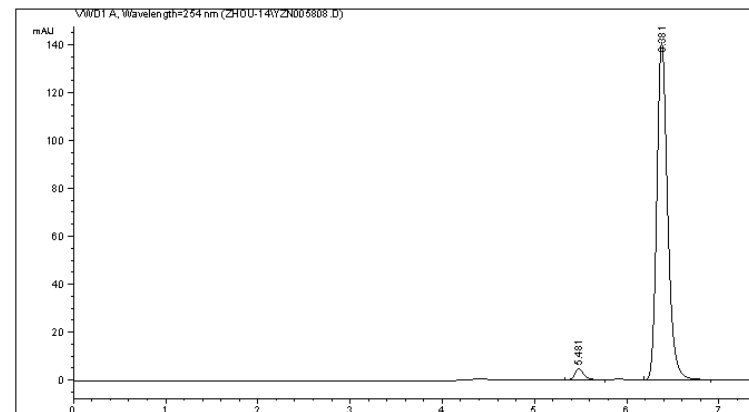

Area Percent Report

```

Sorted By      :      Signal
Multiplier:    :      1.0000
Dilution:      :      1.0000
Use Multiplier & Dilution Factor with ISTDs
  
```

Signal 1: VWD1 A, Wavelength=254 nm

| Peak # | RetTime [min] | Type | Width [min] | Area mAU   | Height %s | Area [mAU] | Area % |
|--------|---------------|------|-------------|------------|-----------|------------|--------|
| 1      | 5.481         | BB   | 0.1068      | 33.74635   | 4.71308   | 2.8550     |        |
| 2      | 6.381         | BB   | 0.1243      | 1148.25696 | 140.71727 | 97.1450    |        |

Totals : 1182.00331 145.43035

\*\*\* End of Report \*\*\*

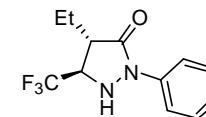

(-)-4c

Data File C:\CHEM32\1\DATA\ZH00-14\YZN005841.D  
 Sample Name: ZC-5-90A+-

```

=====
Acq. Operator   : Z
Acq. Instrument : Instrument 1          Location : Vial 1
Injection Date  : 8/15/2014 9:08:59 PM
Acq. Method     : C:\CHEM32\1\METHODS\DEF LC.M
Last changed    : 8/15/2014 9:06:53 PM by Z
                  (modified after loading)
Analysis Method : C:\CHEM32\1\METHODS\DEF LC.M
Last changed    : 12/20/2014 10:57:17 AM by Z
                  (modified after loading)
Sample Info     : 0G-H, H/i-PrOH = 95/5, 0.7 mL/min, 30 oC, 254 nm
=====
  
```

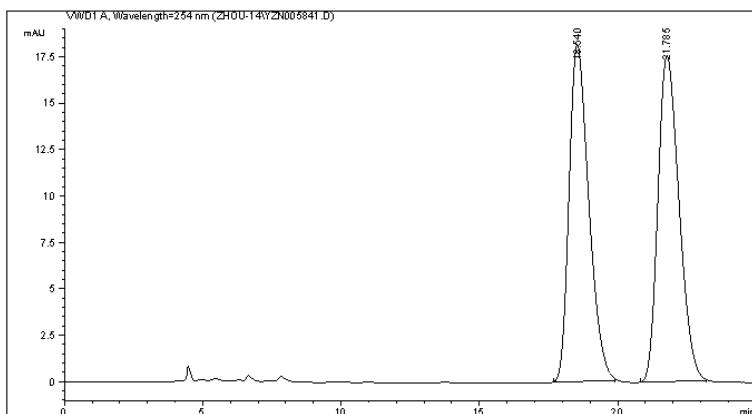

Area Percent Report

```

Sorted By      : Signal
Multiplier:    : 1.0000
Dilution:      : 1.0000
Use Multiplier & Dilution Factor with ISTDs
  
```

Signal 1: VWD1 A, Wavelength=254 nm

| Peak # | RetTime [min] | Type | Width [min] | Area [mAU*s] | Height [mAU] | Area %  |
|--------|---------------|------|-------------|--------------|--------------|---------|
| 1      | 18.540        | BB   | 0.7551      | 897.38940    | 18.13141     | 49.1149 |
| 2      | 21.785        | BB   | 0.8105      | 929.73413    | 17.54202     | 50.8851 |

Totals : 1827.12354 35.67343

\*\*\* End of Report \*\*\*

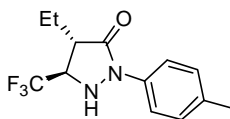

(+/-)-4d

Data File C:\CHEM32\1\DATA\ZH00-14\YZN005842.D  
 Sample Name: ZC-5-90A

```

=====
Acq. Operator   : Z
Acq. Instrument : Instrument 1          Location : Vial 1
Injection Date  : 8/15/2014 9:49:35 PM
Acq. Method     : C:\CHEM32\1\METHODS\DEF LC.M
Last changed    : 8/15/2014 9:36:53 PM by Z
                  (modified after loading)
Analysis Method : C:\CHEM32\1\METHODS\DEF LC.M
Last changed    : 12/20/2014 10:58:16 AM by Z
                  (modified after loading)
Sample Info     : 0G-H, H/i-PrOH = 95/5, 0.7 mL/min, 30 oC, 254 nm
=====
  
```

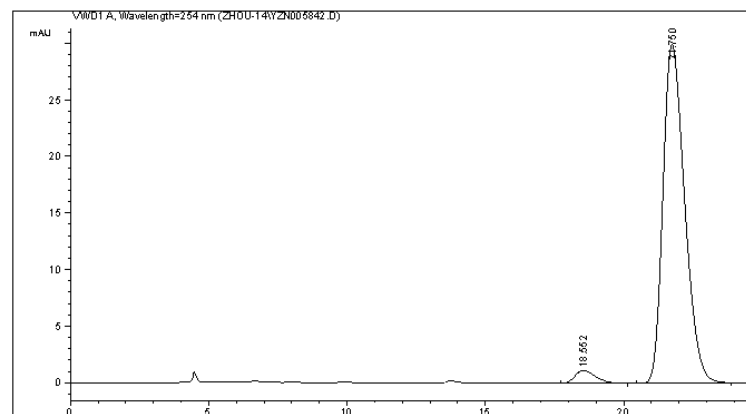

Area Percent Report

```

Sorted By      : Signal
Multiplier:    : 1.0000
Dilution:      : 1.0000
Use Multiplier & Dilution Factor with ISTDs
  
```

Signal 1: VWD1 A, Wavelength=254 nm

| Peak # | RetTime [min] | Type | Width [min] | Area [mAU*s] | Height [mAU] | Area %  |
|--------|---------------|------|-------------|--------------|--------------|---------|
| 1      | 18.552        | BB   | 0.7550      | 60.09979     | 1.16728      | 3.5548  |
| 2      | 21.750        | BB   | 0.8428      | 1630.55042   | 29.90775     | 96.4452 |

Totals : 1690.65020 31.07504

\*\*\* End of Report \*\*\*

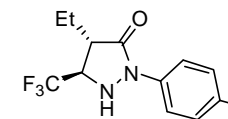

(+)-4d

Data File C:\CHEM32\1\DATA\ZH00-14\YZN006631.D  
 Sample Name: ZC-5-90B+-

=====  
 Acq. Operator : Z  
 Acq. Instrument : Instrument 1 Location : Vial 1  
 Injection Date : 12/13/2014 2:15:40 PM  
 Acq. Method : C:\CHEM32\1\METHODS\DEF LC.M  
 Last changed : 12/13/2014 1:45:53 PM by Z  
 (modified after loading)  
 Analysis Method : C:\CHEM32\1\METHODS\DEF LC.M  
 Last changed : 12/20/2014 10:55:06 AM by Z  
 (modified after loading)  
 Sample Info : AD-H, H/i-PrOH = 70/30, 0.7 mL/min, 30 oC, 254 nm

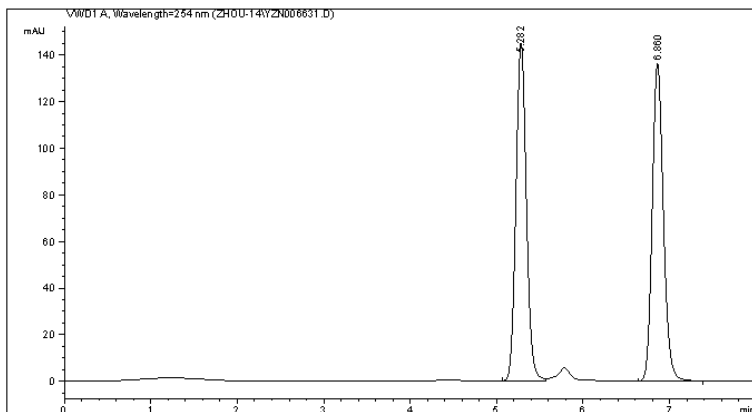

=====  
 Area Percent Report  
 =====

Sorted By : Signal  
 Multiplier: : 1.0000  
 Dilution: : 1.0000  
 Use Multiplier & Dilution Factor with ISTDs

Signal 1: VWD1 A, Wavelength=254 nm

| Peak # | RetTime [min] | Type | Width [min] | Area mAU*s | Height [mAU] | Area %  |
|--------|---------------|------|-------------|------------|--------------|---------|
| 1      | 5.282         | BV   | 0.1296      | 1212.78735 | 144.99921    | 49.8640 |
| 2      | 6.860         | BB   | 0.1380      | 1219.40527 | 136.18169    | 50.1360 |

Totals : 2432.19263 281.18089

=====  
 \*\*\* End of Report \*\*\*

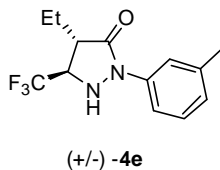

Data File C:\CHEM32\1\DATA\ZH00-14\YZN005827.D  
 Sample Name: ZC-5-90B

=====  
 Acq. Operator : Z  
 Acq. Instrument : Instrument 1 Location : Vial 1  
 Injection Date : 8/14/2014 9:16:36 PM  
 Acq. Method : C:\CHEM32\1\METHODS\DEF LC.M  
 Last changed : 8/14/2014 9:12:39 PM by Z  
 (modified after loading)  
 Analysis Method : C:\CHEM32\1\METHODS\DEF LC.M  
 Last changed : 12/4/2014 9:44:22 PM by Z  
 (modified after loading)  
 Sample Info : AD, H/i-PrOH = 70/30, 0.7 mL/min, 30 oC, 254 nm

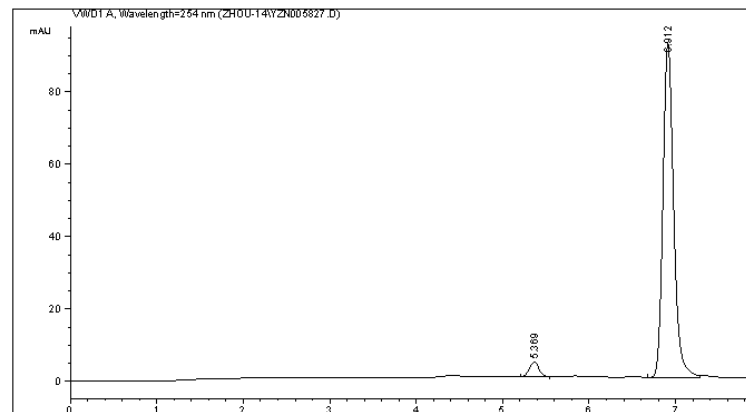

=====  
 Area Percent Report  
 =====

Sorted By : Signal  
 Multiplier: : 1.0000  
 Dilution: : 1.0000  
 Use Multiplier & Dilution Factor with ISTDs

Signal 1: VWD1 A, Wavelength=254 nm

| Peak # | RetTime [min] | Type | Width [min] | Area mAU*s | Height [mAU] | Area %  |
|--------|---------------|------|-------------|------------|--------------|---------|
| 1      | 5.369         | BV   | 0.1261      | 32.52824   | 4.09973      | 3.9345  |
| 2      | 6.912         | VV   | 0.1308      | 794.20612  | 92.47683     | 96.0655 |

Totals : 826.73436 96.57656

=====  
 \*\*\* End of Report \*\*\*

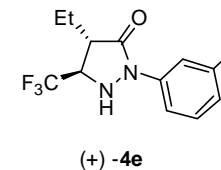



Data File C:\CHEM32\1\DATA\ZH00-14\YZN005769.D  
 Sample Name: ZC-5-86D+-

=====  
 Acq. Operator : Z  
 Acq. Instrument : Instrument 1 Location : Vial 1  
 Injection Date : 7/30/2014 9:12:32 AM  
 Acq. Method : C:\CHEM32\1\METHODS\DEF LC.M  
 Last changed : 7/30/2014 9:11:39 AM by Z  
 (modified after loading)  
 Analysis Method : C:\CHEM32\1\METHODS\DEF LC.M  
 Last changed : 12/4/2014 9:37:43 PM by Z  
 (modified after loading)  
 Sample Info : AD-H , H/i-PrOH = 70/30 0.7 mL/min, 30 oC, 254 nm

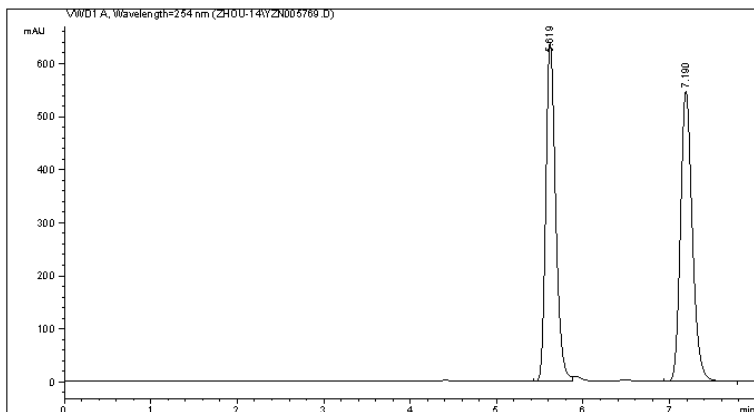

=====  
 Area Percent Report  
 =====

Sorted By : Signal  
 Multiplier: : 1.0000  
 Dilution: : 1.0000  
 Use Multiplier & Dilution Factor with ISTDs

Signal 1: VWD1 A, Wavelength=254 nm

| Peak # | RetTime [min] | Type | Width [min] | Area mAU   | Height %s | Area %  |
|--------|---------------|------|-------------|------------|-----------|---------|
| 1      | 5.619         | VV   | 0.1213      | 5038.87988 | 637.91187 | 49.2415 |
| 2      | 7.190         | BB   | 0.1457      | 5194.11768 | 547.28534 | 50.7585 |

Totals : 1.02330e4 1185.19720

=====  
 \*\*\* End of Report \*\*\*

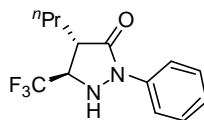

(+/-) -4f

Data File C:\CHEM32\1\DATA\ZH00-14\YZN005768.D  
 Sample Name: ZC-5-86D

=====  
 Acq. Operator : Z  
 Acq. Instrument : Instrument 1 Location : Vial 1  
 Injection Date : 7/30/2014 8:48:37 AM  
 Acq. Method : C:\CHEM32\1\METHODS\DEF LC.M  
 Last changed : 7/30/2014 8:16:45 AM by Z  
 (modified after loading)  
 Analysis Method : C:\CHEM32\1\METHODS\DEF LC.M  
 Last changed : 12/4/2014 9:37:43 PM by Z  
 (modified after loading)  
 Sample Info : AD-H , H/i-PrOH = 70/30 0.7 mL/min, 30 oC, 254 nm

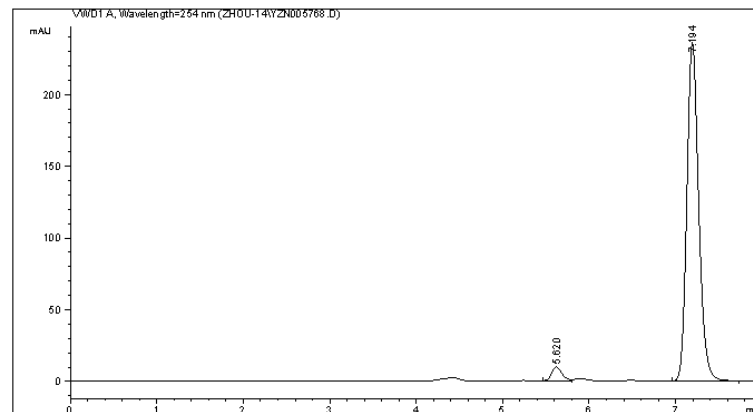

=====  
 Area Percent Report  
 =====

Sorted By : Signal  
 Multiplier: : 1.0000  
 Dilution: : 1.0000  
 Use Multiplier & Dilution Factor with ISTDs

Signal 1: VWD1 A, Wavelength=254 nm

| Peak # | RetTime [min] | Type | Width [min] | Area mAU   | Height %s | Area %  |
|--------|---------------|------|-------------|------------|-----------|---------|
| 1      | 5.620         | BV   | 0.1283      | 79.75753   | 9.52649   | 3.4421  |
| 2      | 7.194         | BB   | 0.1457      | 2237.34302 | 235.64395 | 96.5579 |

Totals : 2317.10055 245.17044

=====  
 \*\*\* End of Report \*\*\*

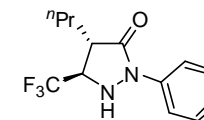

(-) -4f

Data File C:\CHEM32\1\DATA\ZH00-14\YZN005133.D  
 Sample Name: ZC-5-42

```

=====
Acq. Operator   : Z
Acq. Instrument : Instrument 1          Location : Vial 1
Injection Date  : 5/27/2014 2:58:09 PM
Acq. Method    : C:\CHEM32\1\METHODS\DEF LC.M
Last changed   : 5/27/2014 2:35:10 PM by Z
                (modified after loading)
Analysis Method : C:\CHEM32\1\METHODS\DEF LC.M
Last changed   : 12/5/2014 10:35:55 AM by Z
                (modified after loading)
Sample Info    : AD-H, H/i-PrOH = 70/30, 0.7 mL/min, 30 oC, 254 nm
  
```

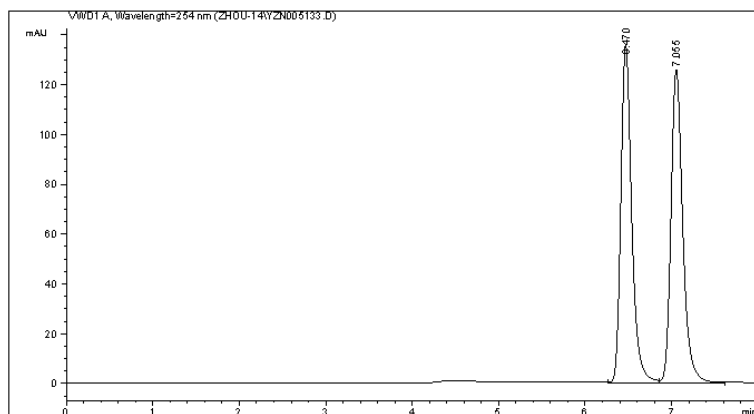

Area Percent Report

```

Sorted By      :      Signal
Multiplier:    :      1.0000
Dilution:      :      1.0000
Use Multiplier & Dilution Factor with ISTDs
  
```

Signal 1: VWD1 A, Wavelength=254 nm

| Peak # | RetTime [min] | Type | Width [min] | Area mAU   | Height %s | Area %  |
|--------|---------------|------|-------------|------------|-----------|---------|
| 1      | 6.470         | VV   | 0.1320      | 1179.32263 | 135.60698 | 49.8211 |
| 2      | 7.055         | VB   | 0.1436      | 1187.79102 | 125.86638 | 50.1789 |

Totals : 2367.11365 261.47336

\*\*\* End of Report \*\*\*

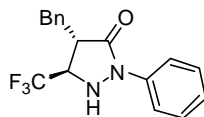

(-)-4g

Data File C:\CHEM32\1\DATA\ZH00-14\YZN005774.D  
 Sample Name: ZC-5-85

```

=====
Acq. Operator   : Z
Acq. Instrument : Instrument 1          Location : Vial 1
Injection Date  : 7/30/2014 10:32:04 AM
Acq. Method    : C:\CHEM32\1\METHODS\DEF LC.M
Last changed   : 7/30/2014 10:30:12 AM by Z
                (modified after loading)
Analysis Method : C:\CHEM32\1\METHODS\DEF LC.M
Last changed   : 12/5/2014 10:35:55 AM by Z
                (modified after loading)
Sample Info    : AD-H, H/i-PrOH = 70/30 0.7 mL/min, 30 oC, 254 nm
  
```

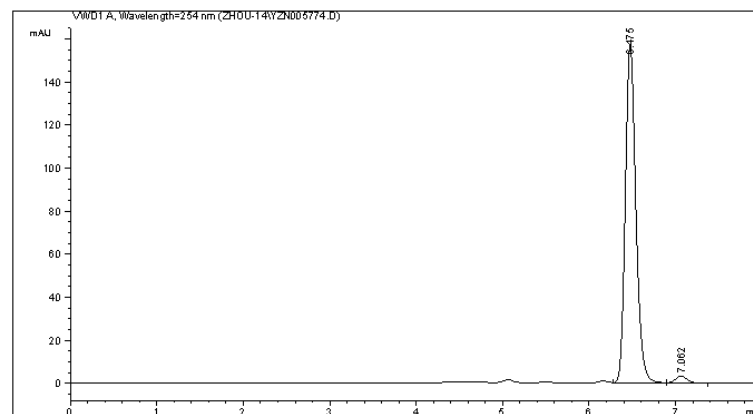

Area Percent Report

```

Sorted By      :      Signal
Multiplier:    :      1.0000
Dilution:      :      1.0000
Use Multiplier & Dilution Factor with ISTDs
  
```

Signal 1: VWD1 A, Wavelength=254 nm

| Peak # | RetTime [min] | Type | Width [min] | Area mAU   | Height %s | Area %  |
|--------|---------------|------|-------------|------------|-----------|---------|
| 1      | 6.475         | VV   | 0.1295      | 1330.98718 | 157.02785 | 97.7393 |
| 2      | 7.062         | VB   | 0.1438      | 30.78589   | 3.25714   | 2.2607  |

Totals : 1361.77308 160.28499

\*\*\* End of Report \*\*\*

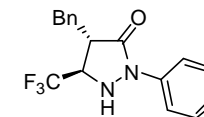

(+)-4g

Data File G:\吡唑\机理实验产物图\44C\YZ006700.D  
 Sample Name: ZC-6-44C+-

=====  
 Acq. Operator : ZHOU  
 Acq. Instrument : Instrument 1 Location : Vial 1  
 Injection Date : 11/18/2014 12:24:36 PM  
 Acq. Method : C:\HPCHEM\1\METHODS\DEF LC1.M  
 Last changed : 11/18/2014 12:21:56 PM by ZHOU  
 (modified after loading)  
 Analysis Method : C:\CHEM32\1\METHODS\DEF LC.M  
 Last changed : 12/20/2014 11:20:25 AM by Z  
 (modified after loading)  
 Sample Info : OD-H, H/i-PrOH = 90/10, 0.8 mL/min, 30 oC, 254 nm

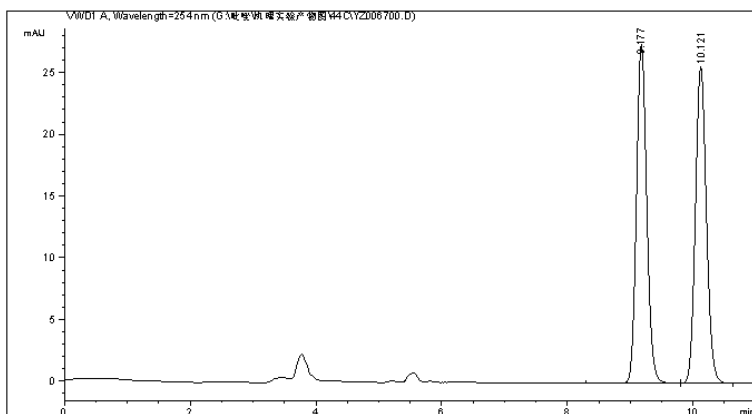

=====  
 Area Percent Report  
 =====

Sorted By : Signal  
 Multiplier: : 1.0000  
 Dilution: : 1.0000  
 Use Multiplier & Dilution Factor with ISTDs

Signal 1: VWD1 A, Wavelength=254 nm

| Peak # | RetTime [min] | Type | Width [min] | Area mAU *s | Height [mAU] | Area %  |
|--------|---------------|------|-------------|-------------|--------------|---------|
| 1      | 9.177         | VV   | 0.1770      | 313.46347   | 27.42233     | 50.1650 |
| 2      | 10.121        | VV   | 0.1884      | 311.40149   | 25.62359     | 49.8350 |

Totals : 624.86496 53.04592

=====  
 \*\*\* End of Report \*\*\*

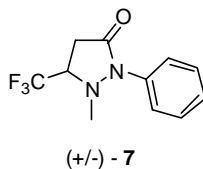

Data File G:\吡唑\机理实验产物图\44C\YZ006701.D  
 Sample Name: ZC-6-44C

=====  
 Acq. Operator : ZHOU  
 Acq. Instrument : Instrument 1 Location : Vial 1  
 Injection Date : 11/18/2014 12:37:24 PM  
 Acq. Method : C:\HPCHEM\1\METHODS\DEF LC1.M  
 Last changed : 11/18/2014 12:36:11 PM by ZHOU  
 (modified after loading)  
 Analysis Method : C:\CHEM32\1\METHODS\DEF LC.M  
 Last changed : 12/20/2014 11:19:38 AM by Z  
 (modified after loading)  
 Sample Info : OD-H, H/i-PrOH = 90/10, 0.8 mL/min, 30 oC, 254 nm

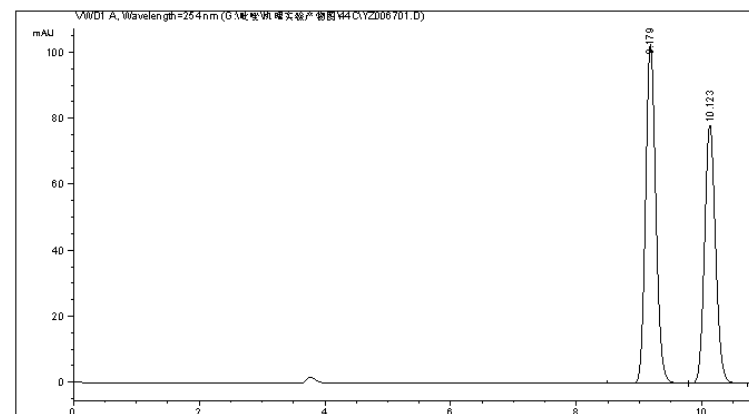

=====  
 Area Percent Report  
 =====

Sorted By : Signal  
 Multiplier: : 1.0000  
 Dilution: : 1.0000  
 Use Multiplier & Dilution Factor with ISTDs

Signal 1: VWD1 A, Wavelength=254 nm

| Peak # | RetTime [min] | Type | Width [min] | Area mAU *s | Height [mAU] | Area %  |
|--------|---------------|------|-------------|-------------|--------------|---------|
| 1      | 9.179         | VV   | 0.1756      | 1159.77759  | 102.57599    | 54.9986 |
| 2      | 10.123        | VV   | 0.1881      | 948.96246   | 78.25777     | 45.0014 |

Totals : 2108.74005 180.83376

=====  
 \*\*\* End of Report \*\*\*

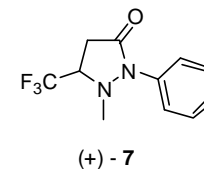

Data File G:\吡唑\机理实验产物图\44A\YZ006699.D  
 Sample Name: ZC-6-44A+-

=====  
 Acq. Operator : ZHOU  
 Acq. Instrument : Instrument 1 Location : Vial 1  
 Injection Date : 11/18/2014 12:06:12 PM  
 Acq. Method : C:\HPCHEM\1\METHODS\DEF LC1.M  
 Last changed : 11/18/2014 11:57:14 AM by ZHOU  
 (modified after loading)  
 Analysis Method : C:\CHEM32\1\METHODS\DEF LC.M  
 Last changed : 12/20/2014 11:18:08 AM by Z  
 (modified after loading)  
 Sample Info : OD-H, H/i-PrOH = 90/10, 0.8 mL/min, 30 oC, 254 nm

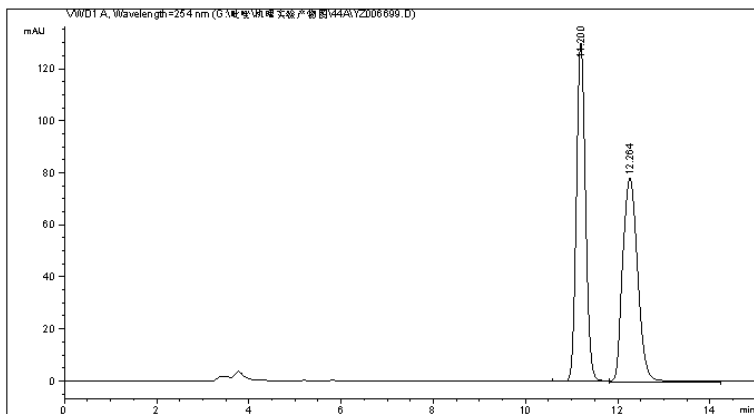

=====  
 Area Percent Report  
 =====

Sorted By : Signal  
 Multiplier: : 1.0000  
 Dilution: : 1.0000  
 Use Multiplier & Dilution Factor with ISTDs

Signal 1: VWD1 A, Wavelength=254 nm

| Peak # | RetTime [min] | Type | Width [min] | Area mAU   | Height %s | Area [mAU] | Area % |
|--------|---------------|------|-------------|------------|-----------|------------|--------|
| 1      | 11.200        | VV   | 0.2124      | 1784.32935 | 130.15268 | 50.3100    |        |
| 2      | 12.264        | VB   | 0.3680      | 1762.34241 | 78.13858  | 49.6900    |        |

Totals : 3546.67175 208.29126

=====  
 \*\*\* End of Report \*\*\*

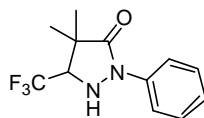

(+/-) -9

Data File G:\吡唑\机理实验产物图\44A\YZ006698.D  
 Sample Name: ZC-6-44A

=====  
 Acq. Operator : ZHOU  
 Acq. Instrument : Instrument 1 Location : Vial 1  
 Injection Date : 11/18/2014 11:40:02 AM  
 Acq. Method : C:\HPCHEM\1\METHODS\DEF LC1.M  
 Last changed : 11/18/2014 11:21:46 AM by ZHOU  
 (modified after loading)  
 Analysis Method : C:\CHEM32\1\METHODS\DEF LC.M  
 Last changed : 12/20/2014 11:18:08 AM by Z  
 (modified after loading)  
 Sample Info : OD-H, H/i-PrOH = 90/10, 0.8 mL/min, 30 oC, 254 nm

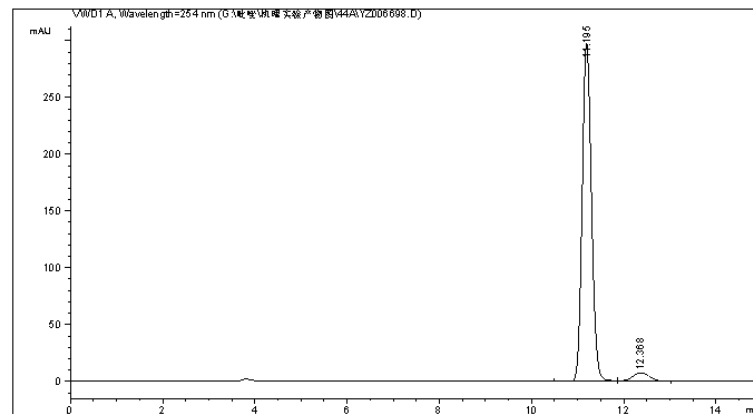

=====  
 Area Percent Report  
 =====

Sorted By : Signal  
 Multiplier: : 1.0000  
 Dilution: : 1.0000  
 Use Multiplier & Dilution Factor with ISTDs

Signal 1: VWD1 A, Wavelength=254 nm

| Peak # | RetTime [min] | Type | Width [min] | Area mAU   | Height %s | Area [mAU] | Area % |
|--------|---------------|------|-------------|------------|-----------|------------|--------|
| 1      | 11.195        | EV   | 0.2188      | 4178.64844 | 298.17264 | 95.2759    |        |
| 2      | 12.368        | VV   | 0.4133      | 207.19157  | 7.69088   | 4.7241     |        |

Totals : 4385.84001 305.86351

=====  
 \*\*\* End of Report \*\*\*

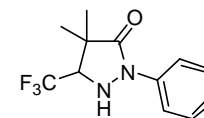

(+) -9
